# Supplementary material for: Identification of DEGs and transcription factors involved in H. pylori-associated inflammation and their relevance with gastric cancer
Source: PeerJ. 2020 Jun 3;8:e9223. doi: 10.7717/peerj.9223 (PMC7275685; doi:10.7717/peerj.9223)
Supplement: Table S1 — For the data set with the GEO accession number GSE27411, three cases of no H. pylori infection (Hp−-No) and three cases of H. pylori infection without corpus-predominant AG (Hp+-NAG) were included. GEO2R was undertook to screen DEGs between Hp−-No with Hp+-NAG. [file peerj-08-9223-s001.xlsx]

## Sheet: 27411炎症
ID	adj.P.Val	P.Value	t	B	logFC	Gene.symbol	Gene.title
ILMN_1789	7.23e-05	4.48e-09	23.2475	8.15398	5.18635	CCL20	C-C motif chemokine ligand 20
ILMN_21398	7.23e-05	7.03e-09	22.0482	7.99572	4.8144	CXCL5	C-X-C motif chemokine ligand 5
ILMN_13882	0.0013987	2.04e-07	-14.7732	6.42469	-3.49241	FGB	fibrinogen beta chain
ILMN_2247	0.0015201	2.95e-07	14.128	6.20796	3.5471	CXCL8	C-X-C motif chemokine ligand 8
ILMN_20794	0.0016881	4.1e-07	13.5794	6.00911	3.75151	LCN2	lipocalin 2
ILMN_21287	0.0088452	2.58e-06	10.8462	4.77195	2.00516	TNFRSF6B	TNF receptor superfamily member 6b
ILMN_29078	0.0097834	3.33e-06	10.5088	4.58474	3.30151	CXCL2	C-X-C motif chemokine ligand 2
ILMN_13933	0.0122999	4.78e-06	10.0448	4.31247	1.90909	PIGR	polymeric immunoglobulin receptor
ILMN_2585	0.0140083	6.12e-06	9.73775	4.12223	1.97983	ASRGL1	asparaginase like 1
ILMN_9376	0.0181213	8.8e-06	9.30266	3.83802	4.28771	CYP4F11	cytochrome P450 family 4 subfamily F member 11
ILMN_10389	0.0222172	1.19e-05	8.95632	3.59878	1.58011	POLQ	DNA polymerase theta
ILMN_17166	0.0227757	1.34e-05	8.81961	3.501	2.10077	CXCL1	C-X-C motif chemokine ligand 1
ILMN_22919	0.0227757	1.49e-05	8.69788	3.41229	1.69632	TRIM31	tripartite motif containing 31
ILMN_4420	0.0227757	1.55e-05	8.65734	3.3824	2.00687
ILMN_13685	0.0310126	2.26e-05	8.24678	3.06955	6.39656	PI3	peptidase inhibitor 3
ILMN_17175	0.0346204	2.98e-05	7.95555	2.836	2.78348	LAIR2	leukocyte associated immunoglobulin like receptor 2
ILMN_20313	0.0346204	2.99e-05	-7.95111	2.83237	-2.47932	CYP4F22	cytochrome P450 family 4 subfamily F member 22
ILMN_30154	0.0346204	3.19e-05	7.88537	2.77821	1.89583	TK1	thymidine kinase 1
ILMN_25327	0.0346204	3.35e-05	7.83547	2.73676	1.48448	CHEK1	checkpoint kinase 1
ILMN_27148	0.0346204	3.44e-05	7.80863	2.71434	4.00803	SLC6A14	solute carrier family 6 member 14
ILMN_3897	0.0346204	3.53e-05	7.78156	2.69164	2.19758	BIRC3	baculoviral IAP repeat containing 3
ILMN_13072	0.0349517	3.92e-05	7.67608	2.60231	2.65582	S100A8	S100 calcium binding protein A8
ILMN_28398	0.0349517	4.13e-05	7.62333	2.55712	1.61068	CHAF1B	chromatin assembly factor 1 subunit B
ILMN_11038	0.0349517	4.21e-05	7.60343	2.53998	1.69206	DDIAS	DNA damage induced apoptosis suppressor
ILMN_5998	0.0349517	4.35e-05	7.57248	2.51322	1.56415
ILMN_21209	0.0349517	4.41e-05	7.55693	2.49973	1.51722	CDC42EP5	CDC42 effector protein 5
ILMN_24809	0.0380858	4.99e-05	7.43463	2.39255	1.49435	PPP1R14D	protein phosphatase 1 regulatory inhibitor subunit 14D
ILMN_18526	0.0429091	5.84e-05	7.28281	2.25679	1.26874	NFKBIZ	NFKB inhibitor zeta
ILMN_3057	0.0431314	6.08e-05	7.24391	2.22151	1.71532	CDCA5	cell division cycle associated 5
ILMN_4548	0.0432395	6.3e-05	7.20887	2.18957	1.43321	E2F7	E2F transcription factor 7
ILMN_2155	0.0453577	6.83e-05	7.13173	2.11865	1.4465	NLRP7	NLR family pyrin domain containing 7
ILMN_4627	0.0485781	7.66e-05	7.02336	2.01765	2.57942	KYNU	kynureninase
ILMN_16565	0.0485781	7.79e-05	7.00757	2.0028	3.35116	VNN2	vanin 2
ILMN_3656	0.055286	9.3e-05	6.84202	1.845	1.09179	HELLS	helicase, lymphoid-specific
ILMN_11198	0.055286	9.91e-05	-6.78289	1.78771	-1.53294	MT2A	metallothionein 2A
ILMN_22844	0.055286	0.0001	-6.77201	1.77711	-1.55426	GSTA3	glutathione S-transferase alpha 3
ILMN_6392	0.055286	0.0001	-6.7708	1.77593	-1.09624
ILMN_26250	0.055286	0.000105	6.72625	1.73236	6.98909	DEFB4A	defensin beta 4A
ILMN_13235	0.055286	0.000109	6.69483	1.70145	1.21606	STIL	SCL/TAL1 interrupting locus
ILMN_25434	0.055286	0.000113	6.66535	1.67232	1.60734	ADORA2B	adenosine A2b receptor
ILMN_11616	0.055286	0.000115	6.64955	1.65667	1.21323	RFC3	replication factor C subunit 3
ILMN_12351	0.055286	0.000122	6.59614	1.60345	1.3145	CENPM	centromere protein M
ILMN_3628	0.055286	0.000123	6.58674	1.59404	1.82702	DSCC1	DNA replication and sister chromatid cohesion 1
ILMN_137078	0.055286	0.000131	6.52977	1.53673	2.43102	C16orf59	chromosome 16 open reading frame 59
ILMN_21982	0.055286	0.000132	6.52559	1.53251	1.83948	BAIAP2L2	BAI1 associated protein 2 like 2
ILMN_26336	0.055286	0.000132	6.52241	1.5293	1.01712	TICRR	TOPBP1 interacting checkpoint and replication regulator
ILMN_13997	0.055286	0.000135	6.50085	1.50747	1.1159	PITX2	paired like homeodomain 2
ILMN_15164	0.055286	0.000135	6.50012	1.50673	2.10003	AQP9	aquaporin 9
ILMN_7995	0.055286	0.000136	-6.49697	1.50353	-1.58193	RGS7	regulator of G-protein signaling 7
ILMN_28973	0.055286	0.000137	-6.4911	1.49757	-2.65736	ALB	albumin
ILMN_138879	0.055286	0.000137	6.49066	1.49712	1.11568	FANCI	Fanconi anemia complementation group I
ILMN_25969	0.0589975	0.000149	6.41579	1.42065	1.1366	KIF2C	kinesin family member 2C
ILMN_6783	0.0596702	0.000161	-6.34867	1.35138	-1.53295	MRPL43	mitochondrial ribosomal protein L43
ILMN_22216	0.0596702	0.000163	-6.33667	1.33893	-1.23255	SCPEP1	serine carboxypeptidase 1
ILMN_1150	0.0596702	0.000165	6.32693	1.3288	1.04145	FANCB	Fanconi anemia complementation group B
ILMN_16938	0.0596702	0.000166	6.32162	1.32327	1.26818	ERCC6L	ERCC excision repair 6 like, spindle assembly checkpoint helicase
ILMN_19736	0.0596702	0.000167	6.31603	1.31745	1.40274	LGALS2	galectin 2
ILMN_11844	0.0596702	0.000169	6.30574	1.30671	1.03393	FANCD2	Fanconi anemia complementation group D2
ILMN_25191	0.0596702	0.000171	6.29497	1.29547	1.03745	HAMP	hepcidin antimicrobial peptide
ILMN_15254	0.0636707	0.000193	6.18813	1.18292	1.08352	CCNB2	cyclin B2
ILMN_23940	0.0636707	0.000194	6.18403	1.17856	1.14772	GPRC5A	G protein-coupled receptor class C group 5 member A
ILMN_9455	0.0636707	0.0002	6.15989	1.15288	1.06402	CCDC24	coiled-coil domain containing 24
ILMN_14702	0.0636707	0.000202	6.14976	1.14207	1.28748	CKS2	CDC28 protein kinase regulatory subunit 2
ILMN_10772	0.0636707	0.000206	6.13188	1.12296	1.41769	RPL29	ribosomal protein L29
ILMN_16362	0.0636707	0.000208	6.12466	1.11523	1.74418	NFKBIZ	NFKB inhibitor zeta
ILMN_19730	0.0636707	0.000211	6.11238	1.10205	1.92913	E2F2	E2F transcription factor 2
ILMN_1278	0.0636707	0.000214	6.10161	1.09049	1.25098	RAD54L	RAD54-like (S. cerevisiae)
ILMN_15875	0.0636707	0.000214	6.10131	1.09016	1.20432	MYB	MYB proto-oncogene, transcription factor
ILMN_3407	0.0636707	0.000216	6.09261	1.0808	1.3924	MCM4	minichromosome maintenance complex component 4
ILMN_2483	0.0636707	0.000224	6.0608	1.04649	1.77508	MCM10	minichromosome maintenance 10 replication initiation factor
ILMN_21947	0.0636707	0.000225	6.05952	1.0451	1.43607	CENPM	centromere protein M
ILMN_1770	0.0636707	0.000225	6.05766	1.04309	1.02593	TACC3	transforming acidic coiled-coil containing protein 3
ILMN_15219	0.0636707	0.00023	-6.04157	1.02566	-1.35918	KIAA1191	KIAA1191
ILMN_15061	0.0636707	0.000231	6.0352	1.01875	1.18927	TRIP13	thyroid hormone receptor interactor 13
ILMN_968	0.0636707	0.000236	6.01904	1.00119	1.82455	PDZK1IP1	PDZK1 interacting protein 1
ILMN_25245	0.0636707	0.000238	-6.01241	0.99398	-1.75709	MT1M	metallothionein 1M
ILMN_19331	0.0636707	0.00024	6.00553	0.98648	1.00291	CDCA2	cell division cycle associated 2
ILMN_4443	0.0636707	0.000246	5.98273	0.96158	1.07499	IFNE	interferon epsilon
ILMN_138005	0.0636707	0.000249	-5.97293	0.95085	-1.32762	MT1E	metallothionein 1E
ILMN_5066	0.0636707	0.000254	5.95744	0.93388	1.88492	CXCL10	C-X-C motif chemokine ligand 10
ILMN_14011	0.0636707	0.000255	5.95178	0.92765	3.78664	VNN1	vanin 1
ILMN_13494	0.0636707	0.000259	5.93922	0.91385	1.28784	MELK	maternal embryonic leucine zipper kinase
ILMN_20816	0.0636707	0.000261	5.93372	0.90779	3.35232	LTF	lactotransferrin
ILMN_2333	0.0636707	0.000262	-5.93137	0.9052	-2.15897	ATP13A5	ATPase 13A5
ILMN_28367	0.0636707	0.000263	-5.92568	0.89894	-1.32224	DUSP19	dual specificity phosphatase 19
ILMN_16700	0.0636707	0.000266	5.91759	0.89	1.40469	CENPU	centromere protein U
ILMN_19059	0.0663237	0.000283	-5.86626	0.83313	-1.59975	TMEM200A	transmembrane protein 200A
ILMN_26899	0.0663237	0.000283	5.86433	0.83098	1.80298	TYMS	thymidylate synthetase
ILMN_16427	0.0668763	0.000292	5.84004	0.80392	1.06238	CCNA2	cyclin A2
ILMN_18129	0.0668763	0.000292	5.83876	0.80248	2.00826	ZG16B	zymogen granule protein 16B
ILMN_21836	0.0679656	0.0003	5.81621	0.77726	1.28112	ORC1	origin recognition complex subunit 1
ILMN_26854	0.0680498	0.000307	5.79738	0.75614	1.73587	GINS2	GINS complex subunit 2
ILMN_9269	0.0680498	0.000313	5.78324	0.74024	1.66948	PLEKHS1	pleckstrin homology domain containing S1
ILMN_7092	0.0680498	0.000316	5.77412	0.72998	1.62683	EXO1	exonuclease 1
ILMN_1490	0.0680498	0.000317	5.77308	0.72881	1.06616	VNN3	vanin 3
ILMN_7868	0.0680498	0.000322	5.75889	0.71279	1.23881	SPRR1A	small proline rich protein 1A
ILMN_3927	0.0680498	0.000322	-5.7588	0.7127	-1.06291	C9orf66	chromosome 9 open reading frame 66
ILMN_10359	0.0680498	0.000324	5.75405	0.70732	1.02349	SPAG5	sperm associated antigen 5
ILMN_6733	0.0681788	0.000331	5.73653	0.6875	1.17351	SNX5	sorting nexin 5
ILMN_15250	0.0681788	0.000331	-5.7359	0.68679	-1.24066	ZSCAN31	zinc finger and SCAN domain containing 31
ILMN_17824	0.0682387	0.000335	5.72702	0.67672	2.46149	CXCL11	C-X-C motif chemokine ligand 11
ILMN_25857	0.0689332	0.000342	5.71066	0.65813	1.54393	IRAK3	interleukin 1 receptor associated kinase 3
ILMN_11101	0.0698995	0.00035	5.69131	0.63609	1.53173	CXCL6	C-X-C motif chemokine ligand 6
ILMN_15509	0.0709193	0.000361	5.66471	0.60571	3.12208	SAA2	serum amyloid A2
ILMN_28065	0.0709193	0.000362	-5.66296	0.6037	-1.36234	SYT13	synaptotagmin 13
ILMN_25474	0.0709193	0.00037	5.64605	0.58432	1.09707	IQGAP3	IQ motif containing GTPase activating protein 3
ILMN_29332	0.0709193	0.000371	5.64304	0.58087	1.2974	KCND3	potassium voltage-gated channel subfamily D member 3
ILMN_5226	0.0709193	0.000372	-5.64091	0.57842	-1.34882	SPINK2	serine peptidase inhibitor, Kazal type 2
ILMN_8141	0.072989	0.000386	5.61012	0.54298	4.15221	SERPINB7	serpin family B member 7
ILMN_137482	0.0735813	0.000393	5.5962	0.52691	1.04616	PARPBP	PARP1 binding protein
ILMN_5297	0.0736075	0.000402	5.579	0.507	0.87898	XRCC3	X-ray repair cross complementing 3
ILMN_12496	0.0736075	0.000403	-5.57664	0.50426	-1.22136	INSIG1	insulin induced gene 1
ILMN_4641	0.0736075	0.00041	5.56173	0.48697	1.32373	HLA-DPB1	major histocompatibility complex, class II, DP beta 1
ILMN_3169	0.0736075	0.000412	-5.5577	0.48228	-2.86335	GUCA2B	guanylate cyclase activator 2B
ILMN_20465	0.0736075	0.000412	5.55767	0.48225	0.904656	PRC1	protein regulator of cytokinesis 1
ILMN_16948	0.0736075	0.000415	5.55182	0.47545	0.98824	FAM83D	family with sequence similarity 83 member D
ILMN_27323	0.0736075	0.00042	-5.5435	0.46577	-0.995029	CNGA1	cyclic nucleotide gated channel alpha 1
ILMN_27253	0.0736075	0.000424	5.53564	0.45661	1.09729	CCNF	cyclin F
ILMN_4549	0.0736075	0.000429	5.52617	0.44557	1.42279	PBK	PDZ binding kinase
ILMN_5536	0.0736075	0.000432	5.52003	0.43839	1.01361	ADGRG6	adhesion G protein-coupled receptor G6
ILMN_29702	0.0736075	0.000434	5.51683	0.43466	1.76059	DTL	denticleless E3 ubiquitin protein ligase homolog
ILMN_25046	0.0736075	0.000436	5.51264	0.42975	1.32138	RAD51AP1	RAD51 associated protein 1
ILMN_12005	0.073716	0.000444	5.4988	0.41356	1.84024	UHRF1	ubiquitin like with PHD and ring finger domains 1
ILMN_21369	0.073716	0.000447	5.49305	0.40681	0.872648	TIMELESS	timeless circadian clock
ILMN_137041	0.073716	0.000451	5.48509	0.39747	1.0125	HJURP	Holliday junction recognition protein
ILMN_15846	0.073716	0.000455	5.47798	0.38912	1.08242	PLK4	polo like kinase 4
ILMN_19957	0.073716	0.000463	-5.46459	0.37337	-1.00038	PTPRM	protein tyrosine phosphatase, receptor type M
ILMN_28483	0.073716	0.000466	5.4604	0.36843	1.1458	CKAP2L	cytoskeleton associated protein 2 like
ILMN_2942	0.073716	0.000468	5.45679	0.36418	1.6562	HLA-DRB3	major histocompatibility complex, class II, DR beta 3
ILMN_19352	0.073716	0.000473	-5.44734	0.35303	-1.19114	ZSCAN1	zinc finger and SCAN domain containing 1
ILMN_23805	0.073716	0.000474	-5.44624	0.35173	-2.08157	ETNPPL	ethanolamine-phosphate phospho-lyase
ILMN_25831	0.073716	0.000475	5.44477	0.35	1.14701	FAM3D	family with sequence similarity 3 member D
ILMN_10590	0.073716	0.000476	5.44261	0.34745	0.91183	BUB1	BUB1 mitotic checkpoint serine/threonine kinase
ILMN_23579	0.075049	0.000488	5.42244	0.3236	0.909996	POC1A	POC1 centriolar protein A
ILMN_25780	0.0758592	0.000497	5.40805	0.30653	1.01383	PCDH7	protocadherin 7
ILMN_12248	0.0758874	0.000501	5.40191	0.29925	1.48643	CFB	complement factor B
ILMN_7979	0.0772817	0.000514	5.38174	0.27525	1.93484	IGSF6	immunoglobulin superfamily member 6
ILMN_6470	0.0791612	0.000531	5.35707	0.24582	1.10807	CEP55	centrosomal protein 55
ILMN_25781	0.0803188	0.000542	5.33998	0.22536	1.33481	CDC45	cell division cycle 45
ILMN_26377	0.0808482	0.00055	-5.32919	0.21243	-1.09496	KLF12	Kruppel like factor 12
ILMN_7440	0.0817517	0.000562	-5.31147	0.19114	-1.21203	TEF	TEF, PAR bZIP transcription factor
ILMN_27932	0.0817517	0.000569	5.30229	0.18009	1.82572	PIM2	Pim-2 proto-oncogene, serine/threonine kinase
ILMN_26148	0.0817517	0.00057	5.30141	0.17903	1.51186	ASF1B	anti-silencing function 1B histone chaperone
ILMN_138827	0.0817517	0.000572	5.29842	0.17543	1.81272	CDCA7	cell division cycle associated 7
ILMN_20684	0.0823912	0.000581	-5.28568	0.16006	-1.34155	TSPAN7	tetraspanin 7
ILMN_27122	0.0823912	0.000585	-5.28038	0.15366	-1.4174	C6orf1	chromosome 6 open reading frame 1
ILMN_3987	0.0823912	0.000588	-5.27623	0.14865	-1.04457	F5	coagulation factor V
ILMN_5569	0.0824638	0.000593	5.27026	0.14143	1.48596
ILMN_11774	0.0827154	0.0006	5.26114	0.13039	0.91341	CENPJ	centromere protein J
ILMN_1909	0.0827154	0.000604	-5.25528	0.12328	-0.877278	ISCU	iron-sulfur cluster assembly enzyme
ILMN_12841	0.0827154	0.000607	-5.25226	0.11962	-0.851079	HTR1E	5-hydroxytryptamine receptor 1E
ILMN_1724	0.0833052	0.000615	-5.2416	0.10669	-1.6857	DBP	D-box binding PAR bZIP transcription factor
ILMN_10152	0.0837705	0.000623	-5.23218	0.09524	-0.846641	DHRS4	dehydrogenase/reductase 4
ILMN_17136	0.0851111	0.000637	5.21386	0.07293	1.57029	SLC2A6	solute carrier family 2 member 6
ILMN_25890	0.0851111	0.000643	5.20718	0.06479	1.15298	KNTC1	kinetochore associated 1
ILMN_10005	0.0851111	0.000645	5.20482	0.06191	0.948442	CCNB1	cyclin B1
ILMN_138561	0.0870808	0.000668	-5.1777	0.02875	-1.18456	PDGFD	platelet derived growth factor D
ILMN_16612	0.0870808	0.000668	5.17729	0.02824	1.06001	RFC5	replication factor C subunit 5
ILMN_26797	0.0874699	0.000675	-5.16899	0.01806	-0.853271	ALDH3B1	aldehyde dehydrogenase 3 family member B1
ILMN_2252	0.0876106	0.000681	5.16292	0.01061	1.3159	HLA-DMB	major histocompatibility complex, class II, DM beta
ILMN_14571	0.0883884	0.000695	5.14683	-0.00916	0.865562	SLC4A11	solute carrier family 4 member 11
ILMN_15264	0.0883884	0.000696	-5.14613	-0.01002	-1.16885
ILMN_24010	0.0883884	0.0007	5.14182	-0.01532	0.902791	PRR14L	proline rich 14 like
ILMN_1820	0.0901483	0.000718	-5.12199	-0.03978	-1.6229	FRMD1	FERM domain containing 1
ILMN_20361	0.0907982	0.00073	-5.10968	-0.05498	-0.858576	SMPD4	sphingomyelin phosphodiesterase 4
ILMN_24793	0.0907982	0.000733	5.10646	-0.05897	1.26206	CDK1	cyclin dependent kinase 1
ILMN_4880	0.0907982	0.000737	5.10185	-0.06466	0.906897	DLGAP5	DLG associated protein 5
ILMN_1154	0.0907982	0.000743	5.09632	-0.07152	1.33821	PKMYT1	protein kinase, membrane associated tyrosine/threonine 1
ILMN_12352	0.0907982	0.000745	5.09349	-0.07503	0.936292	AURKA	aurora kinase A
ILMN_1521	0.0912917	0.000755	5.0832	-0.08779	3.55262	IL19	interleukin 19
ILMN_27645	0.0912917	0.00076	-5.07829	-0.09389	-1.69348	CADM2	cell adhesion molecule 2
ILMN_23096	0.0912917	0.000763	5.07525	-0.09766	2.19348	SCGB3A1	secretoglobin family 3A member 1
ILMN_25405	0.0912917	0.000767	5.07148	-0.10234	1.17881	CENPW	centromere protein W
ILMN_12434	0.0914932	0.000775	-5.06372	-0.11199	-1.32862	RERG	RAS like estrogen regulated growth inhibitor
ILMN_4856	0.0914932	0.000781	5.05807	-0.11902	1.19405	RAD51	RAD51 recombinase
ILMN_16107	0.0914932	0.000782	5.0567	-0.12074	3.16502	SERPINA3	serpin family A member 3
ILMN_8946	0.0916107	0.000788	5.05141	-0.12733	0.800606	SGK2	SGK2, serine/threonine kinase 2
ILMN_28167	0.0924194	0.000799	5.04044	-0.14101	0.911159	NFKBIE	NFKB inhibitor epsilon
ILMN_16440	0.0929752	0.000808	-5.03162	-0.15202	-1.07656	PLCL1	phospholipase C like 1
ILMN_25740	0.0937743	0.00082	5.0209	-0.16543	1.20141	EZH2	enhancer of zeste 2 polycomb repressive complex 2 subunit
ILMN_23620	0.0942818	0.00083	5.01157	-0.17711	1.29325	NCAPG	non-SMC condensin I complex subunit G
ILMN_7509	0.0942818	0.000838	5.00399	-0.18662	0.920037	CENPE	centromere protein E
ILMN_1395	0.0942818	0.00084	5.0025	-0.18849	1.24052	PTPRR	protein tyrosine phosphatase, receptor type R
ILMN_15300	0.0942818	0.000843	5.00016	-0.19143	0.859585	BUB1B	BUB1 mitotic checkpoint serine/threonine kinase B
ILMN_5449	0.0956248	0.000859	4.98536	-0.21001	0.904347	CENPA	centromere protein A
ILMN_13141	0.0964395	0.000875	4.97186	-0.227	1.04573	TROAP	trophinin associated protein
ILMN_11495	0.0964395	0.000876	4.97084	-0.22829	1.67146	GCNT3	glucosaminyl (N-acetyl) transferase 3, mucin type
ILMN_15699	0.0965442	0.000884	4.96423	-0.23662	0.980214	TMEM45B	transmembrane protein 45B
ILMN_23396	0.0965442	0.000886	4.962	-0.23944	1.5247	EBI3	Epstein-Barr virus induced 3
ILMN_8137	0.0967652	0.000893	4.9563	-0.24663	0.854691	MYO18B	myosin XVIIIB
ILMN_9573	0.0991746	0.00092	4.93384	-0.27501	1.00659	UBE2T	ubiquitin conjugating enzyme E2 T
ILMN_4289	0.0999505	0.000932	4.92407	-0.2874	1.20085	RPS15	ribosomal protein S15
ILMN_28364	0.10209	0.00096	4.90176	-0.31572	3.13228	SAA1	serum amyloid A1
ILMN_24093	0.10209	0.000962	-4.90042	-0.31742	-2.1997	GPC3	glypican 3
ILMN_24005	0.102111	0.000967	-4.89642	-0.32252	-0.926841	SOSTDC1	sclerostin domain containing 1
ILMN_18637	0.102219	0.000978	4.88805	-0.33317	1.54872	RRM2	ribonucleotide reductase regulatory subunit M2
ILMN_15690	0.102219	0.000983	-4.88431	-0.33794	-1.01343	KCNMB2	potassium calcium-activated channel subfamily M regulatory beta subunit 2
ILMN_16363	0.102219	0.000983	4.88421	-0.33806	0.903293	TNFSF13	tumor necrosis factor superfamily member 13
ILMN_137805	0.102278	0.000989	4.88002	-0.34341	0.987508	AURKB	aurora kinase B
ILMN_2724	0.103968	0.00101	4.86405	-0.3638	0.833744	HPS1	HPS1, biogenesis of lysosomal organelles complex 3 subunit 1
ILMN_16902	0.104307	0.00102	4.8579	-0.37166	1.1712	GOLM1	golgi membrane protein 1
ILMN_23074	0.104567	0.00103	-4.85234	-0.37876	-1.75941	MT1H	metallothionein 1H
ILMN_14921	0.105094	0.00105	4.83853	-0.39646	3.06566	IL19	interleukin 19
ILMN_23894	0.105094	0.00105	4.83771	-0.39751	1.14716	GINS4	GINS complex subunit 4
ILMN_19235	0.105094	0.00105	-4.83763	-0.39761	-1.00136	SFTPB	surfactant protein B
ILMN_6398	0.107087	0.00107	4.82006	-0.42016	1.0164
ILMN_5464	0.108265	0.00109	-4.80836	-0.43522	-0.974191	ZCWPW1	zinc finger CW-type and PWWP domain containing 1
ILMN_2886	0.11078	0.00112	4.78778	-0.46174	0.926194	NAPRT	nicotinate phosphoribosyltransferase
ILMN_1999	0.11101	0.00113	4.7827	-0.4683	1.1973	CCL3	C-C motif chemokine ligand 3
ILMN_5047	0.111303	0.00114	4.77723	-0.47537	0.792566	RMI2	RecQ mediated genome instability 2
ILMN_18916	0.111966	0.00115	-4.76933	-0.48558	-0.786304	DHRS4L2	dehydrogenase/reductase 4 like 2
ILMN_5873	0.111997	0.00115	4.76564	-0.49036	1.41126
ILMN_10173	0.11204	0.00116	-4.76188	-0.49522	-0.928945	TMEM17	transmembrane protein 17
ILMN_1797	0.11342	0.00118	-4.74721	-0.51424	-1.38971	MT1A	metallothionein 1A
ILMN_20030	0.11342	0.00118	-4.74598	-0.51584	-0.986385	NEUROG2	neurogenin 2
ILMN_19315	0.113585	0.0012	-4.73695	-0.52756	-0.780993	MBD3L2	methyl-CpG binding domain protein 3 like 2
ILMN_5134	0.113585	0.0012	4.734	-0.53139	0.887776	C1orf112	chromosome 1 open reading frame 112
ILMN_28880	0.113585	0.00121	4.7327	-0.53309	1.1836
ILMN_20107	0.113585	0.00121	4.73057	-0.53585	0.942759	MCM5	minichromosome maintenance complex component 5
ILMN_12805	0.113585	0.00122	4.72209	-0.54689	1.02851	RECQL4	RecQ like helicase 4
ILMN_23205	0.113585	0.00123	4.72035	-0.54915	1.18085	ADRA2A	adrenoceptor alpha 2A
ILMN_13606	0.113585	0.00124	4.71422	-0.55713	1.38319	HLA-DPA1	major histocompatibility complex, class II, DP alpha 1
ILMN_18895	0.113585	0.00124	4.7128	-0.55898	2.19198	CDT1	chromatin licensing and DNA replication factor 1
ILMN_29396	0.113585	0.00124	4.71147	-0.56072	2.31945	PLA2G7	phospholipase A2 group VII
ILMN_15421	0.113585	0.00124	4.71058	-0.56187	1.69733	GNA15	G protein subunit alpha 15
ILMN_7068	0.113585	0.00125	-4.70504	-0.5691	-0.880504	ATP8A1	ATPase phospholipid transporting 8A1
ILMN_17343	0.113585	0.00126	4.69923	-0.57668	0.750409	MKI67	marker of proliferation Ki-67
ILMN_13834	0.113585	0.00127	-4.69612	-0.58074	-0.897154	PMEPA1	prostate transmembrane protein, androgen induced 1
ILMN_1127	0.113585	0.00127	4.69599	-0.58092	0.847906	PLK1	polo like kinase 1
ILMN_10275	0.113585	0.00127	4.69538	-0.58171	0.89183	RPS7	ribosomal protein S7
ILMN_2829	0.115953	0.0013	4.67712	-0.6056	2.50879	OAS1	2'-5'-oligoadenylate synthetase 1
ILMN_6858	0.116678	0.00131	4.6694	-0.6157	0.852911	PCNA	proliferating cell nuclear antigen
ILMN_26697	0.117583	0.00133	4.66062	-0.62721	0.968858	ORC6	origin recognition complex subunit 6
ILMN_21638	0.119606	0.00136	-4.64464	-0.6482	-0.800627	UNG	uracil DNA glycosylase
ILMN_18763	0.119606	0.00137	4.64196	-0.65172	1.04076	CDCA3	cell division cycle associated 3
ILMN_26329	0.119917	0.00137	-4.63698	-0.65828	-0.853427
ILMN_4712	0.120359	0.00139	-4.62974	-0.6678	-2.11716	SERPINA5	serpin family A member 5
ILMN_20366	0.120359	0.00139	4.62816	-0.66988	1.08821	DHFR	dihydrofolate reductase
ILMN_20133	0.120859	0.0014	4.6221	-0.67787	3.36211	UBD	ubiquitin D
ILMN_2026	0.120973	0.00141	4.6183	-0.68289	1.4924	KIAA0101	KIAA0101
ILMN_18699	0.120973	0.00142	-4.61536	-0.68676	-0.966872	SIT1	signaling threshold regulating transmembrane adaptor 1
ILMN_20921	0.121899	0.00143	4.60683	-0.69803	0.928094	ANLN	anillin actin binding protein
ILMN_12660	0.122873	0.00145	-4.59807	-0.70961	-1.13067	PITPNC1	phosphatidylinositol transfer protein, cytoplasmic 1
ILMN_1610	0.125418	0.00149	4.57804	-0.73612	1.0319	EMILIN2	elastin microfibril interfacer 2
ILMN_16145	0.125418	0.00149	4.57729	-0.73712	0.922115
ILMN_26207	0.125489	0.0015	4.57393	-0.74156	1.02822
ILMN_4591	0.126076	0.00151	-4.56763	-0.74993	-1.20223	EIF5A2	eukaryotic translation initiation factor 5A2
ILMN_23377	0.126555	0.00152	4.56197	-0.75744	3.74384	BPIFB1	BPI fold containing family B member 1
ILMN_8847	0.126587	0.00153	4.55888	-0.76155	0.721658	AWAT2	acyl-CoA wax alcohol acyltransferase 2
ILMN_2921	0.127071	0.00154	4.55324	-0.76905	1.029	COL16A1	collagen type XVI alpha 1 chain
ILMN_27165	0.127307	0.00156	4.54633	-0.77824	1.02877	PLA2G3	phospholipase A2 group III
ILMN_11323	0.127307	0.00156	4.54615	-0.77848	1.21061	CENPK	centromere protein K
ILMN_16883	0.127819	0.00157	4.53958	-0.78722	1.16823	OR2T27	olfactory receptor family 2 subfamily T member 27
ILMN_26165	0.127819	0.00158	-4.53757	-0.78991	-1.11314	AAMDC	adipogenesis associated Mth938 domain containing
ILMN_17400	0.128286	0.00159	4.53211	-0.79718	0.826558	ZNF341	zinc finger protein 341
ILMN_10287	0.12834	0.0016	4.52899	-0.80134	0.864855	ADTRP	androgen dependent TFPI regulating protein
ILMN_10946	0.129652	0.00163	4.51489	-0.82016	0.968518	LY75	lymphocyte antigen 75
ILMN_11532	0.129652	0.00163	-4.51346	-0.82207	-1.07275
ILMN_23186	0.129652	0.00163	4.51331	-0.82228	0.779629	ACPP	acid phosphatase, prostate
ILMN_20786	0.130351	0.00165	4.5056	-0.83258	1.23251	UBASH3B	ubiquitin associated and SH3 domain containing B
ILMN_2728	0.130351	0.00166	4.50204	-0.83734	1.1629	CDRT1	CMT1A duplicated region transcript 1
ILMN_14771	0.130351	0.00166	-4.50118	-0.8385	-1.05787	PMEPA1	prostate transmembrane protein, androgen induced 1
ILMN_24467	0.132784	0.0017	4.48519	-0.85992	1.1935	AGMAT	agmatinase
ILMN_1663	0.132928	0.00171	4.4813	-0.86514	1.10913	CDC25A	cell division cycle 25A
ILMN_784	0.132928	0.00172	4.47478	-0.87389	1.13022	RAB32	RAB32, member RAS oncogene family
ILMN_5537	0.132928	0.00172	4.47417	-0.87471	1.53649	ADAMDEC1	ADAM like decysin 1
ILMN_5343	0.132928	0.00172	4.47361	-0.87545	1.00231	IGFLR1	IGF like family receptor 1
ILMN_9209	0.13366	0.00174	-4.46701	-0.88432	-0.862887	KRT14	keratin 14
ILMN_2955	0.133772	0.00175	4.46322	-0.88941	1.05381	ESCO2	establishment of sister chromatid cohesion N-acetyltransferase 2
ILMN_14843	0.133772	0.00176	-4.4597	-0.89416	-0.910792	HHAT	hedgehog acyltransferase
ILMN_3632	0.133772	0.00177	4.45596	-0.89919	2.57838
ILMN_1073	0.133772	0.00177	4.45319	-0.90291	1.01892	MSTO1	misato 1, mitochondrial distribution and morphology regulator
ILMN_20475	0.133772	0.00178	-4.45148	-0.90522	-1.56393	CTSG	cathepsin G
ILMN_18676	0.133772	0.00178	4.4506	-0.9064	0.863221	FAM64A	family with sequence similarity 64 member A
ILMN_25010	0.133874	0.00179	-4.44699	-0.91126	-0.890747	UBL3	ubiquitin like 3
ILMN_7354	0.133874	0.0018	-4.44191	-0.91811	-1.30693	SYT17	synaptotagmin 17
ILMN_1491	0.133874	0.0018	4.44176	-0.91831	0.724105	C11orf80	chromosome 11 open reading frame 80
ILMN_22365	0.133874	0.00181	4.43818	-0.92315	1.22593	CARD9	caspase recruitment domain family member 9
ILMN_2859	0.133874	0.00181	4.43716	-0.92452	0.931879	PLEKHB1	pleckstrin homology domain containing B1
ILMN_11503	0.133989	0.00183	4.43221	-0.9312	1.18697	CDK1	cyclin dependent kinase 1
ILMN_2313	0.133989	0.00184	-4.42794	-0.93696	-0.817191	RCHY1	ring finger and CHY zinc finger domain containing 1
ILMN_27301	0.133989	0.00184	4.42764	-0.93736	0.843848	CACYBP	calcyclin binding protein
ILMN_3201	0.133989	0.00185	4.42483	-0.94115	0.803544	ACOT7	acyl-CoA thioesterase 7
ILMN_25584	0.133989	0.00185	-4.4239	-0.94241	-1.11491	LARP6	La ribonucleoprotein domain family member 6
ILMN_28293	0.134031	0.00186	-4.42118	-0.9461	-0.972883	HIST2H2BE	histone cluster 2, H2be
ILMN_1986	0.134044	0.00186	4.41862	-0.94956	1.39792	MCM7	minichromosome maintenance complex component 7
ILMN_6836	0.134932	0.00188	-4.41144	-0.95926	-0.777996	SATB1	SATB homeobox 1
ILMN_19572	0.134953	0.00189	4.40673	-0.96563	0.89963	PSME2	proteasome activator subunit 2
ILMN_9760	0.134953	0.00189	-4.40639	-0.96609	-0.837796	ZCRB1	zinc finger CCHC-type and RNA binding motif containing 1
ILMN_25243	0.135263	0.00191	4.40167	-0.97249	1.24938	ANO1	anoctamin 1
ILMN_1347	0.135263	0.00192	-4.39841	-0.97691	-1.20778	TMTC4	transmembrane and tetratricopeptide repeat containing 4
ILMN_11513	0.135263	0.00192	-4.39539	-0.981	-0.820519	SDPR	serum deprivation response
ILMN_3509	0.135263	0.00193	4.39198	-0.98562	1.05204
ILMN_16337	0.135263	0.00194	-4.38994	-0.98839	-0.892719	SNAPC1	small nuclear RNA activating complex polypeptide 1
ILMN_21581	0.135263	0.00195	-4.38614	-0.99355	-1.35731	RIMS3	regulating synaptic membrane exocytosis 3
ILMN_18124	0.135263	0.00195	4.38508	-0.99499	1.32047	C2orf82	chromosome 2 open reading frame 82
ILMN_23230	0.135263	0.00196	-4.38271	-0.9982	-0.779111	PPIL6	peptidylprolyl isomerase like 6
ILMN_13450	0.135263	0.00196	4.38154	-0.99978	0.827937	DTYMK	deoxythymidylate kinase
ILMN_21651	0.135263	0.00197	4.3803	-1.00147	1.13495	CEACAM1	carcinoembryonic antigen related cell adhesion molecule 1
ILMN_18906	0.135263	0.00197	4.37827	-1.00423	1.11006	CTPS1	CTP synthase 1
ILMN_26974	0.135283	0.00201	-4.36607	-1.02082	-0.98547	HSPB7	heat shock protein family B (small) member 7
ILMN_22805	0.135283	0.00202	-4.36193	-1.02645	-1.54071	SLC26A7	solute carrier family 26 member 7
ILMN_16811	0.135283	0.00202	-4.3597	-1.02948	-0.834426	PER1	period circadian clock 1
ILMN_25253	0.135283	0.00203	-4.35603	-1.03449	-0.831596
ILMN_2469	0.135283	0.00204	4.35505	-1.03581	1.13153	MICB	MHC class I polypeptide-related sequence B
ILMN_3441	0.135283	0.00204	4.35401	-1.03724	0.729397	ADRA2C	adrenoceptor alpha 2C
ILMN_1615	0.135283	0.00204	4.354	-1.03725	0.874172
ILMN_1673	0.135283	0.00205	-4.35059	-1.0419	-1.24098	ULBP1	UL16 binding protein 1
ILMN_23433	0.135283	0.00206	4.34696	-1.04684	1.21034	FPR1	formyl peptide receptor 1
ILMN_12182	0.135283	0.00206	-4.34568	-1.04858	-0.757705	FAM175A	family with sequence similarity 175 member A
ILMN_11928	0.135283	0.00207	-4.34276	-1.05257	-1.26765	ZFY	zinc finger protein, Y-linked
ILMN_21911	0.135283	0.00207	4.34275	-1.05258	1.35879	TYMSOS	TYMS opposite strand
ILMN_19816	0.135283	0.00207	4.3419	-1.05375	0.934878	HAPLN3	hyaluronan and proteoglycan link protein 3
ILMN_13859	0.135283	0.00208	-4.34174	-1.05397	-0.914938	FZD4	frizzled class receptor 4
ILMN_16725	0.135283	0.00208	4.33914	-1.05752	0.775773	DEPDC1B	DEP domain containing 1B
ILMN_9348	0.135283	0.00209	-4.33762	-1.05958	-0.89693	PNMA5	paraneoplastic Ma antigen family member 5
ILMN_136977	0.135283	0.00209	-4.33713	-1.06026	-1.02445	CYFIP2	cytoplasmic FMR1 interacting protein 2
ILMN_23783	0.135283	0.00209	-4.33698	-1.06046	-0.719767	GOLT1A	golgi transport 1A
ILMN_18310	0.135846	0.0021	4.33184	-1.06748	0.93827	CCL15	C-C motif chemokine ligand 15
ILMN_14424	0.13799	0.00215	4.31628	-1.08875	0.982968	HLA-DMA	major histocompatibility complex, class II, DM alpha
ILMN_29003	0.13799	0.00216	4.31521	-1.09022	0.725514	KCNN3	potassium calcium-activated channel subfamily N member 3
ILMN_10723	0.13799	0.00216	-4.31345	-1.09262	-0.917439	GAS6	growth arrest specific 6
ILMN_28888	0.13799	0.00216	-4.31204	-1.09456	-1.36433	TPSAB1	tryptase alpha/beta 1
ILMN_18682	0.138303	0.00218	4.3068	-1.10173	1.42415	ZC3H12A	zinc finger CCCH-type containing 12A
ILMN_30246	0.138303	0.00218	4.30563	-1.10333	0.875644	PPIL1	peptidylprolyl isomerase like 1
ILMN_18791	0.138303	0.0022	-4.30064	-1.11018	-1.04125	SOX6	SRY-box 6
ILMN_3929	0.138303	0.00221	4.29867	-1.11288	1.49656	GMPPB	GDP-mannose pyrophosphorylase B
ILMN_17296	0.138303	0.00221	4.29849	-1.11312	1.16853	SHCBP1	SHC binding and spindle associated 1
ILMN_24513	0.138303	0.00221	4.29653	-1.11581	0.999607	CCDC167	coiled-coil domain containing 167
ILMN_27092	0.138303	0.00222	4.29348	-1.11999	0.853361	GRHL3	grainyhead like transcription factor 3
ILMN_10665	0.138303	0.00223	4.29083	-1.12362	0.796505	CENPN	centromere protein N
ILMN_5239	0.138303	0.00224	-4.28959	-1.12533	-2.20889	FNDC5	fibronectin type III domain containing 5
ILMN_21833	0.138303	0.00224	-4.28803	-1.12748	-1.21628	SLC26A3	solute carrier family 26 member 3
ILMN_18041	0.138303	0.00224	4.28692	-1.129	0.770347	CENPH	centromere protein H
ILMN_11657	0.138394	0.00226	-4.28288	-1.13455	-0.870019	HPCAL1	hippocalcin like 1
ILMN_9456	0.138394	0.00227	4.27728	-1.14225	1.85916	PRRX2	paired related homeobox 2
ILMN_21186	0.138394	0.00228	-4.27689	-1.14277	-1.01644	ZSCAN4	zinc finger and SCAN domain containing 4
ILMN_1133	0.138394	0.00228	4.27581	-1.14426	0.947671	MCM7	minichromosome maintenance complex component 7
ILMN_15305	0.138394	0.00229	-4.274	-1.14675	-0.908071	ST6GALNAC2	ST6 N-acetylgalactosaminide alpha-2,6-sialyltransferase 2
ILMN_6052	0.138394	0.00229	4.27397	-1.14679	0.845201	CKMT1A	creatine kinase, mitochondrial 1A
ILMN_15104	0.138527	0.0023	4.26959	-1.15282	0.836103	MTFR2	mitochondrial fission regulator 2
ILMN_7643	0.138527	0.0023	-4.26919	-1.15336	-0.910007	UGT1A4	UDP glucuronosyltransferase family 1 member A4
ILMN_14098	0.141185	0.00235	4.25385	-1.1745	1.01597	NDC80	NDC80, kinetochore complex component
ILMN_13350	0.142624	0.00238	-4.24472	-1.18708	-1.07776	ZSCAN31	zinc finger and SCAN domain containing 31
ILMN_24131	0.14316	0.0024	4.24008	-1.1935	0.743953	CHAF1A	chromatin assembly factor 1 subunit A
ILMN_28655	0.14341	0.00241	4.23684	-1.19797	0.9591	TCTEX1D1	Tctex1 domain containing 1
ILMN_13561	0.14352	0.00242	-4.23265	-1.20376	-1.84789	RASD1	ras related dexamethasone induced 1
ILMN_3210	0.14352	0.00243	-4.23218	-1.2044	-0.87193	SMN2	survival of motor neuron 2, centromeric
ILMN_23253	0.14352	0.00243	4.23028	-1.20703	1.0599	ZWINT	ZW10 interacting kinetochore protein
ILMN_20479	0.144883	0.00247	-4.21979	-1.22153	-1.71793	SIGLEC11	sialic acid binding Ig like lectin 11
ILMN_8400	0.144883	0.00247	-4.21857	-1.22323	-0.705076
ILMN_21860	0.144883	0.00248	-4.21553	-1.22743	-0.778772	NPR3	natriuretic peptide receptor 3
ILMN_2416	0.144883	0.00249	-4.21479	-1.22846	-1.03231	GMPR	guanosine monophosphate reductase
ILMN_16900	0.144883	0.00249	4.21377	-1.22987	0.79857	HMMR	hyaluronan mediated motility receptor
ILMN_23434	0.145186	0.00251	4.2094	-1.23592	1.53587	TMPRSS3	transmembrane protease, serine 3
ILMN_4451	0.145186	0.00251	4.2084	-1.23731	1.64326	MNDA	myeloid cell nuclear differentiation antigen
ILMN_13740	0.145198	0.00252	4.20638	-1.2401	1.15858	MCM2	minichromosome maintenance complex component 2
ILMN_18130	0.14538	0.00253	4.20356	-1.24401	0.851588	SAMD5	sterile alpha motif domain containing 5
ILMN_16629	0.146353	0.00255	-4.19698	-1.25313	-2.04872	MT1X	metallothionein 1X
ILMN_8828	0.146657	0.00256	-4.19361	-1.25782	-0.851984	YPEL5	yippee like 5
ILMN_25007	0.147525	0.00259	-4.18759	-1.26618	-0.645057	RNF141	ring finger protein 141
ILMN_25352	0.148545	0.00262	4.1785	-1.27881	0.730584	FAM46D	family with sequence similarity 46 member D
ILMN_869	0.148545	0.00263	4.17596	-1.28233	0.830175	SKA3	spindle and kinetochore associated complex subunit 3
ILMN_16349	0.148545	0.00263	-4.17496	-1.28373	-0.695971	MAGI2	membrane associated guanylate kinase, WW and PDZ domain containing 2
ILMN_26024	0.148545	0.00265	-4.1709	-1.28938	-0.967215	FBXL14	F-box and leucine rich repeat protein 14
ILMN_2099	0.148545	0.00265	-4.17082	-1.28949	-0.831829	ST3GAL1	ST3 beta-galactoside alpha-2,3-sialyltransferase 1
ILMN_18909	0.148545	0.00266	4.16806	-1.29333	0.843812	CALR	calreticulin
ILMN_19976	0.148545	0.00266	4.16728	-1.29441	0.858867	DDX39A	DEAD-box helicase 39A
ILMN_3776	0.148545	0.00267	4.16567	-1.29665	0.829186	FBXO6	F-box protein 6
ILMN_17431	0.148545	0.00267	4.16463	-1.29811	0.783079	OR51D1	olfactory receptor family 51 subfamily D member 1
ILMN_408	0.148545	0.00268	4.16257	-1.30098	0.817933	ASPM	abnormal spindle microtubule assembly
ILMN_11724	0.148545	0.00269	-4.1602	-1.30427	-0.831101	GULP1	GULP, engulfment adaptor PTB domain containing 1
ILMN_11880	0.148545	0.00269	-4.16012	-1.30439	-1.05965
ILMN_22897	0.1486	0.0027	4.15801	-1.30733	0.894625
ILMN_26734	0.150907	0.00275	4.1455	-1.32478	0.788845	LRRC59	leucine rich repeat containing 59
ILMN_12639	0.15198	0.00278	4.13783	-1.33547	1.03667	SERHL2	serine hydrolase-like 2
ILMN_11067	0.15198	0.00279	4.13537	-1.33892	0.753828	PTTG1	pituitary tumor-transforming 1
ILMN_15997	0.15198	0.00279	-4.13426	-1.34046	-0.802347	COL9A1	collagen type IX alpha 1 chain
ILMN_20773	0.15198	0.00281	-4.13053	-1.34567	-0.934836	FGF12	fibroblast growth factor 12
ILMN_19114	0.15198	0.00281	-4.12927	-1.34744	-2.0067	DNER	delta/notch like EGF repeat containing
ILMN_3940	0.15198	0.00281	4.1291	-1.34767	0.838593	APOBEC2	apolipoprotein B mRNA editing enzyme catalytic subunit 2
ILMN_137434	0.15198	0.00285	4.12012	-1.36023	0.674698	KCNIP4	potassium voltage-gated channel interacting protein 4
ILMN_16949	0.15198	0.00285	4.11943	-1.3612	0.71573	DENND1C	DENN domain containing 1C
ILMN_6510	0.15198	0.00288	4.11442	-1.36821	1.55617	QPCT	glutaminyl-peptide cyclotransferase
ILMN_25241	0.15198	0.00288	4.11294	-1.37028	0.811048	MLKL	mixed lineage kinase domain like
ILMN_10596	0.15198	0.00288	-4.1121	-1.37147	-1.12166	ASPA	aspartoacylase
ILMN_12321	0.15198	0.00289	4.11021	-1.37411	0.685123	ABHD17B	abhydrolase domain containing 17B
ILMN_14281	0.15198	0.0029	4.10865	-1.37629	1.00785	NUSAP1	nucleolar and spindle associated protein 1
ILMN_3638	0.15198	0.0029	4.10826	-1.37685	0.806547	SEMA3F	semaphorin 3F
ILMN_20484	0.15198	0.00291	4.10518	-1.38116	0.969656	RNASEH2A	ribonuclease H2 subunit A
ILMN_2391	0.15198	0.00291	4.10498	-1.38144	0.82298	GGCT	gamma-glutamylcyclotransferase
ILMN_13650	0.15198	0.00292	4.10433	-1.38235	0.832227	GMPPA	GDP-mannose pyrophosphorylase A
ILMN_11390	0.15198	0.00292	-4.10334	-1.38374	-0.694248	RANBP3L	RAN binding protein 3 like
ILMN_22651	0.15198	0.00293	4.10239	-1.38507	0.739765	KRT18	keratin 18
ILMN_23106	0.15198	0.00293	-4.10069	-1.38745	-1.14377	ACSS1	acyl-CoA synthetase short-chain family member 1
ILMN_1952	0.15198	0.00293	-4.10025	-1.38807	-0.732505	FAM174A	family with sequence similarity 174 member A
ILMN_15946	0.15198	0.00294	4.09975	-1.38878	0.746836	NCKIPSD	NCK interacting protein with SH3 domain
ILMN_27127	0.15198	0.00294	4.09952	-1.38909	0.837371	OR5H1	olfactory receptor family 5 subfamily H member 1
ILMN_9550	0.152441	0.00295	4.09571	-1.39444	2.11111	JSRP1	junctional sarcoplasmic reticulum protein 1
ILMN_26537	0.153695	0.00299	-4.08835	-1.40477	-0.974647	PPP1R36	protein phosphatase 1 regulatory subunit 36
ILMN_11182	0.155145	0.00302	-4.07949	-1.41722	-1.54021	FGA	fibrinogen alpha chain
ILMN_8975	0.155145	0.00303	4.07828	-1.41892	1.16008	GRID2	glutamate ionotropic receptor delta type subunit 2
ILMN_23294	0.155145	0.00304	4.07676	-1.42106	0.803508	RNF213	ring finger protein 213
ILMN_14100	0.155552	0.00305	4.07322	-1.42604	0.82566	KIF20A	kinesin family member 20A
ILMN_18812	0.155552	0.00307	4.06826	-1.43301	0.704408	MB21D1	Mab-21 domain containing 1
ILMN_20584	0.155552	0.00307	4.06817	-1.43314	1.00199	CDC7	cell division cycle 7
ILMN_16870	0.155552	0.00308	4.06596	-1.43625	0.844921	RFC4	replication factor C subunit 4
ILMN_1956	0.155552	0.0031	4.06246	-1.44118	2.20936	GBP6	guanylate binding protein family member 6
ILMN_18096	0.155552	0.0031	4.06232	-1.44138	0.861886	COL22A1	collagen type XXII alpha 1 chain
ILMN_138416	0.155552	0.0031	-4.06192	-1.44193	-0.664281	HOXD10	homeobox D10
ILMN_15907	0.155552	0.00311	4.06147	-1.44258	0.652205	HSD3B7	hydroxy-delta-5-steroid dehydrogenase, 3 beta- and steroid delta-isomerase 7
ILMN_7723	0.156405	0.00313	-4.05498	-1.45172	-0.930083	ANAPC16	anaphase promoting complex subunit 16
ILMN_24725	0.156405	0.00314	4.05438	-1.45256	1.2122	E2F8	E2F transcription factor 8
ILMN_29514	0.156521	0.00316	-4.05019	-1.45848	-0.932179	ADM	adrenomedullin
ILMN_12756	0.156521	0.00316	4.04922	-1.45983	1.10752	KIRREL	kin of IRRE like (Drosophila)
ILMN_6865	0.156521	0.00316	4.04889	-1.46031	1.18069	TEAD4	TEA domain transcription factor 4
ILMN_437	0.156521	0.00317	4.04623	-1.46406	1.00201	TAP2	transporter 2, ATP binding cassette subfamily B member
ILMN_915	0.156521	0.00319	4.04319	-1.46834	0.919146	SPC25	SPC25, NDC80 kinetochore complex component
ILMN_11770	0.156521	0.00319	4.04256	-1.46923	0.961935	GPT	glutamic--pyruvic transaminase
ILMN_22298	0.156521	0.0032	4.04013	-1.47267	1.17182	KCNE3	potassium voltage-gated channel subfamily E regulatory subunit 3
ILMN_13686	0.156521	0.00321	-4.03929	-1.47384	-1.32854	MAST4	microtubule associated serine/threonine kinase family member 4
ILMN_22086	0.156521	0.00321	4.03899	-1.47427	1.91149
ILMN_18195	0.156521	0.00322	4.03749	-1.47639	1.34217	CYP4F2	cytochrome P450 family 4 subfamily F member 2
ILMN_11144	0.157396	0.00324	4.03206	-1.48406	1.02735	MCUB	mitochondrial calcium uniporter dominant negative beta subunit
ILMN_9763	0.158314	0.00327	4.02647	-1.49196	0.88656	FBXO5	F-box protein 5
ILMN_21378	0.158415	0.00328	-4.02443	-1.49484	-0.771673
ILMN_11069	0.158462	0.00329	-4.02131	-1.49925	-0.869968	ENTPD8	ectonucleoside triphosphate diphosphohydrolase 8
ILMN_19665	0.158462	0.0033	4.02055	-1.50033	1.1422	CES2	carboxylesterase 2
ILMN_2438	0.158462	0.0033	-4.01943	-1.50191	-0.837978	FAM19A2	family with sequence similarity 19 member A2, C-C motif chemokine like
ILMN_23109	0.158598	0.00331	4.01686	-1.50556	0.731311	SPATA33	spermatogenesis associated 33
ILMN_14206	0.158598	0.00332	4.01566	-1.50724	0.833005	KPNA2	karyopherin subunit alpha 2
ILMN_20896	0.158983	0.00334	4.01243	-1.51182	0.730435	EZH2	enhancer of zeste 2 polycomb repressive complex 2 subunit
ILMN_16552	0.159394	0.00335	4.00908	-1.51656	1.06296	TNFRSF11A	TNF receptor superfamily member 11a
ILMN_1665	0.159696	0.00338	4.00339	-1.52463	0.906461	KCTD17	potassium channel tetramerization domain containing 17
ILMN_26647	0.159696	0.00339	-4.00061	-1.52857	-0.718524	YPEL1	yippee like 1
ILMN_3953	0.159696	0.0034	-4.0004	-1.52887	-0.72321	UBTD1	ubiquitin domain containing 1
ILMN_138348	0.159696	0.0034	3.99932	-1.53039	0.675956	ACSBG2	acyl-CoA synthetase bubblegum family member 2
ILMN_3980	0.159696	0.0034	3.99859	-1.53142	1.19327	TDRD10	tudor domain containing 10
ILMN_12273	0.159696	0.00341	-3.99841	-1.53169	-1.00565	SLITRK4	SLIT and NTRK like family member 4
ILMN_26343	0.160507	0.00343	3.9934	-1.53878	1.57665	GJB2	gap junction protein beta 2
ILMN_3834	0.160998	0.00345	3.98978	-1.54393	0.726204	DSN1	DSN1 homolog, MIS12 kinetochore complex component
ILMN_8258	0.161457	0.00347	-3.98629	-1.54887	-0.861239	KIT	KIT proto-oncogene receptor tyrosine kinase
ILMN_11113	0.16147	0.00348	3.98454	-1.55137	0.90887	LRR1	leucine rich repeat protein 1
ILMN_12966	0.16147	0.00348	-3.98316	-1.55332	-1.23895	GHR	growth hormone receptor
ILMN_10299	0.161801	0.0035	3.98024	-1.55747	0.919962	KIAA1524	KIAA1524
ILMN_9224	0.161942	0.00352	-3.97668	-1.56252	-1.08759	IDH2	isocitrate dehydrogenase (NADP(+)) 2, mitochondrial
ILMN_137089	0.161942	0.00352	3.97659	-1.56265	0.804198	PRR11	proline rich 11
ILMN_4322	0.161952	0.00352	-3.97503	-1.56487	-0.838731	KANK1	KN motif and ankyrin repeat domains 1
ILMN_25553	0.162162	0.00354	3.97192	-1.56929	0.717881	MCM3	minichromosome maintenance complex component 3
ILMN_9440	0.162162	0.00354	3.97112	-1.57043	0.834858	GAGE4	G antigen 4
ILMN_5340	0.163058	0.00357	3.96586	-1.57791	0.699248	FBXL6	F-box and leucine rich repeat protein 6
ILMN_27636	0.16311	0.00358	-3.96414	-1.58036	-0.768787	BRI3	brain protein I3
ILMN_137102	0.163612	0.0036	3.96055	-1.58546	0.801135
ILMN_29177	0.163828	0.00361	3.95785	-1.58931	0.791572	TRIM5	tripartite motif containing 5
ILMN_16135	0.163828	0.00362	3.95666	-1.591	0.991674	SLC16A3	solute carrier family 16 member 3
ILMN_23985	0.164911	0.00365	3.9507	-1.5995	0.928622	MAD2L1	MAD2 mitotic arrest deficient-like 1 (yeast)
ILMN_29899	0.165327	0.00367	3.9475	-1.60405	1.93005	MYBPC1	myosin binding protein C, slow type
ILMN_4315	0.165745	0.00369	3.94379	-1.60934	1.23051	RAD51	RAD51 recombinase
ILMN_11481	0.165745	0.0037	-3.94283	-1.61072	-1.0224	ARHGEF10	Rho guanine nucleotide exchange factor 10
ILMN_8731	0.16603	0.00371	3.93985	-1.61496	0.726858	STAB2	stabilin 2
ILMN_11686	0.16603	0.00372	3.93872	-1.61658	1.02936	TNFAIP6	TNF alpha induced protein 6
ILMN_21428	0.166041	0.00374	-3.93536	-1.62137	-1.57817	G0S2	G0/G1 switch 2
ILMN_4248	0.166041	0.00375	3.93339	-1.62418	0.724298	GP6	glycoprotein VI platelet
ILMN_5437	0.166041	0.00375	3.93335	-1.62423	0.675668	CD28	CD28 molecule
ILMN_8346	0.166041	0.00375	3.93281	-1.62501	0.788309	KNL1	kinetochore scaffold 1
ILMN_26285	0.166848	0.00378	-3.92807	-1.63177	-0.630011	VAT1	vesicle amine transport 1
ILMN_2257	0.167602	0.0038	3.92357	-1.63821	1.29152	UNC5CL	unc-5 family C-terminal like
ILMN_22929	0.168398	0.00383	3.91892	-1.64486	0.846923	MIS18A	MIS18 kinetochore protein A
ILMN_4649	0.169069	0.00385	-3.91478	-1.65078	-0.929919	CYBRD1	cytochrome b reductase 1
ILMN_6174	0.169553	0.00388	3.90998	-1.65764	1.53553	ISG15	ISG15 ubiquitin-like modifier
ILMN_8503	0.169553	0.00389	3.90864	-1.65956	0.803077	KIF11	kinesin family member 11
ILMN_15862	0.169553	0.00389	-3.90853	-1.65971	-0.709446	VEGFB	vascular endothelial growth factor B
ILMN_6370	0.169615	0.0039	3.9066	-1.66248	0.726392	PAX7	paired box 7
ILMN_15202	0.169615	0.0039	3.90543	-1.66415	0.972372	XAGE3	X antigen family member 3
ILMN_25671	0.169871	0.00392	3.90298	-1.66765	2.15263	DUOXA2	dual oxidase maturation factor 2
ILMN_1304	0.170528	0.00394	-3.89893	-1.67345	-0.835382	ARRB2	arrestin beta 2
ILMN_19566	0.170528	0.00395	-3.89754	-1.67545	-0.789167	SERF1B	small EDRK-rich factor 1B
ILMN_24280	0.170847	0.00397	-3.89486	-1.67929	-0.698672	MDP1	magnesium dependent phosphatase 1
ILMN_25582	0.171482	0.00399	3.89095	-1.6849	0.730398	DEPDC1	DEP domain containing 1
ILMN_8009	0.172253	0.00402	3.88651	-1.69125	0.656701	LIG1	DNA ligase 1
ILMN_25508	0.172341	0.00403	3.88477	-1.69376	0.680361	ARL9	ADP ribosylation factor like GTPase 9
ILMN_8970	0.172375	0.00404	-3.88258	-1.69689	-2.20265	ALDOB	aldolase, fructose-bisphosphate B
ILMN_1748	0.172375	0.00405	3.88147	-1.69849	0.679432	PSRC1	proline and serine rich coiled-coil 1
ILMN_11899	0.172375	0.00405	-3.88044	-1.69997	-0.918464	OXCT1	3-oxoacid CoA-transferase 1
ILMN_16808	0.175154	0.00413	3.86704	-1.71922	0.88432	NUF2	NUF2, NDC80 kinetochore complex component
ILMN_9037	0.175154	0.00413	-3.86688	-1.71944	-0.839487	NNT	nicotinamide nucleotide transhydrogenase
ILMN_3857	0.175623	0.00415	-3.8637	-1.72401	-0.90036	GDE1	glycerophosphodiester phosphodiesterase 1
ILMN_15362	0.179035	0.00425	3.84819	-1.74633	0.691171	SLF1	SMC5-SMC6 complex localization factor 1
ILMN_928	0.179035	0.00427	3.8458	-1.74977	0.801784	HIST1H4G	histone cluster 1, H4g
ILMN_24810	0.179035	0.00427	-3.84566	-1.74996	-0.766308	ANO3	anoctamin 3
ILMN_22180	0.179035	0.00427	3.84525	-1.75055	0.775215	NME1	NME/NM23 nucleoside diphosphate kinase 1
ILMN_4623	0.180051	0.0043	3.84008	-1.758	1.85267	MYEOV	myeloma overexpressed
ILMN_24016	0.180309	0.00432	-3.83687	-1.76262	-0.913472	CCL14	C-C motif chemokine ligand 14
ILMN_18673	0.180309	0.00433	3.83511	-1.76516	0.677367	LY6E	lymphocyte antigen 6 complex, locus E
ILMN_138605	0.180309	0.00433	-3.83504	-1.76527	-0.696783	LONRF1	LON peptidase N-terminal domain and ring finger 1
ILMN_13460	0.180604	0.00435	-3.83259	-1.7688	-1.63128	VANGL2	VANGL planar cell polarity protein 2
ILMN_6945	0.181293	0.00438	3.82744	-1.77622	0.898313	CYBA	cytochrome b-245 alpha chain
ILMN_21621	0.181293	0.00439	-3.82728	-1.77645	-0.952904	ENAM	enamelin
ILMN_15503	0.181293	0.00439	-3.82598	-1.77832	-1.23094	SCARA5	scavenger receptor class A member 5
ILMN_23678	0.181644	0.00441	3.82334	-1.78214	0.804806	OR5P3	olfactory receptor family 5 subfamily P member 3
ILMN_19523	0.18166	0.00442	3.82194	-1.78415	1.39997	ITGA8	integrin subunit alpha 8
ILMN_6723	0.182801	0.00446	3.81641	-1.79214	0.975138	FCN3	ficolin 3
ILMN_19964	0.182823	0.00447	-3.8149	-1.79432	-1.63358	SLC2A12	solute carrier family 2 member 12
ILMN_15154	0.182823	0.00448	3.81366	-1.79611	0.865031	OSMR	oncostatin M receptor
ILMN_28334	0.182924	0.00449	3.81138	-1.7994	0.928677	C18orf54	chromosome 18 open reading frame 54
ILMN_27748	0.182924	0.0045	-3.80938	-1.8023	-0.759573	ENPP4	ectonucleotide pyrophosphatase/phosphodiesterase 4 (putative)
ILMN_10870	0.182924	0.0045	-3.80932	-1.80239	-0.65031	ARHGAP31	Rho GTPase activating protein 31
ILMN_16032	0.183113	0.00452	-3.8073	-1.8053	-1.16193	KCNMB2	potassium calcium-activated channel subfamily M regulatory beta subunit 2
ILMN_11932	0.183604	0.00454	-3.80419	-1.80979	-0.796844	SLITRK5	SLIT and NTRK like family member 5
ILMN_24337	0.184072	0.00456	3.80118	-1.81416	0.949296	VNN2	vanin 2
ILMN_19705	0.18424	0.00457	3.79925	-1.81694	1.06623	POLE2	DNA polymerase epsilon 2, accessory subunit
ILMN_13130	0.185037	0.0046	3.79506	-1.82301	1.35004	DONSON	downstream neighbor of SON
ILMN_18898	0.185108	0.00461	3.79349	-1.82527	0.99066	MUC20	mucin 20, cell surface associated
ILMN_26198	0.185474	0.00463	3.79024	-1.82999	0.848697	ENTPD7	ectonucleoside triphosphate diphosphohydrolase 7
ILMN_29022	0.185474	0.00464	-3.78957	-1.83095	-0.702715	CERS4	ceramide synthase 4
ILMN_15016	0.185744	0.00466	-3.78702	-1.83464	-0.869781	REXO2	RNA exonuclease 2
ILMN_21714	0.185744	0.00467	3.7854	-1.83699	0.854576	RNFT2	ring finger protein, transmembrane 2
ILMN_5832	0.185744	0.00467	3.78472	-1.83798	0.61854	STAC	SH3 and cysteine rich domain
ILMN_15759	0.18619	0.00469	3.78182	-1.84217	0.903574
ILMN_599	0.186814	0.00472	-3.7783	-1.84727	-0.819563	CCDC115	coiled-coil domain containing 115
ILMN_25678	0.186952	0.00474	-3.77514	-1.85186	-0.781217	TACC2	transforming acidic coiled-coil containing protein 2
ILMN_29562	0.186952	0.00475	-3.77444	-1.85287	-0.623829	PTPN4	protein tyrosine phosphatase, non-receptor type 4
ILMN_14464	0.186952	0.00475	3.77397	-1.85356	1.08011	SGO1	shugoshin 1
ILMN_23147	0.187411	0.00477	-3.77106	-1.85778	-0.924348	SLC26A7	solute carrier family 26 member 7
ILMN_7314	0.187861	0.00479	3.76818	-1.86194	1.34975	HLA-DRA	major histocompatibility complex, class II, DR alpha
ILMN_17186	0.188068	0.00481	3.76593	-1.86521	0.742746	CALML4	calmodulin like 4
ILMN_23104	0.188068	0.00481	-3.76491	-1.86669	-0.855509	ZNF69	zinc finger protein 69
ILMN_13120	0.188194	0.00483	-3.7632	-1.86918	-0.731324	CYSRT1	cysteine rich tail 1
ILMN_13755	0.188301	0.00486	3.75863	-1.87581	2.87739	CLDN7	claudin 7
ILMN_16792	0.188301	0.00488	3.75592	-1.87975	0.96737	PROK2	prokineticin 2
ILMN_21866	0.188301	0.00489	3.755	-1.88108	2.02219	CEACAM6	carcinoembryonic antigen related cell adhesion molecule 6
ILMN_8630	0.188301	0.00489	-3.75486	-1.88129	-0.699413	CUX1	cut like homeobox 1
ILMN_16785	0.188301	0.00489	3.75468	-1.88155	1.27909	AK1	adenylate kinase 1
ILMN_24281	0.188301	0.0049	-3.7525	-1.88471	-1.7774	CIART	circadian associated repressor of transcription
ILMN_23623	0.188301	0.00491	3.75226	-1.88506	0.636177	HSD17B4	hydroxysteroid 17-beta dehydrogenase 4
ILMN_8954	0.188301	0.00492	3.75039	-1.88777	1.10615	UGT1A6	UDP glucuronosyltransferase family 1 member A6
ILMN_20827	0.188301	0.00495	3.74696	-1.89276	0.811035	ATL3	atlastin GTPase 3
ILMN_17950	0.188301	0.00495	3.74609	-1.89402	1.02166	C17orf53	chromosome 17 open reading frame 53
ILMN_28369	0.188301	0.00496	-3.74517	-1.89537	-0.877586	DCAF4L1	DDB1 and CUL4 associated factor 4 like 1
ILMN_5127	0.188301	0.00497	-3.74423	-1.89673	-0.698548
ILMN_9687	0.188301	0.00497	3.74412	-1.89689	1.04085	F13A1	coagulation factor XIII A chain
ILMN_20456	0.188301	0.00497	3.7439	-1.89722	1.03386	CORO2A	coronin 2A
ILMN_26929	0.188301	0.00497	3.74359	-1.89767	0.876463	ADCY3	adenylate cyclase 3
ILMN_10156	0.188301	0.005	3.73996	-1.90294	0.649921
ILMN_3481	0.188301	0.00501	3.73848	-1.9051	0.807998	WDR4	WD repeat domain 4
ILMN_6146	0.188301	0.00502	-3.73749	-1.90654	-1.03674	BGN	biglycan
ILMN_3845	0.188301	0.00502	-3.73686	-1.90746	-1.11672	ANKRD16	ankyrin repeat domain 16
ILMN_27502	0.188301	0.00504	-3.73392	-1.91174	-0.603543
ILMN_8047	0.188301	0.00506	-3.73116	-1.91575	-0.632663	RPGRIP1L	RPGRIP1 like
ILMN_4293	0.188301	0.00507	3.72996	-1.9175	0.625354	VWA1	von Willebrand factor A domain containing 1
ILMN_8981	0.188301	0.00508	-3.72847	-1.91966	-0.665292	GNG11	G protein subunit gamma 11
ILMN_9893	0.188301	0.00509	-3.72826	-1.91997	-0.609236	TSC22D3	TSC22 domain family member 3
ILMN_9603	0.188301	0.00509	-3.72768	-1.92081	-1.18504	C3orf18	chromosome 3 open reading frame 18
ILMN_2816	0.188301	0.00511	-3.72508	-1.92461	-0.784128	HLCS	holocarboxylase synthetase
ILMN_13833	0.188301	0.00511	-3.72469	-1.92516	-0.995886	WFDC13	WAP four-disulfide core domain 13
ILMN_20265	0.188301	0.00512	3.72442	-1.92556	0.949869	TCTE3	t-complex-associated-testis-expressed 3
ILMN_29402	0.188301	0.00512	-3.72379	-1.92648	-0.626706	FGA	fibrinogen alpha chain
ILMN_138148	0.188301	0.00513	-3.72281	-1.9279	-0.841864	CTSF	cathepsin F
ILMN_18172	0.188301	0.00513	3.72258	-1.92824	1.47361	HLA-DRB4	major histocompatibility complex, class II, DR beta 4
ILMN_17583	0.188301	0.00513	-3.72218	-1.92882	-0.696535	TSGA10	testis specific 10
ILMN_16053	0.188301	0.00513	-3.72211	-1.92893	-1.07286	AUH	AU RNA binding methylglutaconyl-CoA hydratase
ILMN_778	0.188301	0.00515	-3.7202	-1.93171	-0.907868	PTPRN2	protein tyrosine phosphatase, receptor type N2
ILMN_8741	0.188301	0.00515	3.72009	-1.93187	1.16016	FCGR3B	Fc fragment of IgG receptor IIIb
ILMN_138252	0.189167	0.00518	3.71586	-1.93803	0.622979	SNRPF	small nuclear ribonucleoprotein polypeptide F
ILMN_6820	0.189598	0.00521	-3.71191	-1.9438	-0.832102
ILMN_6930	0.189598	0.00522	3.7114	-1.94454	0.83171	NMUR2	neuromedin U receptor 2
ILMN_20882	0.189598	0.00522	3.71082	-1.94538	0.638452	ATP8B4	ATPase phospholipid transporting 8B4 (putative)
ILMN_12022	0.189821	0.00524	3.70887	-1.94822	0.631407	KIF20B	kinesin family member 20B
ILMN_6275	0.190704	0.00527	3.70462	-1.95442	0.641305	PSIP1	PC4 and SFRS1 interacting protein 1
ILMN_21247	0.191798	0.00531	-3.69967	-1.96166	-0.596646	IQSEC1	IQ motif and Sec7 domain 1
ILMN_26884	0.191924	0.00532	3.69779	-1.9644	0.859259
ILMN_25612	0.191924	0.00535	3.69503	-1.96843	0.668258	KIF24	kinesin family member 24
ILMN_19561	0.191924	0.00535	3.69483	-1.96872	0.69516	TCF19	transcription factor 19
ILMN_2655	0.191924	0.00535	3.69417	-1.96968	0.571132
ILMN_12916	0.191924	0.00537	-3.69214	-1.97265	-0.670449	PDCD4	programmed cell death 4 (neoplastic transformation inhibitor)
ILMN_17792	0.191924	0.00538	3.69138	-1.97376	0.83817	AIF1	allograft inflammatory factor 1
ILMN_15502	0.191924	0.0054	3.68872	-1.97764	0.890143	S100A10	S100 calcium binding protein A10
ILMN_21864	0.191924	0.0054	3.68792	-1.97882	0.771174	LST1	leukocyte specific transcript 1
ILMN_26225	0.191924	0.00542	-3.68655	-1.98081	-0.642808	FAM168B	family with sequence similarity 168 member B
ILMN_11846	0.191924	0.00542	3.68599	-1.98163	0.833419	RFC3	replication factor C subunit 3
ILMN_2451	0.191924	0.00544	-3.68383	-1.98479	-0.832612	SGK1	serum/glucocorticoid regulated kinase 1
ILMN_7704	0.191924	0.00544	3.68351	-1.98526	1.43624	IDO1	indoleamine 2,3-dioxygenase 1
ILMN_4054	0.191924	0.00545	-3.68279	-1.98631	-0.777622	CLUL1	clusterin like 1
ILMN_12948	0.191924	0.00545	3.68183	-1.98772	0.721131
ILMN_27570	0.191924	0.00547	3.67991	-1.99052	0.699087	C5AR1	complement component 5a receptor 1
ILMN_13405	0.191924	0.00548	-3.67845	-1.99265	-1.09101	RAP1GAP	RAP1 GTPase activating protein
ILMN_27274	0.191924	0.00548	-3.67838	-1.99275	-0.894489	MEX3D	mex-3 RNA binding family member D
ILMN_1964	0.191924	0.00549	-3.67746	-1.9941	-0.617271	PACSIN1	protein kinase C and casein kinase substrate in neurons 1
ILMN_25858	0.191924	0.0055	3.67673	-1.99518	1.13055	GPR39	G protein-coupled receptor 39
ILMN_4965	0.191924	0.0055	3.67581	-1.99652	0.705402	CEP135	centrosomal protein 135
ILMN_16471	0.191924	0.00552	-3.67428	-1.99876	-1.58643	ATP4A	ATPase H+/K+ transporting alpha subunit
ILMN_27164	0.191924	0.00554	-3.67134	-2.00307	-0.634936	SEPP1	selenoprotein P, plasma, 1
ILMN_22373	0.191924	0.00556	-3.66934	-2.00598	-1.00315
ILMN_21418	0.191924	0.00556	3.66922	-2.00617	0.844189	THOP1	thimet oligopeptidase 1
ILMN_15891	0.191924	0.00556	-3.66911	-2.00633	-1.84115	GSTM1	glutathione S-transferase mu 1
ILMN_8442	0.191924	0.00556	3.66895	-2.00656	0.587966	OR5K4	olfactory receptor family 5 subfamily K member 4
ILMN_137048	0.191924	0.00557	3.66797	-2.008	0.907399	HNRNPA1	heterogeneous nuclear ribonucleoprotein A1
ILMN_21421	0.191924	0.00557	-3.66746	-2.00873	-1.21137	TBC1D14	TBC1 domain family member 14
ILMN_13462	0.191955	0.0056	3.66404	-2.01375	0.75921	CDCA8	cell division cycle associated 8
ILMN_1501	0.191955	0.00562	-3.66255	-2.01594	-1.40176	HEPACAM2	HEPACAM family member 2
ILMN_14901	0.191955	0.00562	3.66214	-2.01653	1.40589	LILRB3	leukocyte immunoglobulin like receptor B3
ILMN_12238	0.191955	0.00563	3.66125	-2.01783	1.12151	RARRES1	retinoic acid receptor responder 1
ILMN_2930	0.191955	0.00565	3.65903	-2.02109	0.756241	BCL2L12	BCL2 like 12
ILMN_138334	0.191955	0.00565	-3.65843	-2.02197	-0.920912	GADD45B	growth arrest and DNA damage inducible beta
ILMN_10875	0.191955	0.00566	-3.65708	-2.02394	-1.04929	TMEM80	transmembrane protein 80
ILMN_3778	0.191955	0.00567	3.65641	-2.02493	0.799411	BCL2L15	BCL2 like 15
ILMN_8101	0.191955	0.00567	-3.65627	-2.02513	-0.678539	CD46	CD46 molecule
ILMN_3433	0.191955	0.0057	-3.65292	-2.03003	-0.741528	DPY19L4	dpy-19 like 4 (C. elegans)
ILMN_8681	0.191955	0.00571	-3.65198	-2.03142	-0.703109	KIAA1211L	KIAA1211 like
ILMN_21370	0.191955	0.00571	-3.65122	-2.03254	-1.57015	MT1F	metallothionein 1F
ILMN_24472	0.191955	0.00571	3.65108	-2.03273	0.647379	TTK	TTK protein kinase
ILMN_24305	0.191955	0.00574	3.64856	-2.03643	0.566895	FAM170A	family with sequence similarity 170 member A
ILMN_14352	0.191955	0.00574	-3.64763	-2.0378	-1.63494	KCNJ13	potassium voltage-gated channel subfamily J member 13
ILMN_2200	0.191955	0.00575	-3.64697	-2.03877	-0.642999
ILMN_3636	0.191955	0.00577	-3.6447	-2.04209	-0.668322	TNNC1	troponin C1, slow skeletal and cardiac type
ILMN_1914	0.191955	0.00577	3.64446	-2.04245	0.802691	DGKA	diacylglycerol kinase alpha
ILMN_28194	0.191955	0.00578	-3.64395	-2.04319	-1.09425	TMPRSS6	transmembrane protease, serine 6
ILMN_4510	0.191955	0.00578	3.64348	-2.04388	0.972293	PKD2L1	polycystin 2 like 1, transient receptor potential cation channel
ILMN_9502	0.191955	0.00579	3.64247	-2.04537	1.1903	GDPD3	glycerophosphodiester phosphodiesterase domain containing 3
ILMN_15204	0.191955	0.00579	3.64226	-2.04568	0.662034
ILMN_13842	0.191955	0.00579	-3.64222	-2.04573	-0.663022	BNIP3L	BCL2 interacting protein 3 like
ILMN_17551	0.191955	0.0058	3.64136	-2.047	0.720009	FFAR4	free fatty acid receptor 4
ILMN_8864	0.192114	0.00581	3.63975	-2.04935	1.07663	POLA2	DNA polymerase alpha 2, accessory subunit
ILMN_16321	0.192761	0.00584	3.63647	-2.05417	0.731894	HCK	HCK proto-oncogene, Src family tyrosine kinase
ILMN_18899	0.193513	0.00587	-3.63285	-2.05948	-0.604976	VMO1	vitelline membrane outer layer 1 homolog
ILMN_13040	0.194484	0.00592	3.62823	-2.06628	1.26574	GNL3	G protein nucleolar 3
ILMN_4661	0.194484	0.00592	-3.62744	-2.06743	-1.32566	BCKDHB	branched chain keto acid dehydrogenase E1 subunit beta
ILMN_8744	0.194486	0.00593	-3.62638	-2.06898	-0.875762	CREBRF	CREB3 regulatory factor
ILMN_16711	0.195195	0.00596	3.62294	-2.07405	1.66599	DUOX2	dual oxidase 2
ILMN_18200	0.196537	0.00602	3.61698	-2.0828	0.837489	OIP5	Opa interacting protein 5
ILMN_10463	0.196537	0.00602	-3.61633	-2.08376	-0.591953	HSPA12B	heat shock protein family A (Hsp70) member 12B
ILMN_7993	0.196551	0.00603	3.61506	-2.08563	1.00728	IL4I1	interleukin 4 induced 1
ILMN_4883	0.196551	0.00604	3.6142	-2.08689	0.711341	EPHB2	EPH receptor B2
ILMN_6350	0.196694	0.00607	-3.61108	-2.09149	-0.679742	WDR37	WD repeat domain 37
ILMN_1192	0.196694	0.00608	3.61002	-2.09304	0.566044	FAM57B	family with sequence similarity 57 member B
ILMN_12131	0.196694	0.00609	-3.60881	-2.09482	-0.58458	SPRED2	sprouty related EVH1 domain containing 2
ILMN_4487	0.196694	0.00609	3.60861	-2.09512	0.594192	PPP1R3C	protein phosphatase 1 regulatory subunit 3C
ILMN_7611	0.196694	0.00611	-3.60649	-2.09823	-0.857308	PCDHB12	protocadherin beta 12
ILMN_23668	0.196694	0.00612	-3.60618	-2.09869	-0.565154	POLR3GL	RNA polymerase III subunit G like
ILMN_19172	0.196694	0.00612	-3.60552	-2.09966	-1.07797	PXMP2	peroxisomal membrane protein 2
ILMN_5806	0.196694	0.00612	-3.60544	-2.09978	-0.588666	CMTM4	CKLF like MARVEL transmembrane domain containing 4
ILMN_13241	0.196694	0.00613	3.60443	-2.10126	0.976808
ILMN_23674	0.196732	0.00614	-3.60328	-2.10296	-0.679976	ZFAND1	zinc finger AN1-type containing 1
ILMN_14815	0.197025	0.00616	-3.60128	-2.10591	-1.09045	SLC1A1	solute carrier family 1 member 1
ILMN_7827	0.197131	0.0062	3.59743	-2.11158	0.885453	SELP	selectin P
ILMN_16506	0.197131	0.0062	3.59727	-2.11181	0.580165	UBA6	ubiquitin like modifier activating enzyme 6
ILMN_2636	0.197131	0.00621	-3.59673	-2.1126	-0.699413	DCAF4	DDB1 and CUL4 associated factor 4
ILMN_11662	0.197131	0.00622	-3.59569	-2.11414	-1.12636	ENPP5	ectonucleotide pyrophosphatase/phosphodiesterase 5 (putative)
ILMN_8430	0.197131	0.00622	-3.5949	-2.11531	-0.63019	ABCA5	ATP binding cassette subfamily A member 5
ILMN_22862	0.197131	0.00623	-3.59393	-2.11673	-1.25115	DKK1	dickkopf WNT signaling pathway inhibitor 1
ILMN_11388	0.197131	0.00623	-3.59381	-2.1169	-0.941374	UNC5A	unc-5 netrin receptor A
ILMN_28153	0.197343	0.00625	-3.5921	-2.11942	-0.961985	DEAF1	DEAF1, transcription factor
ILMN_7186	0.197347	0.00627	-3.59044	-2.12187	-1.13569	RAPGEF4	Rap guanine nucleotide exchange factor 4
ILMN_23719	0.197347	0.00629	-3.58831	-2.12501	-0.684918	CSDC2	cold shock domain containing C2
ILMN_3588	0.197347	0.00629	-3.5882	-2.12517	-0.651634	GPAM	glycerol-3-phosphate acyltransferase, mitochondrial
ILMN_137237	0.197347	0.00629	-3.58751	-2.12618	-1.12044	PDZD2	PDZ domain containing 2
ILMN_28897	0.197347	0.0063	-3.587	-2.12694	-0.633466	PHC2	polyhomeotic homolog 2
ILMN_27771	0.197347	0.00631	-3.58607	-2.12831	-0.894517	CHRM3	cholinergic receptor muscarinic 3
ILMN_1425	0.197935	0.00634	-3.58312	-2.13267	-0.701804	FOXO4	forkhead box O4
ILMN_27641	0.198283	0.00636	3.58097	-2.13584	0.737263	TUBB8	tubulin beta 8 class VIII
ILMN_27305	0.198398	0.00638	3.57864	-2.13927	0.760277	DEF6	DEF6, guanine nucleotide exchange factor
ILMN_15602	0.198398	0.00638	-3.5786	-2.13933	-1.20855	CLCNKA	chloride voltage-gated channel Ka
ILMN_14551	0.199163	0.00641	-3.57508	-2.14452	-0.63586	SPANXN3	SPANX family member N3
ILMN_13652	0.200282	0.00646	3.57006	-2.15193	0.621464	UBQLN3	ubiquilin 3
ILMN_10935	0.200282	0.00647	-3.56913	-2.15329	-0.828036	MOAP1	modulator of apoptosis 1
ILMN_12816	0.200282	0.00648	3.56844	-2.15432	0.816763	RRP7A	ribosomal RNA processing 7 homolog A
ILMN_20440	0.201102	0.00651	3.56478	-2.15973	0.752484	ANGPTL4	angiopoietin like 4
ILMN_15308	0.201876	0.00655	3.56128	-2.1649	0.601265	TMEM200B	transmembrane protein 200B
ILMN_4310	0.20261	0.0066	-3.5567	-2.17166	-0.86915	COLEC12	collectin subfamily member 12
ILMN_25459	0.20261	0.00662	-3.55403	-2.1756	-0.603767	ESYT3	extended synaptotagmin 3
ILMN_10755	0.20261	0.00663	-3.55362	-2.17622	-1.41895	CKB	creatine kinase B
ILMN_24094	0.20261	0.00663	3.55338	-2.17657	0.899787	DAPP1	dual adaptor of phosphotyrosine and 3-phosphoinositides 1
ILMN_2956	0.20261	0.00663	-3.55334	-2.17663	-0.76584	ADH5	alcohol dehydrogenase 5 (class III), chi polypeptide
ILMN_28578	0.20261	0.00663	-3.55292	-2.17724	-0.614469
ILMN_1263	0.20261	0.00664	-3.55207	-2.17851	-0.863248	TMEM25	transmembrane protein 25
ILMN_8915	0.204007	0.00672	-3.5444	-2.18985	-0.689224
ILMN_17904	0.204007	0.00672	3.54437	-2.18989	0.796891	DNMT1	DNA (cytosine-5-)-methyltransferase 1
ILMN_19760	0.204007	0.00672	3.54421	-2.19013	1.38571	SOD2	superoxide dismutase 2, mitochondrial
ILMN_8973	0.204007	0.00673	-3.5437	-2.19088	-1.16007	SFTPD	surfactant protein D
ILMN_12933	0.204255	0.00675	3.54194	-2.19348	1.02198	F12	coagulation factor XII
ILMN_10472	0.204447	0.00677	3.53931	-2.19737	0.683091	E2F1	E2F transcription factor 1
ILMN_137100	0.204447	0.00678	-3.53857	-2.19846	-0.817468	GPX4	glutathione peroxidase 4
ILMN_24443	0.204447	0.00678	3.53844	-2.19866	0.810095	CAPN2	calpain 2
ILMN_8843	0.204603	0.00681	3.53605	-2.2022	0.711668	PIK3AP1	phosphoinositide-3-kinase adaptor protein 1
ILMN_2114	0.204603	0.00681	3.53603	-2.20223	1.53559	B3GALT5	beta-1,3-galactosyltransferase 5
ILMN_24327	0.205279	0.00685	-3.53217	-2.20795	-0.887604	CIRBP	cold inducible RNA binding protein
ILMN_12566	0.205279	0.00685	3.53197	-2.20824	0.856911	JAK2	Janus kinase 2
ILMN_21976	0.205414	0.00686	3.53059	-2.21029	0.652028	ACRC	acidic repeat containing
ILMN_6136	0.205575	0.00688	-3.52904	-2.21257	-0.761169	TCN2	transcobalamin 2
ILMN_29076	0.205575	0.00689	-3.52818	-2.21386	-0.658437	PTTG1IP	pituitary tumor-transforming 1 interacting protein
ILMN_21573	0.206339	0.00693	3.52481	-2.21885	0.579411	POLH	DNA polymerase eta
ILMN_20142	0.206937	0.00696	3.52197	-2.22306	1.15655	CEACAM1	carcinoembryonic antigen related cell adhesion molecule 1
ILMN_29518	0.20708	0.00697	-3.52057	-2.22512	-0.92157	EIF4EBP3	eukaryotic translation initiation factor 4E binding protein 3
ILMN_28101	0.208096	0.00702	-3.51637	-2.23135	-1.39712	PLD6	phospholipase D family member 6
ILMN_26297	0.208096	0.00702	-3.51549	-2.23265	-0.829959	ZDHHC2	zinc finger DHHC-type containing 2
ILMN_9525	0.208154	0.00704	3.51381	-2.23515	0.682354	NCOA7	nuclear receptor coactivator 7
ILMN_28456	0.208154	0.00705	3.51343	-2.2357	0.717155	DNAJC9	DnaJ heat shock protein family (Hsp40) member C9
ILMN_4244	0.208441	0.00707	-3.51151	-2.23856	-1.03869	SMYD2	SET and MYND domain containing 2
ILMN_2361	0.208441	0.00708	3.51006	-2.24071	0.643112	NUDT1	nudix hydrolase 1
ILMN_20208	0.208441	0.00709	3.5097	-2.24124	0.763584	TPX2	TPX2, microtubule nucleation factor
ILMN_24463	0.208441	0.0071	-3.5088	-2.24258	-0.788033	PTGIS	prostaglandin I2 (prostacyclin) synthase
ILMN_12138	0.208991	0.00713	-3.50615	-2.24651	-0.9927
ILMN_6032	0.210271	0.00718	3.50123	-2.2538	0.702093	PAICS	phosphoribosylaminoimidazole carboxylase; phosphoribosylaminoimidazolesuccinocarboxamide synthase
ILMN_25790	0.21061	0.0072	3.49926	-2.25674	0.895851	SLFN5	schlafen family member 5
ILMN_24457	0.211268	0.00723	-3.4963	-2.26113	-0.816212	DBN1	drebrin 1
ILMN_18332	0.211534	0.00725	-3.49455	-2.26372	-0.62479	PHF1	PHD finger protein 1
ILMN_20580	0.211545	0.00726	-3.49359	-2.26514	-1.22287	CDK18	cyclin dependent kinase 18
ILMN_2945	0.211555	0.00727	3.49264	-2.26656	0.853808	CKMT1B	creatine kinase, mitochondrial 1B
ILMN_27048	0.212309	0.00731	-3.48908	-2.27184	-0.571179	TGFB1I1	transforming growth factor beta 1 induced transcript 1
ILMN_10561	0.212309	0.00732	3.48849	-2.27273	0.978563	NACC2	NACC family member 2
ILMN_11014	0.212588	0.00734	-3.48671	-2.27537	-0.65465	ARRDC4	arrestin domain containing 4
ILMN_10450	0.212808	0.00736	3.48512	-2.27773	0.622327	MMS22L	MMS22 like, DNA repair protein
ILMN_1761	0.213775	0.0074	3.48126	-2.28348	1.00774	G6PD	glucose-6-phosphate dehydrogenase
ILMN_10890	0.214029	0.00742	3.47943	-2.28619	0.727434	PSME4	proteasome activator subunit 4
ILMN_2369	0.214029	0.00748	3.47478	-2.2931	0.593993	PLA2G4A	phospholipase A2 group IVA
ILMN_586	0.214029	0.00749	-3.47364	-2.2948	-1.60691	ITLN1	intelectin 1
ILMN_29210	0.214029	0.00749	3.47343	-2.2951	0.672318	GCKR	glucokinase (hexokinase 4) regulator
ILMN_8469	0.214029	0.00749	3.47343	-2.29511	1.02811	BAMBI	BMP and activin membrane bound inhibitor
ILMN_20793	0.214029	0.00751	3.47179	-2.29754	1.18099	CRELD2	cysteine rich with EGF like domains 2
ILMN_8884	0.214029	0.00754	-3.46944	-2.30104	-0.801145	ZNF610	zinc finger protein 610
ILMN_2559	0.214029	0.00755	-3.46874	-2.30209	-0.598499	ZNF711	zinc finger protein 711
ILMN_22077	0.214029	0.00755	-3.46816	-2.30294	-1.16435	CAMK2N1	calcium/calmodulin dependent protein kinase II inhibitor 1
ILMN_27027	0.214029	0.00755	-3.46807	-2.30308	-0.844698	PINK1	PTEN induced putative kinase 1
ILMN_10087	0.214029	0.00756	-3.46803	-2.30315	-0.631071	CYCS	cytochrome c, somatic
ILMN_28892	0.214029	0.00756	-3.4676	-2.30379	-0.585512	ATG5	autophagy related 5
ILMN_16673	0.214029	0.00757	3.4669	-2.30482	1.56582	LAG3	lymphocyte activating 3
ILMN_21147	0.214029	0.00757	-3.46686	-2.30488	-0.838815	LYRM5	LYR motif containing 5
ILMN_1988	0.214029	0.00758	-3.46551	-2.3069	-0.630991	CPQ	carboxypeptidase Q
ILMN_24602	0.214029	0.00759	-3.46519	-2.30737	-0.592179	ARPC4	actin related protein 2/3 complex subunit 4
ILMN_6154	0.214029	0.00759	-3.46515	-2.30744	-0.658216	GRK5	G protein-coupled receptor kinase 5
ILMN_3019	0.214047	0.0076	3.4642	-2.30884	0.672183	STRA13	stimulated by retinoic acid 13
ILMN_6609	0.214087	0.00761	-3.46319	-2.31035	-1.06122	FGF13	fibroblast growth factor 13
ILMN_11269	0.214615	0.00765	-3.46002	-2.31507	-0.804568	CCT6B	chaperonin containing TCP1 subunit 6B
ILMN_21376	0.214615	0.00767	-3.4582	-2.31777	-0.565651	KCNK16	potassium two pore domain channel subfamily K member 16
ILMN_13176	0.214615	0.00768	-3.45711	-2.3194	-0.735161	DDIT4	DNA damage inducible transcript 4
ILMN_28349	0.214615	0.00769	3.45688	-2.31974	0.876895	SLC37A1	solute carrier family 37 member 1
ILMN_17238	0.214615	0.00769	3.45664	-2.3201	0.670649	AMMECR1	Alport syndrome, mental retardation, midface hypoplasia and elliptocytosis chromosomal region gene 1
ILMN_17214	0.214615	0.00769	-3.45628	-2.32064	-1.33872	RGN	regucalcin
ILMN_3074	0.216039	0.00775	-3.4511	-2.32835	-0.700828	HNRNPU	heterogeneous nuclear ribonucleoprotein U
ILMN_7872	0.216198	0.00777	3.44974	-2.33037	0.54783	GPI	glucose-6-phosphate isomerase
ILMN_20328	0.216682	0.0078	3.44741	-2.33384	0.574893	NT5DC2	5'-nucleotidase domain containing 2
ILMN_22195	0.216984	0.00782	3.44563	-2.3365	0.931826	LST1	leukocyte specific transcript 1
ILMN_2275	0.217224	0.00784	-3.44404	-2.33887	-0.631978
ILMN_29496	0.217458	0.00786	3.44247	-2.34121	1.17554	SDF2L1	stromal cell derived factor 2 like 1
ILMN_22886	0.218258	0.0079	-3.43921	-2.34607	-0.849931	RNF130	ring finger protein 130
ILMN_2919	0.218475	0.00793	-3.43634	-2.35034	-1.01624	SYTL3	synaptotagmin like 3
ILMN_17695	0.218475	0.00794	3.43597	-2.3509	0.758916	CLCA4	chloride channel accessory 4
ILMN_13950	0.218475	0.00794	-3.43596	-2.35092	-0.710108	SYBU	syntabulin
ILMN_26359	0.218958	0.00797	3.43366	-2.35435	0.756765	PDSS1	prenyl (decaprenyl) diphosphate synthase, subunit 1
ILMN_11340	0.219064	0.00798	3.43248	-2.35611	0.773539	ELOVL6	ELOVL fatty acid elongase 6
ILMN_10029	0.219138	0.00799	3.43139	-2.35773	0.592646	NLRP7	NLR family pyrin domain containing 7
ILMN_14418	0.219181	0.00801	-3.42994	-2.3599	-0.665186	KLHL21	kelch like family member 21
ILMN_16096	0.219181	0.00804	3.42765	-2.36331	0.757255	LIM2	lens intrinsic membrane protein 2
ILMN_15720	0.219181	0.00805	3.42675	-2.36465	0.6223	MRPL14	mitochondrial ribosomal protein L14
ILMN_7911	0.219181	0.00805	-3.42658	-2.36491	-0.59796	CUL3	cullin 3
ILMN_4879	0.219181	0.00805	3.42658	-2.36491	1.13674	LYZ	lysozyme
ILMN_5194	0.219181	0.00806	3.42587	-2.36597	0.596502	IRF7	interferon regulatory factor 7
ILMN_3378	0.219181	0.00808	-3.42437	-2.3682	-0.892135	VSTM2A	V-set and transmembrane domain containing 2A
ILMN_11795	0.219181	0.00809	3.42364	-2.3693	1.05424	PSMB8	proteasome subunit beta 8
ILMN_2353	0.219181	0.00809	3.42346	-2.36957	1.83883	ATP2C2	ATPase secretory pathway Ca2+ transporting 2
ILMN_3781	0.219181	0.00811	3.42219	-2.37146	1.28327	IL32	interleukin 32
ILMN_22068	0.219181	0.00812	3.42125	-2.37286	0.644148	GPCPD1	glycerophosphocholine phosphodiesterase 1
ILMN_6336	0.219181	0.00812	3.42098	-2.37326	0.566489	ALKBH6	alkB homolog 6
ILMN_138103	0.219609	0.00816	3.41817	-2.37746	1.35618	CTLA4	cytotoxic T-lymphocyte associated protein 4
ILMN_30040	0.219609	0.00816	-3.41802	-2.37768	-0.830677	WDPCP	WD repeat containing planar cell polarity effector
ILMN_138070	0.21994	0.00819	3.41542	-2.38156	1.13568	C1QB	complement C1q B chain
ILMN_419	0.21994	0.00819	3.41535	-2.38167	0.61515	FEZ1	fasciculation and elongation protein zeta 1
ILMN_777	0.220583	0.00824	3.41147	-2.38748	0.710935	GPX2	glutathione peroxidase 2
ILMN_15304	0.220583	0.00825	-3.41118	-2.38791	-0.672392	ASMTL	acetylserotonin O-methyltransferase-like
ILMN_3614	0.220583	0.00825	-3.41093	-2.38827	-0.87092	C14orf37	chromosome 14 open reading frame 37
ILMN_20999	0.220922	0.00827	-3.4091	-2.39102	-0.856661	TSPAN12	tetraspanin 12
ILMN_11290	0.221171	0.0083	3.40681	-2.39444	0.910077	FCN1	ficolin 1
ILMN_19102	0.221171	0.0083	3.40669	-2.39461	0.756402	IFI27L2	interferon alpha inducible protein 27 like 2
ILMN_17441	0.221197	0.00832	-3.40578	-2.39598	-2.24381	GLDN	gliomedin
ILMN_19393	0.221486	0.00834	-3.40371	-2.39907	-0.701237	ACSM1	acyl-CoA synthetase medium-chain family member 1
ILMN_18431	0.221486	0.00835	3.40326	-2.39974	0.74045	POLE	DNA polymerase epsilon, catalytic subunit
ILMN_15465	0.222616	0.00843	-3.39689	-2.40927	-0.581934	C6orf226	chromosome 6 open reading frame 226
ILMN_17595	0.222616	0.00843	-3.39673	-2.4095	-0.724251	MMEL1	membrane metallo-endopeptidase-like 1
ILMN_7380	0.222616	0.00843	-3.39664	-2.40963	-0.954983	NIM1K	NIM1 serine/threonine protein kinase
ILMN_27936	0.222616	0.00843	-3.39664	-2.40964	-0.621552	CDK8	cyclin dependent kinase 8
ILMN_23242	0.22298	0.00846	3.39475	-2.41246	0.592583	GPR87	G protein-coupled receptor 87
ILMN_16798	0.223146	0.00849	-3.39269	-2.41554	-0.72528	CSNK2A2	casein kinase 2 alpha 2
ILMN_4998	0.223146	0.0085	-3.39123	-2.41772	-0.572232	FBXL3	F-box and leucine rich repeat protein 3
ILMN_10621	0.223146	0.00851	3.39111	-2.41791	0.914495	CASP1	caspase 1
ILMN_29995	0.223146	0.00851	-3.39065	-2.4186	-0.805189	HDAC7	histone deacetylase 7
ILMN_15658	0.223146	0.00852	-3.39014	-2.41936	-0.674652	BRE	brain and reproductive organ-expressed (TNFRSF1A modulator)
ILMN_4575	0.223939	0.00856	3.38703	-2.42402	0.921562	PDIA4	protein disulfide isomerase family A member 4
ILMN_15522	0.225159	0.00862	3.38269	-2.43051	0.719662	S100A11	S100 calcium binding protein A11
ILMN_12779	0.225634	0.00866	-3.37961	-2.43512	-0.731656	OR5D16	olfactory receptor family 5 subfamily D member 16
ILMN_139301	0.225634	0.00866	-3.37957	-2.43518	-1.16083	FAM134B	family with sequence similarity 134 member B
ILMN_567	0.225634	0.00867	3.37877	-2.43638	0.896906	ABCB6	ATP binding cassette subfamily B member 6 (Langereis blood group)
ILMN_22889	0.225634	0.00869	-3.37746	-2.43835	-0.763374	AJAP1	adherens junctions associated protein 1
ILMN_7276	0.225634	0.00869	-3.37724	-2.43867	-0.756684	DFNA5	DFNA5, deafness associated tumor suppressor
ILMN_17399	0.22655	0.00874	-3.37381	-2.4438	-0.605788	CACNG6	calcium voltage-gated channel auxiliary subunit gamma 6
ILMN_22150	0.226593	0.00877	3.37163	-2.44707	0.620204	HSPA4L	heat shock protein family A (Hsp70) member 4 like
ILMN_9048	0.226593	0.00878	-3.37081	-2.44829	-5.56439	DAZ3	deleted in azoospermia 3
ILMN_13053	0.226593	0.00879	-3.37017	-2.44925	-0.745941	MYOG	myogenin (myogenic factor 4)
ILMN_24671	0.226593	0.00879	-3.37001	-2.4495	-0.555059	CIPC	CLOCK interacting pacemaker
ILMN_1356	0.226593	0.00879	-3.36963	-2.45006	-0.919391	KLHL13	kelch like family member 13
ILMN_22757	0.226688	0.00881	3.36855	-2.45168	0.603203
ILMN_6659	0.228104	0.00888	3.36333	-2.45951	0.823925	NINJ2	ninjurin 2
ILMN_1627	0.228104	0.0089	-3.36219	-2.46122	-0.868548	CDC14B	cell division cycle 14B
ILMN_19670	0.228104	0.0089	-3.36212	-2.46133	-0.77738	LONRF2	LON peptidase N-terminal domain and ring finger 2
ILMN_9535	0.22865	0.00894	-3.3591	-2.46584	-1.14123	WASF3	WAS protein family member 3
ILMN_8053	0.22865	0.00894	-3.35897	-2.46604	-0.808026	TMEM18	transmembrane protein 18
ILMN_17020	0.22878	0.00896	3.3578	-2.4678	0.67409	SLC5A2	solute carrier family 5 member 2
ILMN_4820	0.22885	0.00898	-3.35608	-2.47038	-0.751755	UBE2W	ubiquitin conjugating enzyme E2 W (putative)
ILMN_6576	0.22885	0.00898	-3.35601	-2.47049	-0.698261	MAN2A2	mannosidase alpha class 2A member 2
ILMN_1799	0.229159	0.00905	-3.35095	-2.47807	-0.716449	GSAP	gamma-secretase activating protein
ILMN_1864	0.229159	0.0091	-3.34782	-2.48276	-0.52866	DHX40	DEAH-box helicase 40
ILMN_11817	0.229159	0.0091	-3.34778	-2.48283	-0.734319	ZNF570	zinc finger protein 570
ILMN_24871	0.229159	0.0091	3.34736	-2.48345	0.722688	POLD3	DNA polymerase delta 3, accessory subunit
ILMN_18070	0.229159	0.00911	3.34686	-2.48421	0.954229	CTRC	chymotrypsin C
ILMN_22413	0.229159	0.00911	-3.3465	-2.48475	-0.892305	CBX7	chromobox 7
ILMN_139409	0.229159	0.00912	-3.34606	-2.48541	-0.670995	DRD1	dopamine receptor D1
ILMN_12871	0.229159	0.00912	3.34595	-2.48557	0.575698	FANCD2	Fanconi anemia complementation group D2
ILMN_9681	0.229159	0.00914	-3.34488	-2.48718	-0.689922	BTG2	BTG anti-proliferation factor 2
ILMN_16420	0.229159	0.00915	-3.34427	-2.48809	-0.94555	CCNB1IP1	cyclin B1 interacting protein 1
ILMN_14819	0.229159	0.00915	3.34368	-2.48898	0.667141	MYDGF	myeloid derived growth factor
ILMN_16828	0.229159	0.00917	-3.34268	-2.49048	-0.623236	UBE2E3	ubiquitin conjugating enzyme E2 E3
ILMN_30022	0.229159	0.00917	3.34244	-2.49084	0.629936	GRIN3B	glutamate ionotropic receptor NMDA type subunit 3B
ILMN_3991	0.229159	0.00919	-3.34102	-2.49297	-0.538404
ILMN_22895	0.229159	0.00919	3.34096	-2.49306	0.915764	RNPEP	arginyl aminopeptidase
ILMN_23194	0.229159	0.0092	3.34072	-2.49342	0.654103	CSTF2	cleavage stimulation factor subunit 2
ILMN_24236	0.229159	0.0092	-3.34023	-2.49416	-0.589791	KCNMA1	potassium calcium-activated channel subfamily M alpha 1
ILMN_11676	0.229159	0.00921	-3.34009	-2.49437	-0.670321	PGAP1	post-GPI attachment to proteins 1
ILMN_24314	0.229159	0.00921	3.34005	-2.49443	0.572959
ILMN_13086	0.229159	0.00922	3.33937	-2.49545	0.705906	ARPP21	cAMP regulated phosphoprotein 21
ILMN_23308	0.229422	0.00924	-3.33785	-2.49773	-0.642761	RECK	reversion inducing cysteine rich protein with kazal motifs
ILMN_2732	0.229635	0.00926	-3.33648	-2.49979	-1.01975	IGFBP2	insulin like growth factor binding protein 2
ILMN_8890	0.229929	0.00928	3.33488	-2.50219	0.682063	SPRR4	small proline rich protein 4
ILMN_27809	0.230039	0.0093	-3.33343	-2.50437	-5.23928	DAZ4	deleted in azoospermia 4
ILMN_11739	0.230039	0.00931	3.33302	-2.50498	1.01326	IRF1	interferon regulatory factor 1
ILMN_5602	0.230157	0.00934	3.33106	-2.50792	0.645883	KRT23	keratin 23
ILMN_16127	0.230157	0.00935	3.32992	-2.50964	0.675827	CDC25C	cell division cycle 25C
ILMN_26247	0.230157	0.00936	-3.32968	-2.51	-0.745065	GLUL	glutamate-ammonia ligase
ILMN_26070	0.230157	0.00936	3.32961	-2.51011	0.739452	KCNK6	potassium two pore domain channel subfamily K member 6
ILMN_23221	0.23046	0.00939	-3.32723	-2.51367	-0.763652	PHLDB2	pleckstrin homology like domain family B member 2
ILMN_21593	0.23046	0.00939	3.32721	-2.51371	0.857243
ILMN_1619	0.23046	0.00941	-3.32609	-2.51539	-0.731841	PCBD2	pterin-4 alpha-carbinolamine dehydratase 2
ILMN_5227	0.23046	0.00942	-3.3251	-2.51688	-0.574736	FBXL5	F-box and leucine rich repeat protein 5
ILMN_27136	0.23046	0.00943	3.3247	-2.51749	0.638567	RNF145	ring finger protein 145
ILMN_19344	0.23046	0.00944	-3.32416	-2.51829	-0.704989	SPRY2	sprouty RTK signaling antagonist 2
ILMN_18627	0.230832	0.00946	3.32236	-2.52099	0.82105	TNFSF13B	tumor necrosis factor superfamily member 13b
ILMN_9945	0.231883	0.00952	3.31867	-2.52655	0.732931	ERI1	exoribonuclease 1
ILMN_9577	0.231883	0.00953	-3.31792	-2.52768	-0.926537
ILMN_14136	0.23214	0.00956	3.31573	-2.53096	0.628461	PNLDC1	PARN like, ribonuclease domain containing 1
ILMN_13793	0.23214	0.00956	3.31568	-2.53103	0.685	GYS2	glycogen synthase 2
ILMN_16766	0.233358	0.00963	-3.31086	-2.53828	-1.56215	ZNF385B	zinc finger protein 385B
ILMN_6529	0.233358	0.00964	3.31038	-2.539	0.628694	KRT19	keratin 19
ILMN_13404	0.233358	0.00965	3.30963	-2.54013	0.734894	TNFRSF9	TNF receptor superfamily member 9
ILMN_8687	0.233358	0.00966	-3.30929	-2.54064	-0.533859	OR6C68	olfactory receptor family 6 subfamily C member 68
ILMN_23737	0.233492	0.00971	3.30557	-2.54624	0.556054	SP1	Sp1 transcription factor
ILMN_26141	0.233492	0.00971	-3.30555	-2.54627	-0.609473	TDRD3	tudor domain containing 3
ILMN_6015	0.233492	0.00972	-3.30504	-2.54704	-1.32081	NWD1	NACHT and WD repeat domain containing 1
ILMN_18562	0.233492	0.00972	3.30479	-2.54741	0.909018	MYOF	myoferlin
ILMN_24878	0.233492	0.00972	3.30476	-2.54746	0.650789	CCT3	chaperonin containing TCP1 subunit 3
ILMN_26621	0.233492	0.00974	3.30383	-2.54887	1.05902	NCAPD2	non-SMC condensin I complex subunit D2
ILMN_10476	0.233492	0.00974	3.30366	-2.54912	1.0451
ILMN_6956	0.234024	0.00978	-3.30145	-2.55244	-1.19243	SLC4A2	solute carrier family 4 member 2
ILMN_20153	0.234511	0.00983	3.29798	-2.55767	0.894071	RNF186	ring finger protein 186
ILMN_7079	0.234511	0.00983	3.29761	-2.55823	0.737882	RIPK3	receptor interacting serine/threonine kinase 3
ILMN_5165	0.234511	0.00987	-3.29518	-2.56188	-0.597875	RAB3C	RAB3C, member RAS oncogene family
ILMN_17345	0.234511	0.00988	-3.2949	-2.5623	-0.610993	NDFIP1	Nedd4 family interacting protein 1
ILMN_1743	0.234511	0.00988	-3.2945	-2.5629	-0.696767	CA11	carbonic anhydrase 11
ILMN_7790	0.234511	0.00988	-3.29447	-2.56294	-0.535722	USF2	upstream transcription factor 2, c-fos interacting
ILMN_19232	0.234511	0.00989	3.29399	-2.56366	0.661798	APOL2	apolipoprotein L2
ILMN_19409	0.234511	0.00992	-3.29203	-2.56661	-0.532774	PRDX5	peroxiredoxin 5
ILMN_28967	0.234511	0.00993	3.29146	-2.56748	0.586097	HSPB1	heat shock protein family B (small) member 1
ILMN_15142	0.234511	0.00994	-3.29096	-2.56822	-0.768183	ESR1	estrogen receptor 1
ILMN_25840	0.234511	0.00994	3.29094	-2.56826	0.67028	HSPA4	heat shock protein family A (Hsp70) member 4
ILMN_21229	0.234511	0.00994	-3.29089	-2.56834	-0.612573	THAP3	THAP domain containing 3
ILMN_17213	0.234511	0.00994	3.29048	-2.56896	0.90326	RALGPS2	Ral GEF with PH domain and SH3 binding motif 2
ILMN_138664	0.234757	0.00997	3.28907	-2.57108	0.652899	HIF3A	hypoxia inducible factor 3 alpha subunit
ILMN_19880	0.234788	0.00998	3.28805	-2.57262	0.748558	SOD2	superoxide dismutase 2, mitochondrial
ILMN_25232	0.234788	0.00999	3.28735	-2.57367	0.976446	AUNIP	aurora kinase A and ninein interacting protein
ILMN_18559	0.234788	0.01	3.28679	-2.57452	0.6614	SLC33A1	solute carrier family 33 member 1
ILMN_11053	0.235011	0.01	-3.28545	-2.57654	-0.731194	RRM2B	ribonucleotide reductase regulatory TP53 inducible subunit M2B
ILMN_8061	0.235498	0.0101	3.28339	-2.57964	1.02523	ATP9B	ATPase phospholipid transporting 9B (putative)
ILMN_19800	0.23552	0.0101	-3.2826	-2.58083	-0.754166	SLC25A35	solute carrier family 25 member 35
ILMN_20483	0.235538	0.0101	3.28129	-2.58279	1.62909	GPNMB	glycoprotein nmb
ILMN_2176	0.235538	0.0101	-3.28074	-2.58362	-1.89825	FBXL13	F-box and leucine rich repeat protein 13
ILMN_11184	0.235538	0.0101	3.28036	-2.58419	0.754958	IDE	insulin degrading enzyme
ILMN_7357	0.235648	0.0101	3.27874	-2.58664	1.07211	MISP	mitotic spindle positioning
ILMN_24054	0.235648	0.0101	-3.27832	-2.58727	-0.690332	COBL	cordon-bleu WH2 repeat protein
ILMN_27731	0.235648	0.0102	3.2769	-2.58942	0.93108	PLIN1	perilipin 1
ILMN_138138	0.235648	0.0102	3.27657	-2.5899	0.751965	GSDMD	gasdermin D
ILMN_17143	0.235648	0.0102	3.27644	-2.5901	2.21331	XDH	xanthine dehydrogenase
ILMN_4787	0.236076	0.0102	3.2739	-2.59393	1.44592	PCDH20	protocadherin 20
ILMN_20003	0.236076	0.0102	3.27371	-2.59422	0.674465	RHBDL2	rhomboid like 2
ILMN_3550	0.236076	0.0102	-3.27311	-2.59512	-0.604094	ANOS1	anosmin 1
ILMN_3536	0.23612	0.0103	-3.27012	-2.59963	-0.934623
ILMN_15380	0.23612	0.0103	-3.26989	-2.59997	-0.545011	OGG1	8-oxoguanine DNA glycosylase
ILMN_3861	0.23612	0.0103	-3.26938	-2.60074	-0.516221	FGF12	fibroblast growth factor 12
ILMN_1825	0.23612	0.0103	3.26858	-2.60195	0.60827	TMEM53	transmembrane protein 53
ILMN_8354	0.23612	0.0103	3.26779	-2.60315	1.06931	CDC20	cell division cycle 20
ILMN_570	0.23612	0.0103	3.26778	-2.60315	0.693164	CEP152	centrosomal protein 152
ILMN_18109	0.23612	0.0103	-3.26765	-2.60335	-1.03135	RBPMS2	RNA binding protein with multiple splicing 2
ILMN_1606	0.23612	0.0103	3.26726	-2.60394	0.910177
ILMN_30017	0.237051	0.0104	3.26403	-2.60882	1.17602	HAVCR2	hepatitis A virus cellular receptor 2
ILMN_2103	0.237753	0.0104	3.26142	-2.61275	0.565215	RPS21	ribosomal protein S21
ILMN_28730	0.238066	0.0104	3.25986	-2.61509	0.741819	PRKDC	protein kinase, DNA-activated, catalytic polypeptide
ILMN_14701	0.240008	0.0105	3.25328	-2.62503	0.995164	EIF4G3	eukaryotic translation initiation factor 4 gamma 3
ILMN_19772	0.240008	0.0106	-3.25203	-2.62692	-0.535985	PDE5A	phosphodiesterase 5A
ILMN_27823	0.240008	0.0106	-3.25149	-2.62774	-0.938584
ILMN_9810	0.240008	0.0106	-3.25116	-2.62822	-0.809437	WDSUB1	WD repeat, sterile alpha motif and U-box domain containing 1
ILMN_137971	0.240008	0.0106	3.25097	-2.62851	0.843004	NECTIN1	nectin cell adhesion molecule 1
ILMN_5744	0.240008	0.0106	3.2489	-2.63164	0.695577
ILMN_16018	0.240008	0.0106	3.24858	-2.63213	0.691506	FAM81A	family with sequence similarity 81 member A
ILMN_11091	0.240008	0.0106	-3.24839	-2.6324	-0.606084	NDUFA4L2	NDUFA4, mitochondrial complex associated like 2
ILMN_22820	0.240008	0.0106	3.2483	-2.63254	0.668689	CD40	CD40 molecule
ILMN_13194	0.240142	0.0106	-3.24724	-2.63414	-0.583412	RNF215	ring finger protein 215
ILMN_3972	0.240322	0.0107	3.24564	-2.63655	0.934165	AIM1	absent in melanoma 1
ILMN_14773	0.240322	0.0107	3.24536	-2.63698	0.757391	PGM3	phosphoglucomutase 3
ILMN_28841	0.240664	0.0107	-3.24315	-2.64032	-0.605985	BRWD1	bromodomain and WD repeat domain containing 1
ILMN_27537	0.240664	0.0107	3.24305	-2.64047	0.730553	HSP90AA1	heat shock protein 90 alpha family class A member 1
ILMN_138392	0.241193	0.0108	-3.24002	-2.64505	-0.763075	RPL37	ribosomal protein L37
ILMN_2339	0.241193	0.0108	-3.23861	-2.64717	-0.522542	ZNF16	zinc finger protein 16
ILMN_138217	0.241193	0.0108	3.23845	-2.64742	0.54285	UBR4	ubiquitin protein ligase E3 component n-recognin 4
ILMN_11065	0.241193	0.0108	-3.23808	-2.64798	-1.49504	ODAM	odontogenic, ameloblast asssociated
ILMN_27787	0.241193	0.0108	3.23795	-2.64817	0.840433	SORD	sorbitol dehydrogenase
ILMN_18430	0.241193	0.0108	3.23684	-2.64985	0.699074	DCLK1	doublecortin like kinase 1
ILMN_7293	0.241193	0.0108	3.23605	-2.65104	0.847137	ACKR4	atypical chemokine receptor 4
ILMN_7346	0.241193	0.0108	3.23508	-2.65251	0.620411
ILMN_17456	0.241193	0.0109	-3.23431	-2.65367	-0.69793	SOX4	SRY-box 4
ILMN_13854	0.241193	0.0109	-3.23353	-2.65484	-0.81769	MACROD1	MACRO domain containing 1
ILMN_17027	0.241193	0.0109	3.23199	-2.65717	0.769651	CCNE2	cyclin E2
ILMN_1089	0.241193	0.0109	3.23196	-2.65721	0.743679	TUBA1A	tubulin alpha 1a
ILMN_137280	0.241193	0.0109	-3.22949	-2.66095	-1.29742	HACD1	3-hydroxyacyl-CoA dehydratase 1
ILMN_12902	0.241193	0.0109	3.22944	-2.66103	0.895743	MFSD2A	major facilitator superfamily domain containing 2A
ILMN_16478	0.241193	0.011	3.22858	-2.66233	0.880831
ILMN_3255	0.241193	0.011	-3.2282	-2.6629	-0.938457	SCAMP5	secretory carrier membrane protein 5
ILMN_28148	0.241193	0.011	3.22803	-2.66315	1.03219	SLC6A12	solute carrier family 6 member 12
ILMN_2622	0.241193	0.011	-3.22795	-2.66328	-0.525781	ANKRD28	ankyrin repeat domain 28
ILMN_4100	0.241193	0.011	3.22792	-2.66332	0.65065	LMNB1	lamin B1
ILMN_10101	0.241193	0.011	3.22647	-2.66552	0.637283	SSTR5	somatostatin receptor 5
ILMN_15689	0.241193	0.011	3.22619	-2.66593	1.1384	OAS3	2'-5'-oligoadenylate synthetase 3
ILMN_137163	0.241193	0.011	3.22557	-2.66688	1.09568	CD163L1	CD163 molecule like 1
ILMN_8678	0.241193	0.011	-3.22494	-2.66783	-0.604133	TTLL7	tubulin tyrosine ligase like 7
ILMN_659	0.241193	0.011	3.22422	-2.66892	0.995809	HYOU1	hypoxia up-regulated 1
ILMN_12742	0.241193	0.011	-3.22414	-2.66904	-0.535953	ZNF177	zinc finger protein 177
ILMN_139157	0.241193	0.011	3.22374	-2.66964	0.723635	DOCK5	dedicator of cytokinesis 5
ILMN_10348	0.241712	0.0111	-3.22169	-2.67274	-0.560225	KIRREL2	kin of IRRE like 2 (Drosophila)
ILMN_25328	0.24185	0.0111	3.22029	-2.67486	1.0153	AVPR1A	arginine vasopressin receptor 1A
ILMN_10570	0.24185	0.0111	-3.21936	-2.67627	-0.684539	CASP14	caspase 14
ILMN_2842	0.24185	0.0111	-3.2193	-2.67635	-1.1847	CTIF	cap binding complex dependent translation initiation factor
ILMN_10473	0.241943	0.0111	-3.21801	-2.6783	-0.609094	FGF23	fibroblast growth factor 23
ILMN_8274	0.241943	0.0111	3.2177	-2.67877	0.775316	FNDC4	fibronectin type III domain containing 4
ILMN_6643	0.242973	0.0112	-3.21432	-2.68389	-0.57858	LAMB4	laminin subunit beta 4
ILMN_4098	0.242992	0.0112	3.21252	-2.6866	0.695153	CDKN3	cyclin dependent kinase inhibitor 3
ILMN_19975	0.242992	0.0112	3.21157	-2.68803	1.76231	MIA	melanoma inhibitory activity
ILMN_22940	0.242992	0.0113	-3.21092	-2.68903	-0.873653	TRAM1L1	translocation associated membrane protein 1-like 1
ILMN_7934	0.242992	0.0113	-3.2108	-2.68921	-0.553159	C7orf31	chromosome 7 open reading frame 31
ILMN_17137	0.242992	0.0113	-3.20969	-2.69088	-0.636361	TRIM6-TRIM34	TRIM6-TRIM34 readthrough
ILMN_18854	0.242992	0.0113	-3.20963	-2.69098	-0.790321	FAM19A1	family with sequence similarity 19 member A1, C-C motif chemokine like
ILMN_14675	0.242992	0.0113	-3.20957	-2.69107	-0.623748	PLOD2	procollagen-lysine,2-oxoglutarate 5-dioxygenase 2
ILMN_28827	0.243448	0.0113	-3.20771	-2.69388	-0.796143	TMEM161B	transmembrane protein 161B
ILMN_10095	0.243873	0.0113	3.20591	-2.69661	1.02898	LYN	LYN proto-oncogene, Src family tyrosine kinase
ILMN_5256	0.243873	0.0114	3.20526	-2.69759	0.745572	HNRNPA3	heterogeneous nuclear ribonucleoprotein A3
ILMN_26815	0.24398	0.0114	-3.20431	-2.69902	-0.816793	PODXL2	podocalyxin like 2
ILMN_23183	0.244816	0.0115	-3.19685	-2.71031	-0.643582	NPHP1	nephrocystin 1
ILMN_15077	0.244816	0.0115	3.19656	-2.71075	0.670097	LINC00905	long intergenic non-protein coding RNA 905
ILMN_19696	0.244816	0.0115	3.19607	-2.71149	0.560154	DYNAP	dynactin associated protein
ILMN_20448	0.244816	0.0115	-3.19602	-2.71157	-1.3577	CPA2	carboxypeptidase A2
ILMN_25881	0.244816	0.0115	-3.19563	-2.71216	-0.942917	GLUL	glutamate-ammonia ligase
ILMN_20363	0.244816	0.0115	3.19474	-2.7135	0.75127	TUBA4A	tubulin alpha 4a
ILMN_17585	0.244816	0.0115	3.19473	-2.71352	0.623497	STT3A	STT3A, catalytic subunit of the oligosaccharyltransferase complex
ILMN_23450	0.244816	0.0116	3.19392	-2.71474	0.852917	ALDH16A1	aldehyde dehydrogenase 16 family member A1
ILMN_2558	0.244816	0.0116	3.19372	-2.71506	0.636226
ILMN_29704	0.244816	0.0116	-3.19308	-2.71602	-0.558382	PLEKHB2	pleckstrin homology domain containing B2
ILMN_5460	0.244816	0.0116	-3.19277	-2.71649	-0.58005	FAM20C	family with sequence similarity 20 member C
ILMN_17479	0.244816	0.0116	3.19247	-2.71695	1.04598	TAP1	transporter 1, ATP binding cassette subfamily B member
ILMN_22082	0.244816	0.0116	3.19242	-2.71702	1.02169	FBN2	fibrillin 2
ILMN_13268	0.244816	0.0116	-3.19229	-2.71722	-0.830383	SLC27A1	solute carrier family 27 member 1
ILMN_4061	0.244816	0.0116	3.19224	-2.7173	0.616415	YIPF7	Yip1 domain family member 7
ILMN_26913	0.245004	0.0116	-3.19109	-2.71903	-0.736753	SSBP3	single stranded DNA binding protein 3
ILMN_10859	0.24549	0.0117	-3.18825	-2.72333	-0.900537	TBC1D4	TBC1 domain family member 4
ILMN_7536	0.24549	0.0117	3.18672	-2.72565	0.500826	PPID	peptidylprolyl isomerase D
ILMN_2127	0.24549	0.0117	3.18662	-2.72581	0.869879	FOSL1	FOS like 1, AP-1 transcription factor subunit
ILMN_15769	0.24549	0.0117	-3.18643	-2.72609	-1.55553	USP9Y	ubiquitin specific peptidase 9, Y-linked
ILMN_6255	0.24549	0.0117	3.18595	-2.72682	0.708876	SVIL	supervillin
ILMN_19849	0.24549	0.0117	3.18579	-2.72707	0.633877	TOP2A	topoisomerase (DNA) II alpha
ILMN_27520	0.24549	0.0117	3.18434	-2.72926	0.607004	OR4D9	olfactory receptor family 4 subfamily D member 9
ILMN_6429	0.24549	0.0117	3.18416	-2.72953	0.86103	EML5	echinoderm microtubule associated protein like 5
ILMN_4757	0.24549	0.0117	-3.18398	-2.7298	-0.7667	BCKDHB	branched chain keto acid dehydrogenase E1 subunit beta
ILMN_11046	0.24601	0.0118	3.18101	-2.7343	1.05362	CALML4	calmodulin like 4
ILMN_22189	0.24601	0.0118	-3.18032	-2.73535	-0.533436	TGFBR2	transforming growth factor beta receptor 2
ILMN_28596	0.24601	0.0118	-3.18005	-2.73575	-1.32731	TM7SF2	transmembrane 7 superfamily member 2
ILMN_23556	0.24601	0.0118	-3.18004	-2.73576	-1.4101	SPINK7	serine peptidase inhibitor, Kazal type 7 (putative)
ILMN_27007	0.24642	0.0118	-3.17834	-2.73834	-0.612868	LZTFL1	leucine zipper transcription factor like 1
ILMN_13594	0.246423	0.0119	-3.17769	-2.73933	-0.720645	NME5	NME/NM23 family member 5
ILMN_2061	0.246792	0.0119	-3.17483	-2.74366	-0.918886	ADPRHL1	ADP-ribosylhydrolase like 1
ILMN_22266	0.246792	0.0119	-3.17407	-2.74482	-0.680744	SLC39A11	solute carrier family 39 member 11
ILMN_5682	0.246792	0.012	3.17187	-2.74815	1.63975	C3	complement component 3
ILMN_15225	0.246792	0.012	3.17178	-2.74828	0.643053	FIGNL1	fidgetin like 1
ILMN_13048	0.246792	0.012	3.17165	-2.74848	0.8726	STAB1	stabilin 1
ILMN_22272	0.246792	0.012	-3.16989	-2.75115	-0.872249	PRSS23	protease, serine 23
ILMN_1284	0.246792	0.012	3.16961	-2.75157	0.666196	RGS3	regulator of G-protein signaling 3
ILMN_21136	0.246792	0.012	3.16945	-2.75182	0.682574
ILMN_25694	0.246792	0.012	-3.16776	-2.75437	-1.18252	TMPRSS11E	transmembrane protease, serine 11E
ILMN_2161	0.246792	0.0121	3.16736	-2.75498	0.975688	TCIRG1	T-cell immune regulator 1, ATPase H+ transporting V0 subunit a3
ILMN_14704	0.246792	0.0121	-3.16572	-2.75747	-4.48717	EIF1AY	eukaryotic translation initiation factor 1A, Y-linked
ILMN_137859	0.246792	0.0121	3.16559	-2.75767	0.561277	PLPPR5	phospholipid phosphatase related 5
ILMN_5324	0.246792	0.0121	-3.1654	-2.75795	-0.582409
ILMN_22267	0.246792	0.0121	-3.16465	-2.75909	-0.74387	EID1	EP300 interacting inhibitor of differentiation 1
ILMN_27212	0.246792	0.0121	-3.1642	-2.75977	-0.772402	ACOT13	acyl-CoA thioesterase 13
ILMN_1889	0.246792	0.0121	3.16395	-2.76015	0.951605	MS4A6A	membrane spanning 4-domains A6A
ILMN_21263	0.246792	0.0121	-3.1637	-2.76052	-0.558769	APOLD1	apolipoprotein L domain containing 1
ILMN_9972	0.246792	0.0121	-3.1634	-2.76098	-0.520765	SNX21	sorting nexin family member 21
ILMN_28552	0.246792	0.0121	3.16264	-2.76213	1.08775	MND1	meiotic nuclear divisions 1
ILMN_1905	0.246792	0.0122	-3.16184	-2.76334	-0.775864	CD59	CD59 molecule
ILMN_28480	0.246792	0.0122	3.16167	-2.76361	0.492574	TCAF2	TRPM8 channel associated factor 2
ILMN_2485	0.246792	0.0122	-3.16104	-2.76457	-0.943019	SLC25A4	solute carrier family 25 member 4
ILMN_18270	0.246792	0.0122	3.15971	-2.76657	0.847488	OPCML	opioid binding protein/cell adhesion molecule like
ILMN_23137	0.246792	0.0122	3.15928	-2.76723	0.568407	AARS2	alanyl-tRNA synthetase 2, mitochondrial
ILMN_22311	0.246792	0.0122	-3.15922	-2.76733	-0.778091	CTNNBIP1	catenin beta interacting protein 1
ILMN_9092	0.246792	0.0122	-3.15907	-2.76755	-0.519494	CNBP	CCHC-type zinc finger nucleic acid binding protein
ILMN_29378	0.246792	0.0122	-3.15863	-2.76822	-0.674083	DCAF8L1	DDB1 and CUL4 associated factor 8 like 1
ILMN_18621	0.246792	0.0123	3.15493	-2.77383	0.55727	CER1	cerberus 1, DAN family BMP antagonist
ILMN_29826	0.246792	0.0123	3.15489	-2.77389	0.932294	TFAP2E	transcription factor AP-2 epsilon
ILMN_8434	0.246792	0.0123	3.15468	-2.77421	0.526931	SEC23B	Sec23 homolog B, coat complex II component
ILMN_15399	0.246792	0.0123	3.15375	-2.77561	0.557542	COPG1	coatomer protein complex subunit gamma 1
ILMN_4819	0.246792	0.0123	3.15369	-2.77572	0.994335
ILMN_10643	0.246792	0.0123	-3.15367	-2.77575	-0.535089	NLRP11	NLR family pyrin domain containing 11
ILMN_16535	0.246792	0.0123	3.15341	-2.77613	0.511023	GMDS	GDP-mannose 4,6-dehydratase
ILMN_11056	0.246792	0.0123	3.15324	-2.77639	0.602507	MPZL1	myelin protein zero like 1
ILMN_25672	0.246792	0.0123	-3.15295	-2.77684	-0.804547	KLK11	kallikrein related peptidase 11
ILMN_25511	0.246792	0.0123	3.15278	-2.7771	0.656107	TPTE2	transmembrane phosphoinositide 3-phosphatase and tensin homolog 2
ILMN_22586	0.246792	0.0123	-3.15277	-2.7771	-0.802927
ILMN_22371	0.246897	0.0124	3.15142	-2.77915	0.580792	HIC2	hypermethylated in cancer 2
ILMN_15186	0.246897	0.0124	-3.15127	-2.77938	-0.506564	ADAMTS8	ADAM metallopeptidase with thrombospondin type 1 motif 8
ILMN_138972	0.247465	0.0124	-3.14784	-2.78458	-0.762135	B3GALNT1	beta-1,3-N-acetylgalactosaminyltransferase 1 (globoside blood group)
ILMN_30173	0.247465	0.0125	3.14653	-2.78658	0.696533
ILMN_15576	0.247465	0.0125	3.14581	-2.78766	0.583723	ARHGAP11A	Rho GTPase activating protein 11A
ILMN_28992	0.247465	0.0125	3.14579	-2.78769	0.666662	FEZ1	fasciculation and elongation protein zeta 1
ILMN_11802	0.247465	0.0125	3.14555	-2.78805	0.620484	KIF23	kinesin family member 23
ILMN_2009	0.247465	0.0125	3.14483	-2.78916	1.0224	MS4A6A	membrane spanning 4-domains A6A
ILMN_17168	0.247465	0.0125	-3.14463	-2.78945	-0.78054	GGA2	golgi associated, gamma adaptin ear containing, ARF binding protein 2
ILMN_590	0.247465	0.0125	-3.14452	-2.78962	-0.500522	SNX14	sorting nexin 14
ILMN_137796	0.247465	0.0125	-3.14369	-2.79089	-0.628685	ZNF626	zinc finger protein 626
ILMN_15148	0.247465	0.0125	3.14349	-2.79119	0.736006	MS4A7	membrane spanning 4-domains A7
ILMN_139034	0.247465	0.0125	-3.14302	-2.79189	-0.514312	KCNJ10	potassium voltage-gated channel subfamily J member 10
ILMN_24468	0.247465	0.0125	-3.14244	-2.79277	-0.657917	FKBP8	FK506 binding protein 8
ILMN_20300	0.247518	0.0126	-3.14122	-2.79464	-0.653666	LOC401052	uncharacterized LOC401052
ILMN_9778	0.247518	0.0126	-3.14109	-2.79483	-0.59149	PKHD1	polycystic kidney and hepatic disease 1 (autosomal recessive)
ILMN_27602	0.247802	0.0126	-3.13924	-2.79763	-0.787856	MAMDC2	MAM domain containing 2
ILMN_26535	0.247802	0.0126	3.13911	-2.79783	0.551743	CYB561D2	cytochrome b561 family member D2
ILMN_13465	0.247802	0.0126	-3.13807	-2.79941	-0.605719	ORAI3	ORAI calcium release-activated calcium modulator 3
ILMN_4115	0.247802	0.0126	3.13742	-2.8004	0.845069
ILMN_15343	0.247802	0.0126	3.13733	-2.80054	0.843415	ZNF488	zinc finger protein 488
ILMN_26612	0.248481	0.0127	-3.13498	-2.8041	-0.778943	CA9	carbonic anhydrase 9
ILMN_26768	0.248532	0.0127	-3.13423	-2.80524	-0.584642	PLEKHF2	pleckstrin homology and FYVE domain containing 2
ILMN_5639	0.248532	0.0127	-3.13363	-2.80616	-1.24375	MTURN	maturin, neural progenitor differentiation regulator homolog (Xenopus)
ILMN_15017	0.248532	0.0127	3.13304	-2.80705	0.826054
ILMN_4942	0.248863	0.0128	-3.13107	-2.81004	-0.662297	CCDC121	coiled-coil domain containing 121
ILMN_25468	0.248863	0.0128	3.13099	-2.81016	0.62476	FAM47B	family with sequence similarity 47 member B
ILMN_18408	0.248906	0.0128	3.13028	-2.81124	0.879236	LGALS4	galectin 4
ILMN_1400	0.249104	0.0128	-3.12917	-2.81292	-0.754975	FAH	fumarylacetoacetate hydrolase
ILMN_15632	0.249207	0.0128	-3.12831	-2.81423	-0.628761	FOXD4L4	forkhead box D4-like 4
ILMN_2158	0.249468	0.0128	-3.12704	-2.81615	-0.583406	ULK1	unc-51 like autophagy activating kinase 1
ILMN_7398	0.249498	0.0129	-3.12637	-2.81718	-1.04009	FAM150B	family with sequence similarity 150 member B
ILMN_2904	0.249559	0.0129	-3.12561	-2.81832	-0.705007	CNTN3	contactin 3
ILMN_21854	0.24974	0.0129	3.12456	-2.81993	0.905786	CDC6	cell division cycle 6
ILMN_12596	0.250019	0.0129	3.12323	-2.82195	0.632752	GPR151	G protein-coupled receptor 151
ILMN_29490	0.250019	0.013	3.1216	-2.82443	0.647861	WDR90	WD repeat domain 90
ILMN_1406	0.250019	0.013	-3.12153	-2.82452	-0.484971	PPP3CC	protein phosphatase 3 catalytic subunit gamma
ILMN_22738	0.250019	0.013	3.12142	-2.8247	0.864647	CIITA	class II major histocompatibility complex transactivator
ILMN_2442	0.250019	0.013	-3.12087	-2.82553	-1.04944	NREP	neuronal regeneration related protein
ILMN_21302	0.250364	0.013	3.11881	-2.82865	1.07177	BST2	bone marrow stromal cell antigen 2
ILMN_27992	0.250364	0.013	-3.1188	-2.82867	-0.530403
ILMN_6507	0.25051	0.013	3.11784	-2.83013	0.786725	ATP2A3	ATPase sarcoplasmic/endoplasmic reticulum Ca2+ transporting 3
ILMN_17361	0.250742	0.0131	-3.11666	-2.83193	-0.676654	CGB5	chorionic gonadotropin beta subunit 5
ILMN_9895	0.250933	0.0131	-3.11512	-2.83427	-0.618426	DYNLRB2	dynein light chain roadblock-type 2
ILMN_7209	0.250933	0.0131	-3.11499	-2.83446	-0.527386	SNTG1	syntrophin gamma 1
ILMN_20556	0.251658	0.0131	3.11257	-2.83814	0.58718	HM13	histocompatibility minor 13
ILMN_4321	0.252142	0.0132	3.11076	-2.84089	0.554935	CFLAR	CASP8 and FADD like apoptosis regulator
ILMN_25058	0.252568	0.0132	-3.1091	-2.84341	-0.705682	NUMA1	nuclear mitotic apparatus protein 1
ILMN_10020	0.252609	0.0132	-3.10783	-2.84535	-0.550341	TRPC1	transient receptor potential cation channel subfamily C member 1
ILMN_18236	0.252609	0.0132	3.1077	-2.84554	0.528509	GPKOW	G-patch domain and KOW motifs
ILMN_20762	0.252609	0.0133	-3.10723	-2.84625	-0.574411	POLR2M	RNA polymerase II subunit M
ILMN_17288	0.252754	0.0133	-3.10628	-2.8477	-0.749328	MAMLD1	mastermind like domain containing 1
ILMN_7513	0.252764	0.0133	-3.10567	-2.84863	-0.579319	PROKR2	prokineticin receptor 2
ILMN_22435	0.252853	0.0133	-3.10401	-2.85115	-0.602154	METTL18	methyltransferase like 18
ILMN_8002	0.252853	0.0133	3.10388	-2.85135	0.692537	GAGE8	G antigen 8
ILMN_18776	0.252853	0.0133	-3.10325	-2.85231	-0.672719	STX12	syntaxin 12
ILMN_26238	0.252853	0.0133	3.10311	-2.85253	0.977858	DIP2A	disco interacting protein 2 homolog A
ILMN_12046	0.253007	0.0134	3.1014	-2.85512	0.774609	WNT10A	Wnt family member 10A
ILMN_22156	0.253007	0.0134	-3.10125	-2.85534	-0.879762	B4GALT6	beta-1,4-galactosyltransferase 6
ILMN_3694	0.253007	0.0134	3.10022	-2.85691	0.670401	PIEZO1	piezo type mechanosensitive ion channel component 1
ILMN_8178	0.253007	0.0134	3.10001	-2.85723	0.508583	ALDH1B1	aldehyde dehydrogenase 1 family member B1
ILMN_29001	0.253007	0.0134	-3.0998	-2.85754	-1.46068	PLA2G1B	phospholipase A2 group IB
ILMN_4109	0.253186	0.0134	-3.09878	-2.85911	-0.541977	CRAT	carnitine O-acetyltransferase
ILMN_30004	0.253836	0.0135	-3.09657	-2.86246	-0.724601	ADARB1	adenosine deaminase, RNA specific B1
ILMN_4227	0.254399	0.0135	-3.09458	-2.86548	-0.570779	PDE5A	phosphodiesterase 5A
ILMN_18461	0.254813	0.0136	-3.09297	-2.86793	-0.642116	NFRKB	nuclear factor related to kappaB binding protein
ILMN_4776	0.255041	0.0136	-3.09129	-2.87049	-0.563001	THRA	thyroid hormone receptor, alpha
ILMN_1032	0.255041	0.0136	3.09125	-2.87055	1.17194	COL6A3	collagen type VI alpha 3 chain
ILMN_3945	0.255345	0.0136	-3.08992	-2.87258	-0.672128	PLCB1	phospholipase C beta 1
ILMN_139228	0.255731	0.0137	3.08838	-2.87491	0.534071	NUP85	nucleoporin 85
ILMN_10778	0.255734	0.0137	3.0878	-2.8758	0.89352	HELZ2	helicase with zinc finger 2
ILMN_2475	0.256016	0.0137	-3.08597	-2.87858	-0.612736	PAM	peptidylglycine alpha-amidating monooxygenase
ILMN_22486	0.256016	0.0137	3.08595	-2.87862	0.606263	DCTPP1	dCTP pyrophosphatase 1
ILMN_29653	0.256385	0.0137	3.08435	-2.88105	0.816931	PSMB10	proteasome subunit beta 10
ILMN_5271	0.256385	0.0137	3.08389	-2.88175	0.548489	FASTKD1	FAST kinase domains 1
ILMN_24538	0.256458	0.0138	3.08313	-2.8829	1.44921	PLAUR	plasminogen activator, urokinase receptor
ILMN_23594	0.25652	0.0138	-3.08144	-2.88548	-0.566415	TULP4	tubby like protein 4
ILMN_22520	0.25652	0.0138	-3.08133	-2.88565	-0.759962	IGF2BP2	insulin like growth factor 2 mRNA binding protein 2
ILMN_533	0.25652	0.0138	-3.08083	-2.88641	-0.713063	TMIE	transmembrane inner ear
ILMN_15679	0.25652	0.0138	-3.0804	-2.88706	-0.533001	WDR48	WD repeat domain 48
ILMN_7660	0.25652	0.0138	3.07955	-2.88835	0.755389	CREB3L3	cAMP responsive element binding protein 3 like 3
ILMN_19167	0.25652	0.0138	-3.07955	-2.88835	-0.500321	SMARCD3	SWI/SNF related, matrix associated, actin dependent regulator of chromatin, subfamily d, member 3
ILMN_4697	0.257071	0.0139	3.07761	-2.89131	0.855268	GPRIN2	G protein regulated inducer of neurite outgrowth 2
ILMN_19379	0.257071	0.0139	3.07687	-2.89243	0.555125	ATOH1	atonal bHLH transcription factor 1
ILMN_13285	0.257071	0.0139	3.07648	-2.89302	0.612699	FANCA	Fanconi anemia complementation group A
ILMN_4750	0.257495	0.014	3.07418	-2.89652	0.620858	BCL2L12	BCL2 like 12
ILMN_12621	0.257495	0.014	-3.0738	-2.8971	-0.524475	PTPN20	protein tyrosine phosphatase, non-receptor type 20
ILMN_11682	0.257495	0.014	-3.07374	-2.8972	-0.769674	TSC22D1	TSC22 domain family member 1
ILMN_26127	0.258486	0.0141	-3.06989	-2.90305	-0.501234	HDAC11	histone deacetylase 11
ILMN_22942	0.258486	0.0141	-3.06906	-2.90431	-0.76999	NEBL	nebulette
ILMN_7033	0.258486	0.0141	3.06901	-2.9044	0.748729	GINS3	GINS complex subunit 3
ILMN_4740	0.258486	0.0141	-3.06869	-2.90488	-0.517755	ATAD1	ATPase family, AAA domain containing 1
ILMN_21654	0.258486	0.0141	3.06818	-2.90566	0.65503	NASP	nuclear autoantigenic sperm protein
ILMN_10410	0.258486	0.0141	-3.06787	-2.90613	-0.669879	ZNF579	zinc finger protein 579
ILMN_9210	0.258486	0.0141	3.06693	-2.90756	0.577697	RAD9A	RAD9 checkpoint clamp component A
ILMN_25834	0.258486	0.0141	-3.06678	-2.90779	-0.475012	PARP16	poly(ADP-ribose) polymerase family member 16
ILMN_16314	0.258593	0.0141	-3.06596	-2.90904	-0.698131	SPDYE3	speedy/RINGO cell cycle regulator family member E3
ILMN_1426	0.259044	0.0142	-3.06401	-2.912	-0.656045	PSG2	pregnancy specific beta-1-glycoprotein 2
ILMN_13490	0.259044	0.0142	-3.06359	-2.91265	-0.926424	KLHDC9	kelch domain containing 9
ILMN_14735	0.259044	0.0142	-3.06291	-2.91369	-0.56956	CAMSAP2	calmodulin regulated spectrin associated protein family member 2
ILMN_28710	0.259044	0.0142	3.06261	-2.91414	0.611447
ILMN_6505	0.259106	0.0142	-3.0619	-2.91522	-0.568092	TNNI2	troponin I2, fast skeletal type
ILMN_12849	0.259889	0.0143	-3.05892	-2.91975	-0.634548	TMEM105	transmembrane protein 105
ILMN_21485	0.259889	0.0143	3.05887	-2.91983	0.538031	DAZ2	deleted in azoospermia 2
ILMN_5579	0.26029	0.0143	3.05723	-2.92233	1.0779	MACC1	metastasis associated in colon cancer 1
ILMN_12640	0.26029	0.0144	3.05628	-2.92379	0.7959	BOP1	block of proliferation 1
ILMN_14809	0.26029	0.0144	-3.05622	-2.92386	-0.650867	BCL2L11	BCL2 like 11
ILMN_22959	0.26112	0.0144	3.05365	-2.92778	0.504012	CCT7	chaperonin containing TCP1 subunit 7
ILMN_2100	0.261482	0.0145	-3.05181	-2.93059	-0.696178	SLC7A13	solute carrier family 7 member 13
ILMN_21501	0.261482	0.0145	3.05161	-2.93089	0.53045	SLC39A7	solute carrier family 39 member 7
ILMN_628	0.261482	0.0145	-3.05081	-2.93211	-0.612503	MXRA7	matrix remodeling associated 7
ILMN_3144	0.261482	0.0145	-3.05012	-2.93316	-0.585844	CALHM1	calcium homeostasis modulator 1
ILMN_28278	0.261482	0.0145	3.04976	-2.93372	0.856714	LPAR1	lysophosphatidic acid receptor 1
ILMN_7707	0.261482	0.0145	-3.0494	-2.93425	-0.659666	PCMTD1	protein-L-isoaspartate (D-aspartate) O-methyltransferase domain containing 1
ILMN_7201	0.261482	0.0145	-3.04861	-2.93547	-0.641354	BTRC	beta-transducin repeat containing E3 ubiquitin protein ligase
ILMN_28694	0.261482	0.0145	-3.04834	-2.93587	-1.54086	CDH2	cadherin 2
ILMN_26434	0.262334	0.0146	-3.04573	-2.93984	-0.879423	C1orf21	chromosome 1 open reading frame 21
ILMN_14465	0.262347	0.0146	3.04386	-2.94269	0.843169	EPB41L3	erythrocyte membrane protein band 4.1 like 3
ILMN_1025	0.262347	0.0147	-3.04358	-2.94312	-0.873724	ALDH5A1	aldehyde dehydrogenase 5 family member A1
ILMN_29065	0.262347	0.0147	-3.04271	-2.94446	-0.773507	SLA2	Src like adaptor 2
ILMN_23844	0.262347	0.0147	3.04268	-2.94449	0.681689	ARL6IP4	ADP ribosylation factor like GTPase 6 interacting protein 4
ILMN_3597	0.262347	0.0147	3.04225	-2.94515	0.751647	EPHA2	EPH receptor A2
ILMN_3719	0.262347	0.0147	3.04208	-2.94541	0.647297	MID1	midline 1
ILMN_8478	0.262347	0.0147	-3.04185	-2.94576	-0.640865	LURAP1	leucine rich adaptor protein 1
ILMN_18446	0.262711	0.0147	-3.04043	-2.94793	-0.623778	PABPC4	poly(A) binding protein cytoplasmic 4
ILMN_10462	0.263067	0.0148	-3.03902	-2.95007	-0.652225	CISH	cytokine inducible SH2 containing protein
ILMN_12456	0.263127	0.0148	3.03833	-2.95112	0.894446	LILRA2	leukocyte immunoglobulin like receptor A2
ILMN_4827	0.263195	0.0148	-3.03762	-2.9522	-0.486529	ZXDB	zinc finger, X-linked, duplicated B
ILMN_20602	0.263204	0.0148	-3.03571	-2.95511	-0.471953	TULP2	tubby like protein 2
ILMN_24436	0.263204	0.0148	-3.03536	-2.95566	-0.496609	LAPTM4B	lysosomal protein transmembrane 4 beta
ILMN_8062	0.263204	0.0149	-3.03323	-2.95889	-0.625125	RIDA	reactive intermediate imine deaminase A homolog
ILMN_2307	0.263204	0.0149	-3.03284	-2.95949	-0.880214	ZNF683	zinc finger protein 683
ILMN_19732	0.263204	0.0149	3.03214	-2.96057	0.544461	CHRNA10	cholinergic receptor nicotinic alpha 10 subunit
ILMN_16682	0.263204	0.0149	3.03168	-2.96126	0.743264	SMAD6	SMAD family member 6
ILMN_27143	0.263204	0.0149	-3.0313	-2.96185	-0.517353	FKBP9	FK506 binding protein 9
ILMN_29459	0.263204	0.0149	3.03126	-2.9619	0.616208	TOMM40	translocase of outer mitochondrial membrane 40
ILMN_1894	0.263204	0.0149	-3.03104	-2.96224	-0.63829	IL5RA	interleukin 5 receptor subunit alpha
ILMN_25646	0.263204	0.015	3.03045	-2.96313	1.27613	S100A9	S100 calcium binding protein A9
ILMN_21715	0.263204	0.015	3.03019	-2.96354	0.855771	LAMP3	lysosomal associated membrane protein 3
ILMN_13619	0.263204	0.015	3.02985	-2.96405	0.539442	CPA5	carboxypeptidase A5
ILMN_20257	0.263204	0.015	3.02818	-2.9666	0.571593	C1GALT1	core 1 synthase, glycoprotein-N-acetylgalactosamine 3-beta-galactosyltransferase 1
ILMN_20165	0.263204	0.015	3.02755	-2.96755	1.01132	ZNF326	zinc finger protein 326
ILMN_25145	0.263204	0.0151	-3.02613	-2.96972	-0.560273	WDR47	WD repeat domain 47
ILMN_21487	0.263204	0.0151	-3.02554	-2.97062	-0.721677	SFRP1	secreted frizzled related protein 1
ILMN_16062	0.263204	0.0151	3.025	-2.97145	1.07048	DENND1A	DENN domain containing 1A
ILMN_442	0.263204	0.0151	-3.02492	-2.97156	-0.681767	CCDC28A	coiled-coil domain containing 28A
ILMN_9078	0.263204	0.0151	-3.02399	-2.97299	-0.602316	MAP3K7CL	MAP3K7 C-terminal like
ILMN_28251	0.263204	0.0151	3.02391	-2.97311	0.633991	MAP1B	microtubule associated protein 1B
ILMN_6862	0.263204	0.0151	-3.02388	-2.97315	-1.25577	SLC7A2	solute carrier family 7 member 2
ILMN_26924	0.263204	0.0151	-3.02282	-2.97477	-1.66027	PRSS1	protease, serine 1
ILMN_25150	0.263204	0.0151	-3.02253	-2.97522	-0.497241	LOC440446	uncharacterized LOC440446
ILMN_7172	0.263204	0.0152	-3.02234	-2.9755	-0.526464	MTFR1	mitochondrial fission regulator 1
ILMN_27345	0.263204	0.0152	-3.02209	-2.97589	-1.46419	SMIM11A	small integral membrane protein 11A
ILMN_21851	0.263204	0.0152	-3.0214	-2.97693	-1.58874	AQP4	aquaporin 4
ILMN_9476	0.263204	0.0152	-3.02106	-2.97745	-0.649056	SMDT1	single-pass membrane protein with aspartate rich tail 1
ILMN_12221	0.263204	0.0152	3.02022	-2.97873	0.775879	CFI	complement factor I
ILMN_1335	0.263204	0.0152	-3.02002	-2.97903	-0.6632	C11orf71	chromosome 11 open reading frame 71
ILMN_3531	0.263204	0.0152	-3.01972	-2.9795	-1.49076	TMSB4Y	thymosin beta 4, Y-linked
ILMN_8014	0.263204	0.0152	-3.01889	-2.98077	-0.535183	SP4	Sp4 transcription factor
ILMN_25852	0.263204	0.0152	-3.01884	-2.98084	-1.13514	FAM210B	family with sequence similarity 210 member B
ILMN_16445	0.263204	0.0152	3.01869	-2.98107	0.747365	RGS16	regulator of G-protein signaling 16
ILMN_12673	0.263204	0.0152	3.01838	-2.98155	0.5472	OR2AG2	olfactory receptor family 2 subfamily AG member 2
ILMN_485	0.263204	0.0153	-3.01825	-2.98173	-0.730412	FMC1	formation of mitochondrial complex V assembly factor 1 homolog
ILMN_18780	0.263204	0.0153	3.01825	-2.98174	0.929517	C1QC	complement C1q C chain
ILMN_3867	0.263572	0.0153	3.01679	-2.98396	1.01383	IL1RN	interleukin 1 receptor antagonist
ILMN_3653	0.263572	0.0153	3.01631	-2.9847	1.28097	GBP3	guanylate binding protein 3
ILMN_9322	0.263787	0.0153	3.0149	-2.98684	0.486439	MASP1	mannan binding lectin serine peptidase 1
ILMN_18093	0.263787	0.0153	-3.01439	-2.98762	-0.517506	CPNE3	copine 3
ILMN_20134	0.263787	0.0153	-3.01421	-2.9879	-0.631687	PLEKHG6	pleckstrin homology and RhoGEF domain containing G6
ILMN_13251	0.264394	0.0154	3.01223	-2.99092	0.708798	CTTN	cortactin
ILMN_28525	0.264829	0.0154	3.01067	-2.9933	0.554229	CBX2	chromobox 2
ILMN_7332	0.264853	0.0154	-3.01008	-2.99419	-0.561669	TBC1D13	TBC1 domain family member 13
ILMN_17148	0.265572	0.0155	-3.00785	-2.9976	-0.564948	MAGED2	MAGE family member D2
ILMN_24451	0.265596	0.0155	3.00727	-2.99849	0.678376	SLC5A1	solute carrier family 5 member 1
ILMN_17455	0.265966	0.0156	3.00587	-3.00063	0.630026	CKLF	chemokine like factor
ILMN_26587	0.266746	0.0156	3.00263	-3.00556	0.738047	RPL39L	ribosomal protein L39 like
ILMN_21700	0.266746	0.0157	3.00191	-3.00666	0.510201
ILMN_12139	0.266746	0.0157	3.00164	-3.00708	0.841758	PSMB8	proteasome subunit beta 8
ILMN_9764	0.266746	0.0157	-3.00144	-3.00738	-0.534118	ZNF706	zinc finger protein 706
ILMN_22724	0.266746	0.0157	3.00139	-3.00746	0.640606	PSMC3	proteasome 26S subunit, ATPase 3
ILMN_29773	0.266746	0.0157	-3.00012	-3.00939	-0.829854	DMTN	dematin actin binding protein
ILMN_6606	0.266746	0.0157	-2.99985	-3.0098	-0.668664	CA4	carbonic anhydrase 4
ILMN_10451	0.266746	0.0157	-2.99963	-3.01014	-0.646743
ILMN_9457	0.266746	0.0157	-2.99932	-3.01062	-0.487522	MYLIP	myosin regulatory light chain interacting protein
ILMN_8028	0.267722	0.0158	-2.9965	-3.01492	-0.550412	HIGD1B	HIG1 hypoxia inducible domain family member 1B
ILMN_12353	0.267741	0.0158	-2.99568	-3.01617	-1.12169	ATP4B	ATPase H+/K+ transporting beta subunit
ILMN_138926	0.267741	0.0158	-2.99541	-3.01658	-0.630697	PQLC3	PQ loop repeat containing 3
ILMN_29157	0.267752	0.0158	-2.99421	-3.01841	-0.524308	KCTD18	potassium channel tetramerization domain containing 18
ILMN_25222	0.267752	0.0159	-2.99376	-3.0191	-0.661311	ASAP3	ArfGAP with SH3 domain, ankyrin repeat and PH domain 3
ILMN_23772	0.267752	0.0159	-2.99298	-3.02029	-0.819831	ARHGAP24	Rho GTPase activating protein 24
ILMN_10685	0.267752	0.0159	-2.9928	-3.02056	-0.497457	CDO1	cysteine dioxygenase type 1
ILMN_4735	0.267752	0.0159	2.9928	-3.02057	0.721376	OASL	2'-5'-oligoadenylate synthetase like
ILMN_18454	0.267977	0.0159	-2.99114	-3.0231	-0.469168	SIRT5	sirtuin 5
ILMN_16441	0.267977	0.0159	-2.99077	-3.02366	-0.598003	TSGA10	testis specific 10
ILMN_29225	0.267977	0.0159	-2.99046	-3.02413	-0.517808	LAMP2	lysosomal associated membrane protein 2
ILMN_6188	0.267977	0.0159	2.99021	-3.02452	0.538314	KIF15	kinesin family member 15
ILMN_28859	0.267982	0.016	-2.98933	-3.02586	-0.602418	N4BP2L2	NEDD4 binding protein 2 like 2
ILMN_27227	0.267982	0.016	2.98917	-3.02611	0.600599	MEGF11	multiple EGF like domains 11
ILMN_14324	0.26829	0.016	2.98733	-3.02892	0.663146	ENOX2	ecto-NOX disulfide-thiol exchanger 2
ILMN_16589	0.26829	0.016	-2.98719	-3.02913	-0.682697	ACADM	acyl-CoA dehydrogenase, C-4 to C-12 straight chain
ILMN_22926	0.26829	0.0161	2.98583	-3.0312	0.834803	CGN	cingulin
ILMN_3571	0.26829	0.0161	-2.98583	-3.0312	-0.626366	MCCC1	methylcrotonoyl-CoA carboxylase 1
ILMN_16546	0.26829	0.0161	2.98507	-3.03237	0.961346	HSPA5	heat shock protein family A (Hsp70) member 5
ILMN_7897	0.26829	0.0161	2.98497	-3.03252	0.945021	ADGRE2	adhesion G protein-coupled receptor E2
ILMN_20722	0.26829	0.0161	2.98486	-3.03269	0.814945	MX2	MX dynamin like GTPase 2
ILMN_19040	0.268317	0.0161	2.98428	-3.03357	0.937139	CCK	cholecystokinin
ILMN_15648	0.268376	0.0161	-2.98281	-3.03582	-0.586324	MYBPC3	myosin binding protein C, cardiac
ILMN_13608	0.268376	0.0162	2.98087	-3.03877	0.608461	SMC2	structural maintenance of chromosomes 2
ILMN_5650	0.268376	0.0162	-2.9807	-3.03903	-0.741375
ILMN_684	0.268376	0.0162	-2.98038	-3.03953	-0.637509
ILMN_28597	0.268376	0.0162	2.98017	-3.03985	0.773419	PRELID1	PRELI domain containing 1
ILMN_5756	0.268376	0.0162	2.9792	-3.04132	1.15288	PLEK	pleckstrin
ILMN_9411	0.268376	0.0162	2.97916	-3.04139	0.95736	IFI6	interferon alpha inducible protein 6
ILMN_9309	0.268376	0.0162	-2.97885	-3.04185	-0.9065	IGFBP4	insulin like growth factor binding protein 4
ILMN_29419	0.268376	0.0162	-2.97847	-3.04244	-0.715926	BBS1	Bardet-Biedl syndrome 1
ILMN_4010	0.268376	0.0163	-2.97786	-3.04338	-0.846346	DEXI	Dexi homolog
ILMN_23316	0.268376	0.0163	2.97758	-3.0438	0.491096	CLDN4	claudin 4
ILMN_22105	0.268376	0.0163	-2.97699	-3.04471	-0.780947	GNG7	G protein subunit gamma 7
ILMN_6658	0.268376	0.0163	2.97638	-3.04563	0.502885	PTRH2	peptidyl-tRNA hydrolase 2
ILMN_22391	0.268376	0.0163	2.97601	-3.04619	0.629552	LDHA	lactate dehydrogenase A
ILMN_4806	0.268376	0.0163	2.97592	-3.04634	0.587113	BCL10	B-cell CLL/lymphoma 10
ILMN_25653	0.268376	0.0163	-2.9756	-3.04683	-0.609553	SLC5A7	solute carrier family 5 member 7
ILMN_21923	0.268376	0.0163	2.97553	-3.04693	0.560306	IMPAD1	inositol monophosphatase domain containing 1
ILMN_5566	0.269307	0.0164	2.97246	-3.05163	0.522576	KRT17	keratin 17
ILMN_5603	0.269307	0.0164	-2.97234	-3.0518	-0.794711	MID1IP1	MID1 interacting protein 1
ILMN_28624	0.269523	0.0164	2.97134	-3.05333	0.562634	DOT1L	DOT1 like histone lysine methyltransferase
ILMN_2982	0.269646	0.0164	2.97055	-3.05454	0.575407	TBL3	transducin beta like 3
ILMN_4229	0.2697	0.0165	2.96992	-3.0555	0.677374	GOSR2	golgi SNAP receptor complex member 2
ILMN_8067	0.270399	0.0165	-2.96779	-3.05875	-1.22608	ADA	adenosine deaminase
ILMN_2571	0.270448	0.0165	2.96718	-3.05969	0.544934	SERPINB12	serpin family B member 12
ILMN_24259	0.270791	0.0166	2.96588	-3.06167	0.627561
ILMN_11175	0.271249	0.0166	2.96432	-3.06406	0.734681	XAF1	XIAP associated factor 1
ILMN_137467	0.271356	0.0166	-2.96316	-3.06583	-1.04164
ILMN_28136	0.271356	0.0167	2.9625	-3.06684	2.08264	MMP9	matrix metallopeptidase 9
ILMN_27923	0.271356	0.0167	-2.96237	-3.06702	-0.692184	IL31	interleukin 31
ILMN_16358	0.271356	0.0167	2.96123	-3.06877	0.601053	HMBS	hydroxymethylbilane synthase
ILMN_3949	0.271356	0.0167	2.96054	-3.06983	1.00992	ZNRF4	zinc and ring finger 4
ILMN_25884	0.271356	0.0168	2.95871	-3.07262	0.625721	PPIB	peptidylprolyl isomerase B
ILMN_12235	0.271356	0.0168	-2.9587	-3.07264	-0.510226	ABAT	4-aminobutyrate aminotransferase
ILMN_18414	0.271356	0.0168	-2.95851	-3.07293	-0.599607	WNT2B	Wnt family member 2B
ILMN_2909	0.271356	0.0168	-2.95807	-3.0736	-0.811672	GPRC5C	G protein-coupled receptor class C group 5 member C
ILMN_923	0.271356	0.0168	-2.95767	-3.07422	-1.17297	CCL11	C-C motif chemokine ligand 11
ILMN_17629	0.271356	0.0168	-2.95737	-3.07467	-0.559467	SAT2	spermidine/spermine N1-acetyltransferase family member 2
ILMN_26268	0.271356	0.0168	-2.95728	-3.07481	-0.571252	CYB5D2	cytochrome b5 domain containing 2
ILMN_15662	0.271356	0.0168	2.95664	-3.07578	0.62938	TIPIN	TIMELESS interacting protein
ILMN_8581	0.271356	0.0168	-2.95661	-3.07583	-0.484289	SERGEF	secretion regulating guanine nucleotide exchange factor
ILMN_10677	0.271356	0.0168	-2.95551	-3.0775	-1.46094	HPN	hepsin
ILMN_23918	0.271356	0.0169	2.95507	-3.07818	0.598918	CENPO	centromere protein O
ILMN_29134	0.271356	0.0169	2.955	-3.07829	0.576435	RPA3	replication protein A3
ILMN_138531	0.271356	0.0169	-2.95474	-3.07868	-0.638891	GLI2	GLI family zinc finger 2
ILMN_4889	0.271356	0.0169	-2.95444	-3.07914	-0.881373	RAB40B	RAB40B, member RAS oncogene family
ILMN_20064	0.271356	0.0169	-2.95416	-3.07957	-0.539504
ILMN_14470	0.271509	0.0169	2.95283	-3.08161	0.884758	TMEM54	transmembrane protein 54
ILMN_17945	0.271509	0.0169	-2.95261	-3.08193	-0.809567	HNMT	histamine N-methyltransferase
ILMN_14506	0.271509	0.0169	2.9519	-3.08303	0.55363	C3orf14	chromosome 3 open reading frame 14
ILMN_24753	0.271509	0.017	-2.95138	-3.08382	-0.474205	RNF170	ring finger protein 170
ILMN_25017	0.271509	0.017	-2.95115	-3.08417	-0.535302	SLC48A1	solute carrier family 48 member 1
ILMN_14057	0.271509	0.017	2.95067	-3.0849	0.664271	OR4A16	olfactory receptor family 4 subfamily A member 16
ILMN_7679	0.271509	0.017	-2.95019	-3.08564	-0.736553	PBXIP1	PBX homeobox interacting protein 1
ILMN_11191	0.271509	0.017	-2.94946	-3.08675	-1.02272	SPESP1	sperm equatorial segment protein 1
ILMN_27553	0.271509	0.017	2.94872	-3.08788	0.74153	RHOC	ras homolog family member C
ILMN_6891	0.271509	0.017	-2.94828	-3.08856	-0.74239	CALCOCO1	calcium binding and coiled-coil domain 1
ILMN_2113	0.271509	0.017	-2.9481	-3.08883	-0.74247
ILMN_21121	0.271509	0.0171	-2.94746	-3.08981	-0.657126	YBEY	ybeY metallopeptidase (putative)
ILMN_26465	0.271509	0.0171	2.94745	-3.08982	0.743855	SHROOM4	shroom family member 4
ILMN_25664	0.271641	0.0171	2.94666	-3.09103	0.465871	RANBP1	RAN binding protein 1
ILMN_21239	0.271647	0.0171	-2.94597	-3.09209	-0.494037	EIF4E3	eukaryotic translation initiation factor 4E family member 3
ILMN_18540	0.271647	0.0171	-2.94568	-3.09253	-0.463344	TUSC1	tumor suppressor candidate 1
ILMN_9017	0.271801	0.0172	-2.94405	-3.09503	-0.548809	GPM6A	glycoprotein M6A
ILMN_138786	0.271801	0.0172	2.94396	-3.09516	0.557034	GPR20	G protein-coupled receptor 20
ILMN_8146	0.271801	0.0172	2.94387	-3.0953	0.814491	NCF2	neutrophil cytosolic factor 2
ILMN_1047	0.271852	0.0172	-2.94327	-3.09622	-0.469636	DTNBP1	dystrobrevin binding protein 1
ILMN_5695	0.272195	0.0172	-2.94199	-3.09817	-0.711748	TLE2	transducin like enhancer of split 2
ILMN_139202	0.272332	0.0172	-2.94097	-3.09973	-0.698718	DCDC2	doublecortin domain containing 2
ILMN_6240	0.272332	0.0172	-2.94071	-3.10013	-0.660009	PSD3	pleckstrin and Sec7 domain containing 3
ILMN_8024	0.273796	0.0174	-2.93685	-3.10602	-1.04571	ARHGAP24	Rho GTPase activating protein 24
ILMN_9405	0.273939	0.0174	2.93604	-3.10726	0.765577	PLEK2	pleckstrin 2
ILMN_19577	0.274512	0.0174	-2.93425	-3.11	-0.566979	CMTM8	CKLF like MARVEL transmembrane domain containing 8
ILMN_10578	0.274543	0.0174	-2.9337	-3.11084	-0.884286	SAMD13	sterile alpha motif domain containing 13
ILMN_28976	0.274665	0.0175	-2.93181	-3.11374	-0.604864	METTL10	methyltransferase like 10
ILMN_18383	0.274665	0.0175	2.93117	-3.11471	0.530673
ILMN_28822	0.274665	0.0175	2.93048	-3.11576	0.835782	MANF	mesencephalic astrocyte derived neurotrophic factor
ILMN_15563	0.274665	0.0175	2.93014	-3.11628	0.488256	EPS8L3	EPS8 like 3
ILMN_28284	0.274665	0.0176	-2.92974	-3.1169	-0.502525	RNF11	ring finger protein 11
ILMN_8240	0.274665	0.0176	2.92973	-3.11692	0.685476	UTS2R	urotensin 2 receptor
ILMN_13782	0.274665	0.0176	2.92968	-3.11698	0.596682	CXorf21	chromosome X open reading frame 21
ILMN_3105	0.274665	0.0176	-2.92959	-3.11713	-0.626779	BTF3L4	basic transcription factor 3 like 4
ILMN_29212	0.275126	0.0176	2.92778	-3.11989	0.477387	TDG	thymine DNA glycosylase
ILMN_2997	0.275126	0.0176	2.92746	-3.12037	0.849928	ALOX5	arachidonate 5-lipoxygenase
ILMN_4376	0.275126	0.0176	2.92692	-3.1212	0.523573	ANKRD42	ankyrin repeat domain 42
ILMN_4457	0.275126	0.0176	2.92662	-3.12166	0.647203	LETM2	leucine zipper and EF-hand containing transmembrane protein 2
ILMN_29563	0.275263	0.0177	-2.92584	-3.12286	-0.568531	SPAG7	sperm associated antigen 7
ILMN_2923	0.275994	0.0177	-2.92368	-3.12616	-0.686272
ILMN_711	0.275994	0.0178	-2.92162	-3.12931	-0.598377	CYP2U1	cytochrome P450 family 2 subfamily U member 1
ILMN_8921	0.275994	0.0178	-2.92162	-3.12931	-0.477431	EPC1	enhancer of polycomb homolog 1
ILMN_2670	0.275994	0.0178	-2.92127	-3.12985	-0.708146	KLF9	Kruppel like factor 9
ILMN_29505	0.275994	0.0178	2.92025	-3.1314	0.80803	NCLN	nicalin
ILMN_29414	0.275994	0.0178	2.92002	-3.13176	1.14425	PRSS2	protease, serine 2
ILMN_8579	0.275994	0.0178	-2.91931	-3.13284	-5.07888	RPS4Y1	ribosomal protein S4, Y-linked 1
ILMN_22000	0.275994	0.0179	2.91914	-3.1331	0.593716	LYNX1	Ly6/neurotoxin 1
ILMN_26221	0.275994	0.0179	2.91911	-3.13315	1.12428	SLAMF8	SLAM family member 8
ILMN_3124	0.275994	0.0179	2.919	-3.13332	0.547271	RFWD3	ring finger and WD repeat domain 3
ILMN_138873	0.275994	0.0179	-2.91852	-3.13405	-0.597705	PHYH	phytanoyl-CoA 2-hydroxylase
ILMN_19563	0.275994	0.0179	-2.91849	-3.1341	-0.539192	USP53	ubiquitin specific peptidase 53
ILMN_29648	0.276009	0.0179	-2.91798	-3.13487	-0.464487	PPM1B	protein phosphatase, Mg2+/Mn2+ dependent 1B
ILMN_11331	0.276034	0.0179	-2.91745	-3.13568	-0.479947	PPP2R5A	protein phosphatase 2 regulatory subunit B'alpha
ILMN_14950	0.276034	0.0179	2.91653	-3.13709	0.513615	KCNS1	potassium voltage-gated channel modifier subfamily S member 1
ILMN_17780	0.276034	0.0179	2.91651	-3.13712	0.495791	HES5	hes family bHLH transcription factor 5
ILMN_8119	0.276152	0.0179	2.91577	-3.13825	0.551895	ADH1A	alcohol dehydrogenase 1A (class I), alpha polypeptide
ILMN_30242	0.276203	0.018	-2.9149	-3.13959	-0.916214	PER3	period circadian clock 3
ILMN_25527	0.276203	0.018	-2.91472	-3.13986	-0.671988	TBC1D9	TBC1 domain family member 9
ILMN_4956	0.276911	0.018	-2.91264	-3.14303	-0.575258	MAML3	mastermind like transcriptional coactivator 3
ILMN_30362	0.276921	0.018	-2.91215	-3.14378	-0.530348	F8	coagulation factor VIII
ILMN_19336	0.277892	0.0181	-2.90949	-3.14786	-0.55944	INSL6	insulin like 6
ILMN_1298	0.277988	0.0182	-2.90826	-3.14974	-0.484451	SPERT	spermatid associated
ILMN_2618	0.277988	0.0182	2.90788	-3.15032	0.537708	POLD1	DAN polymerase delta 1, catalytic subunit
ILMN_8471	0.277988	0.0182	2.90787	-3.15034	0.502367	SLC16A1	solute carrier family 16 member 1
ILMN_8453	0.278604	0.0182	-2.90598	-3.15322	-0.587661	TMEM143	transmembrane protein 143
ILMN_10957	0.278604	0.0182	2.90555	-3.15389	0.734419	GALK2	galactokinase 2
ILMN_7259	0.278834	0.0183	-2.90275	-3.15817	-0.479128	SRGAP2	SLIT-ROBO Rho GTPase activating protein 2
ILMN_12662	0.278834	0.0183	2.90265	-3.15831	0.903429	ITGA2	integrin subunit alpha 2
ILMN_9957	0.278834	0.0183	-2.90251	-3.15854	-0.71276	MTCP1	mature T-cell proliferation 1
ILMN_13615	0.278834	0.0184	2.90065	-3.16138	0.541678	ELF3	E74 like ETS transcription factor 3
ILMN_19455	0.278834	0.0184	2.8999	-3.16253	0.796371	C1orf162	chromosome 1 open reading frame 162
ILMN_24627	0.278834	0.0184	2.89898	-3.16394	0.912135	IL2RA	interleukin 2 receptor subunit alpha
ILMN_14301	0.278834	0.0184	2.89894	-3.164	0.506374	RELL2	RELT like 2
ILMN_26794	0.278834	0.0185	-2.89829	-3.165	-0.730854
ILMN_21738	0.278834	0.0185	-2.8979	-3.16558	-0.49477	AGXT	alanine-glyoxylate aminotransferase
ILMN_4679	0.278834	0.0185	-2.89725	-3.16658	-0.763531	KHDRBS3	KH RNA binding domain containing, signal transduction associated 3
ILMN_20390	0.278834	0.0185	2.89724	-3.16659	0.659044	PGD	phosphogluconate dehydrogenase
ILMN_26071	0.278834	0.0185	-2.89724	-3.1666	-0.594093	GPR155	G protein-coupled receptor 155
ILMN_28160	0.278834	0.0185	2.89712	-3.16677	0.636786	ACTN1	actinin alpha 1
ILMN_516	0.278834	0.0185	-2.89703	-3.16692	-0.86979	CYB5R1	cytochrome b5 reductase 1
ILMN_26039	0.278834	0.0185	-2.89641	-3.16786	-0.785586	SSX7	SSX family member 7
ILMN_10933	0.278834	0.0185	2.89615	-3.16826	0.603908
ILMN_3579	0.278834	0.0185	-2.89582	-3.16877	-0.609299	GSX1	GS homeobox 1
ILMN_18472	0.278834	0.0185	2.89525	-3.16964	0.571141	C4orf19	chromosome 4 open reading frame 19
ILMN_23585	0.278834	0.0185	2.89517	-3.16976	0.513244	H2AFX	H2A histone family member X
ILMN_18784	0.278834	0.0186	-2.89482	-3.1703	-0.560921	PLEKHA3	pleckstrin homology domain containing A3
ILMN_13794	0.278834	0.0186	-2.89422	-3.17121	-0.476002	NIPAL3	NIPA like domain containing 3
ILMN_23284	0.278834	0.0186	-2.89353	-3.17227	-0.544152	SLC35A1	solute carrier family 35 member A1
ILMN_12926	0.278834	0.0186	2.8925	-3.17385	0.895427	PARP9	poly(ADP-ribose) polymerase family member 9
ILMN_20957	0.278834	0.0186	-2.89233	-3.17411	-0.704059	WBP1	WW domain binding protein 1
ILMN_6133	0.278834	0.0186	2.89172	-3.17503	0.784939	SUV39H1	suppressor of variegation 3-9 homolog 1
ILMN_12746	0.278834	0.0187	2.89112	-3.17596	0.546242	ZBTB1	zinc finger and BTB domain containing 1
ILMN_29169	0.278834	0.0187	-2.89099	-3.17616	-0.537224	ATP5J	ATP synthase, H+ transporting, mitochondrial Fo complex subunit F6
ILMN_28360	0.278834	0.0187	2.89061	-3.17674	0.537831	CHTF18	chromosome transmission fidelity factor 18
ILMN_19794	0.278834	0.0187	2.8902	-3.17737	0.750875	TMEM234	transmembrane protein 234
ILMN_23097	0.278834	0.0187	-2.88988	-3.17785	-0.64359	LRRC4	leucine rich repeat containing 4
ILMN_13260	0.278834	0.0187	2.88954	-3.17838	0.844512
ILMN_6687	0.278834	0.0187	2.88944	-3.17852	1.03916
ILMN_11361	0.278834	0.0187	2.88912	-3.17901	0.528298	MFSD12	major facilitator superfamily domain containing 12
ILMN_5157	0.278834	0.0187	2.88897	-3.17925	0.612011	BORA	bora, aurora kinase A activator
ILMN_23100	0.278834	0.0187	-2.88894	-3.17929	-0.454178	RAB28	RAB28, member RAS oncogene family
ILMN_29888	0.278962	0.0188	-2.8881	-3.18057	-0.61568	PRMT6	protein arginine methyltransferase 6
ILMN_21793	0.278962	0.0188	-2.88775	-3.18112	-0.677719	BHLHE41	basic helix-loop-helix family member e41
ILMN_16892	0.279519	0.0188	-2.88572	-3.18421	-0.503015	RHOBTB1	Rho related BTB domain containing 1
ILMN_22286	0.279519	0.0188	-2.88508	-3.1852	-1.00826	MT1G	metallothionein 1G
ILMN_4891	0.279519	0.0188	2.88505	-3.18524	0.547177
ILMN_16206	0.279519	0.0189	2.88469	-3.1858	0.576003	PLA2G2E	phospholipase A2 group IIE
ILMN_18883	0.279935	0.0189	-2.8833	-3.18792	-0.910204	ACADL	acyl-CoA dehydrogenase, long chain
ILMN_3909	0.280031	0.0189	-2.88215	-3.18968	-0.565068	B3GNT8	UDP-GlcNAc:betaGal beta-1,3-N-acetylglucosaminyltransferase 8
ILMN_3785	0.280031	0.019	2.88144	-3.19076	0.555324	ATP1B3	ATPase Na+/K+ transporting subunit beta 3
ILMN_23885	0.280031	0.019	-2.88132	-3.19096	-0.670554	SORBS3	sorbin and SH3 domain containing 3
ILMN_30243	0.280031	0.019	2.88129	-3.191	0.981187	CXCR2	C-X-C motif chemokine receptor 2
ILMN_11893	0.280098	0.019	2.88047	-3.19225	0.639621
ILMN_19137	0.280098	0.019	-2.87972	-3.1934	-1.34449	MFSD4A	major facilitator superfamily domain containing 4A
ILMN_15876	0.280098	0.019	-2.87971	-3.19342	-0.513767	SLC26A5	solute carrier family 26 member 5
ILMN_12704	0.280098	0.019	-2.87934	-3.19399	-0.520314	AGA	aspartylglucosaminidase
ILMN_138534	0.280394	0.0191	2.87814	-3.19582	0.495469	ELMO1	engulfment and cell motility 1
ILMN_23823	0.280394	0.0191	-2.87778	-3.19637	-0.590608	DHTKD1	dehydrogenase E1 and transketolase domain containing 1
ILMN_16454	0.280477	0.0191	-2.87692	-3.19768	-0.691085	GRAMD1C	GRAM domain containing 1C
ILMN_1504	0.280477	0.0191	2.8767	-3.19802	2.31329	MMP12	matrix metallopeptidase 12
ILMN_27218	0.2805	0.0192	-2.8729	-3.20383	-1.20177	TCEA3	transcription elongation factor A3
ILMN_6001	0.2805	0.0192	2.87288	-3.20387	0.580613	SOX14	SRY-box 14
ILMN_9152	0.2805	0.0192	2.87271	-3.20413	1.1077	TMEM44	transmembrane protein 44
ILMN_2037	0.2805	0.0192	2.87251	-3.20444	0.604676	H2AFY	H2A histone family member Y
ILMN_5728	0.2805	0.0192	-2.87222	-3.20488	-0.584473	LIPT1	lipoyltransferase 1
ILMN_12450	0.2805	0.0192	-2.87196	-3.20528	-0.564065	RAD17	RAD17 checkpoint clamp loader component
ILMN_13414	0.2805	0.0193	-2.87147	-3.20603	-0.714146	BTBD3	BTB domain containing 3
ILMN_8363	0.2805	0.0193	2.87137	-3.20618	0.453658	ESPL1	extra spindle pole bodies like 1, separase
ILMN_5819	0.2805	0.0193	2.87116	-3.2065	0.592504	DNAJA1	DnaJ heat shock protein family (Hsp40) member A1
ILMN_26928	0.2805	0.0193	2.87085	-3.20697	0.571905	FAM109A	family with sequence similarity 109 member A
ILMN_16048	0.2805	0.0193	-2.87077	-3.20709	-0.554332	GARNL3	GTPase activating Rap/RanGAP domain like 3
ILMN_10449	0.2805	0.0193	-2.8703	-3.20781	-0.701364	CXXC5	CXXC finger protein 5
ILMN_27637	0.2805	0.0193	-2.87023	-3.20792	-0.474861	CALN1	calneuron 1
ILMN_28968	0.2805	0.0193	2.87002	-3.20824	0.541191
ILMN_3037	0.2805	0.0193	-2.86989	-3.20845	-0.577811	EIF1	eukaryotic translation initiation factor 1
ILMN_16873	0.2805	0.0193	-2.86953	-3.20899	-0.548754	C3orf58	chromosome 3 open reading frame 58
ILMN_5436	0.281129	0.0194	-2.86769	-3.21182	-0.58175	FAM104B	family with sequence similarity 104 member B
ILMN_28228	0.281395	0.0195	-2.86438	-3.21687	-0.55541	RRAGB	Ras related GTP binding B
ILMN_8974	0.281395	0.0195	-2.86424	-3.2171	-0.82934	CKMT2	creatine kinase, mitochondrial 2
ILMN_807	0.281395	0.0195	2.86419	-3.21717	0.59125	SNRPD1	small nuclear ribonucleoprotein D1 polypeptide
ILMN_3307	0.281395	0.0195	2.86406	-3.21736	1.04013	BATF	basic leucine zipper ATF-like transcription factor
ILMN_8404	0.281395	0.0195	-2.86329	-3.21854	-0.569517	COX7A2L	cytochrome c oxidase subunit 7A2 like
ILMN_5443	0.281395	0.0195	-2.86314	-3.21877	-0.546402
ILMN_10263	0.281395	0.0195	-2.86282	-3.21926	-0.531704	TIAM2	T-cell lymphoma invasion and metastasis 2
ILMN_23293	0.281395	0.0196	-2.86176	-3.22089	-0.616138	F8A1	coagulation factor VIII-associated 1
ILMN_10153	0.281395	0.0196	-2.8614	-3.22144	-0.51153	ZNF480	zinc finger protein 480
ILMN_9350	0.281395	0.0196	2.86122	-3.22172	0.756397	P2RY13	purinergic receptor P2Y13
ILMN_1754	0.281395	0.0196	-2.86107	-3.22194	-0.520284
ILMN_11136	0.281395	0.0196	-2.86089	-3.22221	-1.21394	PTGER3	prostaglandin E receptor 3
ILMN_3475	0.281395	0.0196	2.8608	-3.22235	0.640196	ZWILCH	zwilch kinetochore protein
ILMN_767	0.281395	0.0196	2.86053	-3.22277	0.496072
ILMN_24863	0.281395	0.0196	-2.8605	-3.22281	-1.77633	GRIA4	glutamate ionotropic receptor AMPA type subunit 4
ILMN_17151	0.281436	0.0196	2.85997	-3.22362	0.670485	RENBP	renin binding protein
ILMN_11580	0.28159	0.0196	2.8592	-3.22481	0.541742	TUBA8	tubulin alpha 8
ILMN_28126	0.281724	0.0197	2.85832	-3.22615	0.526032	INVS	inversin
ILMN_12769	0.281724	0.0197	-2.85803	-3.2266	-0.51558	ADAT2	adenosine deaminase, tRNA specific 2
ILMN_9420	0.282208	0.0197	2.85649	-3.22895	0.649567	BAG3	BCL2 associated athanogene 3
ILMN_138156	0.282208	0.0197	2.85608	-3.22958	1.67746	RSAD2	radical S-adenosyl methionine domain containing 2
ILMN_16698	0.282334	0.0198	-2.85537	-3.23067	-1.10045	TRIM36	tripartite motif containing 36
ILMN_11980	0.282455	0.0198	-2.85466	-3.23175	-0.558517	OR4F17	olfactory receptor family 4 subfamily F member 17
ILMN_12686	0.282526	0.0198	-2.85407	-3.23266	-0.512793	DHRS7	dehydrogenase/reductase 7
ILMN_26372	0.282977	0.0198	-2.85264	-3.23485	-0.49721	HCAR2	hydroxycarboxylic acid receptor 2
ILMN_136965	0.283067	0.0199	-2.852	-3.23582	-0.87278	B3GALNT1	beta-1,3-N-acetylgalactosaminyltransferase 1 (globoside blood group)
ILMN_28761	0.283557	0.0199	2.84964	-3.23943	0.634359	STIP1	stress induced phosphoprotein 1
ILMN_10249	0.283557	0.0199	2.84959	-3.23951	1.04796	UGT1A6	UDP glucuronosyltransferase family 1 member A6
ILMN_19559	0.283557	0.0199	2.84958	-3.23953	0.553409	CPNE6	copine 6
ILMN_29423	0.283557	0.02	-2.8488	-3.24073	-0.515198	USP20	ubiquitin specific peptidase 20
ILMN_21973	0.283557	0.02	-2.84863	-3.24098	-0.737278	CAPS	calcyphosine
ILMN_28517	0.283557	0.02	2.84752	-3.24268	0.716485	PARP14	poly(ADP-ribose) polymerase family member 14
ILMN_15046	0.283557	0.02	-2.84743	-3.24282	-0.52992	THAP12	THAP domain containing 12
ILMN_12329	0.283557	0.02	-2.84733	-3.24298	-0.546042	ORMDL3	ORMDL sphingolipid biosynthesis regulator 3
ILMN_9305	0.283557	0.02	-2.84703	-3.24343	-0.534011	CXorf40A	chromosome X open reading frame 40A
ILMN_18862	0.283943	0.0201	2.84575	-3.24539	0.480544	PRR25	proline rich 25
ILMN_1531	0.284421	0.0201	-2.84427	-3.24766	-0.85077	PFN2	profilin 2
ILMN_14880	0.284901	0.0202	2.84278	-3.24994	0.755982	NFIL3	nuclear factor, interleukin 3 regulated
ILMN_4631	0.28552	0.0202	-2.84099	-3.25268	-1.11038	CXCL12	C-X-C motif chemokine ligand 12
ILMN_29954	0.285883	0.0203	2.83977	-3.25455	0.612627	SPDL1	spindle apparatus coiled-coil protein 1
ILMN_138662	0.286008	0.0203	-2.83898	-3.25576	-0.670969
ILMN_3411	0.286008	0.0203	-2.83853	-3.25644	-0.743913	MAL	mal, T-cell differentiation protein
ILMN_8830	0.286008	0.0203	2.83821	-3.25694	0.913328	ANXA2	annexin A2
ILMN_25752	0.286147	0.0204	-2.83655	-3.25948	-0.67893	CTH	cystathionine gamma-lyase
ILMN_16087	0.286147	0.0204	2.83635	-3.25979	0.672707	ARMC9	armadillo repeat containing 9
ILMN_5316	0.286147	0.0204	-2.83625	-3.25994	-1.3112	MB	myoglobin
ILMN_4103	0.286147	0.0204	2.83568	-3.26082	0.501164	ARL6IP1	ADP ribosylation factor like GTPase 6 interacting protein 1
ILMN_29015	0.286147	0.0204	-2.83399	-3.26339	-0.492107	KIAA0040	KIAA0040
ILMN_14789	0.286147	0.0205	2.8333	-3.26445	0.477771	RRM1	ribonucleotide reductase catalytic subunit M1
ILMN_20365	0.286147	0.0205	-2.83315	-3.26468	-0.445167	BAD	BCL2 associated agonist of cell death
ILMN_12740	0.286147	0.0205	2.83312	-3.26472	1.16573	CDH3	cadherin 3
ILMN_23180	0.286147	0.0205	2.83305	-3.26484	0.826858	IFI30	IFI30, lysosomal thiol reductase
ILMN_19658	0.286147	0.0205	-2.83279	-3.26524	-0.468027	RHOU	ras homolog family member U
ILMN_138267	0.286147	0.0205	2.83169	-3.26693	0.939156	ITGB2	integrin subunit beta 2
ILMN_22848	0.286147	0.0205	-2.83139	-3.26738	-0.546529	RNF41	ring finger protein 41
ILMN_9982	0.286147	0.0206	2.83079	-3.2683	0.776556	FXYD5	FXYD domain containing ion transport regulator 5
ILMN_25159	0.286147	0.0206	-2.83075	-3.26836	-0.718563	BVES	blood vessel epicardial substance
ILMN_26792	0.286147	0.0206	-2.83068	-3.26847	-0.631531	OBP2B	odorant binding protein 2B
ILMN_6879	0.286147	0.0206	-2.8302	-3.2692	-0.499389	RUSC2	RUN and SH3 domain containing 2
ILMN_25949	0.286147	0.0206	-2.82913	-3.27084	-0.567658	DEGS2	delta 4-desaturase, sphingolipid 2
ILMN_14667	0.286147	0.0206	2.8291	-3.27089	0.479263	SNRPB	small nuclear ribonucleoprotein polypeptides B and B1
ILMN_5617	0.286147	0.0206	2.82893	-3.27114	0.571604	NUP62CL	nucleoporin 62 C-terminal like
ILMN_18447	0.286147	0.0206	-2.82879	-3.27135	-0.469436	KCNAB3	potassium voltage-gated channel subfamily A regulatory beta subunit 3
ILMN_26272	0.286147	0.0206	-2.82841	-3.27194	-0.586786	SNX7	sorting nexin 7
ILMN_137876	0.286147	0.0207	2.82772	-3.273	0.525792	RPL34	ribosomal protein L34
ILMN_9806	0.286147	0.0207	-2.8276	-3.27319	-0.729982	RAB17	RAB17, member RAS oncogene family
ILMN_138636	0.286147	0.0207	2.82734	-3.27358	0.540679	CFTR	cystic fibrosis transmembrane conductance regulator
ILMN_26857	0.286147	0.0207	2.82729	-3.27366	0.644523	AXIN2	axin 2
ILMN_30294	0.286434	0.0207	-2.82607	-3.27553	-0.548148	TAS2R8	taste 2 receptor member 8
ILMN_26163	0.286434	0.0207	2.82582	-3.2759	0.52159	SIGLEC10	sialic acid binding Ig like lectin 10
ILMN_16372	0.286631	0.0207	2.82497	-3.27721	0.819438	TNFAIP2	TNF alpha induced protein 2
ILMN_2491	0.287051	0.0208	-2.82364	-3.27925	-0.576251	PCBP2	poly(rC) binding protein 2
ILMN_11423	0.287108	0.0208	2.82309	-3.28009	0.657156	RGS3	regulator of G-protein signaling 3
ILMN_21669	0.287504	0.0208	-2.82181	-3.28205	-0.819876	KIAA0319L	KIAA0319 like
ILMN_14522	0.288099	0.0209	2.8201	-3.28467	0.615953	LOC400997	uncharacterized LOC400997
ILMN_17871	0.288281	0.0209	-2.81889	-3.28653	-0.846265	MESP1	mesoderm posterior bHLH transcription factor 1
ILMN_13514	0.288281	0.021	-2.81834	-3.28736	-0.573897
ILMN_13286	0.288281	0.021	-2.8183	-3.28742	-0.494885	ZNF624	zinc finger protein 624
ILMN_23370	0.288281	0.021	-2.81803	-3.28784	-0.509621	SH3BGR	SH3 domain binding glutamate rich protein
ILMN_4997	0.289242	0.0211	2.81553	-3.29166	0.578145	AIMP2	aminoacyl tRNA synthetase complex interacting multifunctional protein 2
ILMN_14680	0.289323	0.0211	2.81487	-3.29268	0.508662	LECT1	leukocyte cell derived chemotaxin 1
ILMN_11371	0.289323	0.0211	2.81452	-3.29321	0.574002
ILMN_27978	0.289596	0.0211	-2.81325	-3.29516	-1.01142	TMEM151A	transmembrane protein 151A
ILMN_29302	0.289596	0.0211	-2.81289	-3.29571	-0.917895	PDE4A	phosphodiesterase 4A
ILMN_22596	0.289596	0.0212	-2.81264	-3.29609	-0.570785	KAT2B	lysine acetyltransferase 2B
ILMN_23399	0.289596	0.0212	2.81199	-3.29708	0.540146	TUBB	tubulin beta class I
ILMN_20023	0.289596	0.0212	2.81168	-3.29756	0.491689	TSSC1	tumor suppressing subtransferable candidate 1
ILMN_1802	0.289596	0.0212	-2.81144	-3.29793	-0.645002	DLL1	delta like canonical Notch ligand 1
ILMN_16171	0.289665	0.0212	2.81039	-3.29954	0.44632	FGF14	fibroblast growth factor 14
ILMN_19935	0.289665	0.0213	-2.80882	-3.30195	-0.620335	APLP2	amyloid beta precursor like protein 2
ILMN_17664	0.289665	0.0213	-2.80881	-3.30195	-0.486174	DCTD	dCMP deaminase
ILMN_12251	0.289665	0.0213	-2.80869	-3.30214	-0.677344	RPS6KA2	ribosomal protein S6 kinase A2
ILMN_21470	0.289665	0.0213	2.80781	-3.30348	0.515939	WDHD1	WD repeat and HMG-box DNA binding protein 1
ILMN_5582	0.289665	0.0213	-2.80769	-3.30367	-0.581713	SLC30A2	solute carrier family 30 member 2
ILMN_13852	0.289665	0.0213	-2.80756	-3.30387	-0.541131	KCNJ5	potassium voltage-gated channel subfamily J member 5
ILMN_2120	0.289665	0.0213	-2.80726	-3.30433	-0.65948	IMPACT	impact RWD domain protein
ILMN_25698	0.289665	0.0213	-2.80705	-3.30465	-1.03339	LARP6	La ribonucleoprotein domain family member 6
ILMN_25550	0.289665	0.0214	-2.8065	-3.30549	-0.544403	MSI1	musashi RNA binding protein 1
ILMN_11095	0.289665	0.0214	2.80649	-3.30551	0.470239	CSNK1D	casein kinase 1 delta
ILMN_20324	0.289665	0.0214	-2.8062	-3.30595	-0.445671	TOB2	transducer of ERBB2, 2
ILMN_18406	0.289665	0.0214	2.80592	-3.30639	0.789337	TLR8	toll like receptor 8
ILMN_2693	0.291484	0.0215	-2.80124	-3.31355	-0.438462	SKP1	S-phase kinase-associated protein 1
ILMN_29408	0.291484	0.0215	-2.80118	-3.31364	-0.720853	LGSN	lengsin, lens protein with glutamine synthetase domain
ILMN_27419	0.292108	0.0216	-2.79905	-3.3169	-0.690344	TRIM63	tripartite motif containing 63
ILMN_9318	0.292108	0.0216	2.79902	-3.31694	0.508258	B9D1	B9 domain containing 1
ILMN_8319	0.292212	0.0216	2.79834	-3.31799	0.786738	OR10G8	olfactory receptor family 10 subfamily G member 8
ILMN_21930	0.292212	0.0217	2.79782	-3.31879	1.15582	FGR	FGR proto-oncogene, Src family tyrosine kinase
ILMN_7569	0.292212	0.0217	-2.79717	-3.31978	-0.496564	TP53TG5	TP53 target 5
ILMN_6958	0.292212	0.0217	2.79716	-3.3198	0.508675	CD180	CD180 molecule
ILMN_6361	0.292888	0.0218	-2.79531	-3.32263	-0.595066	DPP7	dipeptidyl peptidase 7
ILMN_2233	0.292966	0.0218	2.79473	-3.32352	0.583535	LPL	lipoprotein lipase
ILMN_17947	0.293002	0.0218	-2.79407	-3.32453	-0.563522	LRRC37A3	leucine rich repeat containing 37 member A3
ILMN_5224	0.293002	0.0218	-2.79375	-3.32501	-0.769655	GABARAPL1	GABA type A receptor associated protein like 1
ILMN_138249	0.293002	0.0218	2.79343	-3.32551	0.541433
ILMN_17810	0.293055	0.0219	2.79224	-3.32733	1.01987	REG1A	regenerating family member 1 alpha
ILMN_13625	0.293055	0.0219	2.79207	-3.32759	0.465552	TRIM7	tripartite motif containing 7
ILMN_15363	0.293055	0.0219	2.79196	-3.32776	0.653233	NIPAL1	NIPA like domain containing 1
ILMN_17850	0.293055	0.0219	2.79141	-3.32861	0.510094	CDR1	cerebellar degeneration related protein 1
ILMN_2413	0.293055	0.0219	-2.79083	-3.3295	-0.50783	THAP5	THAP domain containing 5
ILMN_22332	0.293055	0.0219	-2.79028	-3.33034	-0.569139	MTFR1L	mitochondrial fission regulator 1 like
ILMN_21780	0.293055	0.0219	-2.78965	-3.33129	-0.528666	ZNF345	zinc finger protein 345
ILMN_9846	0.293055	0.022	2.78943	-3.33164	0.458875
ILMN_19973	0.293055	0.022	-2.7886	-3.33291	-0.600135	NPAS4	neuronal PAS domain protein 4
ILMN_24866	0.293055	0.022	-2.788	-3.33383	-0.472867	NTN1	netrin 1
ILMN_4441	0.293055	0.022	2.78789	-3.334	0.804397	PLSCR1	phospholipid scramblase 1
ILMN_138009	0.293055	0.022	2.7875	-3.33459	0.553832	NUP50	nucleoporin 50
ILMN_27026	0.293055	0.022	-2.78749	-3.3346	-0.480205	TMEM141	transmembrane protein 141
ILMN_29446	0.293055	0.0221	-2.78666	-3.33587	-0.534829	MYO16	myosin XVI
ILMN_760	0.293055	0.0221	2.78582	-3.33716	0.666491	TRIM5	tripartite motif containing 5
ILMN_11665	0.293055	0.0221	-2.78568	-3.33738	-0.603216	CRBN	cereblon
ILMN_439	0.293055	0.0221	2.78498	-3.33845	0.684099	ACRV1	acrosomal vesicle protein 1
ILMN_1715	0.293055	0.0221	-2.78494	-3.33851	-0.694491	ADSSL1	adenylosuccinate synthase like 1
ILMN_23866	0.293055	0.0221	2.78478	-3.33876	0.51666	FOXRED1	FAD dependent oxidoreductase domain containing 1
ILMN_16832	0.293055	0.0221	2.78472	-3.33886	0.565358	IARS	isoleucyl-tRNA synthetase
ILMN_13886	0.293055	0.0221	-2.78419	-3.33965	-0.511307	MAGI1	membrane associated guanylate kinase, WW and PDZ domain containing 1
ILMN_18691	0.293055	0.0221	-2.78398	-3.33999	-0.679701	SCML4	sex comb on midleg-like 4 (Drosophila)
ILMN_29224	0.293055	0.0222	2.78389	-3.34012	0.580954	MED18	mediator complex subunit 18
ILMN_137637	0.293055	0.0222	2.78361	-3.34055	0.691396	CAPZA1	capping actin protein of muscle Z-line alpha subunit 1
ILMN_23994	0.293159	0.0222	-2.78281	-3.34177	-0.611308	CLN5	ceroid-lipofuscinosis, neuronal 5
ILMN_8474	0.293159	0.0222	-2.78232	-3.34253	-0.53611	PTGR2	prostaglandin reductase 2
ILMN_515	0.293159	0.0222	2.7816	-3.34363	0.533479	RFC2	replication factor C subunit 2
ILMN_21347	0.293159	0.0222	-2.78154	-3.34372	-0.493394	DPH1	diphthamide biosynthesis 1
ILMN_15597	0.293159	0.0223	2.7804	-3.34547	0.542884	ALYREF	Aly/REF export factor
ILMN_20491	0.293159	0.0223	2.78028	-3.34565	0.701367	SPATA6	spermatogenesis associated 6
ILMN_25640	0.293159	0.0223	-2.77974	-3.34648	-0.52849	TMCO5A	transmembrane and coiled-coil domains 5A
ILMN_3720	0.293159	0.0223	-2.77922	-3.34727	-0.576276	MN1	MN1 proto-oncogene, transcriptional regulator
ILMN_2825	0.293159	0.0224	-2.77831	-3.34867	-0.782196	SLC41A1	solute carrier family 41 member 1
ILMN_19642	0.293159	0.0224	2.77746	-3.34996	0.674329	MAX	MYC associated factor X
ILMN_9685	0.293159	0.0224	2.77734	-3.35015	0.571458	KRT8	keratin 8
ILMN_25028	0.293159	0.0224	-2.77718	-3.3504	-1.11574	TF	transferrin
ILMN_29577	0.293159	0.0224	2.77647	-3.35149	0.79605	HSD17B13	hydroxysteroid 17-beta dehydrogenase 13
ILMN_24700	0.293159	0.0224	-2.77629	-3.35175	-0.513355	CYB5A	cytochrome b5 type A
ILMN_10773	0.293159	0.0224	2.77608	-3.35208	0.54075	TMEM106A	transmembrane protein 106A
ILMN_2716	0.293159	0.0224	-2.77605	-3.35213	-0.456696	GRB14	growth factor receptor bound protein 14
ILMN_9559	0.293159	0.0224	-2.77602	-3.35217	-0.499686	IFNA16	interferon alpha 16
ILMN_15086	0.293159	0.0224	-2.77595	-3.35229	-0.515667	CROCC	ciliary rootlet coiled-coil, rootletin
ILMN_27201	0.293159	0.0224	2.77581	-3.35249	0.605914	RGL1	ral guanine nucleotide dissociation stimulator like 1
ILMN_22875	0.293384	0.0225	-2.77494	-3.35383	-0.519711	ZNF208	zinc finger protein 208
ILMN_21166	0.294108	0.0226	2.77249	-3.35759	0.928011	NAMPT	nicotinamide phosphoribosyltransferase
ILMN_16787	0.294108	0.0226	-2.77191	-3.35847	-0.753583	ZNF219	zinc finger protein 219
ILMN_9232	0.294108	0.0226	-2.77168	-3.35882	-0.446106	OSBPL9	oxysterol binding protein like 9
ILMN_12384	0.294108	0.0226	2.77159	-3.35896	0.697218	NPFFR1	neuropeptide FF receptor 1
ILMN_30050	0.294108	0.0226	-2.77142	-3.35922	-0.625489	FZD8	frizzled class receptor 8
ILMN_14179	0.295216	0.0227	2.76868	-3.36342	0.766188	DNAJB11	DnaJ heat shock protein family (Hsp40) member B11
ILMN_27075	0.29572	0.0228	-2.76718	-3.36571	-0.445978	NLGN4X	neuroligin 4, X-linked
ILMN_25836	0.29572	0.0228	-2.76682	-3.36626	-0.965432	METRN	meteorin, glial cell differentiation regulator
ILMN_1261	0.295849	0.0228	2.76616	-3.36728	1.25524	AGT	angiotensinogen
ILMN_14082	0.29597	0.0228	-2.76551	-3.36827	-0.525935	STAG2	stromal antigen 2
ILMN_24997	0.29613	0.0228	2.76478	-3.36939	1.13808	TRIM15	tripartite motif containing 15
ILMN_14231	0.296796	0.0229	2.76285	-3.37235	2.59246	CEACAM7	carcinoembryonic antigen related cell adhesion molecule 7
ILMN_26557	0.296796	0.0229	-2.76239	-3.37305	-0.560587	PPP3R2	protein phosphatase 3 regulatory subunit B, beta
ILMN_3900	0.296796	0.0229	-2.7622	-3.37334	-0.593954
ILMN_7413	0.297004	0.023	2.76137	-3.37461	0.748048	TTF2	transcription termination factor 2
ILMN_29267	0.29743	0.023	-2.75975	-3.3771	-0.485192	ALOX12	arachidonate 12-lipoxygenase, 12S type
ILMN_9282	0.29743	0.023	-2.75957	-3.37737	-0.758982	NECAB3	N-terminal EF-hand calcium binding protein 3
ILMN_11062	0.29743	0.023	-2.75921	-3.37792	-0.569942	FARP2	FERM, ARH/RhoGEF and pleckstrin domain protein 2
ILMN_20437	0.29743	0.0231	-2.75891	-3.37838	-0.497383	FAM134A	family with sequence similarity 134 member A
ILMN_29873	0.297791	0.0231	-2.75715	-3.38108	-0.58559	COQ10A	coenzyme Q10A
ILMN_28733	0.297791	0.0231	-2.75712	-3.38113	-0.674858	DEFB106A	defensin beta 106A
ILMN_12330	0.297791	0.0231	2.75694	-3.3814	0.536035	MDC1	mediator of DNA damage checkpoint 1
ILMN_29571	0.297791	0.0231	-2.75659	-3.38194	-0.664694	TTC16	tetratricopeptide repeat domain 16
ILMN_1042	0.297882	0.0232	-2.75542	-3.38372	-0.473297	MXI1	MAX interactor 1, dimerization protein
ILMN_14099	0.297882	0.0232	2.7553	-3.3839	0.531579	TMPO	thymopoietin
ILMN_20719	0.297882	0.0232	2.75494	-3.38445	0.696373	AGR3	anterior gradient 3, protein disulphide isomerase family member
ILMN_13283	0.297882	0.0232	-2.75484	-3.38462	-0.47699	HNMT	histamine N-methyltransferase
ILMN_28886	0.298157	0.0232	2.75387	-3.3861	0.507665	SPRYD4	SPRY domain containing 4
ILMN_25705	0.298223	0.0233	2.75335	-3.3869	0.495818	EIF1AD	eukaryotic translation initiation factor 1A domain containing
ILMN_3894	0.298487	0.0234	-2.75083	-3.39076	-1.43557	DEFB1	defensin beta 1
ILMN_22932	0.298487	0.0234	-2.75077	-3.39085	-0.554497	TMEM123	transmembrane protein 123
ILMN_20368	0.298487	0.0234	-2.75043	-3.39137	-0.499893	PKD2	polycystin 2, transient receptor potential cation channel
ILMN_25213	0.298487	0.0234	2.75012	-3.39184	0.450347	PTPN6	protein tyrosine phosphatase, non-receptor type 6
ILMN_20464	0.298487	0.0234	2.75008	-3.39191	0.505841	HSPA13	heat shock protein family A (Hsp70) member 13
ILMN_138225	0.298487	0.0234	2.74977	-3.39238	0.494736	PHEX	phosphate regulating endopeptidase homolog, X-linked
ILMN_19035	0.298487	0.0234	2.74938	-3.39297	0.696389	TMC6	transmembrane channel like 6
ILMN_6676	0.298487	0.0234	-2.74937	-3.393	-0.578047	SRCIN1	SRC kinase signaling inhibitor 1
ILMN_19354	0.298487	0.0234	2.74926	-3.39316	0.958823	FAM72D	family with sequence similarity 72 member D
ILMN_29522	0.298487	0.0234	-2.74892	-3.39368	-0.879847	ACAT1	acetyl-CoA acetyltransferase 1
ILMN_7285	0.299211	0.0235	-2.74702	-3.39659	-0.601476	ZNF396	zinc finger protein 396
ILMN_15043	0.299508	0.0235	2.74569	-3.39863	0.591081	FLVCR2	feline leukemia virus subgroup C cellular receptor family member 2
ILMN_11291	0.299508	0.0236	-2.74557	-3.39881	-0.436969	HAVCR1	hepatitis A virus cellular receptor 1
ILMN_18567	0.299508	0.0236	-2.74525	-3.39931	-0.49815	FYCO1	FYVE and coiled-coil domain containing 1
ILMN_17231	0.299938	0.0236	-2.74341	-3.40213	-0.687818	ZNF395	zinc finger protein 395
ILMN_17006	0.299938	0.0236	-2.74337	-3.40218	-0.444208	PKIG	protein kinase (cAMP-dependent, catalytic) inhibitor gamma
ILMN_6662	0.299938	0.0236	-2.7432	-3.40245	-1.05045	TRIM50	tripartite motif containing 50
ILMN_4643	0.300268	0.0237	2.74193	-3.40438	0.714577	IFI35	interferon induced protein 35
ILMN_17911	0.300268	0.0237	2.74174	-3.40467	0.69942
ILMN_23621	0.300528	0.0237	-2.74082	-3.40609	-0.464431	MSRA	methionine sulfoxide reductase A
ILMN_3641	0.300568	0.0238	2.74035	-3.4068	0.509692	PUS10	pseudouridylate synthase 10
ILMN_26237	0.301037	0.0238	2.73892	-3.409	0.524685	TUBA1B	tubulin alpha 1b
ILMN_15337	0.301037	0.0238	2.73861	-3.40947	0.434847	ARHGAP11A	Rho GTPase activating protein 11A
ILMN_22811	0.30137	0.0239	-2.73754	-3.41111	-0.475335	LIX1	limb and CNS expressed 1
ILMN_11218	0.301494	0.0239	-2.73656	-3.41262	-1.22662	ABCA2	ATP binding cassette subfamily A member 2
ILMN_136949	0.301494	0.0239	2.73652	-3.41267	0.826339
ILMN_24816	0.301565	0.0239	-2.73526	-3.4146	-0.490243	BTD	biotinidase
ILMN_10343	0.301565	0.024	-2.73505	-3.41492	-0.652265	CCRL2	C-C motif chemokine receptor like 2
ILMN_27447	0.301565	0.024	-2.7343	-3.41607	-0.509874	C11orf68	chromosome 11 open reading frame 68
ILMN_3545	0.301565	0.024	-2.73405	-3.41646	-0.636002	KLRC1	killer cell lectin like receptor C1
ILMN_13277	0.301565	0.024	2.73388	-3.41672	0.575918	SH3GL1	SH3 domain containing GRB2 like 1, endophilin A2
ILMN_19427	0.301565	0.024	-2.73367	-3.41704	-0.419859	HIVEP3	human immunodeficiency virus type I enhancer binding protein 3
ILMN_16812	0.301565	0.024	-2.7334	-3.41745	-0.809115	ALAD	aminolevulinate dehydratase
ILMN_9540	0.301565	0.024	-2.73305	-3.41799	-0.499047	SSTR2	somatostatin receptor 2
ILMN_27785	0.301565	0.0241	-2.73253	-3.41878	-0.499859	KCNQ5	potassium voltage-gated channel subfamily Q member 5
ILMN_18957	0.301565	0.0241	2.73246	-3.41889	0.593363	B3GNT5	UDP-GlcNAc:betaGal beta-1,3-N-acetylglucosaminyltransferase 5
ILMN_19619	0.301565	0.0241	2.73218	-3.41932	0.949943	GSDMB	gasdermin B
ILMN_27579	0.301627	0.0241	-2.73144	-3.42045	-0.624358	TEX2	testis expressed 2
ILMN_25059	0.301627	0.0241	2.73129	-3.42068	0.950313	HMOX1	heme oxygenase 1
ILMN_24722	0.302757	0.0242	-2.72858	-3.42483	-0.674986	DNASE1L2	deoxyribonuclease 1 like 2
ILMN_16576	0.303771	0.0243	-2.72595	-3.42886	-0.487832	DIP2C	disco interacting protein 2 homolog C
ILMN_20268	0.303771	0.0243	-2.72574	-3.42918	-0.459175	MAGEL2	MAGE family member L2
ILMN_13531	0.304593	0.0244	2.72355	-3.43253	0.589151	MCMBP	minichromosome maintenance complex binding protein
ILMN_11988	0.304593	0.0244	2.72325	-3.43299	0.719809	FABP1	fatty acid binding protein 1
ILMN_6399	0.304593	0.0244	2.72284	-3.43362	0.604292	TAF5L	TATA-box binding protein associated factor 5 like
ILMN_23858	0.304593	0.0245	-2.72198	-3.43494	-0.452247	ADGRG1	adhesion G protein-coupled receptor G1
ILMN_26132	0.304593	0.0245	-2.72182	-3.43519	-0.432918	SIGLEC15	sialic acid binding Ig like lectin 15
ILMN_27466	0.304593	0.0245	2.72143	-3.43578	0.740636	STARD4	StAR related lipid transfer domain containing 4
ILMN_12851	0.304593	0.0245	-2.72141	-3.43581	-0.641573	ZNF572	zinc finger protein 572
ILMN_17170	0.305894	0.0246	2.71775	-3.44142	0.735311	ACOT11	acyl-CoA thioesterase 11
ILMN_12889	0.305894	0.0246	-2.71771	-3.44148	-0.993854	PTMS	parathymosin
ILMN_137891	0.305894	0.0246	-2.71763	-3.4416	-0.626969	MSX1	msh homeobox 1
ILMN_11251	0.306059	0.0247	-2.71691	-3.4427	-1.58936	PTGER3	prostaglandin E receptor 3
ILMN_2619	0.306358	0.0247	2.71593	-3.4442	0.534573
ILMN_14060	0.306408	0.0247	-2.71514	-3.44541	-0.713412	HLF	HLF, PAR bZIP transcription factor
ILMN_28528	0.306408	0.0247	-2.71497	-3.44567	-0.516603	PLAG1	PLAG1 zinc finger
ILMN_3463	0.306408	0.0247	-2.7147	-3.44609	-0.65442	SEMA3G	semaphorin 3G
ILMN_2123	0.30682	0.0248	2.71306	-3.4486	0.492239	RCC2	regulator of chromosome condensation 2
ILMN_17163	0.30682	0.0248	2.71253	-3.44941	0.543654	ING1	inhibitor of growth family member 1
ILMN_18920	0.30682	0.0248	-2.71236	-3.44968	-0.553116	CCNY	cyclin Y
ILMN_22572	0.30682	0.0249	-2.71178	-3.45056	-0.588828	CAPNS2	calpain small subunit 2
ILMN_22390	0.30682	0.0249	-2.71128	-3.45132	-0.906582	VAV3	vav guanine nucleotide exchange factor 3
ILMN_7438	0.30682	0.0249	2.71086	-3.45197	1.0982	SLC27A2	solute carrier family 27 member 2
ILMN_763	0.30682	0.0249	2.71054	-3.45245	1.62028	IL1RL1	interleukin 1 receptor like 1
ILMN_17981	0.30682	0.0249	-2.71041	-3.45265	-1.12545	NR1D2	nuclear receptor subfamily 1 group D member 2
ILMN_15827	0.30682	0.0249	2.7101	-3.45313	0.791312	OR8G1	olfactory receptor family 8 subfamily G member 1 (gene/pseudogene)
ILMN_11402	0.30682	0.0249	-2.70988	-3.45346	-0.538596	STAR	steroidogenic acute regulatory protein
ILMN_14552	0.30682	0.0249	2.70975	-3.45366	0.469671	PTPN18	protein tyrosine phosphatase, non-receptor type 18
ILMN_2708	0.307098	0.025	-2.70882	-3.45509	-0.432256	NTNG1	netrin G1
ILMN_20892	0.307112	0.025	2.70842	-3.45571	0.770634	RHBDF1	rhomboid 5 homolog 1
ILMN_22818	0.307254	0.025	-2.70719	-3.45758	-0.718313	GCHFR	GTP cyclohydrolase I feedback regulator
ILMN_10585	0.307254	0.0251	2.70691	-3.45801	0.662338	KRT2	keratin 2
ILMN_23388	0.307254	0.0251	2.70664	-3.45842	0.736145	TUBB4A	tubulin beta 4A class IVa
ILMN_14697	0.307254	0.0251	2.70643	-3.45875	0.626836	BACE2	beta-site APP-cleaving enzyme 2
ILMN_1537	0.307254	0.0251	-2.70602	-3.45938	-0.471873	UQCR10	ubiquinol-cytochrome c reductase, complex III subunit X
ILMN_12016	0.307254	0.0251	-2.70582	-3.45968	-0.439366	HMG20A	high mobility group 20A
ILMN_14177	0.307254	0.0251	-2.70526	-3.46053	-0.988638	SOWAHA	sosondowah ankyrin repeat domain family member A
ILMN_22043	0.307254	0.0251	-2.70516	-3.46069	-1.25995	RAB26	RAB26, member RAS oncogene family
ILMN_4507	0.307295	0.0251	-2.70471	-3.46139	-0.637122	OR7G2	olfactory receptor family 7 subfamily G member 2
ILMN_12853	0.307442	0.0252	-2.70387	-3.46268	-0.666618	SYT14	synaptotagmin 14
ILMN_24062	0.307442	0.0252	-2.70337	-3.46343	-0.461454	CLK4	CDC like kinase 4
ILMN_14892	0.307442	0.0252	2.7033	-3.46354	0.541212	RCC1	regulator of chromosome condensation 1
ILMN_2688	0.307647	0.0252	2.70246	-3.46483	1.0874	GDF15	growth differentiation factor 15
ILMN_17879	0.307647	0.0253	-2.70119	-3.46678	-0.545885	ZBED5	zinc finger BED-type containing 5
ILMN_20318	0.307647	0.0253	2.70073	-3.46748	0.511061	MAP3K6	mitogen-activated protein kinase kinase kinase 6
ILMN_8720	0.307647	0.0253	-2.7004	-3.46799	-0.868348	CEP68	centrosomal protein 68
ILMN_27063	0.307647	0.0253	2.70022	-3.46826	0.547483	FLCN	folliculin
ILMN_6975	0.307647	0.0253	-2.70013	-3.4684	-0.432564	PIWIL1	piwi like RNA-mediated gene silencing 1
ILMN_20405	0.307647	0.0254	2.69957	-3.46926	0.510612	GPR142	G protein-coupled receptor 142
ILMN_3534	0.307647	0.0254	-2.69943	-3.46947	-0.535564	ASIC1	acid sensing ion channel subunit 1
ILMN_22269	0.307647	0.0254	2.69921	-3.4698	0.52783	FAM188B	family with sequence similarity 188 member B
ILMN_24070	0.307647	0.0254	2.69921	-3.46981	0.781516	LIN7A	lin-7 homolog A, crumbs cell polarity complex component
ILMN_18542	0.308106	0.0254	-2.69791	-3.4718	-0.534523	ACP1	acid phosphatase 1, soluble
ILMN_3422	0.308229	0.0255	2.69727	-3.47277	0.493569	LCE3B	late cornified envelope 3B
ILMN_25394	0.308229	0.0255	-2.69688	-3.47337	-0.509438	CCDC53	coiled-coil domain containing 53
ILMN_14593	0.308229	0.0255	2.69543	-3.47559	0.596493	LEO1	LEO1 homolog, Paf1/RNA polymerase II complex component
ILMN_8709	0.308229	0.0255	2.6949	-3.47641	0.699895	GOLM1	golgi membrane protein 1
ILMN_4207	0.308229	0.0256	2.69439	-3.47718	0.681051	MMD	monocyte to macrophage differentiation associated
ILMN_16211	0.308229	0.0256	-2.69429	-3.47734	-0.490299	BLCAP	bladder cancer associated protein
ILMN_11051	0.308229	0.0256	2.69425	-3.4774	0.501308	AHSA1	activator of Hsp90 ATPase activity 1
ILMN_4562	0.308229	0.0256	-2.69399	-3.47779	-0.498749	TBC1D21	TBC1 domain family member 21
ILMN_10872	0.308229	0.0256	2.69368	-3.47826	0.648238	BLM	Bloom syndrome RecQ like helicase
ILMN_14524	0.308229	0.0256	-2.69364	-3.47833	-0.593922	FAM83A	family with sequence similarity 83 member A
ILMN_4519	0.308229	0.0256	-2.69337	-3.47875	-0.629637	ZNF33A	zinc finger protein 33A
ILMN_18912	0.308229	0.0256	-2.69328	-3.47889	-0.8452	NEDD4L	neural precursor cell expressed, developmentally down-regulated 4-like, E3 ubiquitin protein ligase
ILMN_15353	0.308713	0.0257	-2.6916	-3.48146	-0.551817	TOMM20L	translocase of outer mitochondrial membrane 20 like
ILMN_2647	0.308713	0.0257	2.69129	-3.48193	0.418655	DCLRE1B	DNA cross-link repair 1B
ILMN_12220	0.308713	0.0257	-2.69086	-3.48259	-0.540467	PUM2	pumilio RNA binding family member 2
ILMN_25901	0.308713	0.0257	2.69078	-3.4827	0.640582	EPHX3	epoxide hydrolase 3
ILMN_999	0.308713	0.0257	2.69038	-3.48332	0.4284	PPIH	peptidylprolyl isomerase H
ILMN_17971	0.308713	0.0257	-2.69012	-3.48373	-0.746653	ZNF441	zinc finger protein 441
ILMN_13428	0.309372	0.0258	-2.68843	-3.48632	-0.587467	PMP2	peripheral myelin protein 2
ILMN_8647	0.309412	0.0259	-2.68742	-3.48785	-0.63864	FAM129A	family with sequence similarity 129 member A
ILMN_5971	0.309412	0.0259	-2.68678	-3.48883	-0.493398
ILMN_7417	0.309412	0.0259	-2.68669	-3.48898	-0.574869	ACADSB	acyl-CoA dehydrogenase, short/branched chain
ILMN_3197	0.309412	0.0259	-2.68538	-3.49098	-0.417827	SLC39A6	solute carrier family 39 member 6
ILMN_28848	0.309412	0.026	-2.68495	-3.49164	-0.815188
ILMN_5022	0.309412	0.026	2.6849	-3.49171	0.478288	SMG9	SMG9, nonsense mediated mRNA decay factor
ILMN_19245	0.309412	0.026	-2.68482	-3.49183	-0.847062	TSPAN6	tetraspanin 6
ILMN_139372	0.309412	0.026	2.68461	-3.49215	0.687777	RPL36	ribosomal protein L36
ILMN_1769	0.309412	0.026	-2.68383	-3.49335	-0.604541	GHDC	GH3 domain containing
ILMN_20795	0.309412	0.026	2.68378	-3.49342	0.478624	C4orf46	chromosome 4 open reading frame 46
ILMN_3852	0.309412	0.026	-2.68372	-3.49351	-0.625664	PLGLB2	plasminogen-like B2
ILMN_19134	0.309412	0.026	-2.68367	-3.4936	-0.772647	PAQR5	progestin and adipoQ receptor family member 5
ILMN_10840	0.309412	0.026	2.68289	-3.49479	0.493485	KIF4A	kinesin family member 4A
ILMN_2348	0.309412	0.0261	-2.68275	-3.495	-0.434853	DHX32	DEAH-box helicase 32 (putative)
ILMN_25112	0.309412	0.0261	-2.68234	-3.49563	-0.601106	MCCD1	mitochondrial coiled-coil domain 1
ILMN_139166	0.309412	0.0261	2.682	-3.49615	0.794236	RPL27A	ribosomal protein L27a
ILMN_26723	0.309412	0.0261	2.6814	-3.49708	0.488703	APOC2	apolipoprotein C2
ILMN_2093	0.309412	0.0261	-2.68124	-3.49732	-0.449006	ARPP19	cAMP regulated phosphoprotein 19
ILMN_4676	0.309412	0.0261	-2.68121	-3.49736	-1.15146	KCNK2	potassium two pore domain channel subfamily K member 2
ILMN_5745	0.309412	0.0261	2.68053	-3.4984	0.465059	MIS18BP1	MIS18 binding protein 1
ILMN_1146	0.309412	0.0261	2.68052	-3.49842	0.511836
ILMN_15012	0.309412	0.0262	-2.68033	-3.49872	-0.70873	FAIM	Fas apoptotic inhibitory molecule
ILMN_18199	0.309412	0.0262	-2.68006	-3.49912	-0.628243	DIRAS1	DIRAS family GTPase 1
ILMN_430	0.309611	0.0262	-2.6793	-3.50028	-1.30356	GUCA1C	guanylate cyclase activator 1C
ILMN_7040	0.309957	0.0262	-2.67825	-3.50189	-0.783286	SEC62	SEC62 homolog, preprotein translocation factor
ILMN_29055	0.310009	0.0263	-2.67725	-3.50342	-0.487843
ILMN_14658	0.310009	0.0263	2.67718	-3.50354	0.65399	RBBP4	RB binding protein 4, chromatin remodeling factor
ILMN_1163	0.310009	0.0263	-2.67707	-3.50369	-0.662705	DSCAM	DS cell adhesion molecule
ILMN_26701	0.310046	0.0263	-2.67611	-3.50517	-0.562997	MXD4	MAX dimerization protein 4
ILMN_22049	0.310046	0.0263	-2.67596	-3.50539	-0.505953	KAT6B	lysine acetyltransferase 6B
ILMN_22410	0.310046	0.0263	2.67571	-3.50578	0.592536	GLA	galactosidase alpha
ILMN_1609	0.310046	0.0264	-2.67558	-3.50599	-0.672329	RILPL1	Rab interacting lysosomal protein like 1
ILMN_29075	0.310117	0.0264	-2.67508	-3.50675	-0.547219	TRPC5	transient receptor potential cation channel subfamily C member 5
ILMN_14455	0.31074	0.0264	-2.6734	-3.50932	-0.467299	PAIP2	poly(A) binding protein interacting protein 2
ILMN_28155	0.31074	0.0265	-2.67287	-3.51012	-0.567557	XPA	XPA, DNA damage recognition and repair factor
ILMN_5010	0.31074	0.0265	-2.67259	-3.51056	-1.05076	ADHFE1	alcohol dehydrogenase, iron containing 1
ILMN_7507	0.31074	0.0265	-2.67224	-3.5111	-0.483156	BDNF	brain derived neurotrophic factor
ILMN_10492	0.31074	0.0265	-2.6718	-3.51176	-0.661865	EPHA7	EPH receptor A7
ILMN_16859	0.31074	0.0265	2.67168	-3.51194	0.523733	CHORDC1	cysteine and histidine rich domain containing 1
ILMN_4209	0.31074	0.0265	-2.67134	-3.51247	-0.520747	BRSK1	BR serine/threonine kinase 1
ILMN_10965	0.310987	0.0266	2.67049	-3.51376	0.493305	RARRES1	retinoic acid receptor responder 1
ILMN_4363	0.311501	0.0266	2.6688	-3.51636	0.436658	MRRF	mitochondrial ribosome recycling factor
ILMN_16239	0.311501	0.0267	-2.66857	-3.51671	-0.493401	SOCS5	suppressor of cytokine signaling 5
ILMN_9711	0.311501	0.0267	-2.66841	-3.51696	-0.584519
ILMN_6860	0.311533	0.0267	2.66799	-3.5176	0.716837	CARD17	caspase recruitment domain family member 17
ILMN_26472	0.311634	0.0267	2.66736	-3.51857	0.454441	SOST	sclerostin
ILMN_10164	0.311634	0.0267	-2.66669	-3.51959	-0.626333	BRD8	bromodomain containing 8
ILMN_24373	0.311634	0.0267	2.66652	-3.51984	0.467273	DMXL2	Dmx like 2
ILMN_30123	0.311634	0.0268	2.66621	-3.52032	0.480684	RPN2	ribophorin II
ILMN_19614	0.311634	0.0268	2.66602	-3.52061	0.462643	MCM3AP	minichromosome maintenance complex component 3 associated protein
ILMN_6283	0.311661	0.0268	2.66562	-3.52123	0.45303	FLVCR1	feline leukemia virus subgroup C cellular receptor 1
ILMN_7839	0.312578	0.0269	-2.66344	-3.52457	-0.604213	LDLRAD4	low density lipoprotein receptor class A domain containing 4
ILMN_15664	0.312589	0.0269	-2.66306	-3.52514	-0.499888	CST3	cystatin C
ILMN_15235	0.313007	0.0269	-2.66188	-3.52695	-0.437529	C2orf27A	chromosome 2 open reading frame 27A
ILMN_21555	0.313096	0.027	2.66062	-3.52888	0.666799	CARD16	caspase recruitment domain family member 16
ILMN_24249	0.313096	0.027	-2.66053	-3.52901	-0.516886	IFT22	intraflagellar transport 22
ILMN_30223	0.313096	0.027	-2.65943	-3.5307	-0.493593	SPPL3	signal peptide peptidase like 3
ILMN_21799	0.313096	0.0271	2.65889	-3.53152	0.576458	CD1A	CD1a molecule
ILMN_9741	0.313096	0.0271	-2.65879	-3.53168	-0.607152
ILMN_17656	0.313096	0.0271	2.65867	-3.53186	0.607623	PLEKHA7	pleckstrin homology domain containing A7
ILMN_9632	0.313096	0.0271	-2.65855	-3.53204	-0.805937	GGT6	gamma-glutamyltransferase 6
ILMN_21198	0.313096	0.0271	-2.65855	-3.53204	-0.548566	CLN8	ceroid-lipofuscinosis, neuronal 8
ILMN_4958	0.313096	0.0271	2.65827	-3.53247	0.520895	ERO1A	endoplasmic reticulum oxidoreductase 1 alpha
ILMN_7756	0.313096	0.0271	2.65795	-3.53296	0.599297	SRGAP1	SLIT-ROBO Rho GTPase activating protein 1
ILMN_1399	0.313096	0.0271	-2.65769	-3.53336	-0.511311	MMP20	matrix metallopeptidase 20
ILMN_22473	0.313096	0.0271	-2.6575	-3.53365	-0.668464	ATPAF1	ATP synthase mitochondrial F1 complex assembly factor 1
ILMN_29178	0.313747	0.0272	2.65586	-3.53616	0.488559	SERPINB6	serpin family B member 6
ILMN_138576	0.313768	0.0272	-2.65547	-3.53676	-0.56393	CCSER2	coiled-coil serine rich protein 2
ILMN_23337	0.313777	0.0272	2.65498	-3.5375	0.520038	GPR26	G protein-coupled receptor 26
ILMN_20559	0.313777	0.0273	2.65449	-3.53826	0.486942	PLOD1	procollagen-lysine,2-oxoglutarate 5-dioxygenase 1
ILMN_26350	0.313777	0.0273	2.65411	-3.53884	0.603418	WISP1	WNT1 inducible signaling pathway protein 1
ILMN_26446	0.313777	0.0273	-2.65388	-3.53919	-0.433276	MBLAC2	metallo-beta-lactamase domain containing 2
ILMN_24111	0.313777	0.0273	2.65256	-3.54121	0.467614	NUP107	nucleoporin 107
ILMN_26781	0.313777	0.0274	-2.65155	-3.54275	-0.519791	IVNS1ABP	influenza virus NS1A binding protein
ILMN_2101	0.313777	0.0274	2.65152	-3.5428	0.527233	TCP10	t-complex 10
ILMN_13807	0.313777	0.0274	2.65096	-3.54366	1.18043	FAR2	fatty acyl-CoA reductase 2
ILMN_9171	0.313777	0.0274	-2.65054	-3.5443	-0.507525	BCL2L2	BCL2 like 2
ILMN_28241	0.313777	0.0274	2.65051	-3.54435	0.442386	SERPINH1	serpin family H member 1
ILMN_11854	0.313777	0.0275	-2.64992	-3.54526	-0.513048	IRX1	iroquois homeobox 1
ILMN_24738	0.313777	0.0275	2.64983	-3.54538	1.03695	FEN1	flap structure-specific endonuclease 1
ILMN_24639	0.313777	0.0275	2.64971	-3.54557	0.647865	ST7L	suppression of tumorigenicity 7 like
ILMN_5586	0.313777	0.0275	-2.64957	-3.54578	-0.592638	KITLG	KIT ligand
ILMN_18258	0.313777	0.0275	2.64943	-3.546	0.587602	TRRAP	transformation/transcription domain associated protein
ILMN_21041	0.313777	0.0275	-2.64913	-3.54646	-0.645269	SLC25A12	solute carrier family 25 member 12
ILMN_2014	0.313777	0.0275	-2.64908	-3.54654	-0.466612	DNAH11	dynein axonemal heavy chain 11
ILMN_553	0.313777	0.0275	-2.64899	-3.54668	-0.455402	GOLGA7	golgin A7
ILMN_5558	0.313777	0.0275	2.64869	-3.54714	0.499481	SLC24A4	solute carrier family 24 member 4
ILMN_29384	0.313777	0.0275	2.64852	-3.54739	0.547929	OR6Q1	olfactory receptor family 6 subfamily Q member 1 (gene/pseudogene)
ILMN_23612	0.314829	0.0276	-2.64583	-3.55151	-0.740917	TMEM116	transmembrane protein 116
ILMN_22610	0.314829	0.0276	-2.64575	-3.55163	-0.470391	TRIM8	tripartite motif containing 8
ILMN_22430	0.315282	0.0277	2.64451	-3.55353	0.554179	NLGN2	neuroligin 2
ILMN_13195	0.31533	0.0277	2.64383	-3.55456	0.686252	SLC6A9	solute carrier family 6 member 9
ILMN_5994	0.31533	0.0277	2.64373	-3.55472	0.756002	OAS2	2'-5'-oligoadenylate synthetase 2
ILMN_21965	0.31561	0.0278	-2.64252	-3.55657	-0.561346
ILMN_406	0.31561	0.0278	-2.64249	-3.55662	-0.470724	PANK1	pantothenate kinase 1
ILMN_24952	0.315636	0.0278	-2.64139	-3.5583	-0.650664	DHCR24	24-dehydrocholesterol reductase
ILMN_5202	0.315636	0.0278	2.64125	-3.55851	0.675751	PDLIM7	PDZ and LIM domain 7
ILMN_12398	0.315636	0.0279	2.641	-3.55889	0.543863	ENOSF1	enolase superfamily member 1
ILMN_5108	0.315636	0.0279	-2.64074	-3.5593	-0.453476	CAV2	caveolin 2
ILMN_22246	0.315636	0.0279	-2.64072	-3.55932	-0.418274	DNAL4	dynein axonemal light chain 4
ILMN_17135	0.316362	0.0279	-2.63895	-3.56203	-0.500665	FCGRT	Fc fragment of IgG receptor and transporter
ILMN_1993	0.316414	0.028	2.63851	-3.56271	0.416083	SAE1	SUMO1 activating enzyme subunit 1
ILMN_10634	0.316543	0.028	2.63759	-3.56411	0.502835	STAT6	signal transducer and activator of transcription 6
ILMN_20348	0.316543	0.028	-2.63757	-3.56414	-0.437775	NDUFB2	NADH:ubiquinone oxidoreductase subunit B2
ILMN_26566	0.316962	0.0281	2.63641	-3.56592	0.725808	MAP3K13	mitogen-activated protein kinase kinase kinase 13
ILMN_14769	0.317079	0.0281	2.63517	-3.56782	0.499748	HDHD3	haloacid dehalogenase like hydrolase domain containing 3
ILMN_10074	0.317079	0.0281	2.63455	-3.56876	0.606312
ILMN_30213	0.317079	0.0281	-2.63453	-3.56879	-0.470944	XAB2	XPA binding protein 2
ILMN_15231	0.317079	0.0282	2.63444	-3.56892	1.00657	HCP5	HLA complex P5 (non-protein coding)
ILMN_18302	0.317079	0.0282	-2.63407	-3.5695	-2.08531
ILMN_18020	0.317079	0.0282	2.63307	-3.57103	0.762724	GPR52	G protein-coupled receptor 52
ILMN_28543	0.317079	0.0282	2.63262	-3.57172	0.683992	LRRC15	leucine rich repeat containing 15
ILMN_29130	0.317079	0.0282	-2.63247	-3.57194	-0.44159	VCPKMT	valosin containing protein lysine methyltransferase
ILMN_28425	0.317079	0.0282	-2.63239	-3.57206	-0.54001	MTX3	metaxin 3
ILMN_1535	0.317079	0.0282	-2.63232	-3.57217	-0.548072	JADE1	jade family PHD finger 1
ILMN_14357	0.317079	0.0283	2.63226	-3.57227	1.4543	CARD11	caspase recruitment domain family member 11
ILMN_21925	0.317079	0.0283	-2.63172	-3.57309	-0.539245	ST6GALNAC6	ST6 N-acetylgalactosaminide alpha-2,6-sialyltransferase 6
ILMN_16434	0.317079	0.0283	2.63135	-3.57366	1.21805	CCL13	C-C motif chemokine ligand 13
ILMN_22183	0.317079	0.0283	-2.63113	-3.57399	-1.35226	APLP1	amyloid beta precursor like protein 1
ILMN_19002	0.317079	0.0283	-2.63108	-3.57407	-0.760154	DPYD	dihydropyrimidine dehydrogenase
ILMN_2349	0.317652	0.0284	-2.62892	-3.57737	-0.779602	DOCK2	dedicator of cytokinesis 2
ILMN_13522	0.317652	0.0284	2.62851	-3.57801	0.63875	NELFE	negative elongation factor complex member E
ILMN_27277	0.317652	0.0284	2.62833	-3.57827	0.708367	IL1B	interleukin 1 beta
ILMN_17794	0.317652	0.0284	2.62827	-3.57837	0.642955	UGGT1	UDP-glucose glycoprotein glucosyltransferase 1
ILMN_16920	0.317652	0.0285	2.62753	-3.57949	0.578162	PVALB	parvalbumin
ILMN_4220	0.317652	0.0285	2.62704	-3.58025	0.467753	H2AFZ	H2A histone family member Z
ILMN_14598	0.317652	0.0285	2.62703	-3.58026	0.427031	TGM7	transglutaminase 7
ILMN_25725	0.317652	0.0285	-2.62643	-3.58118	-0.704313	CCDC112	coiled-coil domain containing 112
ILMN_25860	0.317652	0.0285	2.62633	-3.58133	0.648355	PAQR8	progestin and adipoQ receptor family member 8
ILMN_9105	0.317652	0.0285	2.6261	-3.58168	0.433889	RPP25L	ribonuclease P/MRP subunit p25 like
ILMN_13910	0.317652	0.0286	-2.6257	-3.5823	-0.543547	AMBP	alpha-1-microglobulin/bikunin precursor
ILMN_20005	0.317652	0.0286	-2.62531	-3.58289	-0.571896	ISCA1	iron-sulfur cluster assembly 1
ILMN_30363	0.317652	0.0286	-2.62524	-3.583	-0.612178	ALDH4A1	aldehyde dehydrogenase 4 family member A1
ILMN_28286	0.317652	0.0286	-2.62507	-3.58327	-0.832424	ZG16	zymogen granule protein 16
ILMN_5164	0.317652	0.0286	-2.62465	-3.58391	-0.513757	MIB1	mindbomb E3 ubiquitin protein ligase 1
ILMN_9069	0.317652	0.0286	-2.62456	-3.58404	-0.463879	GRK7	G protein-coupled receptor kinase 7
ILMN_12453	0.317673	0.0286	-2.62408	-3.58478	-0.460246	MAP2K5	mitogen-activated protein kinase kinase 5
ILMN_4440	0.317673	0.0286	2.62366	-3.58543	0.58896	IKBKE	inhibitor of kappa light polypeptide gene enhancer in B-cells, kinase epsilon
ILMN_26003	0.317673	0.0287	-2.62352	-3.58564	-1.11713	NUPR1	nuclear protein 1, transcriptional regulator
ILMN_137072	0.317882	0.0287	2.62264	-3.58698	0.422372	UBFD1	ubiquitin family domain containing 1
ILMN_1847	0.317882	0.0287	2.6224	-3.58734	0.470404	TMTC3	transmembrane and tetratricopeptide repeat containing 3
ILMN_29963	0.317882	0.0288	-2.6205	-3.59025	-0.475874	TSPYL1	TSPY like 1
ILMN_7767	0.317882	0.0288	2.62049	-3.59027	0.877434	ENTPD1	ectonucleoside triphosphate diphosphohydrolase 1
ILMN_1656	0.317882	0.0288	2.62031	-3.59054	0.441137	NUDT5	nudix hydrolase 5
ILMN_22691	0.317882	0.0288	2.62022	-3.59068	0.55469	NOMO1	NODAL modulator 1
ILMN_8818	0.317882	0.0288	2.62008	-3.59089	0.670828	INHBC	inhibin beta C subunit
ILMN_10541	0.317882	0.0288	2.61981	-3.5913	0.411403
ILMN_5700	0.317882	0.0288	2.61981	-3.59131	0.894514	CCL17	C-C motif chemokine ligand 17
ILMN_16168	0.317882	0.0288	2.61977	-3.59137	0.450156	C9orf64	chromosome 9 open reading frame 64
ILMN_137926	0.318031	0.0289	-2.61914	-3.59233	-0.601575	SEC14L1	SEC14 like lipid binding 1
ILMN_28005	0.318319	0.0289	-2.6179	-3.59423	-0.459986	UXS1	UDP-glucuronate decarboxylase 1
ILMN_11514	0.318319	0.0289	-2.61781	-3.59437	-1.18528	FXYD4	FXYD domain containing ion transport regulator 4
ILMN_30324	0.318319	0.0289	-2.61725	-3.59522	-0.507994	NOB1	NIN1/PSMD8 binding protein 1 homolog
ILMN_17570	0.318319	0.029	-2.61699	-3.59562	-0.513075	TFPI2	tissue factor pathway inhibitor 2
ILMN_6684	0.318319	0.029	-2.61692	-3.59573	-0.473579	LMBRD1	LMBR1 domain containing 1
ILMN_15630	0.318333	0.029	-2.61641	-3.5965	-0.440651	SATB2	SATB homeobox 2
ILMN_28911	0.318333	0.029	-2.61623	-3.59679	-0.449627	TEKT1	tektin 1
ILMN_20123	0.319205	0.0291	-2.61358	-3.60084	-0.418822	RS1	retinoschisin 1
ILMN_10771	0.319205	0.0291	-2.61354	-3.60089	-0.476244	UBXN6	UBX domain protein 6
ILMN_6400	0.319205	0.0291	2.61349	-3.60096	0.406101	GPSM2	G-protein signaling modulator 2
ILMN_137905	0.319205	0.0291	-2.61302	-3.60169	-0.61333	GPX3	glutathione peroxidase 3
ILMN_10963	0.319205	0.0291	-2.61287	-3.60192	-0.471283	SRI	sorcin
ILMN_3631	0.319301	0.0292	2.61235	-3.60271	0.649384	RNASE11	ribonuclease A family member 11 (inactive)
ILMN_18729	0.3194	0.0292	-2.61138	-3.6042	-0.636327	ANKRD9	ankyrin repeat domain 9
ILMN_7563	0.3194	0.0292	-2.61101	-3.60476	-0.525915	TUBE1	tubulin epsilon 1
ILMN_25195	0.3194	0.0292	2.6108	-3.60508	0.734298	LY96	lymphocyte antigen 96
ILMN_10495	0.3194	0.0293	2.61055	-3.60546	0.471671	SNRPA	small nuclear ribonucleoprotein polypeptide A
ILMN_4334	0.3194	0.0293	2.61051	-3.60553	0.514394	CD300LF	CD300 molecule like family member f
ILMN_11753	0.319547	0.0293	2.60869	-3.60831	0.46565	NUP205	nucleoporin 205
ILMN_12236	0.319547	0.0293	-2.60862	-3.60841	-0.441974	ZBTB21	zinc finger and BTB domain containing 21
ILMN_24828	0.319547	0.0294	2.60851	-3.60859	0.926982	COL9A2	collagen type IX alpha 2 chain
ILMN_7748	0.319547	0.0294	2.60804	-3.6093	0.495367	IGFL4	IGF like family member 4
ILMN_11167	0.319547	0.0294	2.60799	-3.60937	0.473285	SEC24C	SEC24 homolog C, COPII coat complex component
ILMN_6384	0.319547	0.0294	2.60783	-3.60963	0.535739	ADGRG7	adhesion G protein-coupled receptor G7
ILMN_22566	0.319547	0.0294	2.6075	-3.61012	0.473259	C5orf34	chromosome 5 open reading frame 34
ILMN_665	0.319547	0.0294	-2.60746	-3.61018	-0.519351	WBP4	WW domain binding protein 4
ILMN_10966	0.319547	0.0294	-2.60726	-3.61049	-0.456926	PEX19	peroxisomal biogenesis factor 19
ILMN_22700	0.320101	0.0295	-2.60586	-3.61264	-0.455412
ILMN_30287	0.320232	0.0295	-2.60505	-3.61387	-0.461613	PEX2	peroxisomal biogenesis factor 2
ILMN_13270	0.320232	0.0295	-2.60466	-3.61446	-0.681832	BCKDHA	branched chain keto acid dehydrogenase E1, alpha polypeptide
ILMN_8873	0.320232	0.0295	2.60462	-3.61453	0.512875	RBMY1B	RNA binding motif protein, Y-linked, family 1, member B
ILMN_15177	0.320242	0.0296	-2.60427	-3.61506	-0.53421	SLC6A2	solute carrier family 6 member 2
ILMN_9801	0.320319	0.0296	-2.6038	-3.61579	-0.462258	SH3BGRL2	SH3 domain binding glutamate rich protein like 2
ILMN_15791	0.320744	0.0296	2.60264	-3.61755	0.813299	MCM6	minichromosome maintenance complex component 6
ILMN_4954	0.320837	0.0297	2.60156	-3.6192	0.448592	RHNO1	RAD9-HUS1-RAD1 interacting nuclear orphan 1
ILMN_24126	0.320837	0.0297	-2.60104	-3.62	-0.968682	SORBS2	sorbin and SH3 domain containing 2
ILMN_7746	0.320837	0.0297	-2.60096	-3.62013	-0.498564	JUN	Jun proto-oncogene, AP-1 transcription factor subunit
ILMN_25239	0.320837	0.0297	2.60084	-3.6203	0.8184	GLIS3	GLIS family zinc finger 3
ILMN_138176	0.320837	0.0297	2.60083	-3.62032	0.867265	C1QA	complement C1q A chain
ILMN_24850	0.32086	0.0297	2.60046	-3.62089	0.625077	KIF6	kinesin family member 6
ILMN_24846	0.320878	0.0298	2.5998	-3.6219	0.708404	B3GNT6	UDP-GlcNAc:betaGal beta-1,3-N-acetylglucosaminyltransferase 6
ILMN_15009	0.320878	0.0298	-2.59977	-3.62194	-0.505206	ZFP2	ZFP2 zinc finger protein
ILMN_30090	0.321333	0.0298	2.59857	-3.62378	0.509889	SLC25A48	solute carrier family 25 member 48
ILMN_10704	0.321562	0.0299	-2.5978	-3.62496	-0.411134	PCNX2	pecanex homolog 2 (Drosophila)
ILMN_21617	0.32174	0.0299	2.59713	-3.62598	0.71409	ACKR4	atypical chemokine receptor 4
ILMN_14503	0.322437	0.03	-2.59546	-3.62853	-0.613749	IRS2	insulin receptor substrate 2
ILMN_13250	0.322751	0.03	-2.59453	-3.62995	-0.88041
ILMN_13159	0.323101	0.0301	-2.59353	-3.63148	-0.563409	RBPMS	RNA binding protein with multiple splicing
ILMN_15026	0.3232	0.0301	-2.59302	-3.63226	-0.769006	PIK3IP1	phosphoinositide-3-kinase interacting protein 1
ILMN_24789	0.32372	0.0302	2.59157	-3.63448	0.443898	ZNF780B	zinc finger protein 780B
ILMN_16943	0.32372	0.0302	-2.59137	-3.63478	-0.485729	ABCB8	ATP binding cassette subfamily B member 8
ILMN_9187	0.324416	0.0303	2.58971	-3.63731	0.532668	AP1B1	adaptor related protein complex 1 beta 1 subunit
ILMN_27397	0.324428	0.0303	-2.58874	-3.63879	-0.412265	MIR99AHG	mir-99a-let-7c cluster host gene
ILMN_139271	0.324428	0.0303	2.58867	-3.6389	0.824173	PPARD	peroxisome proliferator activated receptor delta
ILMN_29176	0.324428	0.0303	-2.5886	-3.63901	-0.58227	TMEM182	transmembrane protein 182
ILMN_30270	0.324428	0.0303	-2.58809	-3.63979	-0.461643
ILMN_25951	0.324428	0.0304	-2.58717	-3.6412	-0.465354	PPCS	phosphopantothenoylcysteine synthetase
ILMN_14916	0.324428	0.0304	2.58635	-3.64246	0.6666
ILMN_13777	0.324428	0.0304	2.58631	-3.64251	0.412254	NANS	N-acetylneuraminate synthase
ILMN_137405	0.324428	0.0304	2.58629	-3.64254	0.452258	GAPDH	glyceraldehyde-3-phosphate dehydrogenase
ILMN_5543	0.324428	0.0304	-2.58596	-3.64304	-1.25613	TPD52L1	tumor protein D52-like 1
ILMN_138077	0.324428	0.0305	2.58485	-3.64474	0.603002	POMC	proopiomelanocortin
ILMN_27352	0.324428	0.0305	-2.58468	-3.64501	-0.881945	CLIC6	chloride intracellular channel 6
ILMN_28455	0.324428	0.0305	-2.58431	-3.64557	-1.47981	KIAA0895	KIAA0895
ILMN_3912	0.324428	0.0305	-2.58417	-3.64578	-1.06194	NFATC2	nuclear factor of activated T-cells 2
ILMN_9021	0.324428	0.0305	2.58417	-3.64578	0.599586	KRTAP12-2	keratin associated protein 12-2
ILMN_25000	0.324428	0.0305	-2.58392	-3.64617	-0.493932	STX1B	syntaxin 1B
ILMN_25161	0.324428	0.0306	2.58341	-3.64694	0.474043	WDR34	WD repeat domain 34
ILMN_7975	0.324428	0.0306	-2.58313	-3.64736	-0.547905	FHL1	four and a half LIM domains 1
ILMN_8980	0.324428	0.0306	-2.58304	-3.6475	-0.505994	EPB41L4B	erythrocyte membrane protein band 4.1 like 4B
ILMN_4789	0.324428	0.0306	2.58302	-3.64754	0.557793	SPATA12	spermatogenesis associated 12
ILMN_23209	0.324428	0.0306	-2.58298	-3.64759	-1.00119	DPT	dermatopontin
ILMN_18288	0.324428	0.0306	-2.58262	-3.64815	-1.00921	FCER1A	Fc fragment of IgE receptor Ia
ILMN_26478	0.324428	0.0306	2.58253	-3.64829	0.436138	CORO1B	coronin 1B
ILMN_5574	0.324428	0.0306	-2.58228	-3.64866	-0.468163	C17orf50	chromosome 17 open reading frame 50
ILMN_1026	0.324536	0.0306	2.58175	-3.64948	0.589873	SP110	SP110 nuclear body protein
ILMN_25786	0.324536	0.0307	-2.58144	-3.64995	-0.687986	ZNF502	zinc finger protein 502
ILMN_3848	0.324685	0.0307	-2.58075	-3.65101	-0.492475	CHCHD7	coiled-coil-helix-coiled-coil-helix domain containing 7
ILMN_3317	0.324685	0.0307	-2.58052	-3.65136	-0.59253	GAB2	GRB2 associated binding protein 2
ILMN_4030	0.324794	0.0307	-2.57999	-3.65217	-0.628952	GML	glycosylphosphatidylinositol anchored molecule like
ILMN_5415	0.325277	0.0308	-2.57875	-3.65407	-0.501166
ILMN_14756	0.325355	0.0308	2.57828	-3.65478	0.49509
ILMN_28113	0.325414	0.0308	-2.57781	-3.6555	-0.442088	FAM45A	family with sequence similarity 45 member A
ILMN_26016	0.325414	0.0309	-2.57753	-3.65593	-0.479442	C11orf1	chromosome 11 open reading frame 1
ILMN_16398	0.325429	0.0309	2.57718	-3.65646	0.544434	SFXN1	sideroflexin 1
ILMN_26682	0.325832	0.0309	2.57609	-3.65812	0.619761	TAPBP	TAP binding protein (tapasin)
ILMN_11103	0.325888	0.031	2.57552	-3.659	0.476176	TMEM2	transmembrane protein 2
ILMN_11155	0.325888	0.031	-2.57535	-3.65925	-0.810537	C4orf3	chromosome 4 open reading frame 3
ILMN_5539	0.326074	0.031	2.57441	-3.66069	0.519156	LDLRAD1	low density lipoprotein receptor class A domain containing 1
ILMN_21160	0.326074	0.031	-2.57436	-3.66076	-0.747849	SLC16A7	solute carrier family 16 member 7
ILMN_3757	0.326676	0.0311	2.57286	-3.66305	0.581871	RHBDD3	rhomboid domain containing 3
ILMN_23425	0.326676	0.0311	2.57214	-3.66415	0.675405	ANXA4	annexin A4
ILMN_1309	0.326676	0.0311	2.57178	-3.66471	0.863003	KCNV1	potassium voltage-gated channel modifier subfamily V member 1
ILMN_19416	0.326676	0.0311	-2.57176	-3.66474	-1.11389	PON3	paraoxonase 3
ILMN_7892	0.326676	0.0311	2.57163	-3.66494	0.622922	NCF4	neutrophil cytosolic factor 4
ILMN_24248	0.327099	0.0312	-2.57006	-3.66733	-0.461211	WWTR1	WW domain containing transcription regulator 1
ILMN_25066	0.327099	0.0312	-2.56974	-3.66782	-0.756821	PEX7	peroxisomal biogenesis factor 7
ILMN_26858	0.327099	0.0313	2.56946	-3.66824	0.469874	VAX1	ventral anterior homeobox 1
ILMN_13360	0.327099	0.0313	-2.56942	-3.66831	-0.583096	KLHL26	kelch like family member 26
ILMN_20374	0.327099	0.0313	-2.56924	-3.66858	-0.512165	RSL24D1	ribosomal L24 domain containing 1
ILMN_18628	0.32728	0.0313	-2.56858	-3.66958	-0.73356	CBR1	carbonyl reductase 1
ILMN_19154	0.327363	0.0313	2.56811	-3.67031	0.81491	FPR3	formyl peptide receptor 3
ILMN_11118	0.327793	0.0314	2.56651	-3.67276	0.526418	C8orf37	chromosome 8 open reading frame 37
ILMN_11523	0.327793	0.0314	2.56643	-3.67288	0.565418	TTC13	tetratricopeptide repeat domain 13
ILMN_7749	0.327793	0.0314	-2.56615	-3.6733	-0.496124	GRPEL1	GrpE like 1, mitochondrial
ILMN_6363	0.327793	0.0314	-2.56604	-3.67348	-0.556988	ZNF84	zinc finger protein 84
ILMN_28654	0.328171	0.0315	-2.56472	-3.67548	-0.466057	SCAMP1	secretory carrier membrane protein 1
ILMN_139385	0.328171	0.0315	-2.56441	-3.67595	-0.847284	SUSD4	sushi domain containing 4
ILMN_7938	0.328171	0.0315	-2.56438	-3.67601	-0.691499	NUDT14	nudix hydrolase 14
ILMN_13830	0.328583	0.0316	-2.56313	-3.67791	-0.42598	VPS36	vacuolar protein sorting 36 homolog
ILMN_3040	0.328583	0.0316	-2.56297	-3.67816	-0.503513	LIMD1	LIM domains containing 1
ILMN_5102	0.32878	0.0316	-2.56221	-3.67931	-0.492106	RANGRF	RAN guanine nucleotide release factor
ILMN_7952	0.32878	0.0316	2.5618	-3.67994	0.503176	DHDH	dihydrodiol dehydrogenase
ILMN_6623	0.32878	0.0317	2.56155	-3.68032	1.33078	HSPA1A	heat shock protein family A (Hsp70) member 1A
ILMN_138841	0.32878	0.0317	2.5613	-3.6807	0.49618	RABGAP1L	RAB GTPase activating protein 1 like
ILMN_24313	0.32878	0.0317	-2.56101	-3.68116	-0.43565	TRIM54	tripartite motif containing 54
ILMN_15801	0.32878	0.0317	-2.56071	-3.6816	-0.486493	ARHGAP22	Rho GTPase activating protein 22
ILMN_21937	0.328965	0.0317	-2.55979	-3.68301	-0.753369	NRXN1	neurexin 1
ILMN_22387	0.328965	0.0317	2.55974	-3.68309	0.485555	MTERF1	mitochondrial transcription termination factor 1
ILMN_6468	0.328972	0.0318	2.55941	-3.68359	0.78517	ATF3	activating transcription factor 3
ILMN_6436	0.329035	0.0318	2.55898	-3.68425	0.54896	ECT2	epithelial cell transforming 2
ILMN_29072	0.329162	0.0318	-2.55815	-3.68552	-0.448454	TGFB1	transforming growth factor beta 1
ILMN_3862	0.329162	0.0318	-2.55805	-3.68567	-0.806106	CSRP2	cysteine and glycine rich protein 2
ILMN_17501	0.329162	0.0319	-2.55769	-3.68622	-0.620548	TATDN1	TatD DNase domain containing 1
ILMN_19044	0.329162	0.0319	-2.55749	-3.68652	-0.717266	CCIN	calicin
ILMN_16816	0.329376	0.0319	2.55635	-3.68827	0.414246	HDGF	hepatoma-derived growth factor
ILMN_7680	0.329376	0.0319	2.55633	-3.68829	0.471082	FKBP3	FK506 binding protein 3
ILMN_12494	0.329376	0.0319	2.55582	-3.68908	0.460413	E2F3	E2F transcription factor 3
ILMN_2228	0.329376	0.032	-2.5556	-3.68941	-0.571872	STOX1	storkhead box 1
ILMN_13936	0.329376	0.032	2.55497	-3.69036	0.57699	GBP2	guanylate binding protein 2
ILMN_139404	0.329376	0.032	-2.55435	-3.69131	-0.410363	APPL2	adaptor protein, phosphotyrosine interacting with PH domain and leucine zipper 2
[truncated: 18,590 more rows]
