# Supplementary material for: Identification of DEGs and transcription factors involved in H. pylori-associated inflammation and their relevance with gastric cancer
Source: PeerJ. 2020 Jun 3;8:e9223. doi: 10.7717/peerj.9223 (PMC7275685; doi:10.7717/peerj.9223)
Supplement: Table S2 — For the data set with the GEO accession number GSE27411,three cases of H. pylori infection without corpus-predominant AG (Hp+-NAG) and three cases of H. pylori infection with corpus-predominant AG (Hp+-AG-IM) were included. GEO2R was undertook to screen DEGs between Hp+-NAG and Hp+-AG-IM. [file peerj-08-9223-s002.xlsx]

## Sheet: 27411萎缩
ID	adj.P.Val	P.Value	t	B	logFC	Gene.symbol	Gene.title
ILMN_13361	1.112e-05	9.18e-09	23.0162	10.5246	8.26953	APOA4	apolipoprotein A4
ILMN_2556	0.00036613	1.26e-06	12.4498	6.14101	8.22247	DEFA5	defensin alpha 5
ILMN_21713	4.746e-05	8.07e-08	17.5882	8.71779	8.21643	RBP2	retinol binding protein 2
ILMN_14341	7.1e-06	3.8e-09	25.6535	11.1833	8.08148	CLCA1	chloride channel accessory 1
ILMN_23553	0.00570445	5.24e-05	7.63477	2.33762	7.78928	GAST	gastrin
ILMN_10479	0.0013807	7.78e-06	9.84782	4.3147	7.73796	DEFA6	defensin alpha 6
ILMN_6712	9.3e-06	7.22e-09	23.7051	10.7081	7.42252	MEP1A	meprin A subunit alpha
ILMN_13769	7.1e-06	4.14e-09	25.3878	11.122	7.33851	SPINK4	serine peptidase inhibitor, Kazal type 4
ILMN_1446	2.775e-05	3.91e-08	19.2439	9.34665	7.3275	GBA3	glucosylceramidase beta 3 (gene/pseudogene)
ILMN_27150	4.12e-06	1.4e-09	28.9996	11.8711	7.25132	SI	sucrase-isomaltase
ILMN_28286	9.05e-06	6.59e-09	23.9745	10.7775	7.23872	ZG16	zymogen granule protein 16
ILMN_14208	3.3e-06	3.21e-10	34.7312	12.7652	7.17058	MTTP	microsomal triglyceride transfer protein
ILMN_20088	4.12e-06	8.33e-10	30.9027	12.2026	7.09469	ANPEP	alanyl aminopeptidase, membrane
ILMN_11988	7.1e-06	3.49e-09	25.9263	11.2451	7.04114	FABP1	fatty acid binding protein 1
ILMN_20358	4.12e-06	1.12e-09	29.8046	12.016	7.03944	SLC7A9	solute carrier family 7 member 9
ILMN_26019	0.00012175	2.66e-07	15.153	7.6326	6.91991	TM4SF20	transmembrane 4 L six family member 20
ILMN_12437	0.0301186	0.000527	5.48908	-0.09929	6.87662	REG1B	regenerating family member 1 beta
ILMN_21833	3.32e-05	5e-08	18.6656	9.13587	6.86418	SLC26A3	solute carrier family 26 member 3
ILMN_15726	4.23e-06	1.64e-09	28.4325	11.7646	6.69	CPS1	carbamoyl-phosphate synthase 1
ILMN_14774	0.00018866	5.22e-07	13.9209	6.99561	6.67743	CDH17	cadherin 17
ILMN_6502	2.746e-05	3.33e-08	19.6271	9.4814	6.3716	TFF3	trefoil factor 3
ILMN_11273	0.00126404	7.06e-06	9.97331	4.41375	6.35499	MS4A10	membrane spanning 4-domains A10
ILMN_4236	0.00047795	1.88e-06	11.8314	5.7467	6.34787	APOC3	apolipoprotein C3
ILMN_16288	2.311e-05	2.58e-08	20.2582	9.6953	6.30186	OTC	ornithine carbamoyltransferase
ILMN_7582	3.3e-06	2.71e-10	35.4565	12.8584	6.29283	CHP2	calcineurin like EF-hand protein 2
ILMN_28605	4.12e-06	1.28e-09	29.3247	11.9305	6.1285	MEP1B	meprin A subunit beta
ILMN_9286	6.193e-05	1.16e-07	16.8147	8.39552	6.04039	APOB	apolipoprotein B
ILMN_19968	4.24e-06	1.85e-09	28.0141	11.6835	5.9354	C17orf78	chromosome 17 open reading frame 78
ILMN_586	4.12e-06	8.86e-10	30.6679	12.1637	5.76458	ITLN1	intelectin 1
ILMN_23504	0.0021262	1.41e-05	9.10566	3.70228	5.70982	APOA1	apolipoprotein A1
ILMN_23281	0.00087346	4.12e-06	10.6975	4.96194	5.6784	TMPRSS15	transmembrane protease, serine 15
ILMN_27843	1.927e-05	1.97e-08	20.9525	9.91953	5.64147	CDX1	caudal type homeobox 1
ILMN_19162	5.631e-05	1.01e-07	17.0991	8.51626	5.51809	SLC51A	solute carrier family 51 alpha subunit
ILMN_450	0.00018866	5.16e-07	13.9433	7.00778	5.50938
ILMN_28285	2.899e-05	4.22e-08	19.0599	9.28055	5.50216	SLC2A2	solute carrier family 2 member 2
ILMN_3605	0.00036613	1.29e-06	12.4198	6.12239	5.49354	ADH4	alcohol dehydrogenase 4 (class II), pi polypeptide
ILMN_29692	0.00744058	7.48e-05	7.26922	1.96312	5.40366	DEFA1	defensin alpha 1
ILMN_14792	0.00122569	6.67e-06	10.0481	4.47217	5.39953	FOLH1	folate hydrolase (prostate-specific membrane antigen) 1
ILMN_20085	2.035e-05	2.17e-08	20.6931	9.83708	5.36165	SLC3A1	solute carrier family 3 member 1
ILMN_15024	1.833e-05	1.78e-08	21.21	9.99994	5.35029	NAT2	N-acetyltransferase 2
ILMN_13770	0.00020019	5.74e-07	13.7571	6.90584	5.28546	CCL25	C-C motif chemokine ligand 25
ILMN_14803	2.775e-05	3.8e-08	19.309	9.36982	4.91493	SLC39A5	solute carrier family 39 member 5
ILMN_23537	0.188031	0.00981	3.34106	-3.17626	4.9007	PNLIP	pancreatic lipase
ILMN_15947	5.537e-05	9.68e-08	17.1937	8.55584	4.89218	PRAP1	proline rich acidic protein 1
ILMN_17723	0.0159631	0.000214	6.26746	0.85417	4.87578	CYP3A4	cytochrome P450 family 3 subfamily A member 4
ILMN_29326	9.875e-05	2.06e-07	15.6446	7.86907	4.8283	GIP	gastric inhibitory polypeptide
ILMN_8970	0.00106961	5.61e-06	10.2763	4.64789	4.80267	ALDOB	aldolase, fructose-bisphosphate B
ILMN_10988	6.749e-05	1.31e-07	16.5557	8.28318	4.72817	CLDN3	claudin 3
ILMN_6396	7.88e-06	5.36e-09	24.5914	10.9319	4.71749	GUCY2C	guanylate cyclase 2C
ILMN_7361	0.00012742	2.86e-07	15.0195	7.5667	4.64725	MME	membrane metallo-endopeptidase
ILMN_21980	2.598e-05	3.03e-08	19.8618	9.56211	4.63523	LRRC19	leucine rich repeat containing 19
ILMN_1556	0.0128209	0.000162	6.52302	1.14918	4.57282	TM4SF4	transmembrane 4 L six family member 4
ILMN_22077	7.88e-06	5.27e-09	24.6427	10.9445	4.53827	CAMK2N1	calcium/calmodulin dependent protein kinase II inhibitor 1
ILMN_20248	0.00033721	1.09e-06	12.678	6.28096	4.49455	DPP4	dipeptidyl peptidase 4
ILMN_14785	0.00363748	2.83e-05	8.29784	2.97959	4.49246	SLC2A5	solute carrier family 2 member 5
ILMN_14423	4.381e-05	7.02e-08	17.8947	8.84022	4.41109	VIL1	villin 1
ILMN_24451	1.762e-05	1.63e-08	21.4489	10.0732	4.34582	SLC5A1	solute carrier family 5 member 1
ILMN_17243	0.00087346	4.27e-06	10.6468	4.92478	4.28795	CDX2	caudal type homeobox 2
ILMN_6384	4.599e-05	7.59e-08	17.721	8.7712	4.27003	ADGRG7	adhesion G protein-coupled receptor G7
ILMN_27145	3.498e-05	5.44e-08	18.4722	9.0633	4.21682	CLRN3	clarin 3
ILMN_13951	0.00087346	4.28e-06	10.642	4.92126	4.16105	TUBAL3	tubulin alpha like 3
ILMN_4968	0.00058441	2.44e-06	11.4422	5.48681	4.11695	ABCG8	ATP binding cassette subfamily G member 8
ILMN_29462	0.00011343	2.42e-07	15.3312	7.71939	4.10303	CLDN15	claudin 15
ILMN_4255	0.00871959	9.28e-05	7.05527	1.73673	4.10096	HKDC1	hexokinase domain containing 1
ILMN_8328	0.0359384	0.000672	5.28954	-0.35759	4.05842	REG4	regenerating family member 4
ILMN_30037	0.00039102	1.42e-06	12.2584	6.02134	4.05039	SLC51B	solute carrier family 51 beta subunit
ILMN_19552	0.00033721	1.08e-06	12.6954	6.29153	4.02374	GCG	glucagon
ILMN_26080	0.00017746	4.61e-07	14.1434	7.11562	4.00889	ACE2	angiotensin I converting enzyme 2
ILMN_26946	0.082083	0.00237	4.32299	-1.69127	3.99546	CEL	carboxyl ester lipase
ILMN_10719	0.00327116	2.48e-05	8.44824	3.11888	3.98176	GPA33	glycoprotein A33
ILMN_18268	0.00013112	3.06e-07	14.8916	7.50286	3.94382	FABP2	fatty acid binding protein 2
ILMN_962	0.00017719	4.48e-07	14.1947	7.14297	3.92006	PLA2G12B	phospholipase A2 group XIIB
ILMN_22653	0.00017924	4.79e-07	14.0743	7.0786	3.91283
ILMN_4084	0.00036613	1.22e-06	12.504	6.17453	3.8755
ILMN_13520	0.00017211	4.18e-07	14.3173	7.20782	3.86892	DDC	dopa decarboxylase
ILMN_828	0.0338606	0.000625	5.34851	-0.28065	3.82182	ITLN2	intelectin 2
ILMN_22750	0.00301359	2.18e-05	8.59408	3.25184	3.79352	ENPEP	glutamyl aminopeptidase
ILMN_11327	0.00089717	4.47e-06	10.5848	4.87918	3.74245	SLC15A1	solute carrier family 15 member 1
ILMN_4558	0.116833	0.00398	3.95437	-2.23502	3.73409	OLFM4	olfactomedin 4
ILMN_627	0.0426132	0.000873	5.07989	-0.63523	3.72454	ANXA13	annexin A13
ILMN_28625	2.775e-05	3.82e-08	19.2982	9.36599	3.72223	ABCA4	ATP binding cassette subfamily A member 4
ILMN_28374	0.00646265	6.18e-05	7.46267	2.1632	3.70203	UGT1A1	UDP glucuronosyltransferase family 1 member A1
ILMN_15192	0.00087346	4.24e-06	10.6575	4.93262	3.69378	REEP6	receptor accessory protein 6
ILMN_2779	1.431e-05	1.25e-08	22.155	10.2827	3.63372
ILMN_13160	0.00660978	6.45e-05	7.41904	2.11845	3.57986	SERPINB5	serpin family B member 5
ILMN_20449	0.0190688	0.000278	6.03478	0.57796	3.5767	CHGB	chromogranin B
ILMN_1158	0.00781762	7.9e-05	7.21481	1.90606	3.55093	FOLH1	folate hydrolase (prostate-specific membrane antigen) 1
ILMN_7660	0.00086875	4.05e-06	10.7196	4.97804	3.55008	CREB3L3	cAMP responsive element binding protein 3 like 3
ILMN_6386	6.193e-05	1.17e-07	16.7872	8.38369	3.52716	A1CF	APOBEC1 complementation factor
ILMN_3632	0.0211499	0.000329	5.88803	0.39996	3.5047
ILMN_1016	0.00046712	1.82e-06	11.8849	5.78174	3.5031	C8G	complement component 8, gamma polypeptide
ILMN_14617	0.0008516	3.85e-06	10.7915	5.03022	3.49706	UGT2A3	UDP glucuronosyltransferase family 2 member A3
ILMN_24997	0.00012742	2.91e-07	14.9848	7.54944	3.46199	TRIM15	tripartite motif containing 15
ILMN_17827	0.00089717	4.53e-06	10.5651	4.86455	3.45195	SCG2	secretogranin II
ILMN_13755	0.0781435	0.00224	4.36621	-1.62873	3.42809	CLDN7	claudin 7
ILMN_29779	0.0021262	1.41e-05	9.10526	3.70194	3.31456	S100G	S100 calcium binding protein G
ILMN_17870	0.0286857	0.00049	5.54823	-0.02384	3.29098	MALL	mal, T-cell differentiation protein like
ILMN_20153	0.00046712	1.8e-06	11.8964	5.78921	3.24576	RNF186	ring finger protein 186
ILMN_11936	0.00192448	1.2e-05	9.30147	3.86842	3.21998	MS4A8	membrane spanning 4-domains A8
ILMN_7949	0.00098565	5.03e-06	10.4241	4.75952	3.21198	HEPH	hephaestin
ILMN_10644	0.00017619	4.36e-07	14.2397	7.16682	3.20253	SSUH2	ssu-2 homolog (C. elegans)
ILMN_29550	2.775e-05	3.86e-08	19.2741	9.3574	3.1966	ALPI	alkaline phosphatase, intestinal
ILMN_18140	0.00166306	1.01e-05	9.51694	4.0474	3.17619	SLC35G1	solute carrier family 35 member G1
ILMN_16830	0.00036613	1.27e-06	12.4388	6.13417	3.16921	PRR4	proline rich 4 (lacrimal)
ILMN_29655	0.00074847	3.31e-06	11.0006	5.18007	3.16789	KHK	ketohexokinase
ILMN_6962	0.317643	0.0303	2.61239	-4.32846	3.16659	CLPS	colipase
ILMN_19859	0.0109519	0.000131	6.72495	1.37628	3.15102	SLC17A8	solute carrier family 17 member 8
ILMN_22654	0.00139172	7.91e-06	9.82656	4.29779	3.07074	TLDC2	TBC/LysM-associated domain containing 2
ILMN_6464	9.079e-05	1.85e-07	15.8566	7.96813	3.05575	EDN3	endothelin 3
ILMN_16539	0.00296477	2.12e-05	8.62551	3.28021	3.04008	BCO1	beta-carotene oxygenase 1
ILMN_6666	0.0496241	0.00112	4.88495	-0.89919	3.03598	BTNL3	butyrophilin like 3
ILMN_8663	0.0840215	0.00247	4.29394	-1.73344	3.00683	NAT8B	N-acetyltransferase 8B (putative, gene/pseudogene)
ILMN_18211	0.00086875	4.02e-06	10.7302	4.98578	2.97394
ILMN_5693	0.244911	0.017	2.98352	-3.73991	2.9734	REG3G	regenerating family member 3 gamma
ILMN_26119	0.00033721	1.1e-06	12.6722	6.27747	2.96403	RGS2	regulator of G-protein signaling 2
ILMN_25193	0.191194	0.0102	3.31655	-3.21464	2.92763	CGA	glycoprotein hormones, alpha polypeptide
ILMN_13069	0.0184691	0.000266	6.07182	0.62243	2.91657	PLA2G2A	phospholipase A2 group IIA
ILMN_1950	0.00342755	2.63e-05	8.38115	3.05703	2.91627	MYRFL	myelin regulatory factor-like
ILMN_7599	0.002904	2e-05	8.69121	3.33924	2.90128	MARVELD3	MARVEL domain containing 3
ILMN_8618	0.00074847	3.28e-06	11.0137	5.18936	2.88033	NPC1L1	NPC1 like intracellular cholesterol transporter 1
ILMN_24929	0.00153909	8.97e-06	9.66583	4.16879	2.87429	PDZK1	PDZ domain containing 1
ILMN_11569	0.00192448	1.21e-05	9.2972	3.86484	2.87318	CIDEB	cell death-inducing DFFA-like effector b
ILMN_29135	0.00026173	7.75e-07	13.2428	6.61539	2.8719	ADH6	alcohol dehydrogenase 6 (class V)
ILMN_27517	0.00541853	4.82e-05	7.72256	2.42532	2.84222	ACOX2	acyl-CoA oxidase 2
ILMN_23895	0.00039102	1.41e-06	12.269	6.02805	2.8385	MOGAT2	monoacylglycerol O-acyltransferase 2
ILMN_14062	0.203475	0.0117	3.22479	-3.35874	2.82844
ILMN_1403	0.00862008	9.02e-05	7.08237	1.7657	2.82058	SLC23A3	solute carrier family 23 member 3
ILMN_25315	0.00072744	3.11e-06	11.0918	5.2445	2.80991	PFKFB4	6-phosphofructo-2-kinase/fructose-2,6-biphosphatase 4
ILMN_4987	0.002904	2.02e-05	8.68419	3.33295	2.80663	AOC1	amine oxidase, copper containing 1
ILMN_1906	0.00251938	1.71e-05	8.87498	3.50217	2.7808	DSG3	desmoglein 3
ILMN_25170	0.00724204	7.21e-05	7.30625	2.00176	2.74893	EPDR1	ependymin related 1
ILMN_2603	0.00166306	1.01e-05	9.51958	4.04957	2.72115	PCK2	phosphoenolpyruvate carboxykinase 2, mitochondrial
ILMN_22042	0.0201151	0.000301	5.96586	0.49474	2.71915	SLC6A4	solute carrier family 6 member 4
ILMN_17972	0.0337676	0.000622	5.3529	-0.27495	2.71805	GSTA5	glutathione S-transferase alpha 5
ILMN_25079	0.00114612	6.18e-06	10.1482	4.54971	2.69143	SLC19A3	solute carrier family 19 member 3
ILMN_17486	0.042147	0.000854	5.09803	-0.61096	2.68855	PRODH	proline dehydrogenase 1
ILMN_29070	0.00196947	1.25e-05	9.25011	3.82517	2.68803	MOGAT3	monoacylglycerol O-acyltransferase 3
ILMN_22479	0.0117334	0.000142	6.6463	1.28845	2.67629	UGT2B7	UDP glucuronosyltransferase family 2 member B7
ILMN_15043	0.00046712	1.81e-06	11.889	5.78439	2.67419	FLVCR2	feline leukemia virus subgroup C cellular receptor family member 2
ILMN_1501	0.0117473	0.000143	6.64142	1.28297	2.67224	HEPACAM2	HEPACAM family member 2
ILMN_23397	0.00388597	3.21e-05	8.16001	2.84993	2.64545	MLN	motilin
ILMN_5567	0.134521	0.00524	3.76325	-2.52388	2.63426	EPHB1	EPH receptor B1
ILMN_14912	0.00036613	1.29e-06	12.4168	6.12049	2.63405	NR5A2	nuclear receptor subfamily 5 group A member 2
ILMN_7952	0.0272846	0.000452	5.61668	0.06285	2.62776	DHDH	dihydrodiol dehydrogenase
ILMN_27505	0.00621741	5.89e-05	7.51296	2.21452	2.62275	ABCG2	ATP binding cassette subfamily G member 2 (Junior blood group)
ILMN_25284	0.00111903	5.98e-06	10.1918	4.58329	2.62268
ILMN_14465	0.00318525	2.37e-05	8.49987	3.16619	2.5979	EPB41L3	erythrocyte membrane protein band 4.1 like 3
ILMN_7609	0.00019465	5.48e-07	13.8358	6.9491	2.59546	XPNPEP2	X-prolyl aminopeptidase 2
ILMN_13440	0.00049076	1.95e-06	11.7729	5.70824	2.59069	C2orf88	chromosome 2 open reading frame 88
ILMN_15126	7.155e-05	1.42e-07	16.3848	8.20781	2.57398	NAALADL1	N-acetylated alpha-linked acidic dipeptidase-like 1
ILMN_8635	0.0256643	0.000413	5.69342	0.15924	2.55886	WDR72	WD repeat domain 72
ILMN_19040	0.0396748	0.000771	5.17924	-0.50286	2.55833	CCK	cholecystokinin
ILMN_4657	0.00179272	1.1e-05	9.41359	3.96205	2.55501	GPD1	glycerol-3-phosphate dehydrogenase 1
ILMN_3558	0.00655379	6.33e-05	7.43796	2.13789	2.55211	ACOT7	acyl-CoA thioesterase 7
ILMN_12653	0.123444	0.00437	3.88867	-2.33382	2.53794	CPO	carboxypeptidase O
ILMN_19972	0.00154383	9.15e-06	9.64102	4.14869	2.51841	CLDN2	claudin 2
ILMN_3814	0.00363866	2.86e-05	8.28624	2.96875	2.50646	SLC52A1	solute carrier family 52 member 1
ILMN_6950	0.131542	0.00498	3.79849	-2.47028	2.49927	SCG5	secretogranin V
ILMN_2033	0.00017746	4.65e-07	14.1247	7.10561	2.4978	CYP27A1	cytochrome P450 family 27 subfamily A member 1
ILMN_28388	0.127721	0.00463	3.84802	-2.39521	2.49621	SLC39A4	solute carrier family 39 member 4
ILMN_18787	0.00100702	5.18e-06	10.3823	4.72814	2.47692	PCK2	phosphoenolpyruvate carboxykinase 2, mitochondrial
ILMN_4235	0.0237598	0.000377	5.76935	0.2538	2.45966	AGMO	alkylglycerol monooxygenase
ILMN_20625	0.00387078	3.12e-05	8.19058	2.87886	2.45664	KBTBD11	kelch repeat and BTB domain containing 11
ILMN_8355	0.00086461	3.95e-06	10.7555	5.00413	2.45549	KHK	ketohexokinase
ILMN_10128	0.0120536	0.000149	6.60284	1.23958	2.44896	GK	glycerol kinase
ILMN_10184	0.00062277	2.63e-06	11.3324	5.4117	2.44151	MARVELD3	MARVEL domain containing 3
ILMN_17143	0.162201	0.00735	3.53342	-2.87682	2.43451	XDH	xanthine dehydrogenase
ILMN_7395	0.00154004	9.05e-06	9.65454	4.15965	2.42027	ABCB1	ATP binding cassette subfamily B member 1
ILMN_15329	0.00605254	5.61e-05	7.56219	2.26447	2.41119	OTOP3	otopetrin 3
ILMN_16478	0.00725471	7.26e-05	7.29958	1.99481	2.40532
ILMN_7370	0.00318525	2.39e-05	8.48803	3.15537	2.397	METTL7B	methyltransferase like 7B
ILMN_12069	0.0003977	1.47e-06	12.2113	5.99158	2.3924	DHRS11	dehydrogenase/reductase 11
ILMN_10066	0.00089717	4.52e-06	10.5671	4.86607	2.39177	PHLPP2	PH domain and leucine rich repeat protein phosphatase 2
ILMN_24566	0.00029253	8.95e-07	13.0042	6.47615	2.38382	FUT6	fucosyltransferase 6
ILMN_21475	0.185449	0.0095	3.36197	-3.14357	2.37621	ACMSD	aminocarboxymuconate semialdehyde decarboxylase
ILMN_22045	0.00192448	1.2e-05	9.30539	3.87172	2.37605	PHYHIPL	phytanoyl-CoA 2-hydroxylase interacting protein like
ILMN_29456	0.0464213	0.00101	4.96397	-0.79152	2.37539	PCK1	phosphoenolpyruvate carboxykinase 1
ILMN_1503	0.00250523	1.69e-05	8.89009	3.51542	2.36697	CCND2	cyclin D2
ILMN_8234	0.0309142	0.000551	5.45164	-0.14732	2.36097	PCSK1N	proprotein convertase subtilisin/kexin type 1 inhibitor
ILMN_14268	0.00033721	1.08e-06	12.6972	6.29261	2.33953	FUOM	fucose mutarotase
ILMN_19796	0.00016512	3.93e-07	14.4289	7.26628	2.33326	MPP1	membrane palmitoylated protein 1
ILMN_28235	0.229113	0.0146	3.08204	-3.58393	2.32676	CTRB2	chymotrypsinogen B2
ILMN_24809	0.00036613	1.3e-06	12.4042	6.11266	2.32122	PPP1R14D	protein phosphatase 1 regulatory inhibitor subunit 14D
ILMN_138636	0.00051059	2.08e-06	11.6773	5.64491	2.31771	CFTR	cystic fibrosis transmembrane conductance regulator
ILMN_28610	0.00617611	5.82e-05	7.52515	2.22691	2.30656	NT5E	5'-nucleotidase ecto
ILMN_11196	0.0359703	0.000676	5.28463	-0.36402	2.3053	TSSK2	testis specific serine kinase 2
ILMN_26967	0.049268	0.0011	4.89776	-0.88167	2.30143	ENPP3	ectonucleotide pyrophosphatase/phosphodiesterase 3
ILMN_137475	0.00123368	6.77e-06	10.0279	4.45647	2.30012	CNTNAP2	contactin associated protein-like 2
ILMN_19014	0.0123021	0.000153	6.57593	1.20919	2.27792	HSD17B2	hydroxysteroid 17-beta dehydrogenase 2
ILMN_30033	0.00073905	3.19e-06	11.0531	5.21724	2.2454	ILDR1	immunoglobulin like domain containing receptor 1
ILMN_1824	0.00313489	2.3e-05	8.53364	3.19699	2.24093	CIB2	calcium and integrin binding family member 2
ILMN_137423	0.0172689	0.000241	6.16191	0.72979	2.23672	CDA	cytidine deaminase
ILMN_12262	0.00027839	8.38e-07	13.1126	6.53982	2.20949	SFRP5	secreted frizzled related protein 5
ILMN_27530	0.00347036	2.68e-05	8.36012	3.03754	2.19773	LAMA1	laminin subunit alpha 1
ILMN_21651	0.00393939	3.27e-05	8.13854	2.82957	2.17952	CEACAM1	carcinoembryonic antigen related cell adhesion molecule 1
ILMN_28536	0.00023307	6.79e-07	13.4667	6.74344	2.17704	RUNDC3B	RUN domain containing 3B
ILMN_2233	0.0133693	0.000169	6.48065	1.10086	2.1761	LPL	lipoprotein lipase
ILMN_7287	0.00209343	1.36e-05	9.14929	3.7396	2.17316	ESPN	espin
ILMN_13435	0.00427554	3.59e-05	8.03634	2.73194	2.16973
ILMN_29629	0.148486	0.00626	3.64225	-2.70898	2.16755	C6orf58	chromosome 6 open reading frame 58
ILMN_22829	0.00862008	9.09e-05	7.07575	1.75864	2.1475	PEPD	peptidase D
ILMN_5225	0.0401274	0.000785	5.16421	-0.52278	2.12686	UGT2B11	UDP glucuronosyltransferase family 2 member B11
ILMN_18981	0.0045477	3.87e-05	7.95704	2.65544	2.12548	SLC30A10	solute carrier family 30 member 10
ILMN_9269	0.0102042	0.000115	6.84644	1.51042	2.1195	PLEKHS1	pleckstrin homology domain containing S1
ILMN_17145	0.0103725	0.000119	6.81027	1.47068	2.11824	DEPDC7	DEP domain containing 7
ILMN_8693	0.0639793	0.00162	4.60351	-1.29015	2.11608	PIPOX	pipecolic acid and sarcosine oxidase
ILMN_25067	0.00295402	2.07e-05	8.65638	3.308	2.08838	NR1H4	nuclear receptor subfamily 1 group H member 4
ILMN_6607	0.00105336	5.47e-06	10.3093	4.67291	2.08278	DGAT1	diacylglycerol O-acyltransferase 1
ILMN_12480	0.134521	0.00522	3.76617	-2.51943	2.06405	DKK4	dickkopf WNT signaling pathway inhibitor 4
ILMN_27185	0.00209343	1.36e-05	9.14844	3.73888	2.06288	ONECUT2	one cut homeobox 2
ILMN_13861	0.0142188	0.000182	6.41687	1.02769	2.05955	ZNF703	zinc finger protein 703
ILMN_25566	0.0448644	0.000949	5.01471	-0.72287	2.05312	HAPLN4	hyaluronan and proteoglycan link protein 4
ILMN_28257	0.00384762	3.06e-05	8.21061	2.89776	2.05266	PPP1R14C	protein phosphatase 1 regulatory inhibitor subunit 14C
ILMN_22053	0.0905547	0.00275	4.21527	-1.84826	2.04121	DPEP1	dipeptidase 1 (renal)
ILMN_19722	0.00139796	8.01e-06	9.80989	4.28451	2.04089	SLC46A3	solute carrier family 46 member 3
ILMN_12180	0.00046712	1.81e-06	11.8878	5.78364	2.03055	HNF4G	hepatocyte nuclear factor 4 gamma
ILMN_4554	0.0174014	0.000244	6.14889	0.71435	2.02866	TREH	trehalase
ILMN_16218	0.00110146	5.83e-06	10.2249	4.60869	2.02576	CHN2	chimerin 2
ILMN_22038	0.00566531	5.17e-05	7.64751	2.3504	2.01323	IYD	iodotyrosine deiodinase
ILMN_3909	0.00166003	9.92e-06	9.53941	4.06584	2.00795	B3GNT8	UDP-GlcNAc:betaGal beta-1,3-N-acetylglucosaminyltransferase 8
ILMN_1597	0.309218	0.0277	2.66814	-4.2402	2.0046
ILMN_14815	0.0167549	0.00023	6.20149	0.77661	2.00425	SLC1A1	solute carrier family 1 member 1
ILMN_4649	0.00318525	2.4e-05	8.48572	3.15325	2.00324	CYBRD1	cytochrome b reductase 1
ILMN_16426	0.0055054	4.92e-05	7.70008	2.40295	1.99747	LCN15	lipocalin 15
ILMN_2021	0.049268	0.0011	4.89605	-0.88401	1.99609	UGT2B17	UDP glucuronosyltransferase family 2 member B17
ILMN_5328	0.070666	0.00191	4.48032	-1.4649	1.99327	DMBT1	deleted in malignant brain tumors 1
ILMN_3458	0.00209343	1.35e-05	9.15575	3.74511	1.98784	YBX2	Y-box binding protein 2
ILMN_25297	0.00296185	2.1e-05	8.64007	3.29333	1.98071	AQP11	aquaporin 11
ILMN_18250	0.0278578	0.000468	5.58769	0.02622	1.97778	TMEM82	transmembrane protein 82
ILMN_4885	0.0455712	0.000978	4.99057	-0.75549	1.97316	UGT2B10	UDP glucuronosyltransferase family 2 member B10
ILMN_11654	0.0301186	0.000526	5.48957	-0.09867	1.94698	TNFRSF12A	TNF receptor superfamily member 12A
ILMN_6699	0.0120536	0.000149	6.60235	1.23903	1.94692	SLC25A34	solute carrier family 25 member 34
ILMN_13682	0.0394598	0.000761	5.18981	-0.48886	1.92976	SHD	Src homology 2 domain containing transforming protein D
ILMN_21866	0.0992813	0.00314	4.12037	-1.98789	1.92671	CEACAM6	carcinoembryonic antigen related cell adhesion molecule 6
ILMN_1381	0.00566531	5.15e-05	7.6529	2.3558	1.91749	SULT1A2	sulfotransferase family 1A member 2
ILMN_30360	0.124122	0.00441	3.88296	-2.34243	1.91495	LCT	lactase
ILMN_14050	0.0116594	0.00014	6.65605	1.29938	1.91248	TM6SF2	transmembrane 6 superfamily member 2
ILMN_2117	0.0421627	0.00086	5.09254	-0.6183	1.89869	PCSK1	proprotein convertase subtilisin/kexin type 1
ILMN_17473	0.047933	0.00107	4.92358	-0.84644	1.89743	APOBEC1	apolipoprotein B mRNA editing enzyme catalytic subunit 1
ILMN_7438	0.0123441	0.000154	6.5691	1.20147	1.89441	SLC27A2	solute carrier family 27 member 2
ILMN_23856	0.00387505	3.16e-05	8.17808	2.86704	1.88809	MATN2	matrilin 2
ILMN_28551	0.0214369	0.000336	5.8683	0.3758	1.88659	TM4SF5	transmembrane 4 L six family member 5
ILMN_29792	0.0108221	0.000128	6.74589	1.39953	0.992053	SLC25A20	solute carrier family 25 member 20
ILMN_2098	0.141859	0.00582	3.69157	-2.63334	1.88215	SCGN	secretagogin, EF-hand calcium binding protein
ILMN_10500	0.18284	0.00925	3.37959	-3.11602	1.87684	HTR4	5-hydroxytryptamine receptor 4
ILMN_23162	0.00660978	6.44e-05	7.42169	2.12117	1.87334	MATN2	matrilin 2
ILMN_21982	0.00049601	2e-06	11.7386	5.68563	1.87216	BAIAP2L2	BAI1 associated protein 2 like 2
ILMN_25534	0.0692938	0.00186	4.50104	-1.43536	1.85444	SLC4A7	solute carrier family 4 member 7
ILMN_18791	0.00388597	3.19e-05	8.16604	2.85565	1.85325	SOX6	SRY-box 6
ILMN_8426	0.00538143	4.74e-05	7.73916	2.44181	1.84736	OAT	ornithine aminotransferase
ILMN_20015	0.0195277	0.000288	6.00225	0.53877	1.83645	NPNT	nephronectin
ILMN_8232	0.181761	0.00902	3.3966	-3.08948	1.83531	CASP5	caspase 5
ILMN_11714	0.170879	0.00808	3.47032	-2.97468	1.82475	FOLH1B	folate hydrolase 1B
ILMN_16698	0.0124528	0.000157	6.5537	1.18403	1.8222	TRIM36	tripartite motif containing 36
ILMN_16026	0.367961	0.0438	2.37828	-4.69686	1.81429	CELA2A	chymotrypsin like elastase family member 2A
ILMN_19059	0.0081089	8.31e-05	7.16382	1.85227	1.80897	TMEM200A	transmembrane protein 200A
ILMN_26383	0.00669966	6.57e-05	7.40019	2.09905	1.80856	NELL2	neural EGFL like 2
ILMN_21376	0.00087346	4.17e-06	10.6793	4.94861	1.80715	KCNK16	potassium two pore domain channel subfamily K member 16
ILMN_656	0.0138903	0.000177	6.44186	1.05642	1.80118	SLC13A2	solute carrier family 13 member 2
ILMN_8634	0.0521394	0.0012	4.83205	-0.97179	1.79647	BEST4	bestrophin 4
ILMN_771	0.00885398	9.55e-05	7.02705	1.70645	1.78921
ILMN_17871	0.0089647	9.71e-05	7.01047	1.68863	1.78584	MESP1	mesoderm posterior bHLH transcription factor 1
ILMN_28192	0.101923	0.00326	4.09412	-2.02674	1.76157	ACY3	aminoacylase 3
ILMN_22153	0.00196838	1.24e-05	9.26015	3.83364	1.75859	TDP2	tyrosyl-DNA phosphodiesterase 2
ILMN_28309	0.216388	0.0129	3.16007	-3.46069	1.75561	POM121	POM121 transmembrane nucleoporin
ILMN_22751	0.0153977	0.000204	6.31012	0.90401	1.75463	EPHX2	epoxide hydrolase 2
ILMN_12902	0.0376111	0.000718	5.23623	-0.42757	1.74646	MFSD2A	major facilitator superfamily domain containing 2A
ILMN_29414	0.155758	0.00686	3.57978	-2.80518	1.74421	PRSS2	protease, serine 2
ILMN_22980	0.0311449	0.000557	5.44327	-0.15808	1.73873	GLTPD2	glycolipid transfer protein domain containing 2
ILMN_3050	0.0185944	0.000269	6.06288	0.61171	1.73864	GSTM4	glutathione S-transferase mu 4
ILMN_20489	0.136226	0.00542	3.74033	-2.55881	1.73653	GPD1L	glycerol-3-phosphate dehydrogenase 1-like
ILMN_28094	0.00074847	3.34e-06	10.9881	5.17117	1.72635	EMB	embigin
ILMN_12219	0.0104436	0.000121	6.79635	1.45534	1.72067	HSD17B11	hydroxysteroid 17-beta dehydrogenase 11
ILMN_9275	0.00608912	5.68e-05	7.55053	2.25267	1.71983	MYO1A	myosin IA
ILMN_11681	0.010293	0.000117	6.82844	1.49066	1.71385	PPP1R1B	protein phosphatase 1 regulatory inhibitor subunit 1B
ILMN_26607	0.175839	0.00842	3.44233	-3.0182	1.70368	MUC13	mucin 13, cell surface associated
ILMN_1673	0.0144316	0.000186	6.3963	1.00398	1.70045	ULBP1	UL16 binding protein 1
ILMN_18876	0.101313	0.00323	4.10054	-2.01722	1.69869	TFAP2A	transcription factor AP-2 alpha
ILMN_7268	0.0104847	0.000123	6.78397	1.44167	1.66416	TMEM139	transmembrane protein 139
ILMN_18218	0.00126404	7.06e-06	9.97362	4.414	1.64856	CCDC170	coiled-coil domain containing 170
ILMN_12201	0.00387505	3.16e-05	8.17615	2.86522	1.64735	C3orf70	chromosome 3 open reading frame 70
ILMN_28166	0.224881	0.014	3.10798	-3.54293	1.64187	GUCA2A	guanylate cyclase activator 2A
ILMN_17094	0.0201151	0.000301	5.96488	0.49355	1.63659	ACY1	aminoacylase 1
ILMN_12730	0.0170004	0.000235	6.18526	0.75744	0.958133	NR1I2	nuclear receptor subfamily 1 group I member 2
ILMN_14833	0.306185	0.027	2.68597	-4.21194	1.63448	DNASE1	deoxyribonuclease 1
ILMN_26859	0.0154015	0.000205	6.30658	0.89988	1.63246	PLS1	plastin 1
ILMN_23092	0.0091481	0.000101	6.97332	1.64856	1.62716	NAGS	N-acetylglutamate synthase
ILMN_10715	0.00910291	9.9e-05	6.99114	1.66779	1.61854	TPSG1	tryptase gamma 1
ILMN_22268	0.0100286	0.000112	6.87149	1.53785	1.6133	AKR1C4	aldo-keto reductase family 1, member C4
ILMN_14177	0.0585614	0.00141	4.70873	-1.14262	1.61128	SOWAHA	sosondowah ankyrin repeat domain family member A
ILMN_13807	0.0916393	0.0028	4.20215	-1.8675	1.60713	FAR2	fatty acyl-CoA reductase 2
ILMN_16615	0.284749	0.0233	2.7793	-4.06392	1.60694	PSG11	pregnancy specific beta-1-glycoprotein 11
ILMN_137813	0.382358	0.0476	2.3257	-4.77886	1.60616	CLIC5	chloride intracellular channel 5
ILMN_22426	0.0180931	0.000258	-6.099	0.65494	-0.943129	MYRF	myelin regulatory factor
ILMN_11282	0.0301186	0.000524	5.49357	-0.09355	1.60145	SEMA6A	semaphorin 6A
ILMN_29594	0.217313	0.013	3.15516	-3.46844	1.60097	HHLA2	HERV-H LTR-associating 2
ILMN_17570	0.261581	0.0197	2.88796	-3.89147	1.6008	TFPI2	tissue factor pathway inhibitor 2
ILMN_10621	0.00538143	4.76e-05	7.73558	2.43826	1.59707	CASP1	caspase 1
ILMN_30268	0.203475	0.0116	3.22832	-3.35318	1.5958	SERPINA1	serpin family A member 1
ILMN_15343	0.0211257	0.000326	5.89445	0.40781	1.59429	ZNF488	zinc finger protein 488
ILMN_21205	0.00624953	5.95e-05	7.50238	2.20374	1.5901	RBKS	ribokinase
ILMN_6288	0.0180468	0.000256	6.10733	0.66488	1.57764	HSD11B2	hydroxysteroid 11-beta dehydrogenase 2
ILMN_12238	0.202588	0.0115	3.23873	-3.33681	1.57065	RARRES1	retinoic acid receptor responder 1
ILMN_22621	0.0210223	0.000323	5.90417	0.41969	1.57056	TBX3	T-box 3
ILMN_3575	0.00649253	6.24e-05	7.45274	2.15304	1.57009	TKFC	triokinase and FMN cyclase
ILMN_9212	0.179414	0.00874	3.41722	-3.05732	1.56912	PMP22	peripheral myelin protein 22
ILMN_7357	0.126267	0.00454	3.86257	-2.3732	1.56305	MISP	mitotic spindle positioning
ILMN_3091	0.00305372	2.22e-05	8.57124	3.23115	1.55456	FAM3C	family with sequence similarity 3 member C
ILMN_776	0.0103408	0.000119	6.81726	1.47837	1.55148	LPGAT1	lysophosphatidylglycerol acyltransferase 1
ILMN_6467	0.0448644	0.000951	5.01321	-0.7249	1.54693	TPK1	thiamin pyrophosphokinase 1
ILMN_23377	0.181761	0.00904	3.3951	-3.09182	1.54642	BPIFB1	BPI fold containing family B member 1
ILMN_3781	0.017452	0.000246	6.14154	0.70561	1.54548	IL32	interleukin 32
ILMN_25059	0.0309025	0.000549	5.45529	-0.14263	1.54529	HMOX1	heme oxygenase 1
ILMN_23320	0.118454	0.00408	3.93582	-2.26286	1.54004	NKX2-2	NK2 homeobox 2
ILMN_14011	0.130248	0.00485	3.8166	-2.44281	1.53449	VNN1	vanin 1
ILMN_25294	0.249255	0.0175	2.96377	-3.77122	1.52826	PODNL1	podocan like 1
ILMN_9884	0.0862666	0.00256	4.2689	-1.7699	1.52653	MAOB	monoamine oxidase B
ILMN_6017	0.0194317	0.000286	6.00946	0.54747	1.51901	KLK12	kallikrein related peptidase 12
ILMN_28294	0.112737	0.00376	3.99353	-2.17639	1.51293	NAT8	N-acetyltransferase 8 (putative)
ILMN_17181	0.0050829	4.39e-05	7.81961	2.52128	1.5117	CRYL1	crystallin lambda 1
ILMN_15995	0.228541	0.0145	3.08442	-3.58017	1.51079	CD160	CD160 molecule
ILMN_1034	0.0202323	0.000305	5.95416	0.48054	1.50491	SERPINA1	serpin family A member 1
ILMN_25741	0.0394598	0.000765	5.18559	-0.49445	1.49987	TNNC2	troponin C2, fast skeletal type
ILMN_18051	0.0913	0.00278	4.20709	-1.86025	1.49182	ASCL2	achaete-scute family bHLH transcription factor 2
ILMN_634	0.0212839	0.000332	5.87986	0.38996	1.4879	PAX6	paired box 6
ILMN_11046	0.0754186	0.00213	4.40204	-1.5771	1.48518	CALML4	calmodulin like 4
ILMN_18297	0.264126	0.0202	2.87233	-3.91628	1.48266	CD55	CD55 molecule (Cromer blood group)
ILMN_20864	0.0238476	0.00038	5.76359	0.24666	0.940502	EVA1A	eva-1 homolog A, regulator of programmed cell death
ILMN_20371	0.0672553	0.00177	4.53951	-1.38066	1.4806
ILMN_3785	0.00490985	4.2e-05	7.86861	2.56936	1.48037	ATP1B3	ATPase Na+/K+ transporting subunit beta 3
ILMN_10698	0.00231625	1.55e-05	8.9917	3.60403	1.48006	GALM	galactose mutarotase
ILMN_24002	0.0257653	0.000416	-5.68677	0.15093	-0.859044	MTMR2	myotubularin related protein 2
ILMN_4093	0.0580635	0.00139	4.72129	-1.12512	1.47408	LRRC75A	leucine rich repeat containing 75A
ILMN_25073	0.0258391	0.00042	-5.67739	0.13917	-0.996693	MICALL1	MICAL like 1
ILMN_26094	0.0241027	0.000386	5.74933	0.22895	1.47114	CYP2J2	cytochrome P450 family 2 subfamily J member 2
ILMN_436	0.0258391	0.000423	-5.67298	0.13365	-0.879047	MITF	melanogenesis associated transcription factor
ILMN_6967	0.0163642	0.000224	6.22585	0.80532	1.45823	AGPAT2	1-acylglycerol-3-phosphate O-acyltransferase 2
ILMN_2718	0.0121947	0.000151	6.58778	1.22258	1.45813	GLS	glutaminase
ILMN_677	0.0260106	0.000428	5.66189	0.11974	0.973662	ATP1A1	ATPase Na+/K+ transporting subunit alpha 1
ILMN_137281	0.0270417	0.000447	5.62666	0.07544	0.881606	ARL4A	ADP ribosylation factor like GTPase 4A
ILMN_23173	0.0455712	0.000977	4.99163	-0.75405	1.45067	LRRC66	leucine rich repeat containing 66
ILMN_3421	0.00296477	2.13e-05	8.6206	3.27579	1.45001	MAP1LC3A	microtubule associated protein 1 light chain 3 alpha
ILMN_12933	0.0278578	0.000467	5.58936	0.02832	1.44959	F12	coagulation factor XII
ILMN_19861	0.224881	0.014	3.10937	-3.54074	1.4494	FGL2	fibrinogen like 2
ILMN_11659	0.109872	0.00361	4.02312	-2.13223	1.44884	CDHR2	cadherin related family member 2
ILMN_137246	0.357439	0.0403	2.43195	-4.61283	1.44789	HOXB7	homeobox B7
ILMN_22616	0.0397657	0.000776	5.17343	-0.51056	1.44429	SLC5A9	solute carrier family 5 member 9
ILMN_24291	0.027887	0.000472	5.58102	0.01777	0.918243	DENND5B	DENN domain containing 5B
ILMN_20318	0.027887	0.000473	-5.57895	0.01514	-0.87317	MAP3K6	mitogen-activated protein kinase kinase kinase 6
ILMN_3169	0.343345	0.0362	2.49948	-4.50668	1.44202	GUCA2B	guanylate cyclase activator 2B
ILMN_27565	0.00496293	4.27e-05	7.85107	2.55218	1.43491	VIPR1	vasoactive intestinal peptide receptor 1
ILMN_22521	0.0191587	0.00028	6.02771	0.56946	1.43248	ANTXR2	anthrax toxin receptor 2
ILMN_30224	0.00912173	0.0001	6.98044	1.65625	1.43244	FREM1	FRAS1 related extracellular matrix 1
ILMN_11347	0.0109519	0.000131	6.7229	1.374	1.42389	PECR	peroxisomal trans-2-enoyl-CoA reductase
ILMN_7320	0.0038579	3.09e-05	8.20093	2.88863	1.42241	SLC17A4	solute carrier family 17 member 4
ILMN_5409	0.0294839	0.00051	-5.51601	-0.06489	-0.978696	LYPD6B	LY6/PLAUR domain containing 6B
ILMN_19426	0.139691	0.00567	3.7099	-2.60529	1.41971	PRSS3	protease, serine 3
ILMN_14241	0.0617982	0.00152	4.65	-1.22477	1.41661
ILMN_24349	0.136226	0.00539	3.74378	-2.55355	1.41609	AQP1	aquaporin 1 (Colton blood group)
ILMN_15429	0.00416289	3.48e-05	8.07174	2.76588	1.41209	TRHDE	thyrotropin releasing hormone degrading enzyme
ILMN_5597	0.0303047	0.000531	-5.48169	-0.10876	-0.917469	STOX2	storkhead box 2
ILMN_1421	0.0455712	0.000983	4.98717	-0.76009	1.40345	SLC9A3R1	SLC9A3 regulator 1
ILMN_4128	0.00528231	4.6e-05	7.77218	2.47451	1.39809	HEBP1	heme binding protein 1
ILMN_20024	0.14194	0.00585	3.68846	-2.6381	1.39081	ACAA2	acetyl-CoA acyltransferase 2
ILMN_26226	0.0161739	0.000221	6.23984	0.82177	1.38509	BST1	bone marrow stromal cell antigen 1
ILMN_22156	0.0326093	0.000589	5.39666	-0.21822	1.38351	B4GALT6	beta-1,4-galactosyltransferase 6
ILMN_8091	0.0708027	0.00194	4.47184	-1.47702	1.38245	CELF3	CUGBP, Elav-like family member 3
ILMN_1356	0.0578637	0.00137	4.73173	-1.11059	1.37531	KLHL13	kelch like family member 13
ILMN_3326	0.310218	0.0283	2.65599	-4.25943	1.37352	SLC23A1	solute carrier family 23 member 1
ILMN_11335	0.0313672	0.000564	5.43296	-0.17136	0.915733	ASIC5	acid sensing ion channel subunit family member 5
ILMN_4468	0.0316187	0.00057	5.42417	-0.18268	0.902404	KIAA2013	KIAA2013
ILMN_10965	0.262497	0.0198	2.88301	-3.89933	1.37336	RARRES1	retinoic acid receptor responder 1
ILMN_15658	0.0327561	0.000595	5.38817	-0.22919	0.872983	BRE	brain and reproductive organ-expressed (TNFRSF1A modulator)
ILMN_405	0.329233	0.0329	2.55999	-4.41127	1.37333	XRCC4	X-ray repair cross complementing 4
ILMN_11044	0.0327561	0.000597	-5.3864	-0.23148	-0.922086	FAM53A	family with sequence similarity 53 member A
ILMN_24467	0.00851862	8.85e-05	7.10118	1.78576	1.37273	AGMAT	agmatinase
ILMN_1946	0.070666	0.00192	4.47986	-1.46556	1.3708	SERPINE2	serpin family E member 2
ILMN_5238	0.0108618	0.000129	6.73851	1.39134	1.3686	CRYBA2	crystallin beta A2
ILMN_5440	0.010293	0.000117	6.82578	1.48773	1.36857	DUSP6	dual specificity phosphatase 6
ILMN_24125	0.155005	0.0068	3.5856	-2.79619	1.36363	CA1	carbonic anhydrase 1
ILMN_10779	0.183919	0.00935	3.37251	-3.12709	1.36263	CIDEC	cell death inducing DFFA like effector c
ILMN_10969	0.0202323	0.000304	5.95492	0.48146	1.36176	CASP1	caspase 1
ILMN_1571	0.0341992	0.000636	-5.33401	-0.29953	-0.995134	TRIB2	tribbles pseudokinase 2
ILMN_8174	0.0153359	0.000203	6.3171	0.91214	1.35647	IL22RA1	interleukin 22 receptor subunit alpha 1
ILMN_20158	0.0599539	0.00146	4.68334	-1.17807	1.35643	TRIM10	tripartite motif containing 10
ILMN_13538	0.0359489	0.000674	5.2872	-0.36065	0.883229	NUAK2	NUAK family kinase 2
ILMN_13313	0.00715107	7.05e-05	7.32894	2.02535	1.35387	GIPC2	GIPC PDZ domain containing family member 2
ILMN_3641	0.0362372	0.000683	5.27656	-0.37459	0.841717	PUS10	pseudouridylate synthase 10
ILMN_25425	0.043139	0.000888	5.0664	-0.65332	1.34632	ACAD11	acyl-CoA dehydrogenase family member 11
ILMN_17343	0.0369559	0.0007	-5.25656	-0.40084	-0.804017	MKI67	marker of proliferation Ki-67
ILMN_6614	0.0373665	0.00071	5.24559	-0.41526	0.916609	ASIC2	acid sensing ion channel subunit 2
ILMN_5694	0.229113	0.0146	3.0798	-3.58748	1.34357	PMP22	peripheral myelin protein 22
ILMN_6867	0.0216579	0.000341	5.85678	0.36166	1.34178	SULT1E1	sulfotransferase family 1E member 1
ILMN_23297	0.0394598	0.000757	-5.19366	-0.48377	-0.864621	SUFU	SUFU negative regulator of hedgehog signaling
ILMN_1038	0.238312	0.0159	3.02581	-3.67292	1.3348	LMX1A	LIM homeobox transcription factor 1 alpha
ILMN_17730	0.0394598	0.000762	-5.1889	-0.49006	-0.773824	DUSP4	dual specificity phosphatase 4
ILMN_15911	0.160216	0.00721	3.54678	-2.85616	1.32782	DNAJC12	DnaJ heat shock protein family (Hsp40) member C12
ILMN_19665	0.0415615	0.00083	5.12053	-0.5809	1.32662	CES2	carboxylesterase 2
ILMN_30009	0.0363873	0.000687	5.27114	-0.38169	1.32602	PLIN2	perilipin 2
ILMN_26359	0.0405778	0.000798	5.15137	-0.53985	1.32513	PDSS1	prenyl (decaprenyl) diphosphate synthase, subunit 1
ILMN_1809	0.0397657	0.000776	-5.17354	-0.51041	-0.844233	PHKG2	phosphorylase kinase catalytic subunit gamma 2
ILMN_12235	0.027887	0.000471	5.58274	0.01994	1.32119	ABAT	4-aminobutyrate aminotransferase
ILMN_28254	0.0170004	0.000235	6.18216	0.75377	1.32057	TTLL6	tubulin tyrosine ligase like 6
ILMN_4761	0.0336625	0.000618	5.35759	-0.26885	1.3171	SULT1A3	sulfotransferase family 1A member 3
ILMN_29787	0.0849137	0.0025	4.2839	-1.74805	1.31689
ILMN_30321	0.16138	0.0073	3.53828	-2.8693	1.31291	C1orf115	chromosome 1 open reading frame 115
ILMN_18786	0.0410376	0.000813	-5.13715	-0.55876	-0.984123	GNAZ	G protein subunit alpha z
ILMN_4070	0.00552865	4.97e-05	7.68996	2.39285	1.31227	EPCAM	epithelial cell adhesion molecule
ILMN_2667	0.00926927	0.000103	6.95623	1.63006	1.31059	LUZP1	leucine zipper protein 1
ILMN_21972	0.208758	0.0122	3.19752	-3.40166	1.30459	GATM	glycine amidinotransferase
ILMN_19429	0.0174014	0.000244	6.15139	0.7173	1.30317	KLK1	kallikrein 1
ILMN_22014	0.0672553	0.00177	4.53999	-1.37998	1.30268	CD36	CD36 molecule
ILMN_3786	0.0416427	0.000835	5.11521	-0.588	0.967398	MDK	midkine (neurite growth-promoting factor 2)
ILMN_1850	0.228142	0.0143	3.09155	-3.5689	1.30128	DAZAP1	DAZ associated protein 1
ILMN_21932	0.0420086	0.000847	5.10444	-0.60238	0.774866	TMEM117	transmembrane protein 117
ILMN_15297	0.00871959	9.29e-05	7.0536	1.73493	1.30051	PDK3	pyruvate dehydrogenase kinase 3
ILMN_1263	0.0403798	0.000792	5.15723	-0.53205	1.30042	TMEM25	transmembrane protein 25
ILMN_9639	0.0188561	0.000274	6.0476	0.59337	1.29938	PAPSS2	3'-phosphoadenosine 5'-phosphosulfate synthase 2
ILMN_13495	0.244011	0.0168	2.98921	-3.73089	1.29891	TTBK1	tau tubulin kinase 1
ILMN_14243	0.0421627	0.00086	-5.09206	-0.61894	-0.799019	WDFY2	WD repeat and FYVE domain containing 2
ILMN_6786	0.0426132	0.000872	5.08091	-0.63386	0.887224	GJC2	gap junction protein gamma 2
ILMN_3217	0.0309025	0.000549	5.4542	-0.14403	1.29789
ILMN_2218	0.0441158	0.000921	5.03776	-0.69181	1.28981	ZNF462	zinc finger protein 462
ILMN_23691	0.0751939	0.00211	4.40691	-1.57009	1.28959	KDM8	lysine demethylase 8
ILMN_12260	0.0433045	0.000896	5.05974	-0.66226	1.28127	SKAP2	src kinase associated phosphoprotein 2
ILMN_23573	0.0225116	0.000355	5.82084	0.31746	1.28102	GDA	guanine deaminase
ILMN_21483	0.0435399	0.000904	-5.05238	-0.67214	-0.786858	EPB41L1	erythrocyte membrane protein band 4.1 like 1
ILMN_5114	0.273888	0.0218	2.82316	-3.99432	1.27794	NTRK1	neurotrophic receptor tyrosine kinase 1
ILMN_9420	0.0438865	0.000914	-5.04369	-0.68383	-0.926247	BAG3	BCL2 associated athanogene 3
ILMN_26470	0.0945618	0.00294	4.16772	-1.91807	1.27524	F2RL1	F2R like trypsin receptor 1
ILMN_137077	0.0291466	0.000501	5.53025	-0.04673	1.27451
ILMN_24990	0.043139	0.00089	5.06461	-0.65572	1.27073	TMEM176A	transmembrane protein 176A
ILMN_4650	0.312613	0.0291	2.63717	-4.28925	1.27035	SMOC2	SPARC related modular calcium binding 2
ILMN_3111	0.0672553	0.00176	4.54315	-1.3755	1.26996	GPR35	G protein-coupled receptor 35
ILMN_2146	0.147966	0.00622	3.64665	-2.70223	1.26885	AMPD1	adenosine monophosphate deaminase 1
ILMN_29351	0.0750569	0.0021	4.4126	-1.56192	1.26687	EDAR	ectodysplasin A receptor
ILMN_28642	0.00971909	0.000108	6.90599	1.5755	1.26559	CNDP1	carnosine dipeptidase 1
ILMN_18957	0.0257653	0.000417	5.68499	0.1487	1.26537	B3GNT5	UDP-GlcNAc:betaGal beta-1,3-N-acetylglucosaminyltransferase 5
ILMN_16687	0.0455712	0.000978	4.99131	-0.75448	0.947648	PEBP1	phosphatidylethanolamine binding protein 1
ILMN_10032	0.384906	0.0483	2.31683	-4.79265	1.2633	PNLIPRP1	pancreatic lipase related protein 1
ILMN_18269	0.0742566	0.00205	4.42885	-1.53858	1.26269	ETHE1	ETHE1, persulfide dioxygenase
ILMN_28362	0.0455712	0.000981	-4.98883	-0.75784	-0.881707	WWC3	WWC family member 3
ILMN_28975	0.197331	0.0109	3.27151	-3.2853	1.26119	NMU	neuromedin U
ILMN_12508	0.0455712	0.000985	-4.98553	-0.7623	-0.837523	ARHGAP33	Rho GTPase activating protein 33
ILMN_4835	0.310218	0.0283	2.65595	-4.25951	1.25694	SUCNR1	succinate receptor 1
ILMN_26692	0.0543338	0.00126	4.79238	-1.0265	1.25503	MGAM	maltase-glucoamylase
ILMN_2677	0.185561	0.00952	3.36059	-3.14571	1.25039	UGT1A8	UDP glucuronosyltransferase family 1 member A8
ILMN_3911	0.0462875	0.00101	4.96797	-0.7861	0.807217	PLCB3	phospholipase C beta 3
ILMN_26632	0.196779	0.0108	3.27567	-3.27876	1.24991	SLC1A7	solute carrier family 1 member 7
ILMN_11664	0.0466515	0.00102	4.95745	-0.80037	0.801029	HPS5	HPS5, biogenesis of lysosomal organelles complex 2 subunit 2
ILMN_15541	0.0466515	0.00102	-4.95665	-0.80146	-0.751279	HOXC4	homeobox C4
ILMN_10152	0.0475575	0.00104	4.93995	-0.82416	0.901763	DHRS4	dehydrogenase/reductase 4
ILMN_18729	0.0477549	0.00105	4.93501	-0.83088	0.959905	ANKRD9	ankyrin repeat domain 9
ILMN_22491	0.0478773	0.00106	4.93104	-0.83629	0.854066	MOB3B	MOB kinase activator 3B
ILMN_1394	0.0509306	0.00116	4.85992	-0.93349	1.24782	MAN1A1	mannosidase alpha class 1A member 1
ILMN_8363	0.0479248	0.00106	4.92711	-0.84163	0.786853	ESPL1	extra spindle pole bodies like 1, separase
ILMN_19261	0.047933	0.00107	4.92382	-0.84612	0.978737	SLC39A4	solute carrier family 39 member 4
ILMN_27050	0.176596	0.00849	3.43724	-3.02613	1.24764	SLC29A4	solute carrier family 29 member 4
ILMN_7397	0.0124528	0.000156	6.55517	1.18569	1.24322	SPON1	spondin 1
ILMN_17379	0.0521586	0.0012	4.83015	-0.97441	1.24171	LIPA	lipase A, lysosomal acid type
ILMN_17285	0.317988	0.0304	2.6091	-4.33367	1.2368	CCL24	C-C motif chemokine ligand 24
ILMN_18916	0.049268	0.00111	4.89554	-0.88472	0.880978	DHRS4L2	dehydrogenase/reductase 4 like 2
ILMN_6034	0.0206058	0.000315	5.9243	0.44423	1.23352	FEV	FEV, ETS transcription factor
ILMN_9791	0.223376	0.0137	3.12044	-3.52324	1.23072	ANKS4B	ankyrin repeat and sterile alpha motif domain containing 4B
ILMN_6029	0.0295896	0.000513	5.5107	-0.07166	1.22791	ACSL5	acyl-CoA synthetase long-chain family member 5
ILMN_11882	0.0503912	0.00114	-4.87144	-0.91769	-0.795827	SLC25A19	solute carrier family 25 member 19
ILMN_3745	0.050422	0.00114	4.86932	-0.92061	0.965188	CROT	carnitine O-octanoyltransferase
ILMN_28888	0.325607	0.0321	2.57585	-4.38622	1.2253	TPSAB1	tryptase alpha/beta 1
ILMN_7859	0.0639793	0.00162	4.60357	-1.29006	1.22322	PID1	phosphotyrosine interaction domain containing 1
ILMN_24588	0.0512181	0.00117	4.85183	-0.94461	0.740884	GALNT1	polypeptide N-acetylgalactosaminyltransferase 1
ILMN_1260	0.0512181	0.00117	4.85066	-0.94621	0.766445	WNT3	Wnt family member 3
ILMN_23877	0.0513596	0.00118	-4.8469	-0.95137	-0.83981	HK1	hexokinase 1
ILMN_9607	0.0435399	0.000905	5.05177	-0.67296	1.21837	SEC14L2	SEC14 like lipid binding 2
ILMN_25318	0.0258391	0.000421	5.67717	0.13891	1.20862	CA13	carbonic anhydrase 13
ILMN_26211	0.0056302	5.09e-05	7.66521	2.36813	1.20787	NLRP6	NLR family pyrin domain containing 6
ILMN_11788	0.0523814	0.00121	-4.82526	-0.98114	-0.919571	TFR2	transferrin receptor 2
ILMN_11155	0.133758	0.00515	3.77589	-2.50464	1.20706	C4orf3	chromosome 4 open reading frame 3
ILMN_23712	0.0542775	0.00126	-4.79477	-1.0232	-0.735967	ICE2	interactor of little elongation complex ELL subunit 2
ILMN_17574	0.109256	0.00358	4.02905	-2.1234	1.20644	TNFRSF17	TNF receptor superfamily member 17
ILMN_29619	0.141588	0.00578	3.6958	-2.62686	1.20115	SLC39A8	solute carrier family 39 member 8
ILMN_21010	0.0547624	0.00128	4.78221	-1.04057	0.900988	FAM135A	family with sequence similarity 135 member A
ILMN_5426	0.0547624	0.00128	-4.78159	-1.04142	-0.881289	LAMA2	laminin subunit alpha 2
ILMN_8839	0.0558247	0.00131	-4.76534	-1.06393	-0.910933	SOCS4	suppressor of cytokine signaling 4
ILMN_1772	0.0304384	0.000535	5.47576	-0.11636	1.1995	BMP6	bone morphogenetic protein 6
ILMN_17023	0.17042	0.00803	3.47418	-2.96868	1.19906	C8A	complement component 8 alpha subunit
ILMN_20440	0.0567219	0.00134	4.74846	-1.08734	0.826881	ANGPTL4	angiopoietin like 4
ILMN_20060	0.170316	0.00801	3.47552	-2.96661	1.19887	ABCG5	ATP binding cassette subfamily G member 5
ILMN_16484	0.0579742	0.00137	4.72872	-1.11478	0.725174	LRRC8D	leucine rich repeat containing 8 family member D
ILMN_8935	0.194085	0.0105	3.29531	-3.24795	1.19504	ACE	angiotensin I converting enzyme
ILMN_3634	0.179265	0.00869	3.42104	-3.05136	1.19064	SOAT2	sterol O-acyltransferase 2
ILMN_2450	0.0580635	0.00139	4.72145	-1.12491	0.79438	MPST	mercaptopyruvate sulfurtransferase
ILMN_24839	0.153425	0.00668	3.59829	-2.77663	1.18051	PKDCC	protein kinase domain containing, cytoplasmic
ILMN_9170	0.0580635	0.00139	-4.71981	-1.12718	-0.910535	CDK5RAP3	CDK5 regulatory subunit associated protein 3
ILMN_20684	0.0149491	0.000195	6.35043	0.95089	1.1804	TSPAN7	tetraspanin 7
ILMN_138827	0.0585601	0.00141	4.71028	-1.14047	0.871764	CDCA7	cell division cycle associated 7
ILMN_17459	0.282358	0.023	2.78887	-4.04873	1.17984	GNLY	granulysin
ILMN_16272	0.332451	0.0337	2.54525	-4.43454	1.17676	CELA2B	chymotrypsin like elastase family member 2B
ILMN_24582	0.0593643	0.00144	-4.69503	-1.16175	-0.756829	ARHGAP10	Rho GTPase activating protein 10
ILMN_139237	0.0410376	0.000815	5.13457	-0.56219	1.16981	MGAT4A	mannosyl (alpha-1,3-)-glycoprotein beta-1,4-N-acetylglucosaminyltransferase, isozyme A
ILMN_18789	0.251153	0.0178	2.95266	-3.78884	1.16898	ASS1	argininosuccinate synthase 1
ILMN_24336	0.0149892	0.000197	6.3446	0.94413	1.16645	STRADB	STE20-related kinase adaptor beta
ILMN_24762	0.0120536	0.000148	6.60632	1.2435	1.15941	UNC5D	unc-5 netrin receptor D
ILMN_7001	0.0600859	0.00147	-4.67867	-1.18461	-0.927225	SH3TC1	SH3 domain and tetratricopeptide repeats 1
ILMN_8650	0.060316	0.00148	-4.67362	-1.19168	-0.874896	PIP4K2C	phosphatidylinositol-5-phosphate 4-kinase type 2 gamma
ILMN_2353	0.0687935	0.00183	4.5118	-1.42004	1.15432	ATP2C2	ATPase secretory pathway Ca2+ transporting 2
ILMN_24608	0.114739	0.00387	3.97288	-2.20729	1.15389	BDKRB1	bradykinin receptor B1
ILMN_139251	0.292863	0.0245	2.7469	-4.11533	1.1508	SH3BP1	SH3 domain binding protein 1
ILMN_23566	0.312613	0.0292	2.63637	-4.29051	1.15012
ILMN_7170	0.0333955	0.00061	5.3679	-0.25547	1.14922	EFHC2	EF-hand domain containing 2
ILMN_29885	0.0621305	0.00154	-4.643	-1.23459	-0.850005	CDC42BPA	CDC42 binding protein kinase alpha
ILMN_13621	0.128754	0.0047	3.83793	-2.41048	1.14896	SEC23A	Sec23 homolog A, coat complex II component
ILMN_15378	0.0623516	0.00155	4.63594	-1.2445	0.890026	RGS4	regulator of G-protein signaling 4
ILMN_13393	0.0623516	0.00155	-4.63592	-1.24454	-0.872216	MTFP1	mitochondrial fission process 1
ILMN_6250	0.0625444	0.00156	4.63213	-1.24986	0.962483
ILMN_13775	0.0625451	0.00156	4.63066	-1.25193	0.782952	KIFAP3	kinesin associated protein 3
ILMN_27355	0.0629541	0.00158	4.62431	-1.26086	0.826487	PHF13	PHD finger protein 13
ILMN_17137	0.0278221	0.000463	5.59541	0.03599	1.14543	TRIM6-TRIM34	TRIM6-TRIM34 readthrough
ILMN_139066	0.0150448	0.000198	6.33787	0.93631	1.14281	SLC25A15	solute carrier family 25 member 15
ILMN_7771	0.0638378	0.00161	4.60823	-1.2835	0.97001	VDR	vitamin D (1,25- dihydroxyvitamin D3) receptor
ILMN_18576	0.192047	0.0103	3.30822	-3.22771	1.14107	DNAJC12	DnaJ heat shock protein family (Hsp40) member C12
ILMN_7276	0.317643	0.0303	2.6121	-4.32891	1.14063	DFNA5	DFNA5, deafness associated tumor suppressor
ILMN_24967	0.00826729	8.55e-05	7.13546	1.82222	1.14012	SLC28A1	solute carrier family 28 member 1
ILMN_30048	0.0641578	0.00163	4.59999	-1.29511	0.796927	C9orf40	chromosome 9 open reading frame 40
ILMN_2145	0.185561	0.00953	3.36031	-3.14615	1.13878	UGT1A7	UDP glucuronosyltransferase family 1 member A7
ILMN_22073	0.0642332	0.00164	4.59625	-1.30039	0.82297	MEST	mesoderm specific transcript
ILMN_21467	0.0646101	0.00165	4.59044	-1.30858	0.887595
ILMN_28018	0.0646344	0.00165	-4.58874	-1.31098	-0.793829	FGD4	FYVE, RhoGEF and PH domain containing 4
ILMN_19308	0.0655033	0.00168	-4.57734	-1.32709	-0.737652	FRMD5	FERM domain containing 5
ILMN_13395	0.0657653	0.00169	4.57123	-1.33573	0.872569	DAP3	death associated protein 3
ILMN_15386	0.0657653	0.00169	4.57112	-1.33589	0.86436	ANO10	anoctamin 10
ILMN_22762	0.0657653	0.0017	-4.57012	-1.3373	-0.794145	MRPL27	mitochondrial ribosomal protein L27
ILMN_7249	0.0685757	0.00181	4.52048	-1.4077	1.13807	TINAG	tubulointerstitial nephritis antigen
ILMN_15875	0.0415615	0.000828	5.12243	-0.57837	1.13737	MYB	MYB proto-oncogene, transcription factor
ILMN_21121	0.0669252	0.00174	4.55288	-1.36171	0.791664	YBEY	ybeY metallopeptidase (putative)
ILMN_20454	0.0670957	0.00174	4.54959	-1.36638	0.812274	SSPN	sarcospan
ILMN_16246	0.0671764	0.00175	4.5473	-1.36962	0.984639	SULT2B1	sulfotransferase family 2B member 1
ILMN_3166	0.0672383	0.00175	4.54522	-1.37256	0.754425	SFXN3	sideroflexin 3
ILMN_23783	0.0283401	0.000483	5.56071	-0.00798	1.13315	GOLT1A	golgi transport 1A
ILMN_138917	0.0821078	0.00238	4.32155	-1.69336	1.13207	GALC	galactosylceramidase
ILMN_13419	0.0214369	0.000336	5.86838	0.3759	1.13133	ELOVL7	ELOVL fatty acid elongase 7
ILMN_16957	0.0824756	0.0024	4.31586	-1.7016	1.13116	RNF125	ring finger protein 125
ILMN_137856	0.131542	0.00498	3.7979	-2.47119	1.12839	PDXP	pyridoxal phosphatase
ILMN_10603	0.067727	0.00179	-4.53157	-1.39194	-0.927171	ALDH4A1	aldehyde dehydrogenase 4 family member A1
ILMN_24855	0.175557	0.00837	3.44612	-3.0123	1.12813	CLDN1	claudin 1
ILMN_21293	0.0512181	0.00117	4.85305	-0.94292	1.12781	ETS2	ETS proto-oncogene 2, transcription factor
ILMN_5207	0.0685757	0.00182	4.51822	-1.41091	0.859069	GNG2	G protein subunit gamma 2
ILMN_17834	0.0196765	0.000291	5.99272	0.52725	1.12708	TFPI	tissue factor pathway inhibitor
ILMN_15502	0.101714	0.00325	4.09665	-2.02298	1.12132	S100A10	S100 calcium binding protein A10
ILMN_22384	0.127721	0.00463	3.84889	-2.3939	1.12079	SLC36A1	solute carrier family 36 member 1
ILMN_17939	0.170316	0.008	3.47674	-2.96471	1.11979	UGT1A10	UDP glucuronosyltransferase family 1 member A10
ILMN_7905	0.0180669	0.000257	6.10331	0.66008	1.11461	SLC16A4	solute carrier family 16 member 4
ILMN_14361	0.0689191	0.00185	4.5064	-1.42772	0.908906	B3GALT2	beta-1,3-galactosyltransferase 2
ILMN_2490	0.0146371	0.000191	6.37307	0.97712	1.11383
ILMN_24201	0.0868534	0.00258	4.26282	-1.77876	1.11329	TRIM54	tripartite motif containing 54
ILMN_22644	0.0702991	0.00189	4.4877	-1.45438	0.79257	MYO1D	myosin ID
ILMN_14872	0.11684	0.00399	3.9522	-2.23827	1.10448	KRT72	keratin 72
ILMN_23976	0.0415615	0.000832	5.11869	-0.58337	1.1043	CTSZ	cathepsin Z
ILMN_9690	0.276304	0.022	2.81468	-4.00776	1.10392	SLC37A2	solute carrier family 37 member 2
ILMN_21717	0.230016	0.0148	3.07283	-3.59849	1.10275	MS4A4A	membrane spanning 4-domains A4A
ILMN_8210	0.0708027	0.00193	-4.47416	-1.47371	-0.735722	OR52N2	olfactory receptor family 52 subfamily N member 2
ILMN_16602	0.0708027	0.00193	4.47366	-1.47442	0.876981	TDO2	tryptophan 2,3-dioxygenase
ILMN_4138	0.0708027	0.00193	4.47299	-1.47538	0.70557	FAM84A	family with sequence similarity 84 member A
ILMN_25978	0.339605	0.0351	2.51946	-4.4752	1.10262	C9	complement component 9
ILMN_8856	0.0712902	0.00195	-4.46546	-1.48614	-0.698062	FGF18	fibroblast growth factor 18
ILMN_11901	0.0726892	0.00199	-4.44982	-1.50852	-0.86551	ADGRL2	adhesion G protein-coupled receptor L2
ILMN_635	0.286759	0.0237	2.76977	-4.07905	1.10091	KRT81	keratin 81
ILMN_14931	0.0739852	0.00204	-4.43327	-1.53224	-0.831703	DSTN	destrin, actin depolymerizing factor
ILMN_4642	0.0739852	0.00204	4.43291	-1.53275	0.716323	ABCB10	ATP binding cassette subfamily B member 10
ILMN_29011	0.131997	0.00503	3.79214	-2.47994	1.10025	TBX10	T-box 10
ILMN_9542	0.361191	0.0416	2.41058	-4.64632	1.09992	ENPP7	ectonucleotide pyrophosphatase/phosphodiesterase 7
ILMN_18124	0.146299	0.0061	3.65908	-2.68314	1.09982	C2orf82	chromosome 2 open reading frame 82
ILMN_3398	0.0742575	0.00207	4.42369	-1.54598	0.938923	PROS1	protein S (alpha)
ILMN_11200	0.0307228	0.000542	5.4658	-0.12913	1.09855	SRI	sorcin
ILMN_10812	0.0742575	0.00207	-4.42248	-1.54772	-0.751769	OR13J1	olfactory receptor family 13 subfamily J member 1
ILMN_19600	0.042147	0.000853	5.09878	-0.60995	1.09727	DACH1	dachshund family transcription factor 1
ILMN_27173	0.0160903	0.000217	6.25391	0.83828	1.09682	PON2	paraoxonase 2
ILMN_3860	0.0751348	0.00211	4.41003	-1.56561	0.873317
ILMN_24454	0.0751729	0.00211	4.40838	-1.56797	0.97914	SLC37A4	solute carrier family 37 member 4
ILMN_9206	0.0898798	0.0027	4.2306	-1.82582	1.09635	CRYM	crystallin mu
ILMN_7804	0.0752464	0.00212	-4.40513	-1.57264	-0.988181	ANKRD22	ankyrin repeat domain 22
ILMN_2811	0.312628	0.0294	2.63228	-4.29698	1.09527	ARHGAP4	Rho GTPase activating protein 4
ILMN_12448	0.0754186	0.00213	4.40093	-1.57869	0.71616	NUDT9	nudix hydrolase 9
ILMN_20492	0.0758804	0.00215	4.3952	-1.58694	0.723058	MON1A	MON1 homolog A, secretory trafficking associated
ILMN_10103	0.0761124	0.00216	4.39171	-1.59196	0.991223	CASR	calcium sensing receptor
ILMN_30044	0.0761845	0.00216	4.38976	-1.59477	0.69488	ACAA1	acetyl-CoA acyltransferase 1
ILMN_17839	0.0771522	0.0022	4.37928	-1.60988	0.872634	PLGRKT	plasminogen receptor with a C-terminal lysine
ILMN_21935	0.0776619	0.00221	4.37321	-1.61862	0.820709	ATP7B	ATPase copper transporting beta
ILMN_4979	0.0777725	0.00222	-4.37093	-1.62192	-0.778037	RAD21	RAD21 cohesin complex component
ILMN_7342	0.0104928	0.000123	6.77927	1.43648	1.08537	XPR1	xenotropic and polytropic retrovirus receptor 1
ILMN_22264	0.0708027	0.00193	4.4745	-1.47322	1.08394	INSM1	INSM transcriptional repressor 1
ILMN_20720	0.167614	0.00779	3.49417	-2.93765	1.08231	PEX11A	peroxisomal biogenesis factor 11 alpha
ILMN_402	0.0797047	0.00229	-4.34807	-1.65495	-0.653494	TRIP11	thyroid hormone receptor interactor 11
ILMN_23410	0.079726	0.0023	4.34665	-1.65701	0.659851	NDFIP2	Nedd4 family interacting protein 2
ILMN_2724	0.082083	0.00237	-4.32376	-1.69016	-0.777526	HPS1	HPS1, biogenesis of lysosomal organelles complex 3 subunit 1
ILMN_12706	0.0642332	0.00164	4.59672	-1.29972	1.08157	GDPD2	glycerophosphodiester phosphodiesterase domain containing 2
ILMN_12158	0.0210445	0.000324	5.90052	0.41522	1.07991	SPSB1	splA/ryanodine receptor domain and SOCS box containing 1
ILMN_3157	0.134521	0.00525	3.7625	-2.52502	1.07969	TBCB	tubulin folding cofactor B
ILMN_3095	0.127721	0.00464	3.84719	-2.39646	1.07865
ILMN_16682	0.083081	0.00242	-4.30756	-1.71365	-0.935767	SMAD6	SMAD family member 6
ILMN_7295	0.083081	0.00243	-4.30685	-1.71469	-0.707785	ADAMTSL3	ADAMTS like 3
ILMN_15424	0.083081	0.00243	4.30623	-1.71559	0.780773	SPAG4	sperm associated antigen 4
ILMN_11523	0.083081	0.00243	-4.30542	-1.71676	-0.768127	TTC13	tetratricopeptide repeat domain 13
ILMN_27534	0.083081	0.00243	-4.30451	-1.71809	-0.729913	CXorf57	chromosome X open reading frame 57
ILMN_8240	0.0837083	0.00246	-4.29785	-1.72776	-0.963447	UTS2R	urotensin 2 receptor
ILMN_17742	0.340606	0.0356	2.51072	-4.48899	1.07359	PSG9	pregnancy specific beta-1-glycoprotein 9
ILMN_5085	0.0848112	0.0025	4.28597	-1.74504	0.711856	PDE3B	phosphodiesterase 3B
ILMN_1735	0.354505	0.0388	2.45535	-4.5761	1.07087	ADIRF	adipogenesis regulatory factor
ILMN_18432	0.0854361	0.00252	4.27827	-1.75624	0.707798	IRS1	insulin receptor substrate 1
ILMN_3638	0.0857735	0.00254	-4.27423	-1.76213	-0.958156	SEMA3F	semaphorin 3F
ILMN_8117	0.0623516	0.00155	4.63873	-1.24059	1.07059	ABCD1	ATP binding cassette subfamily D member 1
ILMN_28359	0.318591	0.0306	2.60511	-4.33997	1.06814	CAMK1G	calcium/calmodulin dependent protein kinase IG
ILMN_17186	0.0874466	0.0026	4.25672	-1.78766	0.882994	CALML4	calmodulin like 4
ILMN_19790	0.0874918	0.0026	4.25517	-1.78992	0.653396	FAM35A	family with sequence similarity 35 member A
ILMN_29019	0.0883251	0.00263	4.24716	-1.80162	0.711087	RMND1	required for meiotic nuclear division 1 homolog
ILMN_438	0.0896546	0.00268	-4.23522	-1.81907	-0.692326	ABCC5	ATP binding cassette subfamily C member 5
ILMN_5763	0.0333955	0.000611	5.36625	-0.2576	1.06814	GNG12	G protein subunit gamma 12
ILMN_17135	0.0445934	0.000938	5.02383	-0.71057	1.066	FCGRT	Fc fragment of IgG receptor and transporter
ILMN_9813	0.0638378	0.00161	4.60805	-1.28375	1.06583	LRMP	lymphoid restricted membrane protein
ILMN_22518	0.0900194	0.00271	-4.22762	-1.83017	-0.854863	RECQL5	RecQ like helicase 5
ILMN_8759	0.018274	0.000262	6.08719	0.64082	1.06318	MGST2	microsomal glutathione S-transferase 2
ILMN_14127	0.236024	0.0155	3.04115	-3.64862	1.06218
ILMN_20063	0.0905024	0.00274	4.21948	-1.8421	0.943661	PLD1	phospholipase D1
ILMN_12749	0.0905024	0.00274	4.21907	-1.8427	0.782872	FCAMR	Fc fragment of IgA and IgM receptor
ILMN_137796	0.0905024	0.00274	-4.21799	-1.84428	-0.686783	ZNF626	zinc finger protein 626
ILMN_29202	0.0159631	0.000214	6.26784	0.85461	1.0619	HTR2B	5-hydroxytryptamine receptor 2B
ILMN_4227	0.0146371	0.00019	6.3761	0.98063	1.06034	PDE5A	phosphodiesterase 5A
ILMN_9004	0.0912628	0.00278	4.20853	-1.85814	0.642079	TMEM120A	transmembrane protein 120A
ILMN_4453	0.107513	0.00351	4.04145	-2.10494	1.05996	ARSE	arylsulfatase E (chondrodysplasia punctata 1)
ILMN_29352	0.0916393	0.0028	-4.2024	-1.86712	-0.666951	DMKN	dermokine
ILMN_12337	0.229113	0.0146	3.0801	-3.58701	1.05626	CPE	carboxypeptidase E
ILMN_11981	0.184071	0.00938	3.37074	-3.12986	1.05412	PSORS1C1	psoriasis susceptibility 1 candidate 1
ILMN_18847	0.0920945	0.00283	-4.19579	-1.87683	-0.785356	SH3RF2	SH3 domain containing ring finger 2
ILMN_28775	0.312628	0.0293	2.63376	-4.29464	1.05258	SLC10A2	solute carrier family 10 member 2
ILMN_137245	0.0926687	0.00286	-4.18878	-1.88711	-0.705496	BRAF	B-Raf proto-oncogene, serine/threonine kinase
ILMN_21212	0.0926687	0.00286	-4.18846	-1.88758	-0.848889	FAM43A	family with sequence similarity 43 member A
ILMN_16322	0.0934852	0.00289	4.18105	-1.89847	0.907282	ASB13	ankyrin repeat and SOCS box containing 13
ILMN_22132	0.0935839	0.0029	4.17917	-1.90123	0.923239	CTSO	cathepsin O
ILMN_515	0.0939136	0.00291	-4.17553	-1.90658	-0.689928	RFC2	replication factor C subunit 2
ILMN_13122	0.0945618	0.00294	4.16933	-1.9157	0.821492	FGD5	FYVE, RhoGEF and PH domain containing 5
ILMN_8507	0.0279181	0.000475	5.57563	0.01093	1.0488	ANO6	anoctamin 6
ILMN_10502	0.0945618	0.00294	4.16725	-1.91876	0.690861	SIAE	sialic acid acetylesterase
ILMN_15072	0.280557	0.0227	2.79717	-4.03555	1.04814	MAF	MAF bZIP transcription factor
ILMN_24724	0.0965695	0.00302	4.14873	-1.94604	0.996168	SLC4A4	solute carrier family 4 member 4
ILMN_24436	0.0455712	0.000989	4.9819	-0.76722	1.04573	LAPTM4B	lysosomal protein transmembrane 4 beta
ILMN_20547	0.0965695	0.00303	-4.1478	-1.94741	-0.863439	WDR91	WD repeat domain 91
ILMN_14281	0.097376	0.00306	-4.14076	-1.95779	-0.852477	NUSAP1	nucleolar and spindle associated protein 1
ILMN_28063	0.097455	0.00306	4.13878	-1.9607	0.814804	TMEM41A	transmembrane protein 41A
ILMN_20534	0.097455	0.00307	-4.13696	-1.9634	-0.928385	NUP210L	nucleoporin 210 like
ILMN_14199	0.097455	0.00307	4.13688	-1.96351	0.664467	MASP2	mannan binding lectin serine peptidase 2
ILMN_25990	0.0567219	0.00134	4.74967	-1.08566	1.04092	PPP1R1B	protein phosphatase 1 regulatory inhibitor subunit 1B
ILMN_26950	0.220555	0.0135	3.13035	-3.50759	1.0374	UBE2I	ubiquitin conjugating enzyme E2 I
ILMN_3987	0.262497	0.0198	2.88501	-3.89615	1.03725	F5	coagulation factor V
ILMN_18387	0.0994695	0.00315	4.11793	-1.9915	0.691153	STXBP6	syntaxin binding protein 6
ILMN_15077	0.100348	0.00319	-4.10989	-2.00338	-0.633956	LINC00905	long intergenic non-protein coding RNA 905
ILMN_4883	0.0172689	0.00024	6.16438	0.73272	1.03689	EPHB2	EPH receptor B2
ILMN_5744	0.101313	0.00323	-4.10071	-2.01697	-0.919871
ILMN_5316	0.133283	0.00509	3.78269	-2.49429	1.03566	MB	myoglobin
ILMN_1429	0.0662417	0.00171	4.56333	-1.34691	1.03284	TFPI	tissue factor pathway inhibitor
ILMN_22606	0.0687935	0.00183	4.51218	-1.4195	1.03236	GLRX	glutaredoxin
ILMN_14054	0.356379	0.0398	2.43986	-4.60041	1.03077	EMC7	ER membrane protein complex subunit 7
ILMN_9786	0.297219	0.0253	2.72801	-4.14529	1.03029	CDK12	cyclin dependent kinase 12
ILMN_27440	0.109872	0.00362	4.0204	-2.13629	1.02305	SLC40A1	solute carrier family 40 member 1
ILMN_21797	0.103558	0.00333	-4.07854	-2.04983	-0.732355	CD36	CD36 molecule
ILMN_12221	0.104188	0.00336	4.07317	-2.05779	0.981867	CFI	complement factor I
ILMN_12906	0.104379	0.00337	4.07062	-2.06158	0.802038
ILMN_19310	0.104379	0.00338	4.06923	-2.06364	0.879635	PCDHB13	protocadherin beta 13
ILMN_10425	0.266512	0.0204	2.8636	-3.93013	1.02189	TCERG1L	transcription elongation regulator 1 like
ILMN_26849	0.105205	0.00341	-4.06205	-2.07431	-0.643573	TRAPPC2L	trafficking protein particle complex 2 like
ILMN_2357	0.105888	0.00344	-4.05641	-2.08268	-0.69438	FOXA2	forkhead box A2
ILMN_10052	0.0394598	0.000763	5.18739	-0.49206	1.02045	RFX6	regulatory factor X6
ILMN_7425	0.105953	0.00345	-4.05387	-2.08646	-0.845309	SOX18	SRY-box 18
ILMN_19637	0.106913	0.00349	-4.04645	-2.0975	-0.755857	COL8A2	collagen type VIII alpha 2 chain
ILMN_136962	0.253755	0.0182	2.93768	-3.81259	1.01765
ILMN_14524	0.151746	0.00649	3.61796	-2.74634	1.01051	FAM83A	family with sequence similarity 83 member A
ILMN_4003	0.130248	0.00484	3.81789	-2.44084	1.00936	GSTM4	glutathione S-transferase mu 4
ILMN_28863	0.109872	0.00361	-4.0226	-2.13301	-0.592244	HARS	histidyl-tRNA synthetase
ILMN_3601	0.0824756	0.0024	4.31596	-1.70147	1.00895	SLC22A4	solute carrier family 22 member 4
ILMN_29567	0.109872	0.00362	-4.01997	-2.13693	-0.692629	EPN3	epsin 3
ILMN_11548	0.109872	0.00362	-4.01988	-2.13706	-0.856358	COL1A1	collagen type I alpha 1 chain
ILMN_14373	0.111275	0.00368	4.00992	-2.15193	0.83415	OVOL1	ovo like transcriptional repressor 1
ILMN_139250	0.11128	0.00368	4.00885	-2.15352	0.654284	CDCA7	cell division cycle associated 7
ILMN_17629	0.111343	0.00369	4.00741	-2.15566	0.873479	SAT2	spermidine/spermine N1-acetyltransferase family member 2
ILMN_7285	0.111493	0.0037	4.00544	-2.15861	0.959398	ZNF396	zinc finger protein 396
ILMN_28977	0.112625	0.00375	-3.99569	-2.17318	-0.596985	FILIP1L	filamin A interacting protein 1 like
ILMN_15373	0.0276802	0.00046	5.60215	0.0445	1.00736	SLC52A3	solute carrier family 52 member 3
ILMN_2517	0.112625	0.00375	3.99526	-2.17382	0.710745	SLFN11	schlafen family member 11
ILMN_14661	0.379911	0.047	2.33381	-4.76624	1.00194	G6PC	glucose-6-phosphatase catalytic subunit
ILMN_20048	0.113816	0.0038	-3.98582	-2.18792	-0.793831	DRAM1	DNA damage regulated autophagy modulator 1
ILMN_6919	0.114108	0.00382	-3.98301	-2.19213	-0.844715	SPRN	shadow of prion protein homolog (zebrafish)
ILMN_8526	0.114162	0.00383	3.98166	-2.19415	0.66274	CHDH	choline dehydrogenase
ILMN_27838	0.114288	0.00384	3.97956	-2.19729	0.635741	RAB30	RAB30, member RAS oncogene family
ILMN_20590	0.114288	0.00384	-3.97885	-2.19835	-0.709464	CD72	CD72 molecule
ILMN_3521	0.114294	0.00385	-3.9778	-2.19992	-0.61714	WLS	wntless Wnt ligand secretion mediator
ILMN_24810	0.12523	0.00446	3.87394	-2.35604	1.00159	ANO3	anoctamin 3
ILMN_30277	0.0410376	0.000814	5.13619	-0.56004	1.00148	USH1C	USH1 protein network component harmonin
ILMN_137981	0.136226	0.00541	3.74201	-2.55625	1.00127	CD8B	CD8b molecule
ILMN_15380	0.116558	0.00395	3.95933	-2.22759	0.707742	OGG1	8-oxoguanine DNA glycosylase
ILMN_21075	0.116558	0.00395	-3.95902	-2.22805	-0.649533	KPNA6	karyopherin subunit alpha 6
ILMN_15847	0.116592	0.00396	3.95782	-2.22986	0.872765	RCAN1	regulator of calcineurin 1
ILMN_26889	0.116833	0.00398	-3.95447	-2.23487	-0.924482	MAGIX	MAGI family member, X-linked
ILMN_5224	0.19016	0.0101	-3.32074	-3.20808	-1	GABARAPL1	GABA type A receptor associated protein like 1
ILMN_138180	0.11684	0.00399	-3.95231	-2.23811	-0.829448	VWF	von Willebrand factor
ILMN_8702	0.167614	0.0078	-3.49363	-2.93848	-1.00515
ILMN_3533	0.0448184	0.000945	-5.01806	-0.71834	-1.0109	LAMB2	laminin subunit beta 2
ILMN_28861	0.0455712	0.000978	-4.99076	-0.75522	-1.01417	SCN2A	sodium voltage-gated channel alpha subunit 2
ILMN_26011	0.118327	0.00406	3.9402	-2.25629	0.667173	ECEL1	endothelin converting enzyme like 1
ILMN_22629	0.118327	0.00406	-3.93953	-2.25729	-0.673651	NFIC	nuclear factor I C
ILMN_2261	0.136977	0.00547	-3.73406	-2.56838	-1.01477	BCAT2	branched chain amino acid transaminase 2
ILMN_22659	0.198746	0.0111	-3.26047	-3.30263	-1.0152	ISLR	immunoglobulin superfamily containing leucine rich repeat
ILMN_24238	0.126034	0.00452	-3.86573	-2.36844	-1.01534	LINGO2	leucine rich repeat and Ig domain containing 2
ILMN_22727	0.127721	0.00463	-3.84818	-2.39497	-1.01727	NR2F2	nuclear receptor subfamily 2 group F member 2
ILMN_20560	0.120396	0.00416	-3.92251	-2.28287	-0.73219	KRT31	keratin 31
ILMN_25148	0.120952	0.00419	3.91832	-2.28917	0.583022	PLEC	plectin
ILMN_10474	0.122396	0.00425	3.90821	-2.30438	0.832628	TSPAN3	tetraspanin 3
ILMN_26941	0.122396	0.00425	3.9081	-2.30455	0.698917	PCTP	phosphatidylcholine transfer protein
ILMN_11899	0.122649	0.00427	-3.90416	-2.31048	-0.88307	OXCT1	3-oxoacid CoA-transferase 1
ILMN_22203	0.122649	0.00428	-3.90301	-2.3122	-0.95117	ZNF85	zinc finger protein 85
ILMN_28367	0.0455712	0.000988	-4.98328	-0.76536	-1.01732	DUSP19	dual specificity phosphatase 19
ILMN_21529	0.122649	0.00429	-3.90176	-2.31409	-0.821732	AMD1	adenosylmethionine decarboxylase 1
ILMN_5305	0.326346	0.0323	-2.57146	-4.39315	-1.02318	APOBEC3B	apolipoprotein B mRNA editing enzyme catalytic subunit 3B
ILMN_1402	0.122649	0.0043	3.89999	-2.31675	0.790223	MSRB2	methionine sulfoxide reductase B2
ILMN_416	0.122649	0.0043	-3.89988	-2.31693	-0.762687	ACSL3	acyl-CoA synthetase long-chain family member 3
ILMN_16171	0.122666	0.00431	-3.89882	-2.31852	-0.811293	FGF14	fibroblast growth factor 14
ILMN_6397	0.123184	0.00433	3.89492	-2.32439	0.840687	COLEC10	collectin subfamily member 10
ILMN_19828	0.123419	0.00435	-3.89263	-2.32784	-0.8682	PGLYRP4	peptidoglycan recognition protein 4
ILMN_20425	0.123444	0.00435	-3.89149	-2.32957	-0.602513	VSIG1	V-set and immunoglobulin domain containing 1
ILMN_8336	0.123444	0.00436	3.89043	-2.33116	0.947326	BDH2	3-hydroxybutyrate dehydrogenase, type 2
ILMN_136965	0.123444	0.00437	-3.88907	-2.33321	-0.998687	B3GALNT1	beta-1,3-N-acetylgalactosaminyltransferase 1 (globoside blood group)
ILMN_4452	0.263891	0.0201	-2.8749	-3.9122	-1.02331	TEAD2	TEA domain transcription factor 2
ILMN_22106	0.258086	0.0188	-2.91685	-3.84564	-1.02397	PPP4R4	protein phosphatase 4 regulatory subunit 4
ILMN_25965	0.387532	0.0493	-2.30425	-4.81221	-1.02831	ISL1	ISL LIM homeobox 1
ILMN_16552	0.124733	0.00443	3.8786	-2.34901	0.85905	TNFRSF11A	TNF receptor superfamily member 11a
ILMN_2975	0.124788	0.00444	-3.87735	-2.3509	-0.679867	SPIRE1	spire type actin nucleation factor 1
ILMN_2256	0.181761	0.00904	-3.39516	-3.09173	-1.0386	SLC1A2	solute carrier family 1 member 2
ILMN_406	0.125357	0.00448	3.87141	-2.35985	0.724038	PANK1	pantothenate kinase 1
ILMN_24100	0.290472	0.0242	-2.75569	-4.10137	-1.04056	KCNN2	potassium calcium-activated channel subfamily N member 2
ILMN_16224	0.125682	0.0045	3.86861	-2.36409	0.682183	ANKRA2	ankyrin repeat family A member 2
ILMN_2099	0.0965695	0.00302	-4.14844	-1.94646	-1.04076	ST3GAL1	ST3 beta-galactoside alpha-2,3-sialyltransferase 1
ILMN_6601	0.126267	0.00454	3.86296	-2.37262	0.753173	NEK3	NIMA related kinase 3
ILMN_17394	0.357605	0.0403	-2.43056	-4.615	-1.04175	C10orf11	chromosome 10 open reading frame 11
ILMN_138254	0.126617	0.00456	-3.85885	-2.37884	-0.906036	ARHGEF39	Rho guanine nucleotide exchange factor 39
ILMN_4185	0.126617	0.00456	3.85878	-2.37894	0.853184	PRKG2	protein kinase, cGMP-dependent, type II
ILMN_2079	0.0580635	0.00138	-4.72395	-1.12142	-1.04417	DGKD	diacylglycerol kinase delta
ILMN_1814	0.122649	0.00429	-3.90116	-2.31499	-1.04497	WRAP53	WD repeat containing antisense to TP53
ILMN_11803	0.32496	0.0319	-2.57953	-4.38041	-1.05123	BLVRB	biliverdin reductase B
ILMN_18895	0.0543705	0.00127	-4.79027	-1.02942	-1.06198	CDT1	chromatin licensing and DNA replication factor 1
ILMN_12302	0.152773	0.00657	-3.60946	-2.75942	-1.06458
ILMN_13040	0.191726	0.0103	-3.31179	-3.22211	-1.06558	GNL3	G protein nucleolar 3
ILMN_7380	0.176205	0.00846	-3.4396	-3.02246	-1.06673	NIM1K	NIM1 serine/threonine protein kinase
ILMN_17136	0.0144872	0.000187	-6.38933	0.99593	-1.07081	SLC2A6	solute carrier family 2 member 6
ILMN_26510	0.128754	0.0047	3.83814	-2.41017	0.753678	DQX1	DEAQ-box RNA dependent ATPase 1
ILMN_25474	0.0612666	0.00151	-4.658	-1.21355	-1.07617	IQGAP3	IQ motif containing GTPase activating protein 3
ILMN_10667	0.12901	0.00472	3.83563	-2.41396	0.760164	MME	membrane metallo-endopeptidase
ILMN_9098	0.0674321	0.00178	-4.53618	-1.38539	-1.07923	RRBP1	ribosome binding protein 1
ILMN_13325	0.129277	0.00474	-3.83237	-2.4189	-0.768699	SLC36A4	solute carrier family 36 member 4
ILMN_21136	0.129597	0.00476	-3.82966	-2.423	-0.883976
ILMN_9368	0.129597	0.00476	-3.82883	-2.42426	-0.639599	CNN2	calponin 2
ILMN_20134	0.129927	0.00478	3.82616	-2.42831	0.849078	PLEKHG6	pleckstrin homology and RhoGEF domain containing G6
ILMN_8213	0.129965	0.00479	-3.82505	-2.42999	-0.610502	CHD4	chromodomain helicase DNA binding protein 4
ILMN_24473	0.0733627	0.00202	-4.44172	-1.52011	-1.07984	SULT1C2	sulfotransferase family 1C member 2
ILMN_23426	0.130248	0.00483	-3.8191	-2.43901	-0.573936	TOMM34	translocase of outer mitochondrial membrane 34
ILMN_27065	0.130248	0.00484	3.81802	-2.44065	0.772278	DGKQ	diacylglycerol kinase theta
ILMN_27526	0.382461	0.0477	-2.32505	-4.77987	-1.08195	RPS23	ribosomal protein S23
ILMN_2319	0.130248	0.00484	3.81734	-2.44168	0.793073	ZNF233	zinc finger protein 233
ILMN_24113	0.290299	0.0242	-2.75645	-4.10018	-1.08367	UGT1A3	UDP glucuronosyltransferase family 1 member A3
ILMN_5210	0.130248	0.00485	3.8165	-2.44295	0.652772	PPP2R5D	protein phosphatase 2 regulatory subunit B'delta
ILMN_28995	0.130248	0.00485	-3.81631	-2.44325	-0.659259	NR5A1	nuclear receptor subfamily 5 group A member 1
ILMN_13270	0.130507	0.00487	-3.81403	-2.44669	-0.954605	BCKDHA	branched chain keto acid dehydrogenase E1, alpha polypeptide
ILMN_1277	0.130529	0.00488	3.81227	-2.44937	0.972737	BCL11B	B-cell CLL/lymphoma 11B
ILMN_2521	0.150369	0.00638	-3.62869	-2.72983	-1.08592	MUM1L1	MUM1 like 1
ILMN_8623	0.130529	0.00489	3.81063	-2.45186	0.727502	C10orf10	chromosome 10 open reading frame 10
ILMN_5579	0.130529	0.00489	3.81034	-2.4523	0.925344	MACC1	metastasis associated in colon cancer 1
ILMN_6742	0.130564	0.0049	3.80917	-2.45407	0.779237	TNFRSF1A	TNF receptor superfamily member 1A
ILMN_139177	0.130564	0.00491	3.80837	-2.45529	0.689937	MGAT4B	mannosyl (alpha-1,3-)-glycoprotein beta-1,4-N-acetylglucosaminyltransferase, isozyme B
ILMN_4172	0.130825	0.00493	-3.80523	-2.46006	-0.584477	FAM181A	family with sequence similarity 181 member A
ILMN_17461	0.130825	0.00493	-3.805	-2.4604	-0.766012
ILMN_138938	0.130825	0.00494	-3.80432	-2.46143	-0.722486	ATP6V1E1	ATPase H+ transporting V1 subunit E1
ILMN_24346	0.228258	0.0144	-3.08826	-3.5741	-1.0864	PKIB	protein kinase (cAMP-dependent, catalytic) inhibitor beta
ILMN_13502	0.131542	0.00498	-3.79798	-2.47107	-0.788221	RNF19A	ring finger protein 19A, RBR E3 ubiquitin protein ligase
ILMN_1147	0.0687935	0.00183	-4.51312	-1.41816	-1.08745	HYAL1	hyaluronoglucosaminidase 1
ILMN_23918	0.131757	0.005	-3.79589	-2.47424	-0.687201	CENPO	centromere protein O
ILMN_22044	0.131997	0.00503	-3.79214	-2.47993	-0.797593	SLC2A11	solute carrier family 2 member 11
ILMN_516	0.181297	0.00895	-3.40201	-3.08103	-1.09618	CYB5R1	cytochrome b5 reductase 1
ILMN_29218	0.0102338	0.000116	-6.83952	1.50283	-1.09828	EDA	ectodysplasin A
ILMN_26884	0.0593643	0.00144	-4.69233	-1.16551	-1.1007
ILMN_8975	0.132634	0.00506	-3.78693	-2.48785	-0.991845	GRID2	glutamate ionotropic receptor delta type subunit 2
ILMN_23294	0.232592	0.0151	-3.0578	-3.62227	-1.10206	RNF213	ring finger protein 213
ILMN_14814	0.133428	0.00511	-3.78098	-2.49689	-0.708831	ADAM28	ADAM metallopeptidase domain 28
ILMN_27978	0.133428	0.00511	-3.7802	-2.49808	-0.862689	TMEM151A	transmembrane protein 151A
ILMN_926	0.133758	0.00514	3.77661	-2.50355	0.938564	CD1D	CD1d molecule
ILMN_17183	0.133758	0.00514	-3.77654	-2.50365	-0.827304	PCDH7	protocadherin 7
ILMN_22526	0.0104436	0.000121	-6.79569	1.45461	-1.10431	NFIC	nuclear factor I C
ILMN_21265	0.133842	0.00516	-3.77459	-2.50662	-0.733593	MDM2	MDM2 proto-oncogene
ILMN_27664	0.134438	0.00519	3.76992	-2.51372	0.903899	SCT	secretin
ILMN_24143	0.134438	0.00519	3.76981	-2.51389	0.701933	AP1AR	adaptor related protein complex 1 associated regulatory protein
ILMN_5325	0.134521	0.00521	3.76737	-2.51761	0.790855	GCH1	GTP cyclohydrolase 1
ILMN_28487	0.130529	0.00489	-3.81116	-2.45105	-1.1078	CXCL17	C-X-C motif chemokine ligand 17
ILMN_9298	0.134521	0.00523	-3.76517	-2.52095	-0.611911	RNF144B	ring finger protein 144B
ILMN_137977	0.134521	0.00523	3.76447	-2.52203	0.995588	ST6GALNAC4	ST6 N-acetylgalactosaminide alpha-2,6-sialyltransferase 4
ILMN_28928	0.134521	0.00524	-3.76389	-2.52291	-0.638197	CYB561D1	cytochrome b561 family member D1
ILMN_2870	0.129156	0.00473	-3.83393	-2.41653	-1.10953	ST3GAL6	ST3 beta-galactoside alpha-2,3-sialyltransferase 6
ILMN_18776	0.134521	0.00524	-3.76301	-2.52425	-0.7632	STX12	syntaxin 12
ILMN_1345	0.114739	0.00388	-3.97205	-2.20853	-1.11244	C16orf78	chromosome 16 open reading frame 78
ILMN_23757	0.134938	0.00528	3.75875	-2.53073	0.682013	ROCK2	Rho associated coiled-coil containing protein kinase 2
ILMN_9271	0.134938	0.00528	3.75867	-2.53085	0.975318	CTNNA2	catenin alpha 2
ILMN_3778	0.135007	0.00529	3.75743	-2.53274	0.739707	BCL2L15	BCL2 like 15
ILMN_29982	0.135007	0.00529	3.75662	-2.53398	0.737321	PDF	peptide deformylase (mitochondrial)
ILMN_25243	0.220093	0.0134	-3.13674	-3.4975	-1.11306	ANO1	anoctamin 1
ILMN_28405	0.136226	0.00537	-3.74701	-2.54863	-0.829144	NR4A2	nuclear receptor subfamily 4 group A member 2
ILMN_139189	0.136226	0.00538	3.74544	-2.55102	0.609974	PCGF5	polycomb group ring finger 5
ILMN_2921	0.098562	0.00311	-4.12773	-1.97701	-1.11398	COL16A1	collagen type XVI alpha 1 chain
ILMN_27645	0.136226	0.00538	-3.74471	-2.55213	-0.903602	CADM2	cell adhesion molecule 2
ILMN_12599	0.136226	0.00539	3.74409	-2.55308	0.889918	CA7	carbonic anhydrase 7
ILMN_19268	0.321708	0.0314	-2.59028	-4.36343	-1.12027	AZGP1	alpha-2-glycoprotein 1, zinc-binding
ILMN_14079	0.214752	0.0126	-3.17467	-3.43767	-1.12042	PTP4A3	protein tyrosine phosphatase type IVA, member 3
ILMN_25008	0.136226	0.00541	3.74197	-2.55631	0.958718	2020-03-03	membrane associated ring-CH-type finger 3
ILMN_25857	0.0685757	0.00182	-4.51854	-1.41046	-1.1226	IRAK3	interleukin 1 receptor associated kinase 3
ILMN_15739	0.136226	0.00541	3.74108	-2.55768	0.650282	CLCN2	chloride voltage-gated channel 2
ILMN_28994	0.251153	0.0178	-2.95316	-3.78804	-1.12279	DUOXA1	dual oxidase maturation factor 1
ILMN_15372	0.136627	0.00544	3.73748	-2.56316	0.904821	INPP1	inositol polyphosphate-1-phosphatase
ILMN_22168	0.136807	0.00546	3.73574	-2.56581	0.588571
ILMN_28633	0.066476	0.00172	-4.55929	-1.35262	-1.12454	RDX	radixin
ILMN_10702	0.136982	0.00548	-3.7332	-2.56969	-0.63557	TTN	titin
ILMN_27781	0.137536	0.00551	3.72831	-2.57716	0.622187	PDLIM3	PDZ and LIM domain 3
ILMN_26621	0.136226	0.00541	-3.7413	-2.55734	-1.12999	NCAPD2	non-SMC condensin I complex subunit D2
ILMN_2453	0.137536	0.00552	3.72795	-2.57771	0.705751	TSPAN3	tetraspanin 3
ILMN_16938	0.254249	0.0183	-2.93513	-3.81663	-1.13286	ERCC6L	ERCC excision repair 6 like, spindle assembly checkpoint helicase
ILMN_22279	0.138275	0.00556	-3.72263	-2.58584	-0.779665	EGFL6	EGF like domain multiple 6
ILMN_13969	0.138501	0.00558	-3.71995	-2.58992	-0.74416	PCOLCE	procollagen C-endopeptidase enhancer
ILMN_2883	0.138501	0.00558	-3.71986	-2.59007	-0.641853	SPO11	SPO11, initiator of meiotic double stranded breaks
ILMN_30285	0.138589	0.0056	3.71812	-2.59273	0.638043	CYP4V2	cytochrome P450 family 4 subfamily V member 2
ILMN_17520	0.0144316	0.000185	-6.39908	1.00719	-1.13326	LOC81691	exonuclease NEF-sp
ILMN_138270	0.139265	0.00564	3.71289	-2.60073	0.814408	AMFR	autocrine motility factor receptor
ILMN_1894	0.139265	0.00564	3.71281	-2.60084	0.775008	IL5RA	interleukin 5 receptor subunit alpha
ILMN_23979	0.310218	0.028	-2.66195	-4.25	-1.13514	SNTB1	syntrophin beta 1
ILMN_7981	0.237995	0.0158	-3.02923	-3.6675	-1.13824	GPBAR1	G protein-coupled bile acid receptor 1
ILMN_7912	0.140065	0.00569	-3.70644	-2.61058	-0.5663	HOXC5	homeobox C5
ILMN_11872	0.0204228	0.000309	-5.94039	0.46381	-1.14605	ACSM5	acyl-CoA synthetase medium-chain family member 5
ILMN_12678	0.140987	0.00575	-3.70033	-2.61992	-0.847747	COBLL1	cordon-bleu WH2 repeat protein like 1
ILMN_20430	0.14108	0.00576	3.69907	-2.62186	0.55182	CMTR2	cap methyltransferase 2
ILMN_4487	0.224942	0.014	-3.10577	-3.54642	-1.14751	PPP1R3C	protein phosphatase 1 regulatory subunit 3C
ILMN_137989	0.141859	0.0058	-3.69359	-2.63024	-0.613462	NPC1	NPC intracellular cholesterol transporter 1
ILMN_4538	0.141859	0.00581	-3.69272	-2.63158	-0.633037	APBA3	amyloid beta precursor protein binding family A member 3
ILMN_136977	0.160807	0.00725	-3.54284	-2.86224	-1.15077	CYFIP2	cytoplasmic FMR1 interacting protein 2
ILMN_1307	0.0945705	0.00295	-4.16607	-1.92049	-1.15338	DBT	dihydrolipoamide branched chain transacylase E2
ILMN_20316	0.141924	0.00584	3.68966	-2.63626	0.685144	PAG1	phosphoprotein membrane anchor with glycosphingolipid microdomains 1
ILMN_3086	0.141924	0.00584	-3.68934	-2.63676	-0.837412	GAS1	growth arrest specific 1
ILMN_27771	0.11684	0.004	-3.95134	-2.23956	-1.15367	CHRM3	cholinergic receptor muscarinic 3
ILMN_27141	0.142352	0.00588	3.68486	-2.64361	0.780064	CEP57	centrosomal protein 57
ILMN_30252	0.142352	0.00588	-3.6845	-2.64417	-0.61156	COG7	component of oligomeric golgi complex 7
ILMN_19659	0.271953	0.0215	-2.83171	-3.98075	-1.16088	LAMC2	laminin subunit gamma 2
ILMN_24640	0.14237	0.00589	-3.68318	-2.64618	-0.76676	ZNF672	zinc finger protein 672
ILMN_6390	0.142531	0.00591	-3.68162	-2.64858	-0.924682	ALDH3A1	aldehyde dehydrogenase 3 family member A1
ILMN_25004	0.0485976	0.00108	-4.9112	-0.86332	-1.1626	RASIP1	Ras interacting protein 1
ILMN_13910	0.14379	0.00598	-3.67359	-2.66089	-0.772543	AMBP	alpha-1-microglobulin/bikunin precursor
ILMN_7705	0.14379	0.00598	3.67323	-2.66143	0.813384	LEAP2	liver enriched antimicrobial peptide 2
ILMN_25191	0.143922	0.00599	-3.67181	-2.66361	-0.796666	HAMP	hepcidin antimicrobial peptide
ILMN_11390	0.146182	0.00609	-3.66042	-2.68109	-0.638955	RANBP3L	RAN binding protein 3 like
ILMN_12841	0.0113075	0.000136	-6.68879	1.336	-1.16403	HTR1E	5-hydroxytryptamine receptor 1E
ILMN_28899	0.0608898	0.0015	-4.66414	-1.20494	-1.16715	PLIN5	perilipin 5
ILMN_7503	0.146587	0.00613	3.65616	-2.68762	0.671254	OXER1	oxoeicosanoid receptor 1
ILMN_16363	0.14682	0.00615	3.65429	-2.69049	0.625427	TNFSF13	tumor necrosis factor superfamily member 13
ILMN_7221	0.147127	0.00617	-3.65208	-2.69388	-0.551544	FBXW7	F-box and WD repeat domain containing 7
ILMN_27699	0.147683	0.0062	3.64873	-2.69902	0.667244	UFSP1	UFM1 specific peptidase 1 (inactive)
ILMN_22295	0.0688449	0.00184	-4.50989	-1.42276	-1.16848	SYN2	synapsin II
ILMN_7155	0.148486	0.00625	3.64308	-2.70771	0.741478	TMEM135	transmembrane protein 135
ILMN_28596	0.232473	0.0151	-3.05999	-3.61881	-1.1725	TM7SF2	transmembrane 7 superfamily member 2
ILMN_3272	0.148486	0.00626	-3.64191	-2.7095	-0.639965	TCEAL9	transcription elongation factor A like 9
ILMN_26201	0.14853	0.00627	3.64093	-2.71101	0.603989	LCLAT1	lysocardiolipin acyltransferase 1
ILMN_12948	0.149118	0.0063	-3.63747	-2.71633	-0.680045
ILMN_21680	0.149792	0.00634	3.63363	-2.72224	0.784875	QPRT	quinolinate phosphoribosyltransferase
ILMN_21573	0.150369	0.00637	-3.62998	-2.72784	-0.604893	POLH	DNA polymerase eta
ILMN_4015	0.150369	0.00638	-3.62942	-2.72871	-0.719738	ATP2B4	ATPase plasma membrane Ca2+ transporting 4
ILMN_1839	0.219132	0.0133	-3.14289	-3.4878	-1.17319	CWH43	cell wall biogenesis 43 C-terminal homolog
ILMN_28402	0.151264	0.00643	-3.62389	-2.73721	-0.732611	IL6ST	interleukin 6 signal transducer
ILMN_138678	0.151311	0.00644	-3.6229	-2.73873	-0.660081	SORBS1	sorbin and SH3 domain containing 1
ILMN_29020	0.151554	0.00646	3.62104	-2.7416	0.686619	TMPRSS4	transmembrane protease, serine 4
ILMN_4879	0.151746	0.00648	3.61801	-2.74625	0.648302	LYZ	lysozyme
ILMN_1805	0.0672553	0.00177	-4.54016	-1.37975	-1.17641	IMPDH1	inosine monophosphate dehydrogenase 1
ILMN_18395	0.151746	0.00649	-3.61787	-2.74648	-0.567563	ATP6V1H	ATPase H+ transporting V1 subunit H
ILMN_25604	0.152705	0.00655	-3.61155	-2.7562	-0.771966	CAPN13	calpain 13
ILMN_24903	0.152705	0.00655	-3.61132	-2.75656	-0.675087	PRR14	proline rich 14
ILMN_136925	0.152705	0.00655	3.6113	-2.75659	0.700226	MGAT4B	mannosyl (alpha-1,3-)-glycoprotein beta-1,4-N-acetylglucosaminyltransferase, isozyme B
ILMN_138759	0.0593643	0.00144	-4.6925	-1.16527	-1.18004	KCNIP3	potassium voltage-gated channel interacting protein 3
ILMN_19134	0.118405	0.00408	-3.93709	-2.26095	-1.18217	PAQR5	progestin and adipoQ receptor family member 5
ILMN_5640	0.152897	0.00658	3.60771	-2.76212	0.657127	CARMIL1	capping protein regulator and myosin 1 linker 1
ILMN_912	0.152897	0.00659	-3.60738	-2.76262	-0.787448	PLXNA1	plexin A1
ILMN_2485	0.142352	0.00588	-3.68407	-2.64482	-1.1841	SLC25A4	solute carrier family 25 member 4
ILMN_16440	0.153425	0.00663	-3.60254	-2.77008	-0.811206	PLCL1	phospholipase C like 1
ILMN_19957	0.153425	0.00664	-3.60195	-2.77099	-0.630916	PTPRM	protein tyrosine phosphatase, receptor type M
ILMN_27734	0.153425	0.00665	-3.60137	-2.77188	-0.975279	TMEM211	transmembrane protein 211
ILMN_21653	0.153425	0.00666	3.59991	-2.77414	0.65355	AP1S1	adaptor related protein complex 1 sigma 1 subunit
ILMN_29245	0.153425	0.00667	3.5989	-2.7757	0.659056	MAPKAPK5	mitogen-activated protein kinase-activated protein kinase 5
ILMN_12072	0.124122	0.0044	-3.8838	-2.34116	-1.19925	HPN	hepsin
ILMN_4275	0.153425	0.00668	3.59826	-2.77668	0.662258	HNF4A	hepatocyte nuclear factor 4 alpha
ILMN_21714	0.153425	0.00668	-3.59822	-2.77674	-0.585045	RNFT2	ring finger protein, transmembrane 2
ILMN_6237	0.154454	0.00673	3.59295	-2.78486	0.68931	TSPAN2	tetraspanin 2
ILMN_17149	0.15447	0.00674	3.59213	-2.78613	0.616802	PTPRG	protein tyrosine phosphatase, receptor type G
ILMN_25998	0.154698	0.00675	-3.59038	-2.78883	-0.663621	AFF3	AF4/FMR2 family member 3
ILMN_13683	0.155005	0.00679	-3.58709	-2.7939	-0.575595	TANGO2	transport and golgi organization 2 homolog
ILMN_20357	0.155005	0.00679	-3.58658	-2.79468	-0.645088	LEPR	leptin receptor
ILMN_22205	0.155005	0.0068	3.58627	-2.79516	0.648726	GPR25	G protein-coupled receptor 25
ILMN_19476	0.128536	0.00468	-3.84186	-2.40452	-1.20053	BHMT	betaine--homocysteine S-methyltransferase
ILMN_19506	0.155005	0.00681	3.58529	-2.79667	0.766463	STK38L	serine/threonine kinase 38 like
ILMN_1721	0.155218	0.00682	-3.58362	-2.79926	-0.541879
ILMN_20082	0.155618	0.00685	-3.58113	-2.80309	-0.615445	TRPC4AP	transient receptor potential cation channel subfamily C member 4 associated protein
ILMN_11514	0.344171	0.0364	-2.49658	-4.51125	-1.20125	FXYD4	FXYD domain containing ion transport regulator 4
ILMN_503	0.156148	0.00689	-3.57735	-2.80893	-0.951977	OR13C2	olfactory receptor family 13 subfamily C member 2
ILMN_17016	0.156486	0.00691	3.57515	-2.81233	0.685673	ANO9	anoctamin 9
ILMN_21579	0.156682	0.00693	-3.57286	-2.81585	-0.899373	USF1	upstream transcription factor 1
ILMN_11461	0.156682	0.00693	-3.57281	-2.81593	-0.558286	PSMD5	proteasome 26S subunit, non-ATPase 5
ILMN_21204	0.157096	0.00696	-3.5703	-2.81981	-0.721492
ILMN_137089	0.157316	0.00698	-3.56807	-2.82326	-0.597113	PRR11	proline rich 11
ILMN_7220	0.157316	0.00698	-3.56787	-2.82356	-0.690165	C8orf46	chromosome 8 open reading frame 46
ILMN_4633	0.15748	0.007	3.56643	-2.82578	0.748689	REEP3	receptor accessory protein 3
ILMN_11438	0.157971	0.00703	3.56325	-2.8307	0.673983	CASP6	caspase 6
ILMN_13180	0.157971	0.00704	3.56286	-2.83129	0.774968	KRT73	keratin 73
ILMN_5176	0.158454	0.00706	-3.56007	-2.83561	-0.673012	SLC44A2	solute carrier family 44 member 2
ILMN_23866	0.158866	0.0071	-3.55687	-2.84055	-0.666999	FOXRED1	FAD dependent oxidoreductase domain containing 1
ILMN_17431	0.158866	0.0071	-3.55685	-2.84058	-0.64899	OR51D1	olfactory receptor family 51 subfamily D member 1
ILMN_17118	0.158922	0.00711	-3.55588	-2.84208	-0.620081	MAP3K9	mitogen-activated protein kinase kinase kinase 9
ILMN_4422	0.159262	0.00713	-3.55347	-2.84581	-0.604895	ACOX3	acyl-CoA oxidase 3, pristanoyl
ILMN_26616	0.159262	0.00714	-3.55298	-2.84657	-0.97387	TFCP2L1	transcription factor CP2-like 1
ILMN_23440	0.160216	0.00719	3.54779	-2.85459	0.773813	BFAR	bifunctional apoptosis regulator
ILMN_9001	0.160216	0.0072	-3.54745	-2.85512	-0.596167	C7orf49	chromosome 7 open reading frame 49
ILMN_5800	0.175788	0.0084	-3.44437	-3.01503	-1.20237	PHGDH	phosphoglycerate dehydrogenase
ILMN_5713	0.16073	0.00724	-3.54389	-2.86062	-0.826747	BTLA	B and T lymphocyte associated
ILMN_9887	0.228258	0.0144	-3.0892	-3.57261	-1.20244	EYA1	EYA transcriptional coactivator and phosphatase 1
ILMN_26472	0.161105	0.00727	-3.54087	-2.86529	-0.553053	SOST	sclerostin
ILMN_3053	0.161281	0.00729	-3.53942	-2.86754	-0.703707	UNC5B	unc-5 netrin receptor B
ILMN_28455	0.357025	0.0401	-2.43405	-4.60954	-1.2039	KIAA0895	KIAA0895
ILMN_21202	0.161708	0.00732	-3.53619	-2.87253	-0.643241	LINC00472	long intergenic non-protein coding RNA 472
ILMN_1759	0.140065	0.00569	-3.70644	-2.61058	-1.20601	ATP5G1	ATP synthase, H+ transporting, mitochondrial Fo complex subunit C1 (subunit 9)
ILMN_8954	0.14292	0.00593	-3.67896	-2.65265	-1.20765	UGT1A6	UDP glucuronosyltransferase family 1 member A6
ILMN_3335	0.16225	0.00737	3.53117	-2.8803	0.790441	CDC42EP2	CDC42 effector protein 2
ILMN_1931	0.16225	0.00738	3.53063	-2.88114	0.552773	HIST1H2AD	histone cluster 1, H2ad
ILMN_21263	0.16225	0.00738	3.53034	-2.88159	0.740643	APOLD1	apolipoprotein L domain containing 1
ILMN_138561	0.163094	0.00743	-3.52614	-2.8881	-0.943723	PDGFD	platelet derived growth factor D
ILMN_3685	0.254769	0.0183	-2.93294	-3.82011	-1.21282	TAF13	TATA-box binding protein associated factor 13
ILMN_29402	0.164072	0.00749	-3.52048	-2.89685	-0.573823	FGA	fibrinogen alpha chain
ILMN_25446	0.164072	0.0075	-3.51998	-2.89764	-0.782119	SLC7A5	solute carrier family 7 member 5
ILMN_9429	0.164932	0.00755	-3.51575	-2.90418	-0.651771	FKBP4	FK506 binding protein 4
ILMN_11540	0.164982	0.00756	-3.51484	-2.9056	-0.574822	NEIL2	nei like DNA glycosylase 2
ILMN_9364	0.165166	0.00757	3.51333	-2.90794	0.544199	ATG2B	autophagy related 2B
ILMN_14195	0.165166	0.00758	-3.51266	-2.90897	-0.654957	ASNS	asparagine synthetase (glutamine-hydrolyzing)
ILMN_17906	0.165175	0.00759	3.51192	-2.91012	0.925523	FAM213A	family with sequence similarity 213 member A
ILMN_11678	0.165365	0.00761	3.51033	-2.91259	0.914142	NTS	neurotensin
ILMN_19331	0.165365	0.00761	-3.50973	-2.91352	-0.78193	CDCA2	cell division cycle associated 2
ILMN_13830	0.165423	0.00762	3.50879	-2.91498	0.57358	VPS36	vacuolar protein sorting 36 homolog
ILMN_13624	0.165943	0.00766	3.50597	-2.91934	0.946537	MAST2	microtubule associated serine/threonine kinase 2
ILMN_3457	0.166082	0.00767	-3.50471	-2.92131	-0.54933	MSL3	male-specific lethal 3 homolog (Drosophila)
ILMN_28167	0.167475	0.00774	-3.4984	-2.93108	-0.669535	NFKBIE	NFKB inhibitor epsilon
ILMN_13859	0.167489	0.00777	-3.49637	-2.93423	-0.829136	FZD4	frizzled class receptor 4
ILMN_27821	0.167489	0.00777	3.49625	-2.93443	0.904117	CLYBL	citrate lyase beta like
ILMN_22399	0.167489	0.00777	-3.49624	-2.93444	-0.57651	KCNE4	potassium voltage-gated channel subfamily E regulatory subunit 4
ILMN_13248	0.167555	0.00778	3.49527	-2.93594	0.587526	TPST2	tyrosylprotein sulfotransferase 2
ILMN_28983	0.203014	0.0115	-3.2346	-3.3433	-1.21452	DDX17	DEAD-box helicase 17
ILMN_24725	0.131997	0.00503	-3.79112	-2.48148	-1.21821	E2F8	E2F transcription factor 8
ILMN_11386	0.16816	0.00783	3.49075	-2.94295	0.641141
ILMN_3446	0.168322	0.00785	3.48941	-2.94503	0.675079	SULT2B1	sulfotransferase family 2B member 1
ILMN_6395	0.168771	0.00788	3.48693	-2.94888	0.740121	PRPH	peripherin
ILMN_138785	0.168782	0.00789	3.48592	-2.95045	0.666917	CDKN2C	cyclin dependent kinase inhibitor 2C
ILMN_23836	0.168782	0.00789	-3.48549	-2.95111	-0.655202	ST5	suppression of tumorigenicity 5
ILMN_139145	0.169028	0.00791	-3.48382	-2.95371	-0.688517	ALOX15B	arachidonate 15-lipoxygenase, type B
ILMN_16147	0.170232	0.00798	3.47838	-2.96216	0.94387	ZDHHC21	zinc finger DHHC-type containing 21
ILMN_11065	0.316932	0.0302	-2.61482	-4.32462	-1.22014	ODAM	odontogenic, ameloblast asssociated
ILMN_29826	0.170316	0.00801	-3.47614	-2.96563	-0.900833	TFAP2E	transcription factor AP-2 epsilon
ILMN_2804	0.182224	0.00912	-3.38952	-3.10052	-1.22014	GSTM3	glutathione S-transferase mu 3
ILMN_26123	0.170316	0.00802	-3.47528	-2.96697	-0.717773	MECOM	MDS1 and EVI1 complex locus
ILMN_15608	0.105953	0.00345	-4.05406	-2.08617	-1.2208	FARP1	FERM, ARH/RhoGEF and pleckstrin domain protein 1
ILMN_21276	0.17042	0.00804	-3.47349	-2.96975	-0.562899	DLX4	distal-less homeobox 4
ILMN_5354	0.195771	0.0107	-3.28237	-3.26825	-1.22635	GPT2	glutamic--pyruvic transaminase 2
ILMN_25881	0.0494249	0.00111	-4.88997	-0.89232	-1.22847	GLUL	glutamate-ammonia ligase
ILMN_137214	0.171313	0.0081	-3.46793	-2.97839	-0.864362	GABRB3	gamma-aminobutyric acid type A receptor beta3 subunit
ILMN_14232	0.171404	0.00812	-3.46689	-2.98001	-0.770413	PIGN	phosphatidylinositol glycan anchor biosynthesis class N
ILMN_5090	0.17166	0.00814	-3.46521	-2.98262	-0.629444	ARAP3	ArfGAP with RhoGAP domain, ankyrin repeat and PH domain 3
ILMN_11674	0.172599	0.00819	3.46088	-2.98935	0.648872	CASP6	caspase 6
ILMN_28708	0.173332	0.00823	3.45737	-2.99482	0.77971	SETD9	SET domain containing 9
ILMN_29752	0.173753	0.00826	-3.45506	-2.9984	-0.62188	OR6X1	olfactory receptor family 6 subfamily X member 1
ILMN_5134	0.17469	0.00831	-3.45079	-3.00505	-0.72981	C1orf112	chromosome 1 open reading frame 112
ILMN_21250	0.175434	0.00836	-3.44727	-3.01052	-0.835865	TRIM73	tripartite motif containing 73
ILMN_12725	0.137536	0.00552	-3.72824	-2.57727	-1.23024	PLTP	phospholipid transfer protein
ILMN_24616	0.286759	0.0236	-2.77017	-4.07841	-1.24913	GREM2	gremlin 2, DAN family BMP antagonist
ILMN_20035	0.175788	0.0084	3.44377	-3.01596	0.805132	FBXO32	F-box protein 32
ILMN_14228	0.175788	0.00841	-3.44321	-3.01684	-0.648184	PRY	PTPN13-like, Y-linked
ILMN_8486	0.136226	0.00536	-3.74776	-2.54749	-1.25545	CMTM7	CKLF like MARVEL transmembrane domain containing 7
ILMN_4560	0.176144	0.00844	-3.44051	-3.02105	-0.54224	RAI14	retinoic acid induced 14
ILMN_13686	0.152773	0.00656	-3.61008	-2.75846	-1.26052	MAST4	microtubule associated serine/threonine kinase family member 4
ILMN_4734	0.00881783	9.46e-05	-7.03549	1.71552	-1.26793	DCAF12L1	DDB1 and CUL4 associated factor 12 like 1
ILMN_21953	0.234665	0.0153	-3.04963	-3.6352	-1.27028	MAP4	microtubule associated protein 4
ILMN_22973	0.177457	0.00854	3.43285	-3.03296	0.699283	PDE5A	phosphodiesterase 5A
ILMN_25533	0.17751	0.00855	-3.43198	-3.03432	-0.570676	TOP3B	topoisomerase (DNA) III beta
ILMN_8877	0.178362	0.0086	-3.42812	-3.04034	-0.527389	VPS18	VPS18, CORVET/HOPS core subunit
ILMN_3026	0.178552	0.00862	-3.42674	-3.04248	-0.918623	FAM101A	family with sequence similarity 101 member A
ILMN_16601	0.178594	0.00863	3.42591	-3.04377	0.717373	SORL1	sortilin related receptor 1
ILMN_681	0.178827	0.00865	3.42438	-3.04616	0.525643	MAP7	microtubule associated protein 7
ILMN_4998	0.179265	0.00868	3.42203	-3.04981	0.51185	FBXL3	F-box and leucine rich repeat protein 3
ILMN_26904	0.0232423	0.000368	-5.79081	0.28037	-1.27681	PDZD9	PDZ domain containing 9
ILMN_25763	0.179265	0.0087	-3.42063	-3.052	-0.739447	SLC6A6	solute carrier family 6 member 6
ILMN_26214	0.179265	0.00871	3.41968	-3.05348	0.848503	MMP1	matrix metallopeptidase 1
ILMN_18755	0.179265	0.00872	-3.41941	-3.0539	-0.93279	GATS	GATS, stromal antigen 3 opposite strand
ILMN_13882	0.141859	0.00582	-3.69126	-2.6338	-1.27835	FGB	fibrinogen beta chain
ILMN_19468	0.179414	0.00875	-3.41679	-3.05799	-0.621305	RBM48	RNA binding motif protein 48
ILMN_19344	0.179414	0.00876	3.4161	-3.05907	0.72657	SPRY2	sprouty RTK signaling antagonist 2
ILMN_17724	0.179414	0.00876	3.41588	-3.0594	0.677625	KRT20	keratin 20
ILMN_28744	0.179414	0.00877	3.41554	-3.05994	0.660276	LPIN1	lipin 1
ILMN_20003	0.179734	0.0088	-3.41274	-3.06431	-0.619343	RHBDL2	rhomboid like 2
ILMN_12639	0.179734	0.00881	-3.41208	-3.06533	-0.851187	SERHL2	serine hydrolase-like 2
ILMN_21948	0.179734	0.00881	-3.41204	-3.06539	-0.696749	PHF6	PHD finger protein 6
ILMN_25441	0.179734	0.00882	3.41171	-3.06591	0.757207	EFL1	elongation factor like GTPase 1
ILMN_27886	0.179952	0.00884	-3.40965	-3.06912	-0.615957	C21orf2	chromosome 21 open reading frame 2
ILMN_21369	0.179952	0.00885	-3.40959	-3.06922	-0.649166	TIMELESS	timeless circadian clock
ILMN_11869	0.181148	0.00891	3.40452	-3.07711	0.553146	SOCS6	suppressor of cytokine signaling 6
ILMN_971	0.181297	0.00893	-3.4031	-3.07933	-0.665973	SAGE1	sarcoma antigen 1
ILMN_25422	0.181297	0.00894	-3.40255	-3.08019	-0.61343	PPP2R1B	protein phosphatase 2 scaffold subunit Abeta
ILMN_25223	0.0445934	0.000937	-5.02432	-0.70991	-1.27925	ABCC5	ATP binding cassette subfamily C member 5
ILMN_5982	0.181761	0.00898	3.39927	-3.08531	0.677325	AMY2B	amylase, alpha 2B (pancreatic)
ILMN_24904	0.181761	0.00901	-3.39707	-3.08874	-0.799511	STARD8	StAR related lipid transfer domain containing 8
ILMN_2825	0.0161739	0.00022	-6.2409	0.82301	-1.28644	SLC41A1	solute carrier family 41 member 1
ILMN_6117	0.181761	0.00903	-3.396	-3.0904	-0.986339	ANKDD1A	ankyrin repeat and death domain containing 1A
ILMN_618	0.181761	0.00903	-3.3955	-3.09118	-0.596883	ANKRD16	ankyrin repeat domain 16
ILMN_24634	0.0205313	0.000313	-5.93029	0.45152	-1.28982	CUX2	cut like homeobox 2
ILMN_14134	0.181761	0.00904	3.39515	-3.09173	0.671235	COL24A1	collagen type XXIV alpha 1 chain
ILMN_21428	0.163126	0.00744	-3.52529	-2.88941	-1.30135	G0S2	G0/G1 switch 2
ILMN_30356	0.181778	0.00905	-3.39438	-3.09293	-0.676922	GCNT2	glucosaminyl (N-acetyl) transferase 2, I-branching enzyme (I blood group)
ILMN_27662	0.00721	7.14e-05	-7.31567	2.01156	-1.30432	DRD5	dopamine receptor D5
ILMN_27814	0.182224	0.0091	3.39074	-3.09862	0.530308	PREP	prolyl endopeptidase
ILMN_22293	0.182224	0.00911	-3.39001	-3.09976	-0.595099	KLC1	kinesin light chain 1
ILMN_20249	0.182224	0.00911	-3.3898	-3.10009	-0.800236	TCEAL3	transcription elongation factor A like 3
ILMN_25780	0.0199118	0.000296	-5.97945	0.5112	-1.30584	PCDH7	protocadherin 7
ILMN_27916	0.182368	0.00914	-3.38777	-3.10326	-0.699054	ACTRT1	actin related protein T1
ILMN_27171	0.182368	0.00914	3.38771	-3.10335	0.740715	EGLN3	egl-9 family hypoxia inducible factor 3
ILMN_19152	0.18257	0.00917	-3.38555	-3.10672	-0.645143	EPOR	erythropoietin receptor
ILMN_28065	0.18257	0.00918	3.38515	-3.10735	0.824617	SYT13	synaptotagmin 13
ILMN_6475	0.18257	0.00918	3.38505	-3.10751	0.560571	NACA2	nascent polypeptide associated complex alpha subunit 2
ILMN_24115	0.18265	0.00919	-3.38412	-3.10896	-0.534849	GLRA1	glycine receptor alpha 1
ILMN_9418	0.182751	0.00921	-3.38293	-3.11082	-0.908115	SYNGR1	synaptogyrin 1
ILMN_17070	0.182751	0.00922	3.38171	-3.11272	0.90375	RBBP8NL	RBBP8 N-terminal like
ILMN_5010	0.356985	0.0401	-2.43452	-4.60878	-1.31484	ADHFE1	alcohol dehydrogenase, iron containing 1
ILMN_28765	0.182751	0.00923	3.38119	-3.11353	0.647253	CARD10	caspase recruitment domain family member 10
ILMN_3897	0.0560399	0.00132	-4.76083	-1.07019	-1.31612	BIRC3	baculoviral IAP repeat containing 3
ILMN_26176	0.203282	0.0116	-3.23094	-3.34906	-1.33028	FGG	fibrinogen gamma chain
ILMN_30363	0.183306	0.0093	-3.37641	-3.12099	-0.850054	ALDH4A1	aldehyde dehydrogenase 4 family member A1
ILMN_11844	0.183306	0.0093	-3.37623	-3.12127	-0.624519	FANCD2	Fanconi anemia complementation group D2
ILMN_17001	0.183306	0.0093	3.37599	-3.12165	0.684121	TBC1D32	TBC1 domain family member 32
ILMN_25089	0.1836	0.00933	-3.37429	-3.1243	-0.837356	TESC	tescalcin
ILMN_14974	0.070666	0.00191	-4.48067	-1.4644	-1.33096	FBXO27	F-box protein 27
ILMN_29210	0.00912173	9.99e-05	-6.98265	1.65863	-1.33417	GCKR	glucokinase (hexokinase 4) regulator
ILMN_4843	0.184071	0.00939	3.37014	-3.13079	0.605165	CISD1	CDGSH iron sulfur domain 1
ILMN_10389	0.184071	0.00939	-3.37006	-3.13091	-0.871918	POLQ	DNA polymerase theta
ILMN_10570	0.184086	0.0094	3.36896	-3.13264	0.666038	CASP14	caspase 14
ILMN_5417	0.184086	0.00941	-3.36875	-3.13297	-0.718733	PTPN1	protein tyrosine phosphatase, non-receptor type 1
ILMN_24815	0.185168	0.00947	-3.36423	-3.14003	-0.980839	FICD	FIC domain containing
ILMN_21209	0.185423	0.00949	3.36269	-3.14244	0.619322	CDC42EP5	CDC42 effector protein 5
ILMN_8576	0.0585723	0.00141	-4.70706	-1.14495	-1.3444	RNLS	renalase, FAD dependent amine oxidase
ILMN_138755	0.117086	0.00401	-3.94888	-2.24326	-1.34484	HIST2H2BF	histone cluster 2, H2bf
ILMN_24457	0.0184294	0.000265	-6.0767	0.62828	-1.35378	DBN1	drebrin 1
ILMN_585	0.185629	0.00955	-3.35896	-3.14827	-0.585595
ILMN_25301	0.185629	0.00955	-3.35843	-3.1491	-0.8923	FUT1	fucosyltransferase 1 (H blood group)
ILMN_17359	0.185629	0.00957	3.35739	-3.15072	0.78023	BCL11A	B-cell CLL/lymphoma 11A
ILMN_2878	0.185629	0.00957	-3.35708	-3.1512	-0.55184
ILMN_10112	0.185629	0.00957	3.35694	-3.15142	0.642454
ILMN_21198	0.186646	0.00964	-3.3527	-3.15806	-0.673705	CLN8	ceroid-lipofuscinosis, neuronal 8
ILMN_8388	0.186853	0.00966	-3.35134	-3.16018	-0.61017	KLK10	kallikrein related peptidase 10
ILMN_14683	0.186906	0.00967	3.35047	-3.16154	0.652047	CCNL1	cyclin L1
ILMN_15768	0.127442	0.00461	-3.85242	-2.38856	-1.35396	DUOX1	dual oxidase 1
ILMN_5583	0.186915	0.00969	-3.34926	-3.16344	-0.51557	RECQL	RecQ like helicase
ILMN_13852	0.187305	0.00972	3.34726	-3.16657	0.613393	KCNJ5	potassium voltage-gated channel subfamily J member 5
ILMN_14009	0.188031	0.00976	-3.34407	-3.17156	-0.617561	KLHDC8A	kelch domain containing 8A
ILMN_7394	0.188031	0.00979	-3.34215	-3.17455	-0.655051	CCNO	cyclin O
ILMN_20030	0.188031	0.0098	3.34125	-3.17597	0.555143	NEUROG2	neurogenin 2
ILMN_20832	0.188031	0.00981	3.3411	-3.1762	0.630945	MIER3	MIER family member 3
ILMN_11856	0.0258391	0.000423	-5.67248	0.13302	-1.36056	ZNF467	zinc finger protein 467
ILMN_13455	0.188031	0.00982	3.34049	-3.17716	0.643755	LRRC6	leucine rich repeat containing 6
ILMN_27925	0.188031	0.00982	-3.34037	-3.17734	-0.506395	GDF5	growth differentiation factor 5
ILMN_14216	0.188066	0.00983	-3.33963	-3.1785	-0.607309	CRELD1	cysteine rich with EGF like domains 1
ILMN_24464	0.188465	0.00986	-3.33762	-3.18165	-0.540043	DICER1	dicer 1, ribonuclease III
ILMN_11064	0.188874	0.00989	-3.33523	-3.18539	-0.644662	ARHGEF17	Rho guanine nucleotide exchange factor 17
ILMN_5930	0.0905024	0.00274	-4.21992	-1.84144	-1.37956	LIFR	leukemia inhibitory factor receptor alpha
ILMN_21181	0.188874	0.00991	-3.33434	-3.18678	-0.63688	ARHGEF2	Rho/Rac guanine nucleotide exchange factor 2
ILMN_3374	0.188961	0.00994	3.33237	-3.18987	0.892571	CTGF	connective tissue growth factor
ILMN_13141	0.188961	0.00996	-3.33088	-3.19221	-0.77914	TROAP	trophinin associated protein
ILMN_7498	0.188961	0.00996	-3.33071	-3.19246	-0.545484	FBXO43	F-box protein 43
ILMN_17895	0.188961	0.00997	3.33037	-3.19299	0.52522	CSNK1G3	casein kinase 1 gamma 3
ILMN_26203	0.188961	0.00997	-3.33024	-3.19321	-0.873074	GPR155	G protein-coupled receptor 155
ILMN_138400	0.188961	0.00997	-3.33018	-3.19329	-0.593031	DNAI2	dynein axonemal intermediate chain 2
ILMN_27875	0.188961	0.00998	-3.32977	-3.19395	-0.55736
ILMN_19375	0.189347	0.01	3.32691	-3.19841	0.554338	PRSS12	protease, serine 12
ILMN_5933	0.189347	0.01	3.32676	-3.19865	0.653771	SLC30A1	solute carrier family 30 member 1
ILMN_19350	0.189347	0.01	-3.32649	-3.19907	-0.597217	DNAAF1	dynein axonemal assembly factor 1
ILMN_29177	0.189347	0.01	-3.32599	-3.19986	-0.584226	TRIM5	tripartite motif containing 5
ILMN_14598	0.18993	0.0101	-3.32335	-3.20399	-0.50868	TGM7	transglutaminase 7
ILMN_10971	0.190008	0.0101	3.32248	-3.20536	0.607601	PLIN3	perilipin 3
ILMN_139103	0.19016	0.0101	3.32128	-3.20724	0.66244	MNX1	motor neuron and pancreas homeobox 1
ILMN_139255	0.266869	0.0205	-2.85996	-3.93591	-1.3806	KCNIP4	potassium voltage-gated channel interacting protein 4
ILMN_17353	0.0240485	0.000384	-5.75384	0.23454	-1.38902	KIAA1958	KIAA1958
ILMN_1639	0.191197	0.0102	3.31594	-3.2156	0.815582	SIRPA	signal regulatory protein alpha
ILMN_4090	0.191726	0.0102	3.31305	-3.22013	0.855291	ASB18	ankyrin repeat and SOCS box containing 18
ILMN_15317	0.191726	0.0102	-3.31223	-3.22141	-0.827434	ELL2	elongation factor for RNA polymerase II 2
ILMN_2842	0.0796458	0.00228	-4.35108	-1.6506	-1.40009	CTIF	cap binding complex dependent translation initiation factor
ILMN_1129	0.191726	0.0103	3.31116	-3.22309	0.982537	CHRNA5	cholinergic receptor nicotinic alpha 5 subunit
ILMN_16538	0.191726	0.0103	-3.31111	-3.22317	-0.887966
ILMN_13379	0.191761	0.0103	-3.30984	-3.22517	-0.710132	XKR5	XK related 5
ILMN_10579	0.191761	0.0103	-3.3098	-3.22523	-0.637037	ZNF423	zinc finger protein 423
ILMN_21435	0.217313	0.0131	-3.15313	-3.47163	-1.4053	POPDC3	popeye domain containing 3
ILMN_19128	0.192479	0.0103	-3.30612	-3.231	-0.568002	PHKA1	phosphorylase kinase regulatory subunit alpha 1
ILMN_4304	0.192479	0.0103	-3.30554	-3.2319	-0.567424	MDH1	malate dehydrogenase 1
ILMN_17794	0.192993	0.0104	-3.30235	-3.23691	-0.622912	UGGT1	UDP-glucose glycoprotein glucosyltransferase 1
ILMN_16337	0.192993	0.0104	3.302	-3.23746	0.772068	SNAPC1	small nuclear RNA activating complex polypeptide 1
ILMN_2112	0.131997	0.00503	-3.79123	-2.48131	-1.40752	C12orf42	chromosome 12 open reading frame 42
ILMN_25542	0.193259	0.0104	-3.30049	-3.23982	-0.515492	ATP1B1	ATPase Na+/K+ transporting subunit beta 1
ILMN_25543	0.193412	0.0104	3.29938	-3.24157	0.7041	ITPK1	inositol-tetrakisphosphate 1-kinase
ILMN_138509	0.193682	0.0105	3.29786	-3.24395	0.600108	MAP2K6	mitogen-activated protein kinase kinase 6
ILMN_10798	0.194078	0.0105	-3.29592	-3.24699	-0.530599	LAS1L	LAS1 like, ribosome biogenesis factor
ILMN_27745	0.136226	0.00538	-3.74503	-2.55165	-1.40836	IRX5	iroquois homeobox 5
ILMN_14333	0.19436	0.0105	3.29378	-3.25034	0.628073	LGALS3	lectin, galactoside binding soluble 3
ILMN_3518	0.194711	0.0106	3.292	-3.25314	0.970083	ELOVL5	ELOVL fatty acid elongase 5
ILMN_11699	0.194722	0.0106	-3.29138	-3.25412	-0.698965	SLC5A3	solute carrier family 5 member 3
ILMN_12792	0.194895	0.0106	3.2898	-3.25658	0.488871	WDR17	WD repeat domain 17
ILMN_9348	0.194895	0.0106	3.28961	-3.25689	0.777312	PNMA5	paraneoplastic Ma antigen family member 5
ILMN_18524	0.1952	0.0106	-3.28799	-3.25943	-0.791043	YWHAE	tyrosine 3-monooxygenase/tryptophan 5-monooxygenase activation protein epsilon
ILMN_137344	0.195368	0.0107	-3.28613	-3.26236	-0.605764	INTS6	integrator complex subunit 6
ILMN_7174	0.195368	0.0107	3.28575	-3.26294	0.784756	GMEB2	glucocorticoid modulatory element binding protein 2
ILMN_27788	0.195368	0.0107	3.28566	-3.26308	0.598826	WIPI2	WD repeat domain, phosphoinositide interacting 2
ILMN_10101	0.195544	0.0107	-3.28448	-3.26493	-0.567256	SSTR5	somatostatin receptor 5
ILMN_18758	0.195726	0.0107	-3.28329	-3.26681	-0.528916	TNPO1	transportin 1
ILMN_25698	0.170812	0.00806	-3.47127	-2.97321	-1.40846	LARP6	La ribonucleoprotein domain family member 6
ILMN_22910	0.195771	0.0107	-3.28197	-3.26888	-0.589771	MAP3K15	mitogen-activated protein kinase kinase kinase 15
ILMN_9431	0.196048	0.0108	-3.28045	-3.27126	-0.538545	FGF17	fibroblast growth factor 17
ILMN_1643	0.19655	0.0108	-3.27818	-3.27482	-0.650679	PACSIN3	protein kinase C and casein kinase substrate in neurons 3
ILMN_25550	0.196577	0.0108	3.27743	-3.27601	0.582241	MSI1	musashi RNA binding protein 1
ILMN_22648	0.196577	0.0108	3.27693	-3.27678	0.597043	ACRBP	acrosin binding protein
ILMN_22876	0.13792	0.00554	-3.72521	-2.58189	-1.40874	GABRP	gamma-aminobutyric acid type A receptor pi subunit
ILMN_6575	0.196872	0.0108	-3.27478	-3.28016	-0.983284	MAP7D2	MAP7 domain containing 2
ILMN_13198	0.197331	0.0109	-3.27266	-3.28349	-0.596294	OR14J1	olfactory receptor family 14 subfamily J member 1
ILMN_137422	0.197331	0.0109	-3.27178	-3.28487	-0.492785	NAA20	N(alpha)-acetyltransferase 20, NatB catalytic subunit
ILMN_24961	0.340113	0.0352	-2.51613	-4.48045	-1.41661	RDH12	retinol dehydrogenase 12 (all-trans/9-cis/11-cis)
ILMN_23892	0.197403	0.0109	3.27058	-3.28675	0.560996	ASCL1	achaete-scute family bHLH transcription factor 1
ILMN_13999	0.197403	0.0109	-3.26965	-3.28821	-0.758448	PIR	pirin
ILMN_10186	0.197403	0.0109	-3.26858	-3.2899	-0.609207	CCDC124	coiled-coil domain containing 124
ILMN_28538	0.197403	0.0109	3.26841	-3.29016	0.681793	CLDN16	claudin 16
ILMN_7008	0.197403	0.0109	-3.26838	-3.29021	-0.536616	ZNF431	zinc finger protein 431
ILMN_2961	0.197609	0.011	-3.26712	-3.29219	-0.776953	TMEM134	transmembrane protein 134
ILMN_18096	0.197613	0.011	-3.26653	-3.29312	-0.80335	COL22A1	collagen type XXII alpha 1 chain
ILMN_1914	0.197782	0.011	3.26539	-3.29491	0.659258	DGKA	diacylglycerol kinase alpha
ILMN_2508	0.198726	0.0111	-3.26169	-3.30073	-0.722239	MRPS18A	mitochondrial ribosomal protein S18A
ILMN_15462	0.198746	0.0111	-3.2608	-3.30211	-0.584235	PIFO	primary cilia formation
ILMN_9164	0.186906	0.00968	-3.34991	-3.16242	-1.41715	WDR86	WD repeat domain 86
ILMN_11310	0.199192	0.0111	-3.25843	-3.30585	-0.51767	BICD2	BICD cargo adaptor 2
ILMN_5406	0.19947	0.0111	-3.25694	-3.30819	-0.603134	AHDC1	AT-hook DNA binding motif containing 1
ILMN_13019	0.199923	0.0112	3.25467	-3.31174	0.699804	CNIH1	cornichon family AMPA receptor auxiliary protein 1
ILMN_7911	0.199923	0.0112	3.25413	-3.31259	0.54324	CUL3	cullin 3
ILMN_17648	0.199923	0.0112	3.25373	-3.31322	0.493203	LZIC	leucine zipper and CTNNBIP1 domain containing
ILMN_23853	0.20006	0.0112	-3.25271	-3.31482	-0.560061	VWA7	von Willebrand factor A domain containing 7
ILMN_20719	0.200162	0.0112	3.25181	-3.31625	0.796151	AGR3	anterior gradient 3, protein disulphide isomerase family member
ILMN_18057	0.200464	0.0113	3.24938	-3.32006	0.699558	CYP7A1	cytochrome P450 family 7 subfamily A member 1
ILMN_20214	0.200464	0.0113	3.24931	-3.32017	0.819905	IL13RA2	interleukin 13 receptor subunit alpha 2
ILMN_16442	0.200464	0.0113	-3.24911	-3.32048	-0.670473	SLC9A7	solute carrier family 9 member A7
ILMN_11388	0.200964	0.0113	-3.24659	-3.32445	-0.833954	UNC5A	unc-5 netrin receptor A
ILMN_18125	0.200964	0.0113	-3.24634	-3.32484	-0.524478	ZNF532	zinc finger protein 532
ILMN_26039	0.201311	0.0114	3.24464	-3.32751	0.968486	SSX7	SSX family member 7
ILMN_19002	0.201442	0.0114	3.24365	-3.32907	0.722977	DPYD	dihydropyrimidine dehydrogenase
ILMN_5307	0.201793	0.0114	-3.24194	-3.33176	-0.507695	AKAP10	A-kinase anchoring protein 10
ILMN_12478	0.244911	0.017	-2.9823	-3.74185	-1.41913	MSMB	microseminoprotein beta
ILMN_16128	0.202588	0.0115	-3.23801	-3.33794	-0.86708	FASN	fatty acid synthase
ILMN_18248	0.202588	0.0115	3.23767	-3.33848	0.517063	C15orf41	chromosome 15 open reading frame 41
ILMN_23214	0.202871	0.0115	3.23619	-3.3408	0.859189	PRUNE2	prune homolog 2
ILMN_3039	0.203014	0.0115	-3.23513	-3.34247	-0.516283	KHSRP	KH-type splicing regulatory protein
ILMN_16546	0.044215	0.000926	-5.03416	-0.69665	-1.41997	HSPA5	heat shock protein family A (Hsp70) member 5
ILMN_5032	0.0205313	0.000313	-5.93022	0.45144	-1.42011	FAM20A	family with sequence similarity 20 member A
ILMN_26699	0.203282	0.0116	-3.23204	-3.34733	-0.606586	NRG4	neuregulin 4
ILMN_6691	0.203282	0.0116	-3.23141	-3.34832	-0.732745	TYRO3	TYRO3 protein tyrosine kinase
ILMN_26601	0.203282	0.0116	-3.2312	-3.34865	-0.643807	ESRRB	estrogen related receptor beta
ILMN_14767	0.286346	0.0236	-2.77232	-4.07499	-1.42099	SCUBE2	signal peptide, CUB domain and EGF like domain containing 2
ILMN_19967	0.203451	0.0116	-3.22983	-3.3508	-0.654502	NUFIP2	NUFIP2, FMR1 interacting protein 2
ILMN_3066	0.203475	0.0117	-3.22364	-3.36054	-1.42158	IGFBP5	insulin like growth factor binding protein 5
ILMN_8354	0.203475	0.0116	-3.22787	-3.35389	-0.78176	CDC20	cell division cycle 20
ILMN_29392	0.203475	0.0117	3.22731	-3.35477	0.838242	CNN1	calponin 1
ILMN_5600	0.203475	0.0117	-3.22727	-3.35483	-0.597979	FEZF2	FEZ family zinc finger 2
ILMN_2208	0.203475	0.0117	-3.22668	-3.35576	-0.911848	OR8B2	olfactory receptor family 8 subfamily B member 2
ILMN_27776	0.203475	0.0117	3.22538	-3.3578	0.622884	PLBD1	phospholipase B domain containing 1
ILMN_6956	0.0421627	0.00086	-5.09209	-0.61889	-1.42167	SLC4A2	solute carrier family 4 member 2
ILMN_17605	0.203475	0.0117	3.22438	-3.35939	0.492463	IDS	iduronate 2-sulfatase
ILMN_17040	0.203475	0.0117	3.22371	-3.36043	0.953895	DAPL1	death associated protein like 1
ILMN_9715	0.203475	0.0117	3.2237	-3.36045	0.577999	KLC4	kinesin light chain 4
ILMN_2909	0.0161739	0.000221	-6.23957	0.82145	-1.42296	GPRC5C	G protein-coupled receptor class C group 5 member C
ILMN_1823	0.203478	0.0117	3.22308	-3.36143	0.976575	2020-03-04	membrane associated ring-CH-type finger 4
ILMN_12922	0.203633	0.0117	-3.22203	-3.36308	-0.530122	SNAI3	snail family transcriptional repressor 3
ILMN_9632	0.2038	0.0118	3.22094	-3.3648	0.973773	GGT6	gamma-glutamyltransferase 6
ILMN_21418	0.20449	0.0118	3.21768	-3.36992	0.866521	THOP1	thimet oligopeptidase 1
ILMN_667	0.20449	0.0118	-3.21762	-3.37002	-0.776593	LGALS9	galectin 9
ILMN_4018	0.204675	0.0118	3.21648	-3.37182	0.568291	CAMK2G	calcium/calmodulin dependent protein kinase II gamma
ILMN_20319	0.205155	0.0119	-3.21439	-3.3751	-0.622842	GREB1	growth regulation by estrogen in breast cancer 1
ILMN_21524	0.205509	0.0119	3.21271	-3.37774	0.626629
ILMN_27041	0.205961	0.012	3.21073	-3.38087	0.742517	BPHL	biphenyl hydrolase like
ILMN_24301	0.206888	0.012	-3.20723	-3.38636	-0.49646	TRIML2	tripartite motif family like 2
ILMN_4202	0.207312	0.0121	-3.20534	-3.38934	-0.866882	DMD	dystrophin
ILMN_4382	0.20799	0.0121	3.20266	-3.39357	0.575267	GNA13	G protein subunit alpha 13
ILMN_15550	0.208227	0.0121	-3.20137	-3.3956	-0.498873	HDDC2	HD domain containing 2
ILMN_21605	0.208282	0.0121	3.20065	-3.39673	0.53506	P3H4	prolyl 3-hydroxylase family member 4 (non-enzymatic)
ILMN_16132	0.208373	0.0122	-3.1993	-3.39885	-0.512109	CELSR2	cadherin EGF LAG seven-pass G-type receptor 2
ILMN_17155	0.208373	0.0122	-3.19927	-3.3989	-0.499836	ATP2A1	ATPase sarcoplasmic/endoplasmic reticulum Ca2+ transporting 1
ILMN_8015	0.0278578	0.000468	-5.58705	0.0254	-1.42537	SMARCD3	SWI/SNF related, matrix associated, actin dependent regulator of chromatin, subfamily d, member 3
ILMN_17888	0.209363	0.0122	3.19508	-3.4055	0.543489	FAM171A1	family with sequence similarity 171 member A1
ILMN_24051	0.210251	0.0123	-3.19177	-3.41072	-0.667427	DENND5A	DENN domain containing 5A
ILMN_6623	0.299259	0.0257	-2.71678	-4.1631	-1.43319	HSPA1A	heat shock protein family A (Hsp70) member 1A
ILMN_7647	0.211937	0.0124	-3.18546	-3.42067	-0.737649
ILMN_24699	0.213425	0.0125	-3.18034	-3.42873	-0.550868	GPR137	G protein-coupled receptor 137
ILMN_23061	0.213684	0.0125	-3.17901	-3.43083	-0.693523	GPRC5B	G protein-coupled receptor class C group 5 member B
ILMN_3614	0.214417	0.0126	-3.17623	-3.43521	-0.798145	C14orf37	chromosome 14 open reading frame 37
ILMN_5029	0.16225	0.00737	-3.53135	-2.88003	-1.43738	CBS	cystathionine-beta-synthase
ILMN_11030	0.214997	0.0127	3.17338	-3.4397	0.587007	ODF2L	outer dense fiber of sperm tails 2 like
ILMN_28424	0.215259	0.0127	3.17205	-3.4418	0.674378	GAL3ST1	galactose-3-O-sulfotransferase 1
ILMN_9084	0.215608	0.0127	3.17045	-3.44432	0.694981	SH3D19	SH3 domain containing 19
ILMN_18905	0.216288	0.0128	3.16758	-3.44886	0.526794	CADPS	calcium dependent secretion activator
ILMN_14927	0.216288	0.0128	3.16732	-3.44926	0.516053	CASC4	cancer susceptibility candidate 4
ILMN_27265	0.299115	0.0256	-2.71967	-4.15852	-1.44903	CHURC1	churchill domain containing 1
ILMN_29250	0.21631	0.0128	3.1656	-3.45197	0.559151	BPNT1	3'(2'), 5'-bisphosphate nucleotidase 1
ILMN_2456	0.21631	0.0128	3.16506	-3.45283	0.588477	ATF1	activating transcription factor 1
ILMN_21506	0.21631	0.0128	-3.16487	-3.45312	-0.506539	UGGT2	UDP-glucose glycoprotein glucosyltransferase 2
ILMN_29022	0.21631	0.0128	-3.16378	-3.45484	-0.597683	CERS4	ceramide synthase 4
ILMN_11980	0.21631	0.0128	3.1636	-3.45512	0.546949	OR4F17	olfactory receptor family 4 subfamily F member 17
ILMN_27483	0.21631	0.0128	-3.16351	-3.45528	-0.573053	DSTYK	dual serine/threonine and tyrosine protein kinase
ILMN_5796	0.216388	0.0129	-3.16186	-3.45787	-0.539725	LMO4	LIM domain only 4
ILMN_570	0.216388	0.0129	-3.16175	-3.45805	-0.709311	CEP152	centrosomal protein 152
ILMN_11666	0.216388	0.0129	-3.16091	-3.45937	-0.503086	ACKR2	atypical chemokine receptor 2
ILMN_20458	0.216388	0.0129	3.16085	-3.45947	0.900151	PCSK2	proprotein convertase subtilisin/kexin type 2
ILMN_5938	0.216388	0.0129	-3.1603	-3.46033	-0.494721	PPFIBP2	PPFIA binding protein 2
ILMN_796	0.122649	0.00429	-3.90208	-2.3136	-1.46019	CA12	carbonic anhydrase 12
ILMN_26267	0.216645	0.0129	-3.15877	-3.46275	-0.931179	C6	complement component 6
ILMN_17889	0.217151	0.013	3.15671	-3.46599	0.509946	PPP1R2	protein phosphatase 1 regulatory inhibitor subunit 2
ILMN_22221	0.294549	0.0249	-2.73766	-4.12998	-1.47205	PNPLA7	patatin like phospholipase domain containing 7
ILMN_19900	0.217313	0.013	3.15397	-3.47031	0.87071	ZNF608	zinc finger protein 608
ILMN_13405	0.060316	0.00148	-4.67278	-1.19285	-1.47382	RAP1GAP	RAP1 GTPase activating protein
ILMN_26435	0.217313	0.0131	-3.15263	-3.47244	-0.725154	GCN1	GCN1, eIF2 alpha kinase activator homolog
ILMN_25544	0.217313	0.0131	3.15231	-3.47293	0.577341	KDM3A	lysine demethylase 3A
ILMN_23393	0.217313	0.0131	-3.15229	-3.47296	-0.579111	N4BP1	NEDD4 binding protein 1
ILMN_27029	0.217313	0.0131	3.15214	-3.47321	0.964538	CEBPA	CCAAT/enhancer binding protein alpha
ILMN_20106	0.217313	0.0131	3.152	-3.47342	0.647085	PGM1	phosphoglucomutase 1
ILMN_1790	0.217689	0.0131	3.15035	-3.47603	0.653842	ADAP1	ArfGAP with dual PH domains 1
ILMN_22540	0.218392	0.0132	-3.14772	-3.48019	-0.605585	NXN	nucleoredoxin
ILMN_25234	0.218573	0.0132	-3.14665	-3.48187	-0.752119	RAB3IL1	RAB3A interacting protein like 1
ILMN_137859	0.218916	0.0132	-3.14464	-3.48504	-0.581088	PLPPR5	phospholipid phosphatase related 5
ILMN_29880	0.218916	0.0132	3.14458	-3.48514	0.52421	RARA	retinoic acid receptor alpha
ILMN_18942	0.218976	0.0132	-3.14388	-3.48624	-0.659063	RWDD2A	RWD domain containing 2A
ILMN_13171	0.286759	0.0237	-2.76952	-4.07944	-1.47679	CXCL13	C-X-C motif chemokine ligand 13
ILMN_16309	0.219822	0.0133	-3.14032	-3.49186	-0.566301	TMEM136	transmembrane protein 136
ILMN_13496	0.220093	0.0134	-3.13696	-3.49716	-0.660633	BDP1	B double prime 1, subunit of RNA polymerase III transcription initiation factor IIIB
ILMN_26918	0.220093	0.0134	3.13695	-3.49718	0.843678
ILMN_20241	0.220706	0.0135	-3.12939	-3.50911	-1.48704	LEPR	leptin receptor
ILMN_2593	0.220093	0.0134	-3.13665	-3.49765	-0.74375	FUT7	fucosyltransferase 7
ILMN_23324	0.220093	0.0134	3.13613	-3.49847	0.560032	SLC18A1	solute carrier family 18 member A1
ILMN_21894	0.220093	0.0134	-3.1361	-3.49851	-0.65308	L3MBTL4	l(3)mbt-like 4 (Drosophila)
ILMN_26272	0.220093	0.0134	3.13586	-3.4989	0.659114	SNX7	sorting nexin 7
ILMN_17499	0.220298	0.0134	3.1345	-3.50105	0.629046	KLF5	Kruppel like factor 5
ILMN_16027	0.220298	0.0134	-3.13422	-3.50149	-0.503724	METTL4	methyltransferase like 4
ILMN_5259	0.220341	0.0135	3.13313	-3.5032	0.928516	ABLIM2	actin binding LIM protein family member 2
ILMN_3667	0.220341	0.0135	3.13261	-3.50404	0.536163	MYT1	myelin transcription factor 1
ILMN_23316	0.220341	0.0135	3.13253	-3.50415	0.849784	CLDN4	claudin 4
ILMN_23686	0.220346	0.0135	-3.132	-3.50499	-0.941472	KLF15	Kruppel like factor 15
ILMN_3922	0.220555	0.0135	3.13082	-3.50685	0.542584	C14orf105	chromosome 14 open reading frame 105
ILMN_22805	0.0920945	0.00283	-4.19518	-1.87771	-1.49663	SLC26A7	solute carrier family 26 member 7
ILMN_25672	0.0634228	0.0016	-4.61583	-1.27279	-1.5146	KLK11	kallikrein related peptidase 11
ILMN_15012	0.223009	0.0137	3.12211	-3.5206	0.783813	FAIM	Fas apoptotic inhibitory molecule
ILMN_2544	0.090254	0.00272	-4.22459	-1.83461	-1.51481	KCTD8	potassium channel tetramerization domain containing 8
ILMN_19470	0.223376	0.0137	3.12001	-3.52392	0.521856	RFK	riboflavin kinase
ILMN_29769	0.223887	0.0138	-3.11801	-3.52708	-0.748524	IGF2R	insulin like growth factor 2 receptor
ILMN_29563	0.223981	0.0138	-3.11723	-3.52832	-0.511162	SPAG7	sperm associated antigen 7
ILMN_14324	0.224002	0.0138	-3.11665	-3.52924	-0.832434	ENOX2	ecto-NOX disulfide-thiol exchanger 2
ILMN_3320	0.224545	0.0139	-3.1138	-3.53373	-0.661196	NIN	ninein
ILMN_26525	0.224545	0.0139	-3.11333	-3.53447	-0.769868	MPP7	membrane palmitoylated protein 7
ILMN_23191	0.224545	0.0139	3.11305	-3.53492	0.743157	IFNAR2	interferon alpha and beta receptor subunit 2
ILMN_21843	0.224545	0.0139	-3.11303	-3.53496	-0.636831	RNF41	ring finger protein 41
ILMN_10960	0.224743	0.0139	-3.11173	-3.53701	-0.489958	CREB3	cAMP responsive element binding protein 3
ILMN_18431	0.224743	0.0139	-3.11143	-3.53748	-0.671073	POLE	DNA polymerase epsilon, catalytic subunit
ILMN_2275	0.224881	0.0139	3.11028	-3.5393	0.495261
ILMN_9535	0.0905497	0.00275	-4.21646	-1.84651	-1.51498	WASF3	WAS protein family member 3
ILMN_1150	0.224881	0.014	-3.109	-3.54132	-0.564161	FANCB	Fanconi anemia complementation group B
ILMN_18132	0.224881	0.014	-3.10823	-3.54254	-0.479025	FKBP14	FK506 binding protein 14
ILMN_24443	0.224881	0.014	-3.10804	-3.54284	-0.767518	CAPN2	calpain 2
ILMN_21581	0.0580635	0.00138	-4.72592	-1.11869	-1.51961	RIMS3	regulating synaptic membrane exocytosis 3
ILMN_28435	0.224907	0.014	-3.10674	-3.54489	-0.482263	FRMD4A	FERM domain containing 4A
ILMN_15557	0.224907	0.014	-3.10661	-3.5451	-0.782491	ANKRD50	ankyrin repeat domain 50
ILMN_17915	0.224907	0.014	3.10638	-3.54546	0.48289	SLC35D2	solute carrier family 35 member D2
ILMN_2937	0.069428	0.00187	-4.49827	-1.43931	-1.53018	HOMER2	homer scaffolding protein 2
ILMN_137591	0.225519	0.0141	-3.1036	-3.54985	-0.634952	STAU1	staufen double-stranded RNA binding protein 1
ILMN_23563	0.225612	0.0141	-3.10264	-3.55136	-0.678046	SLC25A31	solute carrier family 25 member 31
ILMN_18639	0.225612	0.0141	-3.10232	-3.55187	-0.761107	MBNL3	muscleblind like splicing regulator 3
ILMN_24073	0.226326	0.0142	-3.09976	-3.55592	-0.554038	PNKP	polynucleotide kinase 3'-phosphatase
ILMN_25541	0.226726	0.0142	3.09811	-3.55853	0.567936	ZNF394	zinc finger protein 394
ILMN_11687	0.227675	0.0143	-3.09433	-3.5645	-0.907594	PREX2	phosphatidylinositol-3,4,5-trisphosphate dependent Rac exchange factor 2
ILMN_7493	0.227675	0.0143	-3.0941	-3.56487	-0.581109	OR5AK2	olfactory receptor family 5 subfamily AK member 2
ILMN_27026	0.227675	0.0143	3.09388	-3.56521	0.516344	TMEM141	transmembrane protein 141
ILMN_22082	0.22797	0.0143	-3.09254	-3.56733	-0.84419	FBN2	fibrillin 2
ILMN_6405	0.130248	0.00482	-3.82025	-2.43726	-1.54326	REC8	REC8 meiotic recombination protein
ILMN_20526	0.228183	0.0144	3.09093	-3.56988	0.648719	GIMAP2	GTPase, IMAP family member 2
ILMN_18525	0.228258	0.0144	3.09004	-3.57128	0.978423
ILMN_11990	0.228258	0.0144	-3.08951	-3.57213	-0.88021	NPY	neuropeptide Y
ILMN_26042	0.104379	0.00338	-4.06869	-2.06444	-1.54641	XYLT2	xylosyltransferase 2
ILMN_11903	0.0742566	0.00206	-4.42763	-1.54033	-1.57143	ZBTB16	zinc finger and BTB domain containing 16
ILMN_2919	0.228258	0.0144	-3.08795	-3.57458	-0.793057	SYTL3	synaptotagmin like 3
ILMN_565	0.228258	0.0144	-3.08738	-3.57548	-0.99345	TJAP1	tight junction associated protein 1
ILMN_26252	0.228258	0.0144	3.08721	-3.57575	0.776795	TRAM2	translocation associated membrane protein 2
ILMN_28519	0.228429	0.0145	-3.08623	-3.57731	-0.786589	PIAS3	protein inhibitor of activated STAT 3
ILMN_9788	0.228541	0.0145	-3.08512	-3.57906	-0.650547	TRAF5	TNF receptor associated factor 5
ILMN_13838	0.228541	0.0145	-3.08483	-3.57953	-0.578262	ISM2	isthmin 2
ILMN_11136	0.126893	0.00458	-3.85634	-2.38263	-1.57326	PTGER3	prostaglandin E receptor 3
ILMN_20755	0.089758	0.00269	-4.23321	-1.822	-1.58409	RAB11FIP2	RAB11 family interacting protein 2
ILMN_28822	0.229113	0.0146	-3.08171	-3.58445	-0.801647	MANF	mesencephalic astrocyte derived neurotrophic factor
ILMN_4591	0.00871959	9.32e-05	-7.05094	1.73209	-1.60695	EIF5A2	eukaryotic translation initiation factor 5A2
ILMN_20028	0.138589	0.0056	-3.71778	-2.59325	-1.6071	GAMT	guanidinoacetate N-methyltransferase
ILMN_22337	0.229113	0.0146	-3.07937	-3.58816	-0.736653	UBE2U	ubiquitin conjugating enzyme E2 U (putative)
ILMN_10145	0.229113	0.0146	3.07899	-3.58876	0.51971	SLC35A3	solute carrier family 35 member A3
ILMN_24005	0.229113	0.0146	-3.0788	-3.58906	-0.680079	SOSTDC1	sclerostin domain containing 1
ILMN_13404	0.229113	0.0147	-3.07799	-3.59034	-0.678938	TNFRSF9	TNF receptor superfamily member 9
ILMN_9221	0.229113	0.0147	-3.0777	-3.5908	-0.70955	CDC42EP1	CDC42 effector protein 1
ILMN_20722	0.229113	0.0147	-3.07744	-3.59121	-0.673311	MX2	MX dynamin like GTPase 2
ILMN_6606	0.229113	0.0147	-3.07735	-3.59134	-0.80994	CA4	carbonic anhydrase 4
ILMN_20999	0.22954	0.0147	3.07565	-3.59403	0.808756	TSPAN12	tetraspanin 12
ILMN_18408	0.229763	0.0147	3.07453	-3.59581	0.628285	LGALS4	galectin 4
ILMN_11640	0.229982	0.0148	-3.07342	-3.59757	-0.508879	SLC2A4RG	SLC2A4 regulator
ILMN_18883	0.0529757	0.00123	-4.81499	-0.9953	-1.60994	ACADL	acyl-CoA dehydrogenase, long chain
ILMN_13015	0.230183	0.0148	-3.07187	-3.60002	-0.487954	TPD52L1	tumor protein D52-like 1
ILMN_20834	0.23064	0.0148	-3.07009	-3.60283	-0.4915	CXXC1	CXXC finger protein 1
ILMN_16774	0.231926	0.0149	-3.06558	-3.60996	-0.582236	FAM111B	family with sequence similarity 111 member B
ILMN_13445	0.231926	0.0149	3.06542	-3.61022	0.498399	F11	coagulation factor XI
ILMN_24480	0.231926	0.0149	-3.06502	-3.61086	-0.656023	SDC4	syndecan 4
ILMN_1073	0.232212	0.015	-3.06373	-3.6129	-0.627594	MSTO1	misato 1, mitochondrial distribution and morphology regulator
ILMN_29163	0.232473	0.015	3.06241	-3.61499	0.810426	ADAMTSL5	ADAMTS like 5
ILMN_17770	0.232473	0.015	-3.06195	-3.61571	-0.600975	KLHL22	kelch like family member 22
ILMN_13953	0.232473	0.015	3.06123	-3.61685	0.507021	LCOR	ligand dependent nuclear receptor corepressor
ILMN_6495	0.232473	0.0151	3.06055	-3.61793	0.636831	TNFRSF11B	TNF receptor superfamily member 11b
ILMN_23147	0.271071	0.0212	-2.83833	-3.97024	-1.61674	SLC26A7	solute carrier family 26 member 7
ILMN_441	0.232473	0.0151	-3.05975	-3.61919	-0.614063
ILMN_3868	0.232473	0.0151	3.05959	-3.61944	0.562246	BCL2	BCL2, apoptosis regulator
ILMN_7678	0.232592	0.0151	3.05803	-3.62192	0.601533	HENMT1	HEN1 methyltransferase homolog 1
ILMN_10819	0.192993	0.0104	-3.30199	-3.23746	-1.61724	CGNL1	cingulin like 1
ILMN_8842	0.232592	0.0151	3.0578	-3.62227	0.516108	ROS1	ROS proto-oncogene 1, receptor tyrosine kinase
ILMN_22372	0.233409	0.0152	-3.05504	-3.62664	-0.541832	ZNF43	zinc finger protein 43
ILMN_26723	0.233676	0.0152	3.05382	-3.62858	0.766859	APOC2	apolipoprotein C2
ILMN_21201	0.234465	0.0153	3.05115	-3.6328	0.72165	CMAS	cytidine monophosphate N-acetylneuraminic acid synthetase
ILMN_29504	0.234607	0.0153	-3.05028	-3.63418	-0.538117	NDUFB11	NADH:ubiquinone oxidoreductase subunit B11
ILMN_3106	0.386962	0.0489	-2.30825	-4.806	-1.6219	SLC26A9	solute carrier family 26 member 9
ILMN_1964	0.234864	0.0153	-3.04855	-3.63692	-0.509867	PACSIN1	protein kinase C and casein kinase substrate in neurons 1
ILMN_16641	0.234864	0.0154	3.04749	-3.63859	0.476106	C19orf45	chromosome 19 open reading frame 45
ILMN_27274	0.234864	0.0154	3.04734	-3.63883	0.52121	MEX3D	mex-3 RNA binding family member D
ILMN_15732	0.234864	0.0154	-3.04716	-3.63912	-0.615163	COL15A1	collagen type XV alpha 1 chain
ILMN_24226	0.235381	0.0154	3.04514	-3.6423	0.53049	PTPRE	protein tyrosine phosphatase, receptor type E
ILMN_25955	0.235381	0.0154	3.04477	-3.6429	0.904603	UNC93A	unc-93 homolog A (C. elegans)
ILMN_22425	0.235838	0.0155	-3.04303	-3.64565	-0.665725	RNF112	ring finger protein 112
ILMN_3636	0.236024	0.0155	-3.04153	-3.64803	-0.539651	TNNC1	troponin C1, slow skeletal and cardiac type
ILMN_4420	0.0293568	0.000506	-5.52193	-0.05733	-1.62657
ILMN_1146	0.236024	0.0155	3.04064	-3.64943	0.511958
ILMN_15979	0.236024	0.0155	3.04061	-3.64949	0.720489	ATP2B1	ATPase plasma membrane Ca2+ transporting 1
ILMN_10044	0.236198	0.0155	3.03948	-3.65127	0.538133	LXN	latexin
ILMN_7393	0.236198	0.0156	-3.03917	-3.65176	-0.556352	EWSR1	EWS RNA binding protein 1
ILMN_888	0.236297	0.0156	-3.03826	-3.65321	-0.912502	RAG2	recombination activating gene 2
ILMN_2889	0.236297	0.0156	-3.03795	-3.6537	-0.481354	KRTAP19-7	keratin associated protein 19-7
ILMN_23425	0.237298	0.0157	3.03473	-3.65879	0.709713	ANXA4	annexin A4
ILMN_22999	0.237942	0.0157	3.03227	-3.66269	0.599564	SLC28A3	solute carrier family 28 member 3
ILMN_24359	0.237942	0.0157	-3.03202	-3.66308	-0.721087	COL4A1	collagen type IV alpha 1 chain
ILMN_138474	0.237995	0.0157	3.03131	-3.66421	0.548631	PRR34	proline rich 34
ILMN_21816	0.237995	0.0158	3.03093	-3.66481	0.519298	OR14I1	olfactory receptor family 14 subfamily I member 1
ILMN_21965	0.237995	0.0158	3.02964	-3.66685	0.630647
ILMN_6197	0.237995	0.0158	-3.02937	-3.66728	-0.616513	ZNF418	zinc finger protein 418
ILMN_27345	0.182751	0.00922	-3.38171	-3.11272	-1.62826	SMIM11A	small integral membrane protein 11A
ILMN_18804	0.237995	0.0158	3.02816	-3.6692	0.634165	DDO	D-aspartate oxidase
ILMN_17250	0.237995	0.0158	-3.02785	-3.66968	-0.888136	SLC1A3	solute carrier family 1 member 3
ILMN_3303	0.237995	0.0158	3.02769	-3.66994	0.715104	IDH3A	isocitrate dehydrogenase 3 (NAD(+)) alpha
ILMN_21238	0.237995	0.0158	-3.02761	-3.67006	-0.516061	LINC01567	long intergenic non-protein coding RNA 1567
ILMN_15144	0.238312	0.0159	3.02593	-3.67273	0.551121
ILMN_4354	0.270471	0.021	-2.846	-3.95806	-1.64454	IRX3	iroquois homeobox 3
ILMN_9494	0.238619	0.0159	-3.02432	-3.67527	-0.765225	OR10R2	olfactory receptor family 10 subfamily R member 2
ILMN_17460	0.238619	0.0159	-3.02403	-3.67573	-0.622076	PSAT1	phosphoserine aminotransferase 1
ILMN_8353	0.238791	0.0159	-3.0231	-3.67721	-0.503716	MPDZ	multiple PDZ domain crumbs cell polarity complex component
ILMN_7702	0.239339	0.016	-3.02114	-3.68031	-0.50382	KDR	kinase insert domain receptor
ILMN_26797	0.239567	0.016	3.02006	-3.68203	0.489849	ALDH3B1	aldehyde dehydrogenase 3 family member B1
ILMN_14825	0.23966	0.016	-3.01933	-3.68317	-0.485425	HGS	hepatocyte growth factor-regulated tyrosine kinase substrate
ILMN_5806	0.239855	0.0161	-3.01834	-3.68475	-0.657438	CMTM4	CKLF like MARVEL transmembrane domain containing 4
ILMN_2046	0.239872	0.0161	-3.01768	-3.68579	-0.742622	CNTNAP4	contactin associated protein like 4
ILMN_11466	0.239872	0.0161	-3.01736	-3.6863	-0.605652	AAK1	AP2 associated kinase 1
ILMN_29747	0.239889	0.0161	-3.01682	-3.68715	-0.650571	PPIP5K2	diphosphoinositol pentakisphosphate kinase 2
ILMN_28965	0.239889	0.0161	3.01638	-3.68786	0.980444	SULT1A1	sulfotransferase family 1A member 1
ILMN_13298	0.23992	0.0161	-3.01505	-3.68996	-0.478741	NAT10	N-acetyltransferase 10
ILMN_18962	0.23992	0.0161	-3.01494	-3.69012	-0.646717	DERL2	derlin 2
ILMN_20119	0.23992	0.0162	3.01435	-3.69106	0.951144	RDH5	retinol dehydrogenase 5
ILMN_20006	0.23992	0.0162	-3.01435	-3.69106	-0.477068	POU4F2	POU class 4 homeobox 2
ILMN_15975	0.23992	0.0162	-3.01396	-3.69169	-0.993167	AKAP13	A-kinase anchoring protein 13
ILMN_10118	0.239946	0.0162	3.01337	-3.69261	0.567515	TBL1XR1	transducin (beta)-like 1 X-linked receptor 1
ILMN_17583	0.239946	0.0162	3.01249	-3.69401	0.54426	TSGA10	testis specific 10
ILMN_8864	0.239946	0.0162	-3.01249	-3.69401	-0.756413	POLA2	DNA polymerase alpha 2, accessory subunit
ILMN_14136	0.240058	0.0162	-3.01162	-3.6954	-0.464831	PNLDC1	PARN like, ribonuclease domain containing 1
ILMN_18486	0.240058	0.0163	-3.0108	-3.69669	-0.52656	DSEL	dermatan sulfate epimerase-like
ILMN_16748	0.240058	0.0163	-3.01079	-3.6967	-0.625723	DDIT3	DNA damage inducible transcript 3
ILMN_1717	0.240128	0.0163	-3.01014	-3.69773	-0.583237	C2orf49	chromosome 2 open reading frame 49
ILMN_12859	0.24036	0.0163	-3.00906	-3.69945	-0.945733	POP5	POP5 homolog, ribonuclease P/MRP subunit
ILMN_6496	0.240468	0.0163	-3.0083	-3.70065	-0.458127	ADGRD1	adhesion G protein-coupled receptor D1
ILMN_5181	0.241395	0.0164	-3.00529	-3.70541	-0.468527	VEGFA	vascular endothelial growth factor A
ILMN_19053	0.241395	0.0164	3.00452	-3.70664	0.756132	KIAA0226L	KIAA0226 like
ILMN_6394	0.241395	0.0164	-3.00405	-3.70738	-0.976235
ILMN_16989	0.241395	0.0164	-3.00397	-3.70751	-0.559953
ILMN_11049	0.241985	0.0165	-3.00193	-3.71074	-0.517085	EXOSC2	exosome component 2
ILMN_10232	0.242125	0.0165	-3.00109	-3.71207	-0.56182	FCHSD2	FCH and double SH3 domains 2
ILMN_27787	0.242858	0.0166	-2.99836	-3.7164	-0.545718	SORD	sorbitol dehydrogenase
ILMN_27777	0.242858	0.0166	-2.99689	-3.71872	-0.886141	TMEM97	transmembrane protein 97
ILMN_2244	0.242858	0.0166	2.99661	-3.71918	0.693735	SEPHS2	selenophosphate synthetase 2
ILMN_4623	0.242858	0.0166	-2.99642	-3.71947	-0.663095	MYEOV	myeloma overexpressed
ILMN_5663	0.242858	0.0166	-2.99576	-3.72052	-0.481951	RRAGD	Ras related GTP binding D
ILMN_27032	0.242858	0.0166	-2.9957	-3.72061	-0.50971	LEPROT	leptin receptor overlapping transcript
ILMN_10512	0.242858	0.0166	-2.99566	-3.72067	-0.444927	EDA	ectodysplasin A
ILMN_28962	0.242858	0.0167	-2.99508	-3.7216	-0.889245	BASP1	brain abundant membrane attached signal protein 1
ILMN_18888	0.242858	0.0167	2.99501	-3.72171	0.645221	SSX2IP	SSX family member 2 interacting protein
ILMN_21453	0.0742575	0.00207	-4.42323	-1.54665	-1.65586	IL33	interleukin 33
ILMN_4735	0.243316	0.0167	-2.99251	-3.72567	-0.737036	OASL	2'-5'-oligoadenylate synthetase like
ILMN_23211	0.243316	0.0167	2.99242	-3.7258	0.813823	PDK4	pyruvate dehydrogenase kinase 4
ILMN_24560	0.243927	0.0168	-2.99035	-3.72909	-0.605346	NCEH1	neutral cholesterol ester hydrolase 1
ILMN_6635	0.243934	0.0168	2.98987	-3.72985	0.894724	ARNTL	aryl hydrocarbon receptor nuclear translocator like
ILMN_12966	0.0346684	0.000647	-5.32081	-0.31672	-1.65856	GHR	growth hormone receptor
ILMN_4770	0.244073	0.0168	2.98859	-3.73187	0.745425	GAD1	glutamate decarboxylase 1
ILMN_27923	0.244911	0.0169	2.98539	-3.73696	0.736237	IL31	interleukin 31
ILMN_16818	0.244911	0.0169	2.98493	-3.73767	0.826841	OLIG2	oligodendrocyte lineage transcription factor 2
ILMN_3201	0.244911	0.0169	2.98481	-3.73787	0.618645	ACOT7	acyl-CoA thioesterase 7
ILMN_25749	0.244911	0.0169	2.98414	-3.73893	0.549344	GNA11	G protein subunit alpha 11
ILMN_28730	0.244911	0.0169	-2.9837	-3.73963	-0.624922	PRKDC	protein kinase, DNA-activated, catalytic polypeptide
ILMN_28582	0.250418	0.0176	-2.95854	-3.77952	-1.66908	SPRR2F	small proline rich protein 2F
ILMN_28415	0.244911	0.017	-2.98319	-3.74043	-0.464883	STEAP3	STEAP3 metalloreductase
ILMN_14897	0.244911	0.017	-2.98247	-3.74158	-0.525036	PUF60	poly(U) binding splicing factor 60
ILMN_9257	0.211644	0.0124	-3.1869	-3.41839	-1.68763	THAP10	THAP domain containing 10
ILMN_20010	0.245168	0.017	2.98117	-3.74364	0.680729	ASS1	argininosuccinate synthase 1
ILMN_1802	0.245318	0.017	2.98032	-3.74498	0.729466	DLL1	delta like canonical Notch ligand 1
ILMN_138988	0.245431	0.0171	2.97958	-3.74616	0.744751	SLC25A37	solute carrier family 25 member 37
ILMN_26045	0.24587	0.0171	2.97797	-3.74871	0.485673	GLYATL2	glycine-N-acyltransferase like 2
ILMN_22391	0.245953	0.0171	2.9773	-3.74977	0.709667	LDHA	lactate dehydrogenase A
ILMN_5788	0.246636	0.0172	-2.97498	-3.75345	-0.470376	SEMA4F	ssemaphorin 4F
ILMN_137031	0.246636	0.0172	2.97461	-3.75403	0.658815	SRD5A1	steroid 5 alpha-reductase 1
ILMN_9456	0.246805	0.0172	-2.97372	-3.75544	-0.890755	PRRX2	paired related homeobox 2
ILMN_28173	0.24767	0.0173	-2.97049	-3.76056	-0.54245	GNPTG	N-acetylglucosamine-1-phosphate transferase gamma subunit
ILMN_25424	0.24767	0.0173	-2.97015	-3.76111	-0.758521	A4GALT	alpha 1,4-galactosyltransferase
ILMN_20660	0.24767	0.0173	-2.97012	-3.76116	-0.714317	OR52E2	olfactory receptor family 52 subfamily E member 2
ILMN_3761	0.247813	0.0173	2.9693	-3.76246	0.505728	ITGB8	integrin subunit beta 8
ILMN_8274	0.248103	0.0174	-2.9681	-3.76436	-0.786927	FNDC4	fibronectin type III domain containing 4
ILMN_16203	0.248198	0.0174	2.9674	-3.76546	0.591402	TP53INP1	tumor protein p53 inducible nuclear protein 1
ILMN_2479	0.24832	0.0174	-2.96664	-3.76667	-0.496874	HYAL1	hyaluronoglucosaminidase 1
ILMN_17824	0.203282	0.0116	-3.23259	-3.34646	-1.69785	CXCL11	C-X-C motif chemokine ligand 11
ILMN_19889	0.249286	0.0175	-2.9628	-3.77276	-0.501908	CLDN17	claudin 17
ILMN_4676	0.249286	0.0175	-2.96279	-3.77277	-0.620859	KCNK2	potassium two pore domain channel subfamily K member 2
ILMN_15765	0.250384	0.0176	2.95912	-3.7786	0.766595	CYP3A7	cytochrome P450 family 3 subfamily A member 7
ILMN_5192	0.250384	0.0176	2.95907	-3.77867	0.584414	IL17D	interleukin 17D
ILMN_25813	0.114739	0.00387	-3.97346	-2.20642	-1.71534	FGG	fibrinogen gamma chain
ILMN_9636	0.250635	0.0177	-2.95748	-3.78119	-0.963395	CX3CL1	C-X3-C motif chemokine ligand 1
ILMN_8016	0.250635	0.0177	2.95709	-3.78181	0.702685	CERKL	ceramide kinase like
ILMN_13288	0.250714	0.0177	-2.95644	-3.78284	-0.553426	BAIAP2	BAI1 associated protein 2
ILMN_422	0.250853	0.0177	-2.95564	-3.78411	-0.494625	CSNK2A1	casein kinase 2 alpha 1
ILMN_4766	0.250854	0.0177	2.9552	-3.78482	0.632282	MDK	midkine (neurite growth-promoting factor 2)
ILMN_24093	0.128754	0.00469	-3.83938	-2.40829	-1.71882	GPC3	glypican 3
ILMN_4783	0.251153	0.0178	2.9531	-3.78813	0.632035	C11orf54	chromosome 11 open reading frame 54
ILMN_21733	0.251153	0.0178	2.95275	-3.78869	0.495766	MPP5	membrane palmitoylated protein 5
ILMN_18557	0.0742575	0.00206	-4.42495	-1.54416	-1.73598	IGFALS	insulin like growth factor binding protein acid labile subunit
ILMN_24324	0.2523	0.0179	-2.94928	-3.7942	-0.62056	GALE	UDP-galactose-4-epimerase
ILMN_24979	0.25246	0.0179	2.9484	-3.79559	0.687968	PHOSPHO2	phosphatase, orphan 2
ILMN_25823	0.25246	0.0179	2.94799	-3.79624	0.549307	PARP3	poly(ADP-ribose) polymerase family member 3
ILMN_21378	0.252739	0.018	2.94655	-3.79853	0.649739
ILMN_137079	0.252739	0.018	2.94604	-3.79934	0.950495	MTMR11	myotubularin related protein 11
ILMN_23514	0.252739	0.018	2.94554	-3.80013	0.508514	OXT	oxytocin/neurophysin I prepropeptide
ILMN_25169	0.252739	0.018	-2.94552	-3.80017	-0.469557	NMD3	NMD3 ribosome export adaptor
ILMN_15068	0.252783	0.018	2.94496	-3.80104	0.87031	IFNAR2	interferon alpha and beta receptor subunit 2
ILMN_20238	0.253248	0.018	2.94318	-3.80388	0.519911	ADGRG4	adhesion G protein-coupled receptor G4
ILMN_24329	0.253248	0.0181	-2.94235	-3.80519	-0.801423	TBL1X	transducin (beta)-like 1X-linked
ILMN_1286	0.253248	0.0181	2.9422	-3.80542	0.971367	UTS2B	urotensin 2B
ILMN_30262	0.253248	0.0181	2.94196	-3.80581	0.771674	SCP2	sterol carrier protein 2
ILMN_18937	0.253248	0.0181	-2.9413	-3.80685	-0.469254	SEC22A	SEC22 homolog A, vesicle trafficking protein
ILMN_139141	0.253248	0.0181	-2.94115	-3.80709	-0.544228	CCND1	cyclin D1
ILMN_9725	0.253512	0.0181	-2.94004	-3.80885	-0.453034	DBNDD1	dysbindin domain containing 1
ILMN_137056	0.253645	0.0182	2.93902	-3.81047	0.556679	GAR1	GAR1 ribonucleoprotein
ILMN_1715	0.253645	0.0182	-2.93883	-3.81077	-0.845574	ADSSL1	adenylosuccinate synthase like 1
ILMN_29212	0.253755	0.0182	-2.9378	-3.8124	-0.472458	TDG	thymine DNA glycosylase
ILMN_11662	0.0632882	0.00159	-4.61888	-1.2685	-1.7475	ENPP5	ectonucleotide pyrophosphatase/phosphodiesterase 5 (putative)
ILMN_8700	0.153067	0.0066	-3.60587	-2.76495	-1.75896	COL2A1	collagen type II alpha 1 chain
ILMN_23515	0.254249	0.0183	-2.93496	-3.81691	-0.51948	CHI3L1	chitinase 3 like 1
ILMN_1606	0.254249	0.0183	2.93484	-3.8171	0.881393
ILMN_24245	0.254249	0.0183	2.93469	-3.81734	0.503298	TMEM144	transmembrane protein 144
ILMN_10677	0.118405	0.00407	-3.93801	-2.25957	-1.76644	HPN	hepsin
ILMN_16204	0.255638	0.0184	2.93031	-3.82428	0.680502	SMPDL3A	sphingomyelin phosphodiesterase acid like 3A
ILMN_28835	0.255692	0.0184	-2.92974	-3.82518	-0.498016	WWC1	WW and C2 domain containing 1
ILMN_29436	0.255857	0.0185	-2.92889	-3.82653	-0.567822	NPY2R	neuropeptide Y receptor Y2
ILMN_4860	0.255868	0.0185	2.92822	-3.82759	0.527795	CEBPG	CCAAT/enhancer binding protein gamma
ILMN_15285	0.255868	0.0185	2.92773	-3.82837	0.618695	CACNA2D4	calcium voltage-gated channel auxiliary subunit alpha2delta 4
ILMN_9223	0.255868	0.0185	2.92684	-3.82979	0.482189	PRRG1	proline rich and Gla domain 1
ILMN_13048	0.255868	0.0185	-2.92661	-3.83015	-0.728376	STAB1	stabilin 1
ILMN_11345	0.255868	0.0185	2.9264	-3.83049	0.69582	SIPA1L2	signal induced proliferation associated 1 like 2
ILMN_13320	0.255868	0.0185	-2.92627	-3.83069	-0.505431
ILMN_10394	0.25695	0.0186	2.92288	-3.83606	0.577681	SH3GLB1	SH3 domain containing GRB2 like endophilin B1
ILMN_19271	0.25695	0.0186	-2.92269	-3.83636	-0.712499	PRKACB	protein kinase cAMP-activated catalytic subunit beta
ILMN_18783	0.257149	0.0187	2.92176	-3.83784	0.648585	KCTD13	potassium channel tetramerization domain containing 13
ILMN_25465	0.257196	0.0187	-2.92099	-3.83907	-0.584905
ILMN_26338	0.257196	0.0187	2.92055	-3.83977	0.971099	HDAC9	histone deacetylase 9
ILMN_22371	0.257196	0.0187	-2.92024	-3.84026	-0.606144	HIC2	hypermethylated in cancer 2
ILMN_17178	0.257196	0.0187	2.91993	-3.84075	0.792701	PRR7	proline rich 7 (synaptic)
ILMN_20133	0.307903	0.0274	-2.67711	-4.22598	-1.76909	UBD	ubiquitin D
ILMN_21398	0.275743	0.0219	-2.81794	-4.0026	-1.77956	CXCL5	C-X-C motif chemokine ligand 5
ILMN_23035	0.258921	0.0189	-2.91434	-3.84962	-0.463435	CFAP58	cilia and flagella associated protein 58
ILMN_17901	0.259472	0.0189	-2.91211	-3.85315	-0.436856	VPS72	vacuolar protein sorting 72 homolog
ILMN_23059	0.259472	0.0189	2.91195	-3.85341	0.678108	BAK1	BCL2 antagonist/killer 1
ILMN_17822	0.259472	0.019	-2.91169	-3.85382	-0.490797	PIAS4	protein inhibitor of activated STAT 4
ILMN_25882	0.259884	0.019	2.90973	-3.85693	0.486832	STAP2	signal transducing adaptor family member 2
ILMN_10775	0.259884	0.019	2.9089	-3.85825	0.878842	FAM105A	family with sequence similarity 105 member A
ILMN_2475	0.259884	0.0191	2.90808	-3.85954	0.665606	PAM	peptidylglycine alpha-amidating monooxygenase
ILMN_25001	0.259884	0.0191	2.90798	-3.8597	0.977716	UGT2B28	UDP glucuronosyltransferase family 2 member B28
ILMN_29343	0.259884	0.0191	2.90763	-3.86026	0.593593
ILMN_27181	0.259884	0.0191	2.90746	-3.86053	0.671341	ASAH2	N-acylsphingosine amidohydrolase 2
ILMN_7187	0.259884	0.0191	2.90731	-3.86077	0.52278	ASB4	ankyrin repeat and SOCS box containing 4
ILMN_29062	0.259884	0.0191	2.90726	-3.86085	0.668898	FOXD2	forkhead box D2
ILMN_18984	0.259939	0.0191	-2.9067	-3.86174	-0.722069	KRTAP10-1	keratin associated protein 10-1
ILMN_9175	0.260024	0.0191	-2.90586	-3.86307	-0.457354	ITIH5	inter-alpha-trypsin inhibitor heavy chain family member 5
ILMN_15997	0.260024	0.0192	2.90501	-3.86441	0.72877	COL9A1	collagen type IX alpha 1 chain
ILMN_30365	0.260024	0.0192	2.90479	-3.86476	0.471298	COPS2	COP9 signalosome subunit 2
ILMN_5994	0.260024	0.0192	-2.90474	-3.86485	-0.834629	OAS2	2'-5'-oligoadenylate synthetase 2
ILMN_4322	0.260024	0.0192	2.90395	-3.8661	0.491518	KANK1	KN motif and ankyrin repeat domains 1
ILMN_3625	0.260024	0.0192	-2.9036	-3.86666	-0.611496	KCNAB1	potassium voltage-gated channel subfamily A member regulatory beta subunit 1
ILMN_15945	0.260024	0.0192	-2.90287	-3.86781	-0.532625	RNASE12	ribonuclease A family member 12 (inactive)
ILMN_1704	0.260024	0.0192	-2.90279	-3.86794	-0.651851	ZNF471	zinc finger protein 471
ILMN_138217	0.260024	0.0192	-2.90268	-3.86812	-0.569145	UBR4	ubiquitin protein ligase E3 component n-recognin 4
ILMN_14701	0.260116	0.0192	-2.90203	-3.86915	-0.661301	EIF4G3	eukaryotic translation initiation factor 4 gamma 3
ILMN_12381	0.260308	0.0193	2.90096	-3.87085	0.599199
ILMN_2390	0.260308	0.0193	-2.90071	-3.87124	-0.584548	KCTD14	potassium channel tetramerization domain containing 14
ILMN_4115	0.260552	0.0193	-2.89969	-3.87286	-0.570234
ILMN_3831	0.260642	0.0193	-2.89904	-3.87388	-0.712182	TMEM86B	transmembrane protein 86B
ILMN_2366	0.260909	0.0194	2.89796	-3.8756	0.477747	PPP2R5D	protein phosphatase 2 regulatory subunit B'delta
ILMN_19785	0.26104	0.0194	2.89721	-3.8768	0.551437	DSCR3	DSCR3 arrestin fold containing
ILMN_5617	0.26104	0.0194	2.89678	-3.87748	0.80411	NUP62CL	nucleoporin 62 C-terminal like
ILMN_138591	0.26104	0.0194	-2.89638	-3.87811	-0.764951	VASN	vasorin
ILMN_27313	0.261129	0.0194	2.89574	-3.87912	0.487986	TOM1	target of myb1 membrane trafficking protein
ILMN_18633	0.261396	0.0195	2.89391	-3.88203	0.506406	HEPACAM	hepatic and glial cell adhesion molecule
ILMN_25790	0.261396	0.0195	-2.89388	-3.88207	-0.72059	SLFN5	schlafen family member 5
ILMN_17249	0.261396	0.0195	2.89338	-3.88287	0.699221	E2F5	E2F transcription factor 5
ILMN_17346	0.261396	0.0195	-2.89304	-3.88341	-0.546896	OPRM1	opioid receptor mu 1
ILMN_11272	0.261396	0.0195	-2.89299	-3.88348	-0.481397	CYSTM1	cysteine rich transmembrane module containing 1
ILMN_21017	0.261555	0.0195	2.89183	-3.88533	0.557473	AKAP7	A-kinase anchoring protein 7
ILMN_16935	0.261555	0.0196	-2.89169	-3.88555	-0.467575	DUS2	dihydrouridine synthase 2
ILMN_6884	0.261555	0.0196	-2.89124	-3.88626	-0.655015	BRAT1	BRCA1 associated ATM activator 1
ILMN_6723	0.261555	0.0196	-2.89069	-3.88714	-0.728446	FCN3	ficolin 3
ILMN_21642	0.261555	0.0196	-2.88916	-3.88957	-0.718024	TCL1A	T-cell leukemia/lymphoma 1A
ILMN_25770	0.261555	0.0196	-2.88909	-3.88968	-0.85692
ILMN_139401	0.261555	0.0196	-2.88907	-3.88971	-0.55244	ARIH2	ariadne RBR E3 ubiquitin protein ligase 2
ILMN_9962	0.261555	0.0196	-2.88855	-3.89053	-0.574076	LARP1B	La ribonucleoprotein domain family member 1B
ILMN_22838	0.261555	0.0197	2.88845	-3.89069	0.996882	TNFRSF18	TNF receptor superfamily member 18
ILMN_18139	0.261555	0.0197	-2.88844	-3.89071	-0.67141	UBQLN4	ubiquilin 4
ILMN_27994	0.0341979	0.000634	-5.33617	-0.29672	-1.78096	ANGPTL3	angiopoietin like 3
ILMN_7398	0.033959	0.000628	-5.34401	-0.28651	-1.78883	FAM150B	family with sequence similarity 150 member B
ILMN_11566	0.262497	0.0198	2.88476	-3.89655	0.829554	MAOA	monoamine oxidase A
ILMN_25119	0.262497	0.0198	2.88426	-3.89734	0.621201	ZCCHC9	zinc finger CCHC-type containing 9
ILMN_5448	0.262497	0.0198	2.88335	-3.89879	0.485668	SUCLA2	succinate-CoA ligase ADP-forming beta subunit
ILMN_23990	0.257817	0.0188	-2.91795	-3.84389	-1.80032	SCNN1G	sodium channel epithelial 1 gamma subunit
ILMN_17454	0.262497	0.0198	2.88285	-3.89957	0.506342	SLC38A4	solute carrier family 38 member 4
ILMN_25104	0.262497	0.0198	-2.88282	-3.89963	-0.595027	FOXA1	forkhead box A1
ILMN_18521	0.262854	0.0199	-2.88153	-3.90167	-0.652497	MID2	midline 2
ILMN_1351	0.262941	0.0199	-2.88054	-3.90325	-0.473946	MAPK1	mitogen-activated protein kinase 1
ILMN_5661	0.262941	0.0199	-2.88049	-3.90333	-0.595752	TCHHL1	trichohyalin like 1
ILMN_17961	0.262941	0.0199	2.88009	-3.90397	0.539737	KLF6	Kruppel like factor 6
ILMN_25101	0.263055	0.0199	-2.8794	-3.90506	-0.457667	DYSF	dysferlin
ILMN_20180	0.263593	0.02	-2.87767	-3.9078	-0.676554	C2CD2	C2 calcium dependent domain containing 2
ILMN_26089	0.263792	0.02	-2.87678	-3.90922	-0.56511	PI16	peptidase inhibitor 16
ILMN_15973	0.263891	0.02	2.87591	-3.9106	0.444222	CBLC	Cbl proto-oncogene C
ILMN_10085	0.263891	0.0201	2.87558	-3.91112	0.703625	DDX59	DEAD-box helicase 59
ILMN_770	0.263891	0.0201	-2.87518	-3.91176	-0.638339	KRT83	keratin 83
ILMN_26612	0.00053571	2.21e-06	-11.588	5.5853	-1.82824	CA9	carbonic anhydrase 9
ILMN_1672	0.264126	0.0201	-2.87327	-3.91478	-0.665478	GUCA1B	guanylate cyclase activator 1B
ILMN_10552	0.264126	0.0201	2.87277	-3.91558	0.465095	PPM1A	protein phosphatase, Mg2+/Mn2+ dependent 1A
ILMN_18270	0.264126	0.0201	-2.87242	-3.91614	-0.745749	OPCML	opioid binding protein/cell adhesion molecule like
ILMN_20914	0.188874	0.00991	-3.33435	-3.18677	-1.83821	GPER1	G protein-coupled estrogen receptor 1
ILMN_15485	0.264126	0.0202	-2.87228	-3.91636	-0.613217
ILMN_9440	0.264992	0.0202	-2.86977	-3.92034	-0.490366	GAGE4	G antigen 4
ILMN_3438	0.265764	0.0203	-2.8675	-3.92394	-0.47424	AMACR	alpha-methylacyl-CoA racemase
ILMN_12951	0.265771	0.0203	-2.86707	-3.92462	-0.541827	MIS12	MIS12, kinetochore complex component
ILMN_23057	0.266048	0.0204	2.86571	-3.92678	0.65687	ACO2	aconitase 2
ILMN_15836	0.266048	0.0204	-2.86559	-3.92698	-0.782349	SYTL4	synaptotagmin like 4
ILMN_777	0.266048	0.0204	-2.86518	-3.92762	-0.557523	GPX2	glutathione peroxidase 2
ILMN_2281	0.18284	0.00925	-3.38017	-3.11511	-1.8521	PDIA2	protein disulfide isomerase family A member 2
ILMN_11349	0.266512	0.0205	-2.86264	-3.93165	-0.557821	HORMAD2	HORMA domain containing 2
ILMN_5543	0.102169	0.00328	-4.09133	-2.03086	-1.8592	TPD52L1	tumor protein D52-like 1
ILMN_22369	0.266512	0.0205	-2.8617	-3.93315	-0.44662	C6orf106	chromosome 6 open reading frame 106
ILMN_4346	0.266512	0.0205	2.86152	-3.93343	0.656721	NAAA	N-acylethanolamine acid amidase
ILMN_27413	0.266512	0.0205	-2.86141	-3.93361	-0.664231	PROM2	prominin 2
ILMN_18681	0.266512	0.0205	-2.86122	-3.9339	-0.732726	FADS3	fatty acid desaturase 3
ILMN_27289	0.0898798	0.0027	-4.2299	-1.82684	-1.8651	PAK3	p21 (RAC1) activated kinase 3
ILMN_20406	0.267156	0.0206	-2.85887	-3.93764	-0.986998	CLIC3	chloride intracellular channel 3
ILMN_29568	0.267478	0.0206	-2.85769	-3.93951	-0.533959	OBFC1	oligonucleotide/oligosaccharide binding fold containing 1
ILMN_21400	0.267507	0.0206	-2.85699	-3.94061	-0.568626	STARD10	StAR related lipid transfer domain containing 10
ILMN_20816	0.304966	0.0267	-2.69331	-4.20031	-1.87208	LTF	lactotransferrin
ILMN_2558	0.267599	0.0207	2.85619	-3.94189	0.54846
ILMN_138605	0.267935	0.0207	2.85498	-3.94381	0.499103	LONRF1	LON peptidase N-terminal domain and ring finger 1
ILMN_12682	0.26836	0.0208	2.85356	-3.94606	0.527301	SEC24C	SEC24 homolog C, COPII coat complex component
ILMN_12223	0.268714	0.0208	-2.85209	-3.94839	-0.600282	AKR1B1	aldo-keto reductase family 1 member B
ILMN_18445	0.268714	0.0208	2.85191	-3.94868	0.557974	EFNA2	ephrin A2
ILMN_15530	0.268897	0.0208	-2.85107	-3.95001	-0.625885	CLOCK	clock circadian regulator
ILMN_15648	0.269616	0.0209	-2.84896	-3.95336	-0.569373	MYBPC3	myosin binding protein C, cardiac
ILMN_19736	0.269667	0.0209	2.84844	-3.95419	0.687097	LGALS2	galectin 2
ILMN_19964	0.267507	0.0206	-2.85681	-3.9409	-1.87425	SLC2A12	solute carrier family 2 member 12
ILMN_20077	0.270471	0.021	2.84573	-3.95849	0.444292	HFM1	HFM1, ATP dependent DNA helicase homolog
ILMN_15088	0.270479	0.021	2.84531	-3.95916	0.779597	PRELID3B	PRELI domain containing 3B
ILMN_7814	0.270525	0.0211	-2.84408	-3.96111	-0.442389	NCKAP1	NCK associated protein 1
ILMN_16800	0.270525	0.0211	-2.84404	-3.96117	-0.885876	LDHB	lactate dehydrogenase B
ILMN_24817	0.270525	0.0211	2.844	-3.96124	0.507054	TREML4	triggering receptor expressed on myeloid cells like 4
ILMN_1041	0.270753	0.0211	2.84254	-3.96355	0.642809	FAM83B	family with sequence similarity 83 member B
ILMN_1069	0.270753	0.0211	-2.84238	-3.96381	-0.517042	CYP2S1	cytochrome P450 family 2 subfamily S member 1
ILMN_26130	0.270753	0.0211	2.84226	-3.96399	0.462484	RPL12	ribosomal protein L12
ILMN_26457	0.270775	0.0212	2.84091	-3.96614	0.450811	RPL7A	ribosomal protein L7a
ILMN_28026	0.270775	0.0212	-2.84087	-3.96621	-0.640682	TMOD3	tropomodulin 3
ILMN_5656	0.270775	0.0212	-2.84067	-3.96651	-0.496934	FOXO1	forkhead box O1
ILMN_2939	0.270775	0.0212	2.84021	-3.96725	0.579101	PKP2	plakophilin 2
ILMN_10855	0.270775	0.0212	-2.84012	-3.9674	-0.461053
ILMN_8047	0.270775	0.0212	2.83965	-3.96814	0.462952	RPGRIP1L	RPGRIP1 like
ILMN_21054	0.270775	0.0212	-2.83942	-3.9685	-0.600785	ALCAM	activated leukocyte cell adhesion molecule
ILMN_2929	0.00528231	4.62e-05	-7.76691	2.4693	-1.88291	EEF1A2	eukaryotic translation elongation factor 1 alpha 2
ILMN_23910	0.27126	0.0213	-2.83714	-3.97213	-0.440597	LCE1B	late cornified envelope 1B
ILMN_10745	0.27126	0.0213	-2.83709	-3.97221	-0.542162	CCR4	C-C motif chemokine receptor 4
ILMN_5888	0.271466	0.0213	2.8362	-3.97361	0.446182	SNX4	sorting nexin 4
ILMN_9469	0.271609	0.0214	-2.83514	-3.97529	-0.641047	FSIP2	fibrous sheath interacting protein 2
ILMN_16554	0.271609	0.0214	-2.83502	-3.97549	-0.452968	WNT9A	Wnt family member 9A
ILMN_25628	0.271609	0.0214	2.83468	-3.97603	0.697799	CNKSR3	CNKSR family member 3
ILMN_25396	0.271761	0.0214	2.83393	-3.97722	0.464595
ILMN_13488	0.271777	0.0214	-2.83346	-3.97796	-0.698343
ILMN_19894	0.271777	0.0214	-2.8331	-3.97854	-0.466045	PTH1R	parathyroid hormone 1 receptor
ILMN_14100	0.271916	0.0214	-2.83238	-3.97968	-0.599553	KIF20A	kinesin family member 20A
ILMN_4712	0.112625	0.00375	-3.99533	-2.17371	-1.91675	SERPINA5	serpin family A member 5
ILMN_137451	0.271953	0.0215	-2.83092	-3.982	-0.483491	DIXDC1	DIX domain containing 1
ILMN_14816	0.271953	0.0215	2.83077	-3.98223	0.751991	TEX11	testis expressed 11
ILMN_7868	0.00148294	8.57e-06	-9.72367	4.21545	-1.92144	SPRR1A	small proline rich protein 1A
ILMN_137193	0.271953	0.0215	2.83032	-3.98295	0.971523	SECISBP2	SECIS binding protein 2
ILMN_2005	0.272267	0.0216	2.8288	-3.98537	0.539928	SEMA6D	semaphorin 6D
ILMN_14880	0.272267	0.0216	2.82873	-3.98547	0.75266	NFIL3	nuclear factor, interleukin 3 regulated
ILMN_18604	0.272267	0.0216	-2.82814	-3.9864	-0.449222	FLYWCH1	FLYWCH-type zinc finger 1
ILMN_22703	0.272267	0.0216	2.82801	-3.98661	0.588549	OR51Q1	olfactory receptor family 51 subfamily Q member 1 (gene/pseudogene)
ILMN_4886	0.272445	0.0216	-2.8272	-3.98789	-0.770103	SPTBN1	spectrin beta, non-erythrocytic 1
ILMN_21394	0.266512	0.0205	-2.86181	-3.93298	-1.93848	LEPR	leptin receptor
ILMN_5506	0.273888	0.0218	-2.82304	-3.99451	-0.557906	OR4K2	olfactory receptor family 4 subfamily K member 2
ILMN_19249	0.274943	0.0219	-2.82019	-3.99903	-0.438744	CEP89	centrosomal protein 89
ILMN_11097	0.00616028	5.77e-05	-7.53314	2.23502	-1.94079	DUSP4	dual specificity phosphatase 4
ILMN_23231	0.275847	0.022	-2.81694	-4.00419	-0.443359	FIBCD1	fibrinogen C domain containing 1
ILMN_10794	0.275847	0.022	2.81691	-4.00423	0.447388	ARHGAP44	Rho GTPase activating protein 44
ILMN_19904	0.275888	0.022	-2.81643	-4.005	-0.46429
ILMN_7717	0.276304	0.022	2.81494	-4.00735	0.551616	AP3S1	adaptor related protein complex 3 sigma 1 subunit
ILMN_25776	0.146587	0.00613	-3.65616	-2.68762	-1.9621	CNTD1	cyclin N-terminal domain containing 1
ILMN_29441	0.276538	0.0221	2.81375	-4.00924	0.477873	POLRMT	RNA polymerase mitochondrial
ILMN_29510	0.27686	0.0221	2.81262	-4.01104	0.447453	GALNT14	polypeptide N-acetylgalactosaminyltransferase 14
ILMN_6961	0.277626	0.0222	-2.80998	-4.01523	-0.434672	FIP1L1	factor interacting with PAPOLA and CPSF1
ILMN_568	0.277626	0.0222	-2.8097	-4.01568	-0.535276	AP3M2	adaptor related protein complex 3 mu 2 subunit
ILMN_26464	0.277626	0.0222	-2.80938	-4.01618	-0.496628	RAB13	RAB13, member RAS oncogene family
ILMN_23986	0.277626	0.0222	-2.8093	-4.01631	-0.534006	ZMYND10	zinc finger MYND-type containing 10
ILMN_9763	0.277643	0.0223	-2.80887	-4.01699	-0.646468	FBXO5	F-box protein 5
ILMN_1226	0.277823	0.0223	-2.80769	-4.01887	-0.63202
ILMN_14934	0.277823	0.0223	-2.80768	-4.01888	-0.619383	KLK13	kallikrein related peptidase 13
ILMN_29538	0.278528	0.0224	2.80567	-4.02206	0.487675	BBS7	Bardet-Biedl syndrome 7
ILMN_9502	0.278726	0.0224	-2.80483	-4.0234	-0.867107	GDPD3	glycerophosphodiester phosphodiesterase domain containing 3
ILMN_16771	0.278865	0.0224	-2.80379	-4.02505	-0.82923	ANKRD29	ankyrin repeat domain 29
ILMN_25414	0.278865	0.0224	-2.80367	-4.02525	-0.550591	MYO9B	myosin IXB
ILMN_3739	0.278865	0.0224	-2.80335	-4.02575	-0.440367	HYDIN	HYDIN, axonemal central pair apparatus protein
ILMN_10283	0.278953	0.0225	2.80277	-4.02668	0.465299	CDR2	cerebellar degeneration related protein 2
ILMN_6055	0.279864	0.0226	2.80017	-4.0308	0.759047	USF2	upstream transcription factor 2, c-fos interacting
ILMN_8630	0.279864	0.0226	2.7998	-4.03138	0.593388	CUX1	cut like homeobox 1
ILMN_19352	0.279864	0.0226	2.79953	-4.03182	0.622516	ZSCAN1	zinc finger and SCAN domain containing 1
ILMN_3124	0.280557	0.0227	-2.7973	-4.03536	-0.44053	RFWD3	ring finger and WD repeat domain 3
ILMN_14271	0.243304	0.0167	-2.99337	-3.72431	-1.98151	IRX2	iroquois homeobox 2
ILMN_29296	0.280672	0.0227	-2.79653	-4.03658	-0.536824
ILMN_20817	0.280915	0.0227	2.79559	-4.03807	0.732559	CHST6	carbohydrate sulfotransferase 6
ILMN_19099	0.281253	0.0228	2.79439	-4.03996	0.611945	CLTB	clathrin light chain B
ILMN_10946	0.281253	0.0228	2.79406	-4.0405	0.78742	LY75	lymphocyte antigen 75
ILMN_3255	0.281587	0.0228	2.79291	-4.04231	0.863073	SCAMP5	secretory carrier membrane protein 5
ILMN_2927	0.281703	0.0228	-2.7921	-4.0436	-0.633714	KRBA1	KRAB-A domain containing 1
ILMN_8596	0.281703	0.0229	2.79167	-4.04429	0.425413	LSM6	LSM6 homolog, U6 small nuclear RNA and mRNA degradation associated
ILMN_14042	0.281703	0.0229	2.7915	-4.04456	0.785656	LRRN3	leucine rich repeat neuronal 3
ILMN_3676	0.282358	0.0229	2.7892	-4.04822	0.440606	CYP11B2	cytochrome P450 family 11 subfamily B member 2
ILMN_5846	0.282358	0.023	2.78891	-4.04866	0.445396	KLHL32	kelch like family member 32
ILMN_25671	0.356236	0.0397	-2.44047	-4.59946	-2.01027	DUOXA2	dual oxidase maturation factor 2
ILMN_17806	0.282573	0.023	2.788	-4.05011	0.490292	FBXO31	F-box protein 31
ILMN_18873	0.283102	0.023	-2.78643	-4.05261	-0.590849	COPRS	coordinator of PRMT5 and differentiation stimulator
ILMN_1387	0.283104	0.0231	2.78604	-4.05322	0.589633	STAMBPL1	STAM binding protein like 1
ILMN_2064	0.283584	0.0231	2.78432	-4.05595	0.501089	APOBEC3D	apolipoprotein B mRNA editing enzyme catalytic subunit 3D
ILMN_11293	0.283584	0.0231	2.78375	-4.05685	0.454917	ACADS	acyl-CoA dehydrogenase, C-2 to C-3 short chain
ILMN_18343	0.283584	0.0231	-2.78363	-4.05705	-0.478185	JADE2	jade family PHD finger 2
ILMN_19646	0.283584	0.0232	-2.78343	-4.05736	-0.613112	WIPI1	WD repeat domain, phosphoinositide interacting 1
ILMN_20498	0.284707	0.0233	-2.78019	-4.0625	-0.512579	EPS15L1	epidermal growth factor receptor pathway substrate 15 like 1
ILMN_10106	0.284707	0.0233	2.78011	-4.06263	0.910952	GALNT8	polypeptide N-acetylgalactosaminyltransferase 8
ILMN_9279	0.284707	0.0233	-2.77977	-4.06317	-0.693538	CTNNAL1	catenin alpha like 1
ILMN_19114	0.0410376	0.000811	-5.13902	-0.55627	-2.01864	DNER	delta/notch like EGF repeat containing
ILMN_6222	0.284924	0.0233	-2.77817	-4.06571	-0.823491	MCOLN2	mucolipin 2
ILMN_14481	0.284924	0.0233	-2.77815	-4.06575	-0.673065	GPR146	G protein-coupled receptor 146
ILMN_20212	0.285615	0.0234	2.77602	-4.06912	0.673948
ILMN_3980	0.285615	0.0234	-2.77575	-4.06955	-0.840526	TDRD10	tudor domain containing 10
ILMN_5892	0.285615	0.0234	-2.77546	-4.07001	-0.474982	VARS2	valyl-tRNA synthetase 2, mitochondrial
ILMN_8346	0.285933	0.0235	2.77438	-4.07173	0.522384	KNL1	kinetochore scaffold 1
ILMN_2897	0.285981	0.0235	-2.77383	-4.0726	-0.511535	PHLDB3	pleckstrin homology like domain family B member 3
ILMN_29003	0.285981	0.0235	-2.77351	-4.0731	-0.438383	KCNN3	potassium calcium-activated channel subfamily N member 3
ILMN_18833	0.0193353	0.000284	-6.01673	0.55624	-2.02427	GBGT1	globoside alpha-1,3-N-acetylgalactosaminyltransferase 1
ILMN_22532	0.286759	0.0236	-2.77066	-4.07763	-0.56108	EBAG9	estrogen receptor binding site associated, antigen, 9
ILMN_25806	0.181812	0.00906	-3.39361	-3.09414	-2.02764	RNF208	ring finger protein 208
ILMN_1745	0.286759	0.0237	2.76983	-4.07895	0.917882
ILMN_137280	0.0619738	0.00153	-4.64638	-1.22984	-2.03673	HACD1	3-hydroxyacyl-CoA dehydratase 1
ILMN_5239	0.103558	0.00333	-4.07909	-2.049	-2.06014	FNDC5	fibronectin type III domain containing 5
ILMN_20971	0.286885	0.0237	-2.76861	-4.08089	-0.505517	PPP4R4	protein phosphatase 4 regulatory subunit 4
ILMN_26225	0.286885	0.0237	2.76849	-4.08107	0.480051	FAM168B	family with sequence similarity 168 member B
ILMN_2671	0.287266	0.0237	-2.76726	-4.08302	-0.92743	PPP1R17	protein phosphatase 1 regulatory subunit 17
ILMN_17428	0.287718	0.0238	-2.76589	-4.0852	-0.479028	ADAM20	ADAM metallopeptidase domain 20
ILMN_24980	0.288035	0.0238	-2.76481	-4.08691	-0.887782	CSF1R	colony stimulating factor 1 receptor
ILMN_25969	0.288183	0.0239	-2.76402	-4.08816	-0.682571	KIF2C	kinesin family member 2C
ILMN_11069	0.288183	0.0239	2.76373	-4.08862	0.534177	ENTPD8	ectonucleoside triphosphate diphosphohydrolase 8
ILMN_12357	0.289233	0.024	-2.76104	-4.0929	-0.59167
ILMN_9454	0.289283	0.024	-2.76047	-4.0938	-0.564792	FAM76A	family with sequence similarity 76 member A
ILMN_584	0.289283	0.024	-2.76018	-4.09426	-0.752115	VIT	vitrin
ILMN_26228	0.289922	0.0241	-2.7584	-4.09709	-0.663361	UGCG	UDP-glucose ceramide glucosyltransferase
ILMN_27752	0.290251	0.0241	-2.7573	-4.09883	-0.458529	CALN1	calneuron 1
ILMN_21160	0.29027	0.0241	-2.75688	-4.09949	-0.729229	SLC16A7	solute carrier family 16 member 7
ILMN_7808	0.0100717	0.000113	-6.86318	1.52876	-2.07775	CHST3	carbohydrate sulfotransferase 3
ILMN_24856	0.0494249	0.00111	-4.88973	-0.89265	-2.08657	AQP4	aquaporin 4
ILMN_6770	0.290819	0.0242	-2.75456	-4.10317	-0.432235	OR2B2	olfactory receptor family 2 subfamily B member 2
ILMN_4031	0.291334	0.0243	-2.75306	-4.10555	-0.42749	SNTA1	syntrophin alpha 1
ILMN_14302	0.291337	0.0243	2.75246	-4.1065	0.535613	SOD1	superoxide dismutase 1, soluble
ILMN_25184	0.291337	0.0243	-2.75231	-4.10674	-0.641086	ALPP	alkaline phosphatase, placental
ILMN_27595	0.29134	0.0243	2.75193	-4.10734	0.730129	C11orf24	chromosome 11 open reading frame 24
ILMN_5174	0.291356	0.0243	-2.75152	-4.10799	-0.700072	TSHZ2	teashirt zinc finger homeobox 2
ILMN_16691	0.291927	0.0244	2.7499	-4.11056	0.495431	MPV17L	MPV17 mitochondrial inner membrane protein like
ILMN_23387	0.292863	0.0245	-2.74737	-4.11458	-0.581826	VN1R4	vomeronasal 1 receptor 4
ILMN_27264	0.00363748	2.84e-05	-8.2935	2.97554	-2.11135	EDARADD	EDAR associated death domain
ILMN_28174	0.292863	0.0245	-2.74637	-4.11617	-0.657093	CSMD3	CUB and Sushi multiple domains 3
ILMN_28958	0.292863	0.0245	-2.74617	-4.11649	-0.619827	NRIP3	nuclear receptor interacting protein 3
ILMN_13051	0.292863	0.0246	2.74601	-4.11674	0.468265	LTK	leukocyte receptor tyrosine kinase
ILMN_9966	0.293217	0.0246	-2.74474	-4.11875	-0.750821	CAB39L	calcium binding protein 39 like
ILMN_11495	0.293217	0.0246	2.74398	-4.11996	0.936889	GCNT3	glucosaminyl (N-acetyl) transferase 3, mucin type
ILMN_10895	0.293217	0.0246	-2.74388	-4.12012	-0.574755	PTPDC1	protein tyrosine phosphatase domain containing 1
ILMN_8809	0.293217	0.0246	-2.74358	-4.1206	-0.446889	SEC63	SEC63 homolog, protein translocation regulator
ILMN_28034	0.293217	0.0247	2.7434	-4.12088	0.578276	SLC2A9	solute carrier family 2 member 9
ILMN_14445	0.293256	0.0247	-2.74292	-4.12163	-0.622488	PSPH	phosphoserine phosphatase
ILMN_15308	0.293256	0.0247	-2.74257	-4.12219	-0.480564	TMEM200B	transmembrane protein 200B
ILMN_30180	0.294532	0.0248	-2.73944	-4.12717	-0.439629	SOX8	SRY-box 8
ILMN_12054	0.294549	0.0249	-2.73807	-4.12933	-0.908499	FAM189A2	family with sequence similarity 189 member A2
ILMN_25618	0.294549	0.0249	-2.73787	-4.12965	-0.455178	FOXN4	forkhead box N4
ILMN_14122	0.294549	0.0249	-2.73769	-4.12994	-0.447996	MRPL17	mitochondrial ribosomal protein L17
ILMN_1974	0.00317049	2.34e-05	-8.51324	3.17839	-2.14686	ST3GAL1	ST3 beta-galactoside alpha-2,3-sialyltransferase 1
ILMN_17706	0.294549	0.0249	-2.73756	-4.13014	-0.769997	EFNB3	ephrin B3
ILMN_1416	0.294553	0.0249	-2.73719	-4.13073	-0.473845	PARVB	parvin beta
ILMN_9774	0.295504	0.025	-2.73477	-4.13457	-0.537431	TRIM29	tripartite motif containing 29
ILMN_22846	0.295526	0.025	-2.73403	-4.13574	-0.901094	DLGAP2	DLG associated protein 2
ILMN_5053	0.295526	0.025	-2.73398	-4.13583	-0.768557	PSG6	pregnancy specific beta-1-glycoprotein 6
ILMN_7147	0.295526	0.025	2.73362	-4.13639	0.458504	ECM2	extracellular matrix protein 2
ILMN_15321	0.296331	0.0251	2.73152	-4.13972	0.461116	TOP1MT	topoisomerase (DNA) I, mitochondrial
ILMN_1608	0.297219	0.0252	-2.72922	-4.14338	-0.687944	TUBG1	tubulin gamma 1
ILMN_26465	0.297219	0.0252	-2.72843	-4.14462	-0.490542	SHROOM4	shroom family member 4
ILMN_9090	0.118463	0.00409	-3.93479	-2.26442	-2.18428	CCKBR	cholecystokinin B receptor
ILMN_13716	0.297219	0.0253	-2.72745	-4.14618	-0.518766	ANG	angiogenin
ILMN_16249	0.297219	0.0253	2.72724	-4.14651	0.885214	BMF	Bcl2 modifying factor
ILMN_979	0.297219	0.0253	-2.72715	-4.14666	-0.429289
ILMN_13195	0.297219	0.0253	-2.72693	-4.147	-0.609784	SLC6A9	solute carrier family 6 member 9
ILMN_24802	0.297219	0.0253	-2.72662	-4.14749	-0.83494	ME3	malic enzyme 3
ILMN_671	0.297219	0.0253	2.72578	-4.14883	0.532127	PRKAG2	protein kinase AMP-activated non-catalytic subunit gamma 2
ILMN_26142	0.297219	0.0253	-2.72575	-4.14887	-0.444333	ZNF669	zinc finger protein 669
ILMN_30260	0.297219	0.0253	-2.72561	-4.1491	-0.647998	LSS	lanosterol synthase (2,3-oxidosqualene-lanosterol cyclase)
ILMN_24952	0.298284	0.0255	-2.72292	-4.15336	-0.682213	DHCR24	24-dehydrocholesterol reductase
ILMN_138936	0.298284	0.0255	-2.7226	-4.15387	-0.44741
ILMN_21621	0.298708	0.0255	-2.72133	-4.15588	-0.455359	ENAM	enamelin
ILMN_26131	0.29887	0.0255	2.72063	-4.157	0.537856	HIST1H2AI	histone cluster 1, H2ai
ILMN_22076	0.0057353	5.29e-05	-7.62363	2.32643	-2.26302	HSPB8	heat shock protein family B (small) member 8
ILMN_9784	0.299115	0.0256	-2.71873	-4.16	-0.528117	BPY2C	basic charge, Y-linked, 2C
ILMN_2732	0.299115	0.0256	-2.71859	-4.16024	-0.802797	IGFBP2	insulin like growth factor binding protein 2
ILMN_6176	0.299115	0.0256	-2.71832	-4.16066	-0.476265	SMARCC2	SWI/SNF related, matrix associated, actin dependent regulator of chromatin subfamily c member 2
ILMN_6142	0.299115	0.0257	2.71799	-4.16119	0.461071	PDLIM1	PDZ and LIM domain 1
ILMN_13260	0.299115	0.0257	-2.71793	-4.16127	-0.766566
ILMN_15092	0.299259	0.0257	2.71708	-4.16263	0.49891	C5orf45	chromosome 5 open reading frame 45
ILMN_24067	0.0916803	0.00281	-4.20069	-1.86964	-2.2989	SBSPON	somatomedin B and thrombospondin type 1 domain containing
ILMN_7290	0.299259	0.0257	2.71655	-4.16347	0.587405	SESN2	sestrin 2
ILMN_6139	0.300288	0.0258	-2.71398	-4.16754	-0.430953	STK25	serine/threonine kinase 25
ILMN_16087	0.300288	0.0258	-2.71364	-4.16808	-0.435539	ARMC9	armadillo repeat containing 9
ILMN_22733	0.300313	0.0258	-2.71323	-4.16873	-0.549803	CABP1	calcium binding protein 1
ILMN_12155	0.300661	0.0259	2.71193	-4.17079	0.467745	CCDC50	coiled-coil domain containing 50
ILMN_1001	0.300661	0.0259	2.71177	-4.17105	0.661462	SCIN	scinderin
ILMN_4567	0.300806	0.0259	-2.71087	-4.17247	-0.892753
ILMN_138686	0.300806	0.0259	-2.71074	-4.17267	-0.547028	BMP2	bone morphogenetic protein 2
ILMN_25419	0.30111	0.026	2.70959	-4.1745	0.573416	FAM102B	family with sequence similarity 102 member B
ILMN_18028	0.30111	0.026	-2.70938	-4.17483	-0.589207	FAM107A	family with sequence similarity 107 member A
ILMN_3694	0.301117	0.026	-2.70892	-4.17556	-0.559287	PIEZO1	piezo type mechanosensitive ion channel component 1
ILMN_21927	0.301117	0.026	2.70865	-4.17599	0.616909	BLZF1	basic leucine zipper nuclear factor 1
ILMN_23719	0.301477	0.0261	2.70753	-4.17776	0.473407	CSDC2	cold shock domain containing C2
ILMN_29728	0.301876	0.0261	-2.70633	-4.17966	-0.61109	CRIP2	cysteine rich protein 2
ILMN_6060	0.302632	0.0262	-2.70431	-4.18287	-0.484094
ILMN_29976	0.302632	0.0262	2.70402	-4.18332	0.468072	TFDP2	transcription factor Dp-2
ILMN_28124	0.302838	0.0263	2.70324	-4.18458	0.420083	MTPN	myotrophin
ILMN_29877	0.302952	0.0263	-2.70249	-4.18575	-0.630578	CETP	cholesteryl ester transfer protein
ILMN_28851	0.302952	0.0263	-2.70228	-4.18609	-0.552888	OR7A5	olfactory receptor family 7 subfamily A member 5
ILMN_137811	0.303103	0.0263	2.70161	-4.18715	0.397303	RINL	Ras and Rab interactor like
ILMN_16145	0.303433	0.0264	-2.70052	-4.18887	-0.546675
ILMN_3912	0.303433	0.0264	2.70005	-4.18963	0.918759	NFATC2	nuclear factor of activated T-cells 2
ILMN_4933	0.303433	0.0264	-2.69985	-4.18995	-0.633104	OR10G4	olfactory receptor family 10 subfamily G member 4
ILMN_28172	0.303779	0.0264	2.69877	-4.19166	0.430229	LINGO1	leucine rich repeat and Ig domain containing 1
ILMN_8751	0.304071	0.0265	2.69768	-4.19338	0.745762	CHST5	carbohydrate sulfotransferase 5
ILMN_13299	0.304071	0.0265	-2.69744	-4.19376	-0.465168
ILMN_2916	0.304206	0.0265	-2.6966	-4.19509	-0.864794	CMA1	chymase 1
ILMN_17356	0.304206	0.0265	-2.69627	-4.19562	-0.594561	CAPZA3	capping actin protein of muscle Z-line alpha subunit 3
ILMN_6482	0.304206	0.0266	2.6961	-4.19589	0.696917	TNIK	TRAF2 and NCK interacting kinase
ILMN_6336	0.304424	0.0266	-2.69529	-4.19717	-0.474643	ALKBH6	alkB homolog 6
ILMN_6399	0.304966	0.0267	-2.69335	-4.20025	-0.559685	TAF5L	TATA-box binding protein associated factor 5 like
ILMN_7105	0.0448644	0.000952	-5.01185	-0.72672	-2.35837	ESRRG	estrogen related receptor gamma
ILMN_7153	0.304966	0.0267	-2.69269	-4.20129	-0.76146	TNPO3	transportin 3
ILMN_27992	0.304966	0.0267	2.6926	-4.20144	0.583108
ILMN_25398	0.304966	0.0267	2.69239	-4.20177	0.804105	PRR5L	proline rich 5 like
ILMN_4339	0.305002	0.0267	2.69196	-4.20245	0.643935	NRIP1	nuclear receptor interacting protein 1
ILMN_12685	0.305009	0.0267	2.69159	-4.20303	0.464113	ABHD17B	abhydrolase domain containing 17B
ILMN_17940	0.305908	0.0269	-2.68885	-4.20738	-0.590159	SLC9A3	solute carrier family 9 member A3
ILMN_23769	0.305908	0.0269	-2.68862	-4.20775	-0.630064	NFATC1	nuclear factor of activated T-cells 1
ILMN_23046	0.305908	0.0269	2.68846	-4.208	0.701209	SLC32A1	solute carrier family 32 member 1
ILMN_138760	0.305908	0.0269	2.68733	-4.20979	0.482051	DLX1	distal-less homeobox 1
ILMN_1033	0.305908	0.0269	-2.68725	-4.20991	-0.648056	CCNT1	cyclin T1
ILMN_16165	0.305908	0.0269	2.68707	-4.2102	0.447498	COMMD8	COMM domain containing 8
ILMN_10361	0.305908	0.0269	-2.68695	-4.21038	-0.393565	C1orf189	chromosome 1 open reading frame 189
ILMN_27276	0.305908	0.0269	-2.6869	-4.21047	-0.621888	KCNJ15	potassium voltage-gated channel subfamily J member 15
ILMN_20460	0.271953	0.0215	-2.83057	-3.98256	-2.39672	P2RX6	purinergic receptor P2X 6
ILMN_27331	0.306552	0.027	2.68486	-4.2137	0.450461	CHMP1B	charged multivesicular body protein 1B
ILMN_2367	0.306899	0.0271	-2.68379	-4.2154	-0.525846	STRADA	STE20-related kinase adaptor alpha
ILMN_27889	0.306906	0.0271	2.68342	-4.21598	0.951268	MYPN	myopalladin
ILMN_20959	0.307159	0.0271	-2.68255	-4.21736	-0.537939	PCDH19	protocadherin 19
ILMN_11551	0.307366	0.0272	2.68177	-4.2186	0.52047	CERKL	ceramide kinase like
ILMN_26198	0.307488	0.0272	2.68117	-4.21955	0.660905	ENTPD7	ectonucleoside triphosphate diphosphohydrolase 7
ILMN_748	0.307903	0.0273	-2.67917	-4.22272	-0.412782
ILMN_21184	0.307903	0.0273	-2.67836	-4.224	-0.452547	PURG	purine rich element binding protein G
ILMN_24318	0.307903	0.0273	-2.67833	-4.22405	-0.44288	ELMOD3	ELMO domain containing 3
ILMN_18141	0.307903	0.0273	2.67809	-4.22443	0.521295	LYRM4	LYR motif containing 4
ILMN_9651	0.307903	0.0273	-2.67759	-4.22522	-0.51887	TNFRSF21	TNF receptor superfamily member 21
ILMN_3183	0.307903	0.0273	-2.67751	-4.22535	-0.95869	SLCO4A1	solute carrier organic anion transporter family member 4A1
ILMN_2786	0.307903	0.0273	-2.67736	-4.22558	-0.543525	DEF8	differentially expressed in FDCP 8 homolog
ILMN_22183	0.0796783	0.00229	-4.34954	-1.65282	-2.41212	APLP1	amyloid beta precursor like protein 1
ILMN_1905	0.307903	0.0274	-2.67704	-4.22609	-0.57782	CD59	CD59 molecule
ILMN_4547	0.307903	0.0274	2.67649	-4.22697	0.685315	GOLGA7B	golgin A7 family member B
ILMN_20142	0.307903	0.0274	2.67646	-4.22702	0.736799	CEACAM1	carcinoembryonic antigen related cell adhesion molecule 1
ILMN_25290	0.307903	0.0274	-2.67573	-4.22817	-0.644639	MTUS2	microtubule associated tumor suppressor candidate 2
ILMN_21991	0.307903	0.0274	-2.67511	-4.22915	-0.457528	PXT1	peroxisomal, testis specific 1
ILMN_23658	0.307903	0.0274	2.67501	-4.22932	0.463169	PHF3	PHD finger protein 3
ILMN_7278	0.307903	0.0275	-2.67462	-4.22993	-0.538066	ATXN2	ataxin 2
ILMN_24869	0.307903	0.0275	-2.67425	-4.23052	-0.592224	GYG2	glycogenin 2
ILMN_16700	0.307903	0.0275	-2.67382	-4.2312	-0.786404	CENPU	centromere protein U
ILMN_1168	0.307903	0.0275	2.67378	-4.23126	0.644875	HRH1	histamine receptor H1
ILMN_27839	0.307903	0.0275	-2.6737	-4.23139	-0.516497	KIF18A	kinesin family member 18A
ILMN_3740	0.308855	0.0276	-2.67125	-4.23527	-0.484947	OR5D13	olfactory receptor family 5 subfamily D member 13 (gene/pseudogene)
ILMN_8199	0.308855	0.0276	-2.67105	-4.23559	-0.514692	PAF1	PAF1 homolog, Paf1/RNA polymerase II complex component
ILMN_6124	0.3089	0.0276	-2.67061	-4.23629	-0.408238	POLR2F	RNA polymerase II subunit F
ILMN_22176	0.309065	0.0277	-2.66992	-4.23737	-0.483128	UBE2G2	ubiquitin conjugating enzyme E2 G2
ILMN_20877	0.309109	0.0277	-2.66949	-4.23806	-0.416575	NAF1	nuclear assembly factor 1 ribonucleoprotein
ILMN_1564	0.309218	0.0277	-2.66832	-4.23991	-0.475321	COPS7B	COP9 signalosome subunit 7B
ILMN_30194	0.0420086	0.000845	-5.1063	-0.5999	-2.42043	ECHDC3	enoyl-CoA hydratase domain containing 3
ILMN_27603	0.309218	0.0278	2.66775	-4.24082	0.662626	ZNHIT1	zinc finger HIT-type containing 1
ILMN_21876	0.309218	0.0278	2.66755	-4.24113	0.501188	FBXL18	F-box and leucine rich repeat protein 18
ILMN_9224	0.309218	0.0278	-2.66728	-4.24156	-0.86691	IDH2	isocitrate dehydrogenase (NADP(+)) 2, mitochondrial
ILMN_16005	0.309218	0.0278	-2.66719	-4.24169	-0.433506	HOXC4	homeobox C4
ILMN_29952	0.309425	0.0278	2.66643	-4.24291	0.425563	USP6	ubiquitin specific peptidase 6
ILMN_24469	0.309565	0.0278	2.6658	-4.24391	0.587679	HACL1	2-hydroxyacyl-CoA lyase 1
ILMN_24642	0.310218	0.0279	2.66376	-4.24714	0.497302	DENND1B	DENN domain containing 1B
ILMN_24472	0.310218	0.028	-2.66313	-4.24813	-0.766208	TTK	TTK protein kinase
ILMN_5000	0.310218	0.028	-2.66275	-4.24873	-0.561785	CFAP61	cilia and flagella associated protein 61
ILMN_607	0.310218	0.028	-2.66246	-4.2492	-0.479973
ILMN_14082	0.310218	0.028	2.66211	-4.24975	0.416972	STAG2	stromal antigen 2
ILMN_3032	0.387532	0.0493	-2.30435	-4.81206	-2.43341	LIPF	lipase F, gastric type
ILMN_15669	0.310218	0.028	-2.6617	-4.25039	-0.440525	HOXC6	homeobox C6
ILMN_5215	0.310218	0.0281	-2.66109	-4.25136	-0.61162	SLC27A4	solute carrier family 27 member 4
ILMN_25552	0.310218	0.0281	2.66094	-4.25161	0.418654	HDAC3	histone deacetylase 3
ILMN_22251	0.310218	0.0281	-2.66044	-4.2524	-0.67865	SPATA8	spermatogenesis associated 8
ILMN_7330	0.310218	0.0281	-2.65994	-4.25318	-0.976205	PAPPA2	pappalysin 2
ILMN_25584	0.310218	0.0281	-2.65967	-4.25362	-0.724144	LARP6	La ribonucleoprotein domain family member 6
ILMN_1547	0.310218	0.0281	2.65928	-4.25423	0.392428	LATS2	large tumor suppressor kinase 2
ILMN_26103	0.310218	0.0282	-2.65841	-4.25562	-0.619026	BBS4	Bardet-Biedl syndrome 4
ILMN_24365	0.310218	0.0282	2.65803	-4.25622	0.476425	CCDC126	coiled-coil domain containing 126
ILMN_138011	0.310218	0.0282	2.65775	-4.25665	0.498411	LRRC24	leucine rich repeat containing 24
ILMN_3427	0.310218	0.0283	-2.65645	-4.25871	-0.938741	SLC9A3R2	SLC9A3 regulator 2
ILMN_13494	0.310218	0.0283	-2.6564	-4.25879	-0.919123	MELK	maternal embryonic leucine zipper kinase
ILMN_5522	0.125357	0.00448	-3.87135	-2.35995	-2.44919	LRRC17	leucine rich repeat containing 17
ILMN_29221	0.0308416	0.000545	-5.46035	-0.13613	-2.47755	ESRRG	estrogen related receptor gamma
ILMN_4309	0.310218	0.0283	-2.65572	-4.25987	-0.548911
ILMN_11130	0.310218	0.0283	2.65563	-4.26002	0.589414	MAGEB6	MAGE family member B6
ILMN_17780	0.310218	0.0283	2.65555	-4.26014	0.425667	HES5	hes family bHLH transcription factor 5
ILMN_25058	0.310218	0.0283	2.65512	-4.26081	0.495266	NUMA1	nuclear mitotic apparatus protein 1
ILMN_15153	0.310218	0.0283	-2.65509	-4.26087	-0.483447	RANGAP1	Ran GTPase activating protein 1
ILMN_10528	0.310218	0.0283	2.65486	-4.26123	0.661615	MPHOSPH10	M-phase phosphoprotein 10
ILMN_9517	0.310218	0.0283	-2.6548	-4.26133	-0.981997	ATP6V0E2	ATPase H+ transporting V0 subunit e2
ILMN_547	0.310218	0.0284	-2.65421	-4.26226	-0.535302	BIN1	bridging integrator 1
ILMN_9566	0.310218	0.0284	-2.65416	-4.26235	-0.585856	GDAP1L1	ganglioside induced differentiation associated protein 1 like 1
ILMN_20941	0.310218	0.0284	-2.65365	-4.26314	-0.487823	DEFB103B	defensin beta 103B
ILMN_16764	0.310218	0.0284	-2.65342	-4.26351	-0.407591	TUBD1	tubulin delta 1
ILMN_28557	0.310218	0.0284	2.65311	-4.26401	0.523137	AGFG2	ArfGAP with FG repeats 2
ILMN_1491	0.310218	0.0284	2.65286	-4.2644	0.685618	C11orf80	chromosome 11 open reading frame 80
ILMN_12476	0.310218	0.0284	-2.6526	-4.26481	-0.455377	MRPL41	mitochondrial ribosomal protein L41
ILMN_25264	0.310218	0.0284	-2.65255	-4.2649	-0.458329	ZNF160	zinc finger protein 160
ILMN_2416	0.310768	0.0285	-2.65085	-4.26758	-0.537199	GMPR	guanosine monophosphate reductase
ILMN_27569	0.310768	0.0285	2.65075	-4.26775	0.535882	FZD9	frizzled class receptor 9
ILMN_2759	0.311272	0.0286	-2.64903	-4.27046	-0.605515	TEX14	testis expressed 14, intercellular bridge forming factor
ILMN_26063	0.311272	0.0286	-2.64886	-4.27073	-0.472496	ME3	malic enzyme 3
ILMN_23841	0.311272	0.0286	-2.64871	-4.27097	-0.478768	GTSE1	G2 and S-phase expressed 1
ILMN_1587	0.311336	0.0286	2.64824	-4.27171	0.485967	RBM15B	RNA binding motif protein 15B
ILMN_7731	0.311403	0.0287	2.64743	-4.273	0.861571	C17orf97	chromosome 17 open reading frame 97
ILMN_1304	0.311403	0.0287	2.64714	-4.27346	0.432219	ARRB2	arrestin beta 2
ILMN_25412	0.311403	0.0287	-2.64694	-4.27377	-0.457037	B3GLCT	beta 3-glucosyltransferase
ILMN_10699	0.311403	0.0287	2.64676	-4.27406	0.465061	SNX22	sorting nexin 22
ILMN_17947	0.312028	0.0288	2.64515	-4.2766	0.596291	LRRC37A3	leucine rich repeat containing 37 member A3
ILMN_27071	0.31215	0.0288	2.64447	-4.27769	0.444219	NEDD4	neural precursor cell expressed, developmentally down-regulated 4, E3 ubiquitin protein ligase
ILMN_13090	0.31215	0.0288	-2.64423	-4.27806	-0.485368	EML3	echinoderm microtubule associated protein like 3
ILMN_25683	0.31249	0.0289	-2.64321	-4.27968	-0.531818	SYNC	syncoilin, intermediate filament protein
ILMN_9775	0.312533	0.0289	-2.64254	-4.28073	-0.49554	GTF2H4	general transcription factor IIH subunit 4
ILMN_19614	0.312533	0.0289	-2.6422	-4.28129	-0.448603	MCM3AP	minichromosome maintenance complex component 3 associated protein
ILMN_20970	0.312533	0.0289	-2.64212	-4.28141	-0.421408	GPR156	G protein-coupled receptor 156
ILMN_18627	0.312538	0.0289	2.6412	-4.28287	0.820885	TNFSF13B	tumor necrosis factor superfamily member 13b
ILMN_138879	0.312538	0.0289	-2.64109	-4.28303	-0.781891	FANCI	Fanconi anemia complementation group I
ILMN_24812	0.312538	0.029	2.64089	-4.28335	0.568642	ABHD14B	abhydrolase domain containing 14B
ILMN_11403	0.312538	0.029	-2.64074	-4.2836	-0.541546
ILMN_2334	0.312538	0.029	-2.64044	-4.28406	-0.466711
ILMN_30052	0.312574	0.029	-2.64004	-4.28471	-0.483068
ILMN_21014	0.312606	0.029	2.63896	-4.28641	0.477347
ILMN_14871	0.312606	0.029	2.63889	-4.28651	0.836176	NUDT8	nudix hydrolase 8
ILMN_4432	0.312606	0.0291	-2.63864	-4.28691	-0.513193	CKAP4	cytoskeleton associated protein 4
ILMN_14294	0.312606	0.0291	-2.63835	-4.28738	-0.509894
ILMN_14735	0.312606	0.0291	-2.63831	-4.28744	-0.468265	CAMSAP2	calmodulin regulated spectrin associated protein family member 2
ILMN_6597	0.312613	0.0291	2.63766	-4.28847	0.678903	PCSK5	proprotein convertase subtilisin/kexin type 5
ILMN_16766	0.0429026	0.000881	-5.07267	-0.6449	-2.51619	ZNF385B	zinc finger protein 385B
ILMN_22708	0.312613	0.0292	-2.63656	-4.2902	-0.621845	SRMS	src-related kinase lacking C-terminal regulatory tyrosine and N-terminal myristylation sites
ILMN_8281	0.176596	0.00849	-3.43677	-3.02686	-2.55719	TMED6	transmembrane p24 trafficking protein 6
ILMN_9472	0.312613	0.0292	-2.63574	-4.2915	-0.424376	LRCH2	leucine rich repeats and calponin homology domain containing 2
ILMN_3317	0.312613	0.0292	2.63551	-4.29187	0.507467	GAB2	GRB2 associated binding protein 2
ILMN_28398	0.312613	0.0292	-2.6355	-4.29189	-0.69697	CHAF1B	chromatin assembly factor 1 subunit B
ILMN_23974	0.312613	0.0292	2.63526	-4.29226	0.437483	STX7	syntaxin 7
ILMN_14464	0.312613	0.0292	-2.63521	-4.29235	-0.773014	SGO1	shugoshin 1
ILMN_17251	0.312613	0.0292	-2.6346	-4.29332	-0.57434	TES	testin LIM domain protein
ILMN_25002	0.312613	0.0292	2.63457	-4.29336	0.521183	HMGN4	high mobility group nucleosomal binding domain 4
ILMN_1862	0.312613	0.0293	-2.63432	-4.29375	-0.551017	DEFB119	defensin beta 119
ILMN_16361	0.0600768	0.00146	-4.68029	-1.18235	-2.56939	ORM2	orosomucoid 2
ILMN_20870	0.312628	0.0293	-2.63326	-4.29543	-0.48555	CBX6	chromobox 6
ILMN_137902	0.312628	0.0293	-2.63296	-4.2959	-0.440083	FAM71D	family with sequence similarity 71 member D
ILMN_1132	0.312628	0.0293	-2.63278	-4.29619	-0.888429	C15orf52	chromosome 15 open reading frame 52
ILMN_3680	0.0311874	0.000559	-5.43992	-0.1624	-2.63975	KLK11	kallikrein related peptidase 11
ILMN_27069	0.312628	0.0294	2.63207	-4.29731	0.628989	HPSE	heparanase
ILMN_21555	0.312628	0.0294	2.63199	-4.29744	0.590949	CARD16	caspase recruitment domain family member 16
ILMN_29862	0.31276	0.0294	-2.63139	-4.29839	-0.47387	CHST12	carbohydrate (chondroitin 4) sulfotransferase 12
ILMN_21374	0.313729	0.0295	-2.6291	-4.30202	-0.417445
ILMN_27823	0.314472	0.0296	2.62727	-4.30492	0.639767
ILMN_2331	0.31508	0.0297	2.6254	-4.30787	0.655802	PRIMPOL	primase and DNA directed polymerase
ILMN_1892	0.31508	0.0297	-2.62506	-4.3084	-0.45111	TXLNA	taxilin alpha
ILMN_17108	0.31508	0.0297	-2.62495	-4.30858	-0.735891	NUCKS1	nuclear casein kinase and cyclin dependent kinase substrate 1
ILMN_678	0.31508	0.0297	-2.62458	-4.30918	-0.421579	LCE1C	late cornified envelope 1C
ILMN_5665	0.31508	0.0297	2.6244	-4.30945	0.583279	GJA1	gap junction protein alpha 1
ILMN_14522	0.315342	0.0298	-2.6232	-4.31135	-0.439507	LOC400997	uncharacterized LOC400997
ILMN_3635	0.315342	0.0298	-2.62317	-4.3114	-0.43895	C10orf99	chromosome 10 open reading frame 99
ILMN_11756	0.315342	0.0298	-2.62289	-4.31184	-0.815479	ASPHD1	aspartate beta-hydroxylase domain containing 1
ILMN_139381	0.315497	0.0298	2.6222	-4.31294	0.53034	TMEM19	transmembrane protein 19
ILMN_7267	0.315497	0.0298	-2.62193	-4.31336	-0.418959	P3H1	prolyl 3-hydroxylase 1
ILMN_21305	0.315667	0.0299	2.62126	-4.31442	0.523236	MYOZ3	myozenin 3
ILMN_13146	0.315904	0.0299	2.62046	-4.31569	0.468979	DNPEP	aspartyl aminopeptidase
ILMN_11281	0.316174	0.03	-2.61937	-4.31741	-0.511746	UBA1	ubiquitin like modifier activating enzyme 1
ILMN_2631	0.316174	0.03	2.61926	-4.31758	0.512711	MTCH2	mitochondrial carrier 2
ILMN_9096	0.316764	0.03	2.61767	-4.32011	0.739034	RND3	Rho family GTPase 3
ILMN_2452	0.316764	0.03	-2.61743	-4.32049	-0.469566	SRPRB	SRP receptor beta subunit
ILMN_18642	0.316769	0.0301	2.61709	-4.32102	0.403972	HCFC1R1	host cell factor C1 regulator 1
ILMN_6133	0.316786	0.0301	-2.61628	-4.32231	-0.498474	SUV39H1	suppressor of variegation 3-9 homolog 1
ILMN_15681	0.316786	0.0301	-2.61626	-4.32233	-0.426776
ILMN_29922	0.316786	0.0301	-2.61608	-4.32261	-0.854923	MXRA5	matrix remodeling associated 5
ILMN_11711	0.316851	0.0301	-2.61536	-4.32376	-0.45431	ZKSCAN3	zinc finger with KRAB and SCAN domains 3
ILMN_23396	0.316851	0.0301	-2.6153	-4.32385	-0.778898	EBI3	Epstein-Barr virus induced 3
ILMN_20479	0.0081089	8.35e-05	-7.15934	1.84753	-2.68363	SIGLEC11	sialic acid binding Ig like lectin 11
ILMN_17616	0.317007	0.0302	-2.61434	-4.32537	-0.726296
ILMN_29008	0.0455712	0.000989	-4.98214	-0.7669	-2.69355	CKM	creatine kinase, M-type
ILMN_27692	0.317643	0.0303	2.61222	-4.32872	0.465159	TDRD7	tudor domain containing 7
ILMN_5731	0.0394598	0.000764	-5.18638	-0.4934	-2.70163	TRIM74	tripartite motif containing 74
ILMN_16432	0.317934	0.0304	-2.61087	-4.33086	-0.405673	DAG1	dystroglycan 1
ILMN_6059	0.317934	0.0304	2.6108	-4.33096	0.469241	SEPSECS	Sep (O-phosphoserine) tRNA:Sec (selenocysteine) tRNA synthase
ILMN_4340	0.317934	0.0304	2.61019	-4.33193	0.391877	IGLL1	immunoglobulin lambda like polypeptide 1
ILMN_25688	0.317934	0.0304	-2.60967	-4.33276	-0.394733	KRT6A	keratin 6A
ILMN_28000	0.317934	0.0304	-2.60963	-4.33282	-0.450055	CABLES2	Cdk5 and Abl enzyme substrate 2
ILMN_15128	0.317934	0.0304	2.60958	-4.3329	0.527688	C1orf168	chromosome 1 open reading frame 168
ILMN_8974	0.0159631	0.000215	-6.26432	0.85049	-2.70942	CKMT2	creatine kinase, mitochondrial 2
ILMN_2984	0.317988	0.0305	-2.60883	-4.33409	-0.509014	ZNF546	zinc finger protein 546
ILMN_26939	0.318238	0.0305	-2.60801	-4.33539	-0.601211	IL18BP	interleukin 18 binding protein
ILMN_29690	0.318282	0.0305	-2.60757	-4.33608	-0.601653	HIPK2	homeodomain interacting protein kinase 2
ILMN_16228	0.318282	0.0305	2.60723	-4.33661	0.615447	CIR1	corepressor interacting with RBPJ, 1
ILMN_23894	0.318282	0.0305	-2.60696	-4.33705	-0.702592	GINS4	GINS complex subunit 4
ILMN_7790	0.318311	0.0306	2.60658	-4.33765	0.441949	USF2	upstream transcription factor 2, c-fos interacting
ILMN_19985	0.0478773	0.00106	-4.92959	-0.83826	-2.73771	KCNE2	potassium voltage-gated channel subfamily E regulatory subunit 2
ILMN_10198	0.318591	0.0307	-2.60459	-4.3408	-0.473294	SLAIN1	SLAIN motif family member 1
ILMN_2271	0.318591	0.0307	-2.60454	-4.34088	-0.48261	RPL13	ribosomal protein L13
ILMN_28390	0.318591	0.0307	-2.60423	-4.34136	-0.420288	GPRC6A	G protein-coupled receptor class C group 6 member A
ILMN_22627	0.318591	0.0307	-2.60411	-4.34155	-0.701386	PYGL	phosphorylase, glycogen, liver
ILMN_5551	0.318591	0.0307	-2.60409	-4.34158	-0.567122
ILMN_25685	0.319109	0.0307	-2.60274	-4.34371	-0.470708	SIPA1L3	signal induced proliferation associated 1 like 3
ILMN_19558	0.319159	0.0308	2.60232	-4.34438	0.552555	RIOK3	RIO kinase 3
ILMN_25402	0.319629	0.0308	-2.60102	-4.34644	-0.712846	FARSB	phenylalanyl-tRNA synthetase beta subunit
ILMN_4121	0.319629	0.0308	-2.60074	-4.34689	-0.74094	ADAM28	ADAM metallopeptidase domain 28
ILMN_10833	0.319629	0.0309	-2.60041	-4.3474	-0.485414	MAMSTR	MEF2 activating motif and SAP domain containing transcriptional regulator
ILMN_9584	0.319629	0.0309	-2.59957	-4.34873	-0.41304	MRFAP1L1	Morf4 family associated protein 1 like 1
ILMN_3774	0.319629	0.0309	2.59928	-4.34919	0.401137	RNF146	ring finger protein 146
ILMN_16804	0.319629	0.0309	2.59897	-4.34968	0.591514	FBP1	fructose-bisphosphatase 1
ILMN_12644	0.319629	0.0309	2.59895	-4.34971	0.452388	ATP5SL	ATP5S like
ILMN_7913	0.319629	0.0309	-2.59883	-4.3499	-0.436043	PDHB	pyruvate dehydrogenase (lipoamide) beta
ILMN_14283	0.319771	0.031	2.5979	-4.35138	0.618399	CBLN4	cerebellin 4 precursor
ILMN_10515	0.319771	0.031	2.59762	-4.35182	0.468687	MARK4	microtubule affinity regulating kinase 4
ILMN_3036	0.319771	0.031	-2.5976	-4.35185	-0.417235	STIM1	stromal interaction molecule 1
ILMN_23286	0.319772	0.031	-2.59728	-4.35236	-0.556422	HYAL3	hyaluronoglucosaminidase 3
ILMN_2380	0.320057	0.0311	2.59639	-4.35375	0.416978	RET	ret proto-oncogene
ILMN_18032	0.320107	0.0311	-2.59598	-4.35441	-0.382776	SLURP1	secreted LY6/PLAUR domain containing 1
[truncated: 18,590 more rows]

## Sheet: up
APOA4
DEFA5
RBP2
CLCA1
GAST
DEFA6
MEP1A
SPINK4
GBA3
SI
ZG16
MTTP
ANPEP
FABP1
SLC7A9
TM4SF20
REG1B
SLC26A3
CPS1
CDH17
TFF3
MS4A10
APOC3
OTC
CHP2
MEP1B
APOB
C17orf78
ITLN1
APOA1
TMPRSS15
CDX1
SLC51A
SLC2A2
ADH4
DEFA1
FOLH1
SLC3A1
NAT2
CCL25
SLC39A5
PNLIP
PRAP1
CYP3A4
GIP
ALDOB
CLDN3
GUCY2C
MME
LRRC19
TM4SF4
CAMK2N1
DPP4
SLC2A5
VIL1
SLC5A1
CDX2
ADGRG7
CLRN3
TUBAL3
ABCG8
CLDN15
HKDC1
REG4
SLC51B
GCG
ACE2
CEL
GPA33
FABP2
PLA2G12B
DDC
ITLN2
ENPEP
SLC15A1
OLFM4
ANXA13
ABCA4
UGT1A1
REEP6
SERPINB5
CHGB
FOLH1
CREB3L3
A1CF
C8G
UGT2A3
TRIM15
SCG2
CLDN7
S100G
MALL
RNF186
MS4A8
HEPH
SSUH2
ALPI
SLC35G1
PRR4
KHK
CLPS
SLC17A8
TLDC2
EDN3
BCO1
BTNL3
NAT8B
REG3G
RGS2
CGA
PLA2G2A
MYRFL
MARVELD3
NPC1L1
PDZK1
CIDEB
ADH6
ACOX2
MOGAT2
SLC23A3
PFKFB4
AOC1
DSG3
EPDR1
PCK2
SLC6A4
GSTA5
SLC19A3
PRODH
MOGAT3
UGT2B7
FLVCR2
HEPACAM2
MLN
EPHB1
NR5A2
DHDH
ABCG2
EPB41L3
XPNPEP2
C2orf88
NAALADL1
WDR72
CCK
GPD1
ACOT7
CPO
CLDN2
SLC52A1
SCG5
CYP27A1
SLC39A4
PCK2
AGMO
KBTBD11
KHK
GK
MARVELD3
XDH
ABCB1
OTOP3
METTL7B
DHRS11
PHLPP2
FUT6
ACMSD
PHYHIPL
PCK1
CCND2
PCSK1N
FUOM
MPP1
CTRB2
PPP1R14D
CFTR
NT5E
TSSK2
ENPP3
CNTNAP2
HSD17B2
ILDR1
CIB2
CDA
SFRP5
LAMA1
CEACAM1
RUNDC3B
LPL
ESPN
C6orf58
PEPD
UGT2B11
SLC30A10
PLEKHS1
DEPDC7
PIPOX
NR1H4
DGAT1
DKK4
ONECUT2
ZNF703
HAPLN4
PPP1R14C
DPEP1
SLC46A3
HNF4G
TREH
CHN2
IYD
B3GNT8
SLC1A1
CYBRD1
LCN15
UGT2B17
DMBT1
YBX2
AQP11
TMEM82
UGT2B10
TNFRSF12A
SLC25A34
SHD
CEACAM6
SULT1A2
LCT
TM6SF2
PCSK1
APOBEC1
SLC27A2
MATN2
TM4SF5
SCGN
HTR4
MATN2
BAIAP2L2
SLC4A7
SOX6
OAT
NPNT
CASP5
FOLH1B
TRIM36
CELA2A
TMEM200A
NELL2
KCNK16
SLC13A2
BEST4
MESP1
ACY3
TDP2
POM121
EPHX2
MFSD2A
PRSS2
GLTPD2
GSTM4
GPD1L
EMB
HSD17B11
MYO1A
PPP1R1B
MUC13
ULBP1
TFAP2A
TMEM139
CCDC170
C3orf70
GUCA2A
ACY1
DNASE1
PLS1
NAGS
TPSG1
AKR1C4
SOWAHA
FAR2
PSG11
CLIC5
SEMA6A
HHLA2
TFPI2
CASP1
SERPINA1
ZNF488
RBKS
HSD11B2
RARRES1
TBX3
TKFC
PMP22
MISP
FAM3C
LPGAT1
TPK1
BPIFB1
IL32
HMOX1
NKX2-2
VNN1
PODNL1
MAOB
KLK12
NAT8
CRYL1
CD160
SERPINA1
TNNC2
ASCL2
PAX6
CALML4
CD55
ATP1B3
GALM
LRRC75A
CYP2J2
AGPAT2
GLS
LRRC66
MAP1LC3A
F12
FGL2
CDHR2
HOXB7
SLC5A9
GUCA2B
VIPR1
ANTXR2
FREM1
PECR
SLC17A4
PRSS3
AQP1
TRHDE
SLC9A3R1
HEBP1
ACAA2
BST1
B4GALT6
CELF3
KLHL13
SLC23A1
RARRES1
XRCC4
AGMAT
SERPINE2
CRYBA2
DUSP6
CA1
CIDEC
CASP1
IL22RA1
TRIM10
GIPC2
ACAD11
PMP22
SULT1E1
LMX1A
DNAJC12
CES2
PLIN2
PDSS1
ABAT
TTLL6
SULT1A3
C1orf115
EPCAM
LUZP1
GATM
KLK1
CD36
DAZAP1
PDK3
TMEM25
PAPSS2
TTBK1
ZNF462
KDM8
SKAP2
GDA
NTRK1
F2RL1
TMEM176A
SMOC2
GPR35
AMPD1
EDAR
CNDP1
B3GNT5
PNLIPRP1
ETHE1
NMU
SUCNR1
MGAM
UGT1A8
SLC1A7
MAN1A1
SLC29A4
SPON1
LIPA
CCL24
FEV
ANKS4B
ACSL5
TPSAB1
PID1
SEC14L2
CA13
NLRP6
C4orf3
TNFRSF17
SLC39A8
BMP6
C8A
ABCG5
ACE
SOAT2
PKDCC
TSPAN7
GNLY
CELA2B
MGAT4A
ASS1
STRADB
UNC5D
ATP2C2
BDKRB1
SH3BP1
EFHC2
SEC23A
TRIM6-TRIM34
SLC25A15
DNAJC12
DFNA5
SLC28A1
UGT1A7
TINAG
MYB
GOLT1A
GALC
ELOVL7
RNF125
PDXP
CLDN1
ETS2
TFPI
S100A10
SLC36A1
UGT1A10
SLC16A4
TRIM54
KRT72
CTSZ
SLC37A2
MS4A4A
C9
KRT81
TBX10
ENPP7
C2orf82
SRI
DACH1
PON2
CRYM
ARHGAP4
XPR1
INSM1
PEX11A
GDPD2
SPSB1
TBCB
PSG9
ADIRF
ABCD1
CAMK1G
GNG12
FCGRT
LRMP
MGST2
HTR2B
PDE5A
ARSE
CPE
PSORS1C1
SLC10A2
ANO6
MAF
LAPTM4B
PPP1R1B
UBE2I
F5
EPHB2
MB
TFPI
GLRX
EMC7
CDK12
SLC40A1
TCERG1L
RFX6
FAM83A
GSTM4
SLC22A4
SLC52A3
G6PC
ANO3
USH1C
CD8B

## Sheet: down
GABARAPL1
LAMB2
SCN2A
BCAT2
ISLR
LINGO2
NR2F2
DUSP19
APOBEC3B
TEAD2
PPP4R4
ISL1
SLC1A2
KCNN2
ST3GAL1
C10orf11
DGKD
WRAP53
BLVRB
CDT1
GNL3
NIM1K
SLC2A6
IQGAP3
RRBP1
SULT1C2
RPS23
UGT1A3
MUM1L1
PKIB
HYAL1
CYB5R1
EDA
RNF213
NFIC
CXCL17
ST3GAL6
C16orf78
ANO1
COL16A1
AZGP1
PTP4A3
IRAK3
DUOXA1
RDX
NCAPD2
ERCC6L
LOC81691
SNTB1
GPBAR1
ACSM5
PPP1R3C
CYFIP2
DBT
CHRM3
LAMC2
RASIP1
HTR1E
PLIN5
SYN2
TM7SF2
CWH43
IMPDH1
KCNIP3
PAQR5
SLC25A4
HPN
BHMT
FXYD4
PHGDH
EYA1
KIAA0895
ATP5G1
UGT1A6
TAF13
DDX17
E2F8
ODAM
GSTM3
FARP1
GPT2
GLUL
PLTP
GREM2
CMTM7
MAST4
DCAF12L1
MAP4
PDZD9
FGB
ABCC5
SLC41A1
CUX2
G0S2
DRD5
PCDH7
ADHFE1
BIRC3
FGG
FBXO27
GCKR
RNLS
HIST2H2BF
DBN1
DUOX1
ZNF467
LIFR
KCNIP4
KIAA1958
CTIF
POPDC3
C12orf42
IRX5
LARP6
GABRP
RDH12
WDR86
MSMB
HSPA5
FAM20A
SCUBE2
IGFBP5
SLC4A2
GPRC5C
SMARCD3
HSPA1A
CBS
CHURC1
CA12
PNPLA7
RAP1GAP
CXCL13
LEPR
SLC26A7
KLK11
KCTD8
WASF3
RIMS3
HOMER2
REC8
XYLT2
ZBTB16
PTGER3
RAB11FIP2
EIF5A2
GAMT
ACADL
SLC26A7
CGNL1
SLC26A9
SMIM11A
IRX3
IL33
GHR
SPRR2F
THAP10
CXCL11
FGG
GPC3
IGFALS
ENPP5
COL2A1
HPN
UBD
CXCL5
ANGPTL3
FAM150B
SCNN1G
CA9
GPER1
PDIA2
TPD52L1
PAK3
LTF
SLC2A12
EEF1A2
SERPINA5
SPRR1A
LEPR
DUSP4
CNTD1
IRX2
DUOXA2
DNER
GBGT1
RNF208
HACD1
FNDC5
CHST3
AQP4
EDARADD
ST3GAL1
CCKBR
HSPB8
SBSPON
ESRRG
P2RX6
APLP1
ECHDC3
LIPF
LRRC17
ESRRG
ZNF385B
TMED6
ORM2
KLK11
SIGLEC11
CKM
TRIM74
CKMT2
KCNE2
CDH2
RBPMS2
CLCNKA
MFSD4A
APOBEC2
TRIM50
CPA2
GIF
ORM1
RPRM
CLIC6
CKB
FGA
SH3GL2
PDILT
ETNPPL
PTGER3
AQP4
ATP4B
OGG1
ATP4A
CHIA
MRGPRD
CHIA
