# Supplementary material for: Identification of DEGs and transcription factors involved in H. pylori-associated inflammation and their relevance with gastric cancer
Source: PeerJ. 2020 Jun 3;8:e9223. doi: 10.7717/peerj.9223 (PMC7275685; doi:10.7717/peerj.9223)
Supplement: Table S3 — For the data set with accession number GSE60662, four replicates of the control were included as Hp−-No, four replicates of mild gastritis and four replicates of severe gastritis as Hp+-NAG. GEO2R was undertook to screen DEGs between Hp−-No and Hp+-NA G. [file peerj-08-9223-s003.xlsx]

## Sheet: 60662
ID	adj.P.Val	P.Value	t	B	logFC	SPOT_ID	GB_ACC	SEQUENCE
A_23_P92928	0.036907	0.000492	-4.73135	0.13002	-4.2609	A_23_P92928	NM_000065	AACAGGAAGATGGAAATACTGCATCCTGGAAAGTGTTTGGCCTAGCACAATTACTGCTAG
A_33_P3415310	0.040179	0.000577	-4.63813	-0.02371	-3.88628	A_33_P3415310		CTGGCCTATGTGTCAACTGTGATCTTCATCATCACAAGATGTTGCCTGTTTTCTTTCTGA
A_24_P49199	0.182538	0.0125	-2.93592	-2.9777	-3.37812	A_24_P49199	NM_181789	AGGTGAAAAGTCAAATGAAACAGTACAATTCTTGATGAGTGAGGTGTCATCTTCCAACCA
A_24_P695306	0.02682	0.000283	-5.05932	0.66089	-3.23017	A_24_P695306	NM_001136002	GTGTGTACCAGGACCTAATTTCCAACGTGTTGTGGAGGGTGCAGTACGTACCAGCTAACT
A_23_P76386	0.131419	0.00643	-3.29496	-2.3438	-3.17083	A_23_P76386	NM_003044	GGAAGTGACAACTGAACACACTGTGTTGGATCGGAGGTTCCGTTAGGGGATCCTTCCTTA
A_23_P163402	0.172528	0.0112	-2.99554	-2.87281	-3.09805	A_23_P163402	NM_000499	GGTAAAACAGGGCCACATAGATGCTGATGGAGCCTTCCCAAGTTGTGCTTGAGCCAGGAG
A_24_P185368	0.041575	0.000617	-4.59941	-0.08791	-3.01055	A_24_P185368	NM_152677	TGCCCCAAGGTCTTTAAGTATCTCTGTCACTTATTAGCTCACCAGAGAAGACACAGGAAT
A_33_P3370521	0.22146	0.02	-2.68183	-3.42121	-2.87678	A_33_P3370521	XM_001721393	TCACTGCTGCTGCTCAGCAGGCCTGCCAAGTGGTTCTGCTGTGTTCTAGGAGAAACAGGA
A_24_P321709	0.079871	0.00242	-3.8282	-1.40463	-2.75765	A_24_P321709	NM_015163	TCCAAACAATGTTTGGAAAAACATGGGACTGTATGTCATTACTATGACTGATAGCAGAAT
A_23_P53137	0.227764	0.0212	-2.65	-3.47623	-2.73898	A_23_P53137	NM_000559	ACTGAGCTCACTGCCCATGATGCAGAGCTTTCAAGGATAGGCTTTATTCTGCAAGCAATA
A_33_P3420446	0.234238	0.0225	-2.61819	-3.53108	-2.68401	A_33_P3420446	NM_001161528	TAACTGCTGCTGCTTTAAGAGATCAACTAATTCGAGCACTAACTATGATAGGAGCATATG
A_33_P3672756	0.041575	0.000618	-4.59868	-0.08912	-2.65075	A_33_P3672756	XR_112106	CACATCCTAAGCCATCCAAAAGAGTTGGTTATATGATTGTCTTTGAATTCTATGACTGTT
A_23_P71480	0.102683	0.00393	-3.56248	-1.87107	-2.52646	A_23_P71480	NM_005218	GCACCTGTTACAGAGGGAAGGCCAAGTGCTGCAAGTGAGCTGAGAGTGACCAGAAGAAAT
A_33_P3378318	0.038127	0.000529	-4.68836	0.05927	-2.49394	A_33_P3378318		CTTTCTATGCAGCCTGTTGGCCCACATTGTCCTGGCCGATGCAGTTGAGAGGGAGAAGCA
A_33_P3364062	0.060501	0.00135	-4.15142	-0.84478	-2.47592	A_33_P3364062	XR_109966	TGTTGGGTACGTTGTAAGGCAAGGGAGACACAGAAGTCCTAAAGGCAATAAAGCTTTTCC
A_23_P348253	0.286536	0.0363	-2.35691	-3.97459	-2.45042	A_23_P348253	NM_152750	AAGACTGTTAACTTTGGGGTGTGGAATTGTTGTGTTTCTTCTTTGCATTGACTGCTAGGA
A_24_P148907	0.086942	0.00285	-3.7375	-1.56333	-2.44627	A_24_P148907	NM_006439	CAACTACCACATGAAGACGCTGCTGCTGTACGAGTGCGAGAAACACCCACGAGAAACGGA
A_33_P3299791	0.075416	0.00211	-3.90331	-1.27367	-2.43747	A_33_P3299791		CCAGAAGAAGAAGATGAGCTTCAGTTATTCTAGCACAACTGCTGTGATATTTGTAAATAT
A_23_P17438	0.201428	0.0158	-2.81039	-3.19766	-2.42124	A_23_P17438	NM_207032	AAGTTATTACAGGTATAAAAGTGATGACCTATCATGAGGAAATGAAAGTGGCTGATTTGC
A_33_P3362791	0.268631	0.031	-2.44327	-3.82953	-2.37202	A_33_P3362791	XM_001719518	ACTGAATCTTTTGGCTGCCACGGATGTCAGGGAGCCAACGGGACTGGGTTTTGGTTGGGT
A_33_P3297545	0.134718	0.00684	-3.26136	-2.40325	-2.36025	A_33_P3297545		AGACCCAGGCATGGGGCTGAGACTGATTTACTACTCAGCTGCTGCTGGTACTACTGACAA
A_23_P87363	0.106967	0.00429	-3.5137	-1.95711	-2.35575	A_23_P87363	NM_004314	CTGAGGATGTTGGCCATGTGTGCTTCAGTGTAACCAAGATTCCTGTCAATCCCATCTGCA
A_33_P3312499	0.287731	0.0366	-2.35193	-3.98292	-2.34779	A_33_P3312499	NM_001098835	AGATGAGATGGCTTGTCTCATCCACACCACAGAAGGAAATAAACCATGTGGCTTAAATTT
A_33_P3373273	0.225262	0.0207	-2.66338	-3.45312	-2.32703	A_33_P3373273	NM_005073	TGTGTTTAAATTATGGATAACTCGAAAGACAGCTCAGGTGAAGGCCAGTAATGATTTTTT
A_33_P3264960	0.174401	0.0114	-2.98349	-2.89403	-2.31246	A_33_P3264960		AACACAATCCCAATGGTAAGTTCCACATGGGACGAGGGCTGTGGGACAGGTGCCACCTGT
A_33_P3398196	0.062011	0.00143	-4.1209	-0.89721	-2.30338	A_33_P3398196		TATAGGTTTCCACCAAAGACTGCTGCTGTTACCAAAGACTGCTGCTATTAACCCTTGACA
A_23_P215997	0.227978	0.0214	-2.64696	-3.48149	-2.29923	A_23_P215997	NM_000498	TGAGGATCAGAGCGTTTGTTCCCCCATGAAAGGGGAAATACTTAGGTAATCATTCCAGGT
A_24_P194661	0.061104	0.00138	-4.13878	-0.86648	-2.29196	A_24_P194661	XR_108456	GGTCCCATTACTTTAGGGGTAGTTAGATATCTCTGTATAACACCTATATATAATAACTCC
A_24_P492083	0.310072	0.0444	-2.24591	-4.1584	-2.29133	A_24_P492083	AF150244	CTTTAAATATTTAATCCTGAACATCCCTACGAAACAAATAATAAAACAGCCCTAGGCTCC
A_33_P3236117	0.054173	0.00109	-4.2719	-0.63884	-2.27065	A_33_P3236117		CACTTACAGGACAAATACACCAAGGGGATGGAAGGGAAGAAATAAAGGAATCCAGGACCT
A_33_P3303925	0.116561	0.00496	-3.43521	-2.09575	-2.25609	A_33_P3303925		GGAAACCAATTCATAGGAATAAAAGCACATATGTGTGCATGCTTATGTGCACGCAACGCA
A_33_P3777207	0.022353	0.000202	-5.26353	0.98327	-2.255	A_33_P3777207	NM_033467	GTCAGAGTGCATGATCTACCAGTACGGCAACTACTCCTGGGACCTGGCAGACGAACAGAA
A_33_P3320022	0.005541	7.51e-06	-7.48664	4.06788	-2.23124	A_33_P3320022	NM_001034845	ATTTAGGGACTTTTCAAAACAACTGCTGAGCTAATAAATCCTAGCATTTCTCAGGTCAAA
A_33_P3300158	0.056681	0.00119	-4.22397	-0.72057	-2.23106	A_33_P3300158	AK094659	TCCACAGGAGGCTGGGCTCCCTGGTCACAGGCAGTCCCGTGGAGCGGGTTTCACTCTTAG
A_33_P3260362	0.201361	0.0157	-2.81239	-3.19417	-2.22358	A_33_P3260362		TTTGAAAAGAGGATGAGGGCAGTGCTGAGAAGCAGATTATCCTCCAACAAAGACCACCAA
A_33_P3320017	0.044343	0.000707	-4.52084	-0.21881	-2.22125	A_33_P3320017	NM_001034845	CCTCTCTCTGAGACTCAGCAGTGGATTTTTGAACACATTAATATGACTGTTTTAGAAAAA
A_33_P3347201	0.042746	0.000651	-4.56815	-0.1399	-2.20941	A_33_P3347201	BC045679	GGTTAAAAATGCTGCTTCCTTTGACCTTTATGAATTTCTGTACCTTTGTCATTCTGTTAC
A_33_P3419912	0.015972	0.0001	-5.70165	1.65287	-2.20428	A_33_P3419912	NM_001199815	AATGTGGGATAGAGACCCCAAAATTCCTGTTCAGAACCTAAGCTTAGCTCTCTGTTGGCA
A_23_P253597	0.261921	0.0291	-2.47907	-3.76891	-2.20112	A_23_P253597	NM_030891	ACGAGATCGCCTGCCACACCTCAGTGCAGGAGGAGTTTGTGGGGAAGCCTCTGGTTCAGG
A_33_P3376321	0.237126	0.0231	-2.60463	-3.55441	-2.18288	A_33_P3376321	NM_020477	ATCTGTACACAGCCCTGCAGAGCATTGACCGTGGCGAGATCGTGAACATGCTGGAGGGTT
A_23_P311780	0.077286	0.00224	-3.86954	-1.3325	-2.16459	A_23_P311780	BC034629	ACCCGACAAGCACCCAGACTCTTTCACATAACAAATAAAATAGCAGAGTTCCCTTTCAAA
A_32_P38645	0.077975	0.00227	-3.86208	-1.34549	-2.15401	A_32_P38645	NM_182970	AGGTCAGAATGGAGCCGAACCCAGGGCTGTGAGCATCACCTCTGGAGCCCTTTCACTTTA
A_33_P3406677	0.294139	0.0392	-2.31502	-4.04433	-2.12756	A_33_P3406677	NM_000673	AGAAATGACAGGCAACAACGTGGGATACACCTTTGAAGTTATTGGGCATCTTGAAACCAT
A_33_P3210556	0.03213	0.00039	-4.8684	0.35378	-2.12402	A_33_P3210556	NR_028139	CAGGTGTTCATTTTCCTTTTGTAGTACCTTTCCTCAGCATGCAATTAATACAAAAAGAAC
A_23_P140384	0.147574	0.00818	-3.16486	-2.57393	-2.12245	A_23_P140384	NM_001911	TGTGACTGACTCTTCTTCTCGGGGACACAGGCCAGCTCCACAGTGTTGCCAGAGCCTTAA
A_33_P3382031	0.113175	0.00474	-3.45965	-2.05255	-2.12069	A_33_P3382031	NM_001098844	GAGCAATATACCACTTAGAAGCTACAGAACTTAAAAATGGCTACTTATACTCCATAGAAG
A_33_P3238280	0.100334	0.00373	-3.5898	-1.82292	-2.11914	A_33_P3238280	NM_031913	AGATGTTGCAGTGAAAAATAGTAGGCCACTTGGCTCACACAGAAGAAAGGAGTTAGGAAA
A_33_P3323914	0.018122	0.000129	-5.54167	1.4119	-2.11795	A_33_P3323914		ATAGGGAAGCCCATGCCGGAGCTGAAAACCTGCAACAACAAAAAAGCATCTAAATACTGC
A_24_P251950	0.011485	4.37e-05	-6.24138	2.4357	-2.1147	A_24_P251950	NM_174914	TGGCCAAAAATCATCCTTTCCACTTGCTAATTTTGCTACAAATTCATCCTTACTAGCTCC
A_24_P68088	0.199544	0.0154	-2.82216	-3.17709	-2.08792	A_24_P68088	NR_002947	CTCCCAAATCAGTCAAGAAATGTTCACTGGAATGTTGCTATGGTAAAAATAAAAGTGGTT
A_33_P3311267	0.125849	0.00584	-3.347	-2.25172	-2.04773	A_33_P3311267	NM_181608	GGAGATGGCTGCTGCTGCCCATCATGCTACAGAAGATATAGATTCACTGGCTTCTACTAA
A_24_P412734	0.128917	0.00615	-3.31847	-2.30221	-2.03727	A_24_P412734	NM_173502	TGGCTGCTGCTGTCTCCATCTTGACACAACGAATCTGTGACTGCCTCTATCAGGGCATCC
A_23_P73571	0.107354	0.00432	-3.51086	-1.96212	-2.03539	A_23_P73571	NM_152423	ATGATATAAATGCCAACTGGCAAGTCATTCCAAACTGCTTGAAGGAGTAGATGAACCAGA
A_33_P3217357	0.129192	0.00618	-3.31632	-2.306	-2.03322	A_33_P3217357	XR_110140	GTACTTGATTCACACATAATGCCCTCCATTTACTGCTTTCAAGAAATAACCTGTTTCTAA
A_23_P130677	0.054173	0.00109	-4.27145	-0.6396	-2.0178	A_23_P130677	NM_018687	CTGAATCTGCCTGGATGGAACTGAGGACCAATCATGCTGCAAGGAACACTTCCACGCCCC
A_33_P3371305	0.068734	0.00177	-4.00178	-1.10275	-2.01206	A_33_P3371305		CCTAAAAGCAGACATTAAACAATAAAATGCCACCACATACCTTGCCCACAAAATAAAATC
A_33_P3302786	0.152586	0.00875	-3.12812	-2.63888	-2.0055	A_33_P3302786	AK125311	TGACTAAAAATGGTATGGGAGGGGCATCCCAGAGAAAGAAGATGCAAAGTTGAGCTGACA
A_33_P3780505	0.063608	0.00151	-4.08914	-0.95186	-2.00144	A_33_P3780505	NR_003658	CCCATTTACTATGTCTGTTTTCTTAAATGAAATATGGGAATGATAATAAACATTGTTGGC
A_24_P247849	0.128356	0.00611	-3.32249	-2.29509	-1.97058	A_24_P247849	AK093508	GATGCCAACTAAATAGGCAGAAATTTTTACAAAAGCTGCCAGAGTTTAGAAACCACCCAG
A_33_P3262977	0.06202	0.00143	-4.11939	-0.8998	-1.96238	A_33_P3262977	NM_001079858	TTTTATTCTCGGCAACATCTGGAGAAGCATAAGCTAATTAAGGGCGATGATTATTATTAC
A_33_P3548190	0.003766	2.87e-06	-8.23112	4.93493	-1.95256	A_33_P3548190	NR_034024	GGGGGTATTTCTTCTGTACAGACAATTGGCCTGGTTATTGTCTAAAGGTATTTAAAATTA
A_33_P3330149	0.251354	0.0263	-2.53331	-3.67659	-1.95093	A_33_P3330149	NM_000280	GTCCAATCATTTTGTGCATCTAGAGTTCATTCCTAATCAATTAAAAGTGCTTGCAAGAGT
A_23_P352799	0.292814	0.0386	-2.32343	-4.03036	-1.94141	A_23_P352799	NM_001099456	CGTGGGTTCAGGAGCTGTGGGAGACGCGACGCAGGAGCTCCCAGGCAGGGATCCCCGTCC
A_23_P38328	0.1347	0.00677	-3.26649	-2.39418	-1.9393	A_23_P38328	AK023149	AGTGAGGATTCTGCACGTGGATGGTACCCTTTCTGTGCTGGGCTCCTGTGGAGGGAGAAT
A_23_P1575	0.278029	0.0339	-2.39419	-3.91218	-1.93461	A_23_P1575	NM_020358	TGTAGGGGACTCCTGGAATTGGGCTTTTGGTGTCTGTAATATGTATCGGAAAGAGAAGAA
A_33_P3247331	0.275254	0.0333	-2.40445	-3.89495	-1.92764	A_33_P3247331	AF003743	AGAAATTAAGCATACGGTCACGAGAGTGCAAAGTTCTGTGAAACGCTCCAGTGGTTACAC
A_33_P3383075	0.118565	0.00513	-3.41747	-2.1271	-1.92676	A_33_P3383075		TACTTTGGGAGTTAACAGTGCAAAGATGAACCTAGTGGGTAAGGAGAAGCTGTCTTCACG
A_23_P11644	0.061172	0.00139	-4.13634	-0.87066	-1.91459	A_23_P11644	NM_006945	TGTCCAGGTGGAGCTAAGAAAAGGAAGTCCTCAGCTGTGCCAGCTCCCAGAGCTTCGGAA
A_33_P3290354	0.01924	0.000145	-5.46923	1.30143	-1.91226	A_33_P3290354	NM_032532	TCACAGGGTGAAAGAGATGGCAAATGGAGTACGTCAGTCTTCCAAAGAACACCAGAATCT
A_32_P79591	0.069286	0.0018	-3.99138	-1.12075	-1.9066	A_32_P79591	NM_024733	TGAACTATGATGTCACTCATCATCCTTATTGCACTGCAGGTGCCCTTCTTCTGACAGAAG
A_24_P385190	0.310072	0.0444	-2.24578	-4.15861	-1.90064	A_24_P385190	NM_000342	CCAACTGCTAGACAGGTTTATCTTTGAAGACCAGATCCGGCCTCAGGACCGAGAGGAGCT
A_33_P3225195	0.255141	0.0273	-2.51421	-3.70916	-1.8968	A_33_P3225195		TATGCAACTACCACAGGGTCAGATAGATTCTCTTGGCACAATTGTTGCTTCCATGAAACA
A_23_P116523	0.101029	0.0038	-3.58044	-1.83941	-1.89512	A_23_P116523	AF116668	AAAGACCTCAAGCTCATTCTGCCCAGGATTAAATCCAAGAGCCTTCTTAGCCCAGTTTCT
A_23_P69179	0.243685	0.0248	-2.56657	-3.61972	-1.89426	A_23_P69179	NM_018192	CCAGGTTGCCTAGGAGTGGGGTCCACTGATGAAAAGAGGTGTTTTGTACTTACATAAGAA
A_33_P3315944	0.111031	0.00456	-3.48079	-2.01521	-1.89146	A_33_P3315944	NM_001004311	TCAAGAAACATCACCCAACATATCAGCTGTGCTTTCGGCTTGAAGAATGAAGAGGAAGGG
A_33_P3382887	0.140494	0.00741	-3.21801	-2.47993	-1.89085	A_33_P3382887		CTGCTGCTGCAAAAGTGGAAATGAAGCCAAAAATGAAAACAGGAGAGAATAAATCTTCAG
A_33_P3271156	0.010185	3.34e-05	-6.42261	2.68814	-1.87807	A_33_P3271156	NM_001204352	GGTATCTTTAATTTCAACAGTGGGTAAACTGGTTTCCCAGTATACAATTCATTGAAAGCA
A_23_P127781	0.073168	0.002	-3.93372	-1.22079	-1.87562	A_23_P127781	NM_006552	TGATCTTCACTGCAGAATGTAAAGGTTTCAACGTCTTGCTCTAATAAATCACTTGCCCTG
A_32_P341615	0.291339	0.038	-2.33249	-4.01531	-1.86868	A_32_P341615	NM_173521	AAAGAGATCTTACTAACAAGCATGGAATTGAGGATATCGGGGATATAAAATTCAGCTCCA
A_24_P223874	0.152269	0.00871	-3.1309	-2.63397	-1.86643	A_24_P223874	NM_005411	ATGTACACAGATGGGCAGTGGAATGACAGGAACTGCCTGTACTCCCGACTGACCATCTGT
A_33_P3396404	0.206183	0.0166	-2.78357	-3.24445	-1.8626	A_33_P3396404	NM_001025232	GTAAACGAGACTTTGACATTGTTAGCAGGCCCATCTGTTTGCTTTTCTTAAATAAAATGT
A_24_P200219	0.201092	0.0157	-2.8137	-3.19188	-1.8624	A_24_P200219	NM_006952	CTTAACAGTGGTTCAAATTTCCTTTCATACCTTGAAGTATGTGTTTAGTAGCCTCAATTC
A_23_P127352	0.181485	0.0123	-2.94344	-2.96449	-1.86207	A_23_P127352	NM_198923	GACTTTGAATAGCAGTGGGACCGTGGAGTCAGCCCTAAACTATTCCAGAGGGAGCACAGT
A_23_P126689	0.008878	2.19e-05	-6.71514	3.08472	-0.799788	A_23_P126689	NM_001014443	ACAAAGCCGGAAGTCCTGTATACCAGCTGTATGCCCTTTGCAACCACTCAGGCAGCGTCC
A_33_P3420976	0.309341	0.0441	-2.24982	-4.15198	-1.85032	A_33_P3420976	NM_001164442	TCTGTGTTTTAAATGCTTACTGGAGAGATGGGACAATAAAAATAAAGCGTGCACTTGAAA
A_33_P3378272	0.226228	0.0209	-2.65809	-3.46227	-1.84672	A_33_P3378272	AK126462	ACTTTTCTGGGGGACCTGTTCACGATGCCTTCTGTAGCATACTCCAAGAATCCGGCGCCC
A_33_P3269208	0.155849	0.0091	-3.10735	-2.67557	-1.84596	A_33_P3269208	NM_001001850	TGCAGAGTACTGTGTTGTTGGTGCTGTCCATGCTGTAGCTCAAAATAAAGAAGCTATTTT
A_33_P3812027	0.165853	0.0104	-3.03729	-2.79923	-1.84223	A_33_P3812027	BC032033	GAAGAGCTGCTAAAATAGATGAACTATATTTATAATGGCATGAACAAACGACACAAGGCA
A_33_P3250750	0.198704	0.0153	-2.82826	-3.16643	-1.83251	A_33_P3250750	CU677518	TTCGTTTACTGTTCTTCGTGAGCTTCACCACATCGTTCTGTTGTTGCTGCTGCTGTTTTG
A_33_P3305456	0.161668	0.00972	-3.07184	-2.73828	-1.82458	A_33_P3305456		TGTACAATGACCTCCTCAGGAAAGATAGAGAATGCTACACCCGCAACGGAATCTTACACA
A_33_P3310164	0.314743	0.0465	-2.22047	-4.20005	-1.81684	A_33_P3310164	NM_004080	CACCAATAACGAAATAGAAGTTTTAAACTATGTGCCTAATCAATGTGTTTCCCACCAAAG
A_23_P416751	0.047938	0.000869	-4.40192	-0.41849	-1.80662	A_23_P416751	NM_173530	ATGTGGCAAAATCTTTAGTTAGAATTCACACCTAGCACAACATTGGAGGACTCAGGAGAA
A_33_P3371381	0.199747	0.0155	-2.8211	-3.17894	-1.806	A_33_P3371381	XM_001128459	AAGACTCGTCATTTCAAAAGCAAAACTGACTCAAACTCCAAGAAATGTGTAGTTTCATAA
A_33_P3399480	0.153544	0.00884	-3.12258	-2.64866	-1.80024	A_33_P3399480	AB073651	GAGAAAAAACCAGATTATATAGAAAGGAAAAAGGGAAAAGGGATGTTTCCCCACCTTTTA
A_33_P3262431	0.215945	0.0189	-2.71368	-3.36602	-1.79593	A_33_P3262431	NM_032045	TGGCCCACGCACGAAGACTCAAGACCCTCAGGACTGGCCATATAATCTGCAAGGTCCAGT
A_33_P3415778	0.261005	0.0288	-2.48487	-3.75907	-1.78849	A_33_P3415778	AK126643	TCAGCCAGAACTTGGGAGGACTTGGTGCTTAATGCCCCATCTTTGGTTCGCCCTAGGTAA
A_33_P3422000	0.269286	0.0312	-2.43993	-3.83517	-1.78325	A_33_P3422000	NM_006593	AGAAGAACTGCGCCAAGGACATTAGCGGCTACTATGGCTTCTACTCGCACAGCTAGGCCG
A_24_P297526	0.20713	0.0171	-2.76847	-3.27076	-1.77398	A_24_P297526	AK057872	ACAATAGCCCACACTTCTAGGGTAAAGCATTTTAAATTTATTTTCTCAACAACCCAAGAG
A_23_P145841	0.181766	0.0124	-2.94121	-2.9684	-1.75414	A_23_P145841	NM_015464	TCAAACCCAGCAAGCTGTCTTAAGTATCAGGACCTTCTTTGGGAATAGTTTTTCCTTTTC
A_23_P396858	0.052387	0.00102	-4.31299	-0.56899	-1.748	A_23_P396858	NM_031866	ACTGACCTTAGGCATGGAGAAAATTACTTGTTAAACTCTAGTTCTTAAGTTGTTAGCCAA
A_33_P3377190	0.239061	0.0235	-2.59436	-3.57205	-1.74413	A_33_P3377190	AK127156	TTACCAGAAGAGATTCATCGCTTTCTCTTGGTCTGGGCAGCCCGGGCCTTTTGAGGGTGG
A_33_P3414789	0.073435	0.00201	-3.93039	-1.22658	-1.74096	A_33_P3414789	NM_024333	CAAACAAGTGCTGCACACTTTCAAGACCAGGTTCACACAGCCGCTGCTGCCTGCTTTCAC
A_33_P3353796	0.079922	0.00242	-3.82692	-1.40686	-1.73868	A_33_P3353796	BC045633	AAACCCTCGAAACCAGAAGGTTATTCTAGCAGGAGTACCAGTACAGGGATCTCAGGAATT
A_24_P605081	0.210642	0.0179	-2.74295	-3.31517	-1.73547	A_24_P605081	NR_024408	CGTAGCCAACAATAAAGTTGTTAGTTTTTAAAACATCTATGTGGTAAGTTGGTCTGGCAC
A_23_P416821	0.1923	0.0139	-2.87824	-3.07894	-1.72836	A_23_P416821	NM_152774	GGGGTAAAAAACTTTCCAGAAACATTCTAGTACAATAATTTCAAGAGGCTTTCCAGATTG
A_33_P3297080	0.155655	0.00907	-3.10926	-2.6722	-1.72752	A_33_P3297080	NM_001014342	GTCATGGCCTTCTGGATATAGGATCCAGAAAATTGTACTTCATAAAAATTGGCAATAAAC
A_33_P3251557	0.251886	0.0265	-2.53044	-3.6815	-1.72081	A_33_P3251557		AAATGATATTTTTTCAACTTTTATAAAGTTTGGGTGGGGAGGTGAAAGTGGGGAGAAGGG
A_33_P3262108	0.22146	0.02	-2.68188	-3.42113	-1.71803	A_33_P3262108		AATTGGGGCATGATCATGGGCCGCGATGTTGCGTGAAGCGCAAGGATGTCAGGAACTGTG
A_33_P3264163	0.098222	0.00355	-3.61793	-1.77339	-1.71619	A_33_P3264163	NM_001202522	TTTCCCAAGGAGGAGGAGTACTTGCAGGTGGATCTACAACGACTGCACCTGGTGGCTCTG
A_33_P3217594	0.043847	0.000691	-4.5337	-0.19734	-1.71233	A_33_P3217594	AK128250	AACAGAATAATTCGTACTGGGGAGAAACCTTAGAAATCCAATGAGCATGGGAAAAACTTT
A_33_P3333003	0.152633	0.00877	-3.12741	-2.64014	-1.7107	A_33_P3333003		GGAACAGGAACAGGTGGAGCCGCAGAATAGAAAGACAGACAGAACTGCAAGAGTTTCCAC
A_33_P3401394	0.118911	0.00515	-3.41483	-2.13177	-1.71057	A_33_P3401394		GCCTAGGTTTTCATTAATAAAATCTCTGGAGTGAAGCAGCTGCTGCTGAAATTTGGGGGC
A_33_P3380702	0.016935	0.000112	-5.6281	1.54259	-1.70913	A_33_P3380702	NM_001004738	AGAAATAAAGATGTGAAAGAAGCTCTCAGAAAAGTGATGGGCTCCAAAATTCACTCCTAG
A_33_P3259388	0.242262	0.0244	-2.57486	-3.60552	-1.70545	A_33_P3259388		ATCCTCAGGAAAAAAGGGCTAAGTGTCCGGTCTTTTGGAACTGAATCTCATGTGAGGCTA
A_33_P3359027	0.209074	0.0175	-2.75375	-3.29639	-1.70355	A_33_P3359027	NM_001144872	ATTCAGATTCAGAACACAGCAGCGGAGAAGACTCTGCTCCTGGGACGCAGCAGGATGGCT
A_33_P3311235	0.041721	0.000624	-4.59281	-0.09887	-1.69511	A_33_P3311235	XM_001128459	AATGAAAACTTCCAGAAACTCCATTGCAGCCCTTACTATTGAAGGAGCATGCTCTCCTGG
A_33_P3253931	0.252836	0.0266	-2.52661	-3.68802	-1.69288	A_33_P3253931	AB031230	GGGCTCCAGTTTTGGGGAATATGTGAACCACAAGCCAGGAAGAATGCTGGCTGGGCATGA
A_23_P24031	0.247248	0.0255	-2.55089	-3.64656	-1.68858	A_23_P24031	NM_005521	TCTTCGCCCTGCAGAATCTGCAGCCGTGGTCTGACGACTCGACCAAAATCACTAGCGTCA
A_33_P3228445	0.19056	0.0136	-2.88881	-3.0604	-1.68844	A_33_P3228445	NM_001680	AGACACTCTCCAAAAAGCAGAGACAGCAGGAAGAGGGGAGTGGAGGCAGCCCATTCACCT
A_33_P3355732	0.228189	0.0214	-2.64583	-3.48343	-1.68514	A_33_P3355732	AB096971	CTCTGTGGCTTCCAGGGTGAGAATCCTGTCCCTTTCGTGAGCACAGAAGGTTGGAAAACA
A_33_P3386099	0.271573	0.0321	-2.42523	-3.85997	-1.68205	A_33_P3386099	NM_001114123	TCATCTCCTGGACTTCACGGGATGGTGGTGAATTCAAGCTGGTGGATGCAGAGGAGGTGG
A_33_P3216568	0.076654	0.00217	-3.88874	-1.29904	-1.68157	A_33_P3216568	XM_003403450	ATCAAGGCCAGTGGGGAAGTGTTCCTGAACCAGATCTACACCCAGCTGCCCATCTCTGCA
A_32_P197621	0.197278	0.0148	-2.8455	-3.13627	-1.68142	A_32_P197621	NR_002830	ATCCTGACATAAAATGATAATTTTGTATATATTATACTGGTTTTTTATGTTGTCAGTAAC
A_33_P3322400	0.299277	0.0406	-2.29505	-4.07743	-1.68027	A_33_P3322400	XR_111602	TAACTGTAATGTCATACTGGGATGGGAAACAATGGCCATGAGGTCATTACTGGGACAACT
A_33_P3313801	0.069025	0.00179	-3.99411	-1.11602	-1.67849	A_33_P3313801	NM_080654	GTAAGGAGGGGAAAATGGATACACACATTGACATCTCTTTTGCAAAATATTTCTTCCTAT
A_33_P3228902	0.109175	0.00442	-3.49777	-1.98524	-1.67668	A_33_P3228902	AK125136	ATTGTCTGTTGGGGTTGGCTTTCTGTCAACTTAAACAGGAGCAAACTTGGTTACTTTTAA
A_33_P3266550	0.197924	0.0149	-2.84225	-3.14197	-1.67457	A_33_P3266550	NM_020469	GACACCATTACATACACAGACACACACAGAAAGACACAGACACAAAATCACACACACACC
A_33_P3363305	0.113835	0.00478	-3.45537	-2.06013	-1.67031	A_33_P3363305		TCTGCTGCTGCTCCTCAGGCTGTGAATCAACCTGCTCCCAGTCCAGCTGCTGCAAGCCCT
A_23_P253692	0.116561	0.00497	-3.43471	-2.09662	-1.66649	A_23_P253692	NM_001079858	ACCCCTTTTAGTTAAGTCTTTCACTAAGGTTCTCTTGCATATATTTCAAGTGAATGTTGG
A_23_P129332	0.310157	0.0446	-2.24325	-4.16276	-1.66286	A_23_P129332	NM_001076780	CTTTGTGCTGACAGTAGTTATTTCTGCCACCAATCGTGCAGGGGACACGCAGCAGACCCA
A_33_P3406405	0.141099	0.00749	-3.21253	-2.48964	-1.65932	A_33_P3406405		TACCTGAGGCCAGATGTCAATCCGGGGCCTGATGTCTACTCAGGTTCAGCTGTCCACCTA
A_23_P153183	0.088153	0.00292	-3.72453	-1.58607	-1.65002	A_23_P153183	NM_001168648	ACAGAAAACAGACTTGTAAAAAGCTTAGATCATCAAGTGTTTTGGATTGGGGGCCTCCCA
A_32_P72110	0.218547	0.0193	-2.70197	-3.38634	-1.64812	A_32_P72110	NM_006505	GTGTTGTATAAACTTATAGTAAGGTTAAGAAAACCGCCACTATCCTTATCAGAGACTTGG
A_33_P3212729	0.296196	0.0398	-2.30577	-4.05967	-1.64774	A_33_P3212729	NM_001164595	AGAAAATTTTGGACAACTGGATGACAATCCAAGAACTGATGACCCATGGGGCCAAGTCTC
A_33_P3733417	0.207161	0.0171	-2.76671	-3.27384	-1.64722	A_33_P3733417	NM_000795	TGGGGCCTAGACTCTGTAACATCACTATCCATGCACCAAACTAATAAAACTTTGACGAGT
A_24_P342484	0.163016	0.00999	-3.0568	-2.76483	-1.64557	A_24_P342484	NM_000567	TACTTCCTATGTATCCCTCAAAGCACCGTTAACGAAGCCTCTCAAAGCCTTCACTGTGTG
A_32_P491499	0.189474	0.0134	-2.89765	-3.0449	-1.64202	A_32_P491499	BC025775	AGGTCTCCAGTGGTGTCGGATTAGAATATGAGGAATCCGTCTGAGCTCATTCTCCACAGG
A_33_P3413168	0.013085	6.17e-05	-6.01379	2.11128	-1.64083	A_33_P3413168	BC007696	TTCTACCCCAAAGTTCAGAGGCCAGAGGTGGGAACTCAATGCCTTCAGAAGGTGCCCTGG
A_23_P150590	0.209943	0.0177	-2.74831	-3.30587	-1.6335	A_23_P150590	NM_080866	AAGCCTCTGTTTGACACCATCCAGGATGAGAAAAATGAGAGAAAAGACCCCAGAGAACCA
A_23_P212968	0.299761	0.0408	-2.29287	-4.08103	-1.6323	A_23_P212968	NM_001073	TGTTGTGGTGTTTTCTCTGGGGTCAGTGATAAGTAACATGACAGCAGAAAGGGCCAATGT
A_33_P3376965	0.198818	0.0153	-2.82659	-3.16936	-1.63199	A_33_P3376965	NM_024111	TTCTCCGGCCACAACCTTGAATACTTGCTGCGTCTGGCAGACTTCATGCAGCTCTGTGGG
A_23_P309396	0.187058	0.0131	-2.9094	-3.02428	-1.62454	A_23_P309396	NM_178857	ACTCAGAAAATGACCATGTACTTGGAGACACAAGGAGCCCTGATGCCAAGTCCACGGGGA
A_32_P211248	0.129647	0.00625	-3.31013	-2.31696	-1.62394	A_32_P211248	NR_036513	GTGCTGCTGCTTCTGAAAATCAGAAGAGTGAGGATGAAATAAAGTCTTCATAAAGGAAAA
A_24_P373844	0.023784	0.000229	-5.18881	0.86606	-1.62254	A_24_P373844	NM_024076	AAGCATTTTTACACTTCCTGGAATGAGTATATTATCAGCAATCTTTTGTCAAATGCCAGC
A_23_P126658	0.262424	0.0293	-2.47386	-3.77775	-1.62045	A_23_P126658	NM_001012276	CATCAGGGTGGATATATTTCAAGCTTTCTTCTGGTCATTTCGGAGCTGAAACCTAGGCCA
A_32_P133395	0.080738	0.00247	-3.81691	-1.42434	-1.61962	A_32_P133395	XR_110544	CTGGCTTGCTTACCTTGTTATCAAGTCCTGAATGGGGGAAGCAATATTCCTTCTCCACTA
A_33_P3248024	0.1734	0.0113	-2.9903	-2.88204	-1.61938	A_33_P3248024	AK311432	CCGCCACCTGGGCCGTGATTGGGCGCGACCTGGGCTCCTGGGTGCTCATTGGCGCCGTGA
A_23_P430842	0.181912	0.0124	-2.94055	-2.96957	-1.61512	A_23_P430842	NM_023002	GCATGTTTGTCGTCGTCCTACAAATGAGGAAACCGAGCCTATGGCGTGCCCTGGTCTGTT
A_33_P3271226	0.257374	0.0278	-2.50373	-3.72701	-1.613	A_33_P3271226	NM_001004747	CCAAGTTGAATCCCATCATCTATAGTTTGAGGAACAAAGAAGTAAAAAAGGCAGTGAAGA
A_33_P3348872	0.239216	0.0236	-2.59362	-3.57332	-1.61139	A_33_P3348872		TGATCACGGCCATTTATCTTGTGTTCAATCTATTTATAAAGCCGGGCTGAGCAGCCACTG
A_24_P833129	0.048026	0.000873	-4.39985	-0.42198	-1.60239	A_24_P833129	NM_001101426	TGTGTAGTTATGGATACAGAAGAAGATAACAAACATGTAGGTCATCTTCTTGAAGAAGTG
A_33_P3362737	0.09833	0.00359	-3.61072	-1.78607	-1.60161	A_33_P3362737	AK124695	GGTGAACCCAACAGGTCATCATTCCGCTCTGCTGAGGCTGCTGCTTTTGCCTCACAATGA
A_33_P3341648	0.145329	0.00792	-3.1823	-2.54311	-1.60151	A_33_P3341648	NM_001200049	TTGTTGCCGATTCAGGGAAGTCGAAGGGCAAAGACAAGGAGAGGAAAACGTCCACAGGAC
A_33_P3403237	0.09319	0.00323	-3.66849	-1.68446	-1.6015	A_33_P3403237	NM_001144995	AACCAGTTCAAGGGGCCTTTGTAGGGCCACTCTTCTGTGGACGTGGACTGGCCCTGCTGG
A_33_P3296582	0.221165	0.0199	-2.68428	-3.41698	-1.59951	A_33_P3296582	NM_024590	CACAACTCAAAGGACTGTGATATAATCCATTTATATCACAGCTCACAGTTTCTGAAAATG
A_24_P333532	0.292814	0.0386	-2.32345	-4.03033	-1.59858	A_24_P333532	NR_026765	TTAATCAGCGAAAGACAATAGAGCTTGCAGGCGGTGTCATGCTGAGTATCTGAACACACC
A_23_P252817	0.294379	0.0393	-2.31366	-4.0466	-1.59706	A_23_P252817	NM_001048	GGATGAAATGAGGCTTGAGCTGCAGAGATCTGCTAACTCAAACCCGGCTATGGCACCCCG
A_23_P38271	0.099272	0.00366	-3.60066	-1.8038	-1.59391	A_23_P38271	NM_017534	CGGGAGGTTCACACAAAAGTCATAAGTGAAGAGTGATCATGTCCTGATGCCATGGAATGA
A_23_P329924	0.077028	0.00223	-3.87337	-1.32581	-1.59253	A_23_P329924	NM_177551	ATTGTCAAGGTGTTGCCGCCGGTGTTGGGGCTGGAGTTTATCTTCGGGCTTCTGGGCAAT
A_33_P3327404	0.05938	0.00131	-4.16861	-0.81531	-1.58952	A_33_P3327404	NM_145259	TTTAAGTGCCCATAAGGCAGCATGAAAAGATAACTCTAAAGTTAAGCATGGGCAGGAGTT
A_23_P41395	0.077975	0.00228	-3.86104	-1.34731	-1.58517	A_23_P41395	NM_000730	TGGGAACTCTTCAAGGTCTCTTTTCATCCTTCATCTGATTCCAGAGCACTGCTCCAGTGG
A_33_P3252073	0.291339	0.038	-2.33184	-4.01639	-1.58516	A_33_P3252073	NM_001025233	TTTTCCTCAGAGAGCTGTAAGAATAAACTGAGCTAACCCATGTCAAGCACATAGAATAGG
A_23_P388220	0.198704	0.0153	-2.82806	-3.16677	-1.58287	A_23_P388220	NM_173848	AGATGGGATAGAGGAGGACTTCGATGAAGATGGGGGTCATGAGCTGTTTCTACAGATAAA
A_23_P360079	0.168885	0.0107	-3.01875	-2.83192	-1.58186	A_23_P360079	NM_207363	AATAGTGACAGTGACCTGGACTATGGAGATAATGGTTTTGGAGCTGGAAGGGGACAGTTA
A_23_P433798	0.311664	0.0452	-2.23615	-4.1744	-1.57936	A_23_P433798	NM_024825	CCACGTCCCAAACATTCTAGTTAGCTGGTAAAGCAATCAGAACAAGAAAATGATAAGAGT
A_33_P3216282	0.146521	0.00808	-3.17158	-2.56205	-1.57926	A_33_P3216282	NR_024478	TTGACCCTGGGGGATCTTTGGGTCAATAAAACATTCTATAGACCCTCAGTGGTCAGACTA
A_33_P3401402	0.176431	0.0117	-2.97018	-2.91746	-1.5791	A_33_P3401402	NM_001123065	TATACATAAATGGTTTCACTGACCCCTGGAAGGATGCTCAGGCCTGGATACTCATTGTGA
A_33_P3423984	0.15902	0.00942	-3.08852	-2.70883	-1.57909	A_33_P3423984	AK096458	GATGAAAATTCAGTATTACAACCTGGCTCATCTCATTTCCTCATGGCTTTCTTCATTTTT
A_23_P35484	0.038127	0.00053	-4.68822	0.05904	-1.57909	A_23_P35484	NM_006229	CACCAAGATCACTGTGCAAAAGGGAGAAGAGAAGACAGTGTACAACTTCTGTAGCGAAGA
A_33_P3795524	0.320126	0.0488	-2.1928	-4.24515	-1.5777	A_33_P3795524	XR_110000	CCCATCTTAGAGGAATGGTCTCTTCTTAATGTCTTTGTGTTCTAAATATTTGATCATGTC
A_33_P3422712	0.241245	0.024	-2.58426	-3.58938	-1.57551	A_33_P3422712		TTTCCGACAGGGATCAAACAGGTAATGGCCTCGCATCTTCGCTGTTGCTGCTGCTCTGGG
A_33_P3222391	0.214105	0.0186	-2.72261	-3.35052	-1.57536	A_33_P3222391	NM_182909	GTGGCAGAAAAATCCCGTAGGCAAACCATATTGGAGTTGGAGGAAGAAAAGAGAAAACAT
A_33_P3392882	0.141099	0.00748	-3.21275	-2.48925	-1.57499	A_33_P3392882	NM_207481	CAGCAGTACAGATGAGGGAAAAGAAAAGACCAAATTGCTATTAGAGAGATTGAAAGCTCT
A_33_P3267033	0.255707	0.0274	-2.51174	-3.71338	-1.57404	A_33_P3267033	XR_108782	GACTCTTTTTCTTTTCCAGTGACAGAGACCATGTCTCCAGAAGGCAGAAATAAATCTTGA
A_33_P3391390	0.213649	0.0185	-2.72512	-3.34617	-1.57375	A_33_P3391390		AACAGACCTGAATTTGCTAAACCCTCTAGAGCTCGACAGGACCTAAGCCTTGATATGGTT
A_33_P3283126	0.272044	0.0324	-2.42001	-3.86877	-1.57016	A_33_P3283126	AK129960	TTAGAAGAACAGATAAGGCAGACCAGTGAGGACTCGAGAGCCCTAAGGGAGCTCATGGAG
A_23_P395464	0.079286	0.00236	-3.8423	-1.38	-1.56987	A_23_P395464	NM_144690	AATCTGAAAGATAAACTCATATGCACTAAACATGCTATTCAAGTCTACCAAACATCCAGG
A_33_P3413104	0.24296	0.0245	-2.57134	-3.61154	-1.55912	A_33_P3413104		TTTCAAAACCAGCCAGAGGGCCCAAGGTCAACATGAGGGAGAAATCAACCTCCCCCGCCT
A_23_P63032	0.220237	0.0196	-2.69223	-3.4032	-1.55863	A_23_P63032	NM_007102	GAGGCTTCCAGCATCTTCAAGACCCTGAGGACCATCGCTAACGACGACTGTGAGCTGTGT
A_23_P152995	0.145661	0.00798	-3.17798	-2.55074	-1.55635	A_23_P152995	NM_001045	TGCTGGAATCTACTAGAACCTTCTAATCCATGTGCTGCTGTGGCATCAGGAAAGGAAGAT
A_23_P335495	0.310157	0.0446	-2.24339	-4.16253	-1.54236	A_23_P335495	NM_001001891	GGGGAGGTTTTGGGATGAGAGGAGGAAACGTGTATACCTGTAACATCTGGTGGCTCTTCC
A_33_P3241369	0.274719	0.0331	-2.4081	-3.8888	-1.54217	A_33_P3241369	NM_053049	AGACGCCTCTTCGGGAGAGGAGGAGGAGGGCAAAGAGAAAAAGACTTTCCCCATCTCTGG
A_33_P3216438	0.149644	0.00838	-3.15142	-2.59769	-1.53909	A_33_P3216438	NM_198546	GGAGCTGCTGCTGGGATTTGCTTTTGTGGCCTGGTGAGCTAATAAACACCAATAACTTCA
A_33_P3347397	0.072258	0.00195	-3.94626	-1.19901	-1.53753	A_33_P3347397	NM_001113490	TCTAAACGGCCAAATCAAGAGCTGCAGATTATCAGCAAAAATGCTTTTAATCATTTTCCC
A_33_P3377750	0.116928	0.00501	-3.43031	-2.1044	-1.53626	A_33_P3377750	NM_177417	GAAGAGAGCCATGTCACTCAACACACTGAACGTGGATGCTCCAAGGGCTCCTGGGACTCA
A_33_P3417086	0.022297	0.000201	-5.26836	0.99082	-1.53446	A_33_P3417086	NM_207330	GGGTGCTTTGTTCTTCCTTCTGCACCTCCTTCTTAAACTAGATAGCTAATTAGTTATTTT
A_33_P3223488	0.132974	0.00658	-3.28214	-2.36648	-1.52968	A_33_P3223488	NM_023037	TGGTATAAAAGGCAAAATGGCATTGAGGATGAATCACATGAATACAGACCAAGAACAAGC
A_24_P51322	0.161141	0.00965	-3.07565	-2.73155	-1.52847	A_24_P51322	NM_002016	AGCTGGACATGGGCACTCTGCAGACAGCTCCAGACAATCAGGCACTCGTCACACACAGAA
A_23_P157793	0.09833	0.00359	-3.61073	-1.78606	-1.52615	A_23_P157793	NM_001216	CAGTTGCTGTCTCGCTTGGAAGAAATCGCTGAGGAAGGCTCAGAGACTCAGGTCCCAGGA
A_33_P3855484	0.054428	0.00111	-4.26454	-0.65136	-1.52314	A_33_P3855484		TTGCATATCCACCAGCACGCGAGGACATAAAGAAGGCTGACCGCACGGTGGAACCAAGGT
A_33_P3409974	0.146584	0.00809	-3.17055	-2.56389	-1.5172	A_33_P3409974	NM_001128177	AGCTCATCTCCAAGTTTTTATTTGGCCAGGACATGAACCAAATAAACACCTTCCAAAGAA
A_33_P3215676	0.142019	0.00757	-3.20668	-2.49998	-1.5164	A_33_P3215676	NM_001146221	GGACAGAGAAAATCAGGATCCTTGCAAATTAAAAACCGTAACCATATGAAGGAGAACTCT
A_23_P36187	0.123287	0.00555	-3.37446	-2.20315	-1.51616	A_23_P36187	NM_138567	TCCAGCTCATGCTGAACCAGAGGAAGTGGAAGAAGAGAAAGACAGCCACCAAAAAGGGCA
A_23_P29046	0.105552	0.00418	-3.52807	-1.93176	-1.50956	A_23_P29046	NM_001757	AAATGATCTCTTATCAATTAGCACTCACTAATGTACTACTAATTGAGCAACCTACGCACT
A_33_P3888568	0.252348	0.0266	-2.52812	-3.68545	-1.50815	A_33_P3888568	BQ029156	TGGCTGTAAGATTACGGAGGTCCTGCAGCCAATTAAGCTGACTGAATTCCTTTCCTTATG
A_33_P3276828	0.253274	0.0267	-2.52476	-3.69118	-1.50815	A_33_P3276828		TAATGAACAAACTTTTAAGAGTTTTGTATTTAAATGGTTTCATGTTTTGCCTTGTCTGTT
A_33_P3307253	0.065078	0.00158	-4.06472	-0.99397	-1.50416	A_33_P3307253	NM_012093	GGGCATTGTTATTGATGGATTTCCAAGAGATGTTGCCCAGGCTCTATCTTTTGAGGACCA
A_33_P3276748	0.079847	0.0024	-3.83153	-1.3988	-1.50337	A_33_P3276748	NR_024491	ATTGTGGATTAAAAGCAAAAAGATTTTCGTGGAGGCGCCACCAAAGCCTGAAGTGTACCC
A_33_P3264394	0.222763	0.0202	-2.67708	-3.42944	-1.50335	A_33_P3264394	AK127311	AATGTTCCTCGTTGACAAATGGTCTTGCAGAAGGCAGGATGGCTCCTGCAGCCCCCACTC
A_24_P57528	0.120616	0.00532	-3.39748	-2.16245	-1.49879	A_24_P57528	NM_139177	GATGATCAAAATTGAAGACACATTCAGAGGTTTGATTGGTTGAGATTAACTGGTGTGGTG
A_23_P37914	0.099651	0.00369	-3.59611	-1.8118	-1.4961	A_23_P37914	NM_052944	GAGCTGCGCCATCTTTATCTGGGGCTATTTTGCTTAGTGTGGGGTGAACCCAGGGGTCCA
A_23_P386356	0.058086	0.00124	-4.19954	-0.76233	-1.4957	A_23_P386356	NM_138424	CCCAGCGGAACCTGTACGGGATGCTACAGGAGTTCATGCTAGAGAATGAGAGGCTCAGGA
A_33_P3892710	0.195698	0.0145	-2.85761	-3.11508	-1.49546	A_33_P3892710	AL706006	GCCTCCGCTAGTATTAACACATCAATTTGTATAAATAAGTATCTGACACGTCCTATATAC
A_33_P3356811	0.113879	0.00479	-3.45478	-2.06117	-1.49545	A_33_P3356811	NM_178353	GAGGCTGCTGCTGAAGTGGACCTTGACTTCCTCTTCCTTCTGATTCTGCCTGAATAGCTG
A_33_P3365732	0.195698	0.0145	-2.85763	-3.11505	-1.49525	A_33_P3365732	NM_033396	ATCGGAGTTGGGGAGAAGGACTGGACTTCTGATGTTAATGTGAAGAGCAAAGATTTGGCT
A_33_P3416331	0.270098	0.0315	-2.43583	-3.84209	-1.49253	A_33_P3416331	NM_001010893	CATGTGTTCTGGATGTGAAATGTTACTGATCATTCTAGTTTACAAGGCTAAGAAAAGATG
A_33_P3297630	0.098222	0.00355	-3.61755	-1.77405	-1.492	A_33_P3297630	NR_036575	AACACGAGTTATGGACTCGTGTGAAAACATTAACTGAGCACCTACTATGTGCTGGGCTCT
A_33_P3384462	0.071628	0.00191	-3.96001	-1.17514	-1.48867	A_33_P3384462	NM_024817	TTCTCCTGCAAATAGCGCCCTCTAAAAAGAAGAGTCAGACAATAAACTGGTTGAAATATC
A_23_P169494	0.08823	0.00293	-3.72237	-1.58986	-1.48637	A_23_P169494	NM_000607	TTGCTTTTGACGTGAACGATGAGAAGAACTGGGGGCTGTCTGTCTATGCTGACAAGCCAG
A_33_P3354429	0.310072	0.0445	-2.24477	-4.16027	-1.4855	A_33_P3354429	NM_001039111	GTGATAATTTCTATCTACCTCATAAATCTTTACATTTCCTTCTGCAACAGGCCCTCTTCC
A_33_P3273604	0.064124	0.00153	-4.08101	-0.96588	-1.4844	A_33_P3273604		TCTTGGTCTGACCTCTGAAAATGTGGAGATCTGAAAATATACAGCAGGTCTTGCACAGTT
A_32_P55293	0.199236	0.0154	-2.82458	-3.17286	-1.48384	A_32_P55293	NM_183058	GAACTATTGGCAAGGCTGGAAGAAACACTGTGAGGGGAGAGACCTGTCCGACTGGAAAAA
A_23_P139146	0.266695	0.0306	-2.45067	-3.81702	-1.48383	A_23_P139146	NM_031457	GTCTAGGAAACCATGCTGTTTCTCTATCAAGAAGAAGACAGAGATTTTAAACAGATGTTA
A_33_P3277328	0.136514	0.00702	-3.24725	-2.42821	-1.48308	A_33_P3277328	NR_037167	TTTGCTGGAGGAAACATTGCTTCTGAACCAGCCAACCTTCTGCTCCTGAAGAATATCTCT
A_23_P353125	0.172846	0.0112	-2.99397	-2.87558	-1.48198	A_23_P353125	NM_152597	CAATAGCAGATGAGCAGGAGACTAAAGATGCAGCAGAAGAATGTAAAGAACCCTAATCAA
A_33_P3246017	0.065774	0.00161	-4.05554	-1.00981	-1.48191	A_33_P3246017	AK091252	CTGGCAAGGAAGACATATATATGAGATGGGTTATCCTTTACACCTACGTCAGCTAAAACC
A_33_P3280471	0.220964	0.0198	-2.68656	-3.41302	-1.47935	A_33_P3280471	NM_001982	ATGGAAGTAGATAAAAATGGGCTCAAGATGTGTGAGCCTTGTGGGGGACTATGTCCCAAA
A_33_P3405204	0.097058	0.00347	-3.62948	-1.75306	-1.47934	A_33_P3405204	NR_038997	CCAGCAGGAAACAGCAAATGCAGAGGCCCAAAGTGACCAGGACACCGTCCTTGTGCACAT
A_33_P3351150	0.20841	0.0174	-2.75755	-3.28978	-1.47545	A_33_P3351150	NM_022068	ATCGCATCAAGGCCAGGCAACAGAAATATAAAAAGGGTAAGGAGAGGATGCTGAGCTTGA
A_33_P3381707	0.02445	0.000239	-5.16079	0.82189	-1.47407	A_33_P3381707	NM_001101426	TTATGTTTTATGTATATGTATTTTATATGTATATATATCTGCACATCCTTCACTATTTTC
A_33_P3240972	0.198374	0.015	-2.8392	-3.1473	-1.47067	A_33_P3240972	XM_003119593	ATGGGGGAGCAGAAGGAGCAGATGCGGAAGCAGGAGGAGCACATGGGGGAGCAGAAGGAG
A_33_P3303016	0.17306	0.0113	-2.99185	-2.87932	-1.46998	A_33_P3303016	AK127527	TGAAAATCACCAAAGGTCTTCCTTGTTGGGGAGGAGTGAATGGCAGCACCGGAAGCCAAG
A_33_P3260964	0.215649	0.0188	-2.71533	-3.36315	-1.46907	A_33_P3260964	NR_024441	TTCATCCTGATTCCATGCCAAGGCTTATAGTAGGTGCTCAATAAATGCTTGCTGAATGAT
A_33_P3354344	0.079064	0.00234	-3.84702	-1.37177	-1.46612	A_33_P3354344	NR_024593	TATTTCAGCCTCTTGGTCTCCTTGAGGAGTAGGGACAGGGAGCCCTCTAGGGATGGGCAA
A_23_P408285	0.003208	1.57e-06	-8.72278	5.46663	-1.46602	A_23_P408285	NM_153026	CAGCCACCTTTGTAAAGCACTAGTGTTTGTCATTTATGTAAGTCAGGTCGGCTCAGGTCT
A_33_P3239614	0.239554	0.0236	-2.59259	-3.57509	-1.4635	A_33_P3239614	NM_203395	GAAAAAAGTCCACTACTACAATGAGATCAGTGTTTCCATCGCTTGTGGCATCCTGCTAGC
A_23_P21485	0.024782	0.000247	-5.14184	0.79194	-1.45948	A_23_P21485	NM_017933	TGCTCCTTCCTAAAAGTCTGTTTTCAATCCTGGTAATATTAGGGGCACTGCGGCACCTAA
A_24_P244706	0.227958	0.0213	-2.64769	-3.48023	-1.45883	A_24_P244706	NM_001049	GCTTCAACAACTTTGTGCTTTCCTGAAAGCAGTAACCAAGAGTTAAGATATCCCTAATGT
A_23_P146456	0.017789	0.000124	-5.56617	1.44907	-1.4564	A_23_P146456	NM_001333	GAAGGACTTAAGGACAGCATGTCTGGGGAAATTTTATCTTGAAACTGACCAAACGCTTAT
A_32_P141682	0.12307	0.00552	-3.37693	-2.19879	-1.45559	A_32_P141682	NM_001145127	AGGTGAGGGCTTCAAAGGGTACAGTACCAAATCTTCCAAACTCAGCACTTGTGCCCTGGG
A_23_P253221	0.212854	0.0184	-2.72837	-3.34051	-1.45441	A_23_P253221	NM_032995	TTGCACTATTCCTTCTCCAAGCCAGAAACCACATTTAATTTCATAAATAAATTTATGAAA
A_32_P49309	0.096759	0.00345	-3.63267	-1.74745	-1.45349	A_32_P49309	NM_031939	ACAAATGAGGGTCACCAATTTCATTCCTTATAACCAATGTACAGGTTACTTTTATGCTTG
A_33_P3391826	0.178939	0.012	-2.95666	-2.94124	-1.45174	A_33_P3391826	NM_021081	GGGATGAAGATTCCTCCTGTGACCCGGGCTACCTGTAGCCAAAATGCAACTGGATCCAGT
A_33_P3222018	0.310072	0.0445	-2.24493	-4.16001	-1.45073	A_33_P3222018	NM_007276	GCTCTCAGAAAGCTGGCAAACAAAAAGATGGTAAAAAAGAAAATCTTTATCTGACAGTGA
A_32_P92789	0.200037	0.0155	-2.81864	-3.18324	-1.45041	A_32_P92789	NR_038384	TAAAACAACCCTCTAACAACAGAAGACCCTCATGAGAACACCAGGCAGCAGAAGCTTCTT
A_33_P3349025	0.073711	0.00203	-3.92401	-1.23766	-1.44512	A_33_P3349025		TGACCAAATACTTCAAAAAGGAGAACCAAGCAGCTCTCCATTTTCGAAAGCCTTCTGTAA
A_33_P3342752	0.219215	0.0194	-2.69779	-3.39357	-1.44504	A_33_P3342752		TATGGGATCCACAGATATCCGGCTTTAAAATCCATAAACTTGAGCCCTAAAACAAACAAA
A_24_P226069	0.061172	0.00139	-4.135	-0.87297	-1.44429	A_24_P226069	NM_031950	CCACAGTGAAACTCACAGAAGCAACACAGCTGGGAAAGGACTCGATGGAAGAGCTGGGAA
A_33_P3402943	0.311837	0.0453	-2.23407	-4.17781	-1.44134	A_33_P3402943	AK128705	ATCTCACCCCCATCACAGTTGGGCCAGTGAGGGGAAGGTAGGGAGAGGGTAAACAATCCT
A_33_P3305325	0.012014	5.27e-05	-6.11797	2.26082	-1.4405	A_33_P3305325		TGAAGAGAAACTGACTGGGCTTTTGGGGTCGGGGAAGAGGGAACCCCACAGACATGGATC
A_33_P3417464	0.24747	0.0256	-2.54901	-3.64978	-1.44012	A_33_P3417464		AAACTGAAGAGGCCACACATGTGGATGACAACAGGACGCTCTTGGCCACGTCCTCCTGCA
A_33_P3320599	0.232137	0.0221	-2.62857	-3.5132	-1.43912	A_33_P3320599		CCTACATGATGATGACAAAGGTGAAGAAATGTTATAGACTACAGATGGAGAAAGCACGAA
A_24_P331560	0.10793	0.00434	-3.50756	-1.96795	-1.4341	A_24_P331560	NM_000351	AGAAGGGCATGGTATTGGGACTAGGATCGGCTCTCATTCGATCGAGCTATTCTCTTAAAA
A_23_P29394	0.145663	0.00799	-3.17768	-2.55127	-1.4337	A_23_P29394	NM_032279	TCTGATAAAGGCAGAGAAGGAAGTTACCATTTTGCCCTAACTGGAAAATCCTTTCATGTT
A_33_P3336273	0.255141	0.0272	-2.51501	-3.7078	-1.43313	A_33_P3336273	NM_014903	AGTTTACAATGCAGACCATTTTTTGTCCCTTCCTTTTGTTTCCTCTGAGGGGCTGTTCGC
A_23_P45304	0.200255	0.0156	-2.81744	-3.18535	-1.43304	A_23_P45304	NM_021083	GCTTTCGTTGACTGCTTCTCTGCAGTCGTTGATGCTAATAAATATTGTCCTGTTTCTTCA
A_32_P135517	0.183188	0.0126	-2.93192	-2.98473	-1.43273	A_32_P135517	XR_109318	TGCTGGCCCCAAATGTTTGCATCATAAACCCATTGCCTAATTTTACAGTTGAGAAAATAA
A_32_P527371	0.208353	0.0173	-2.75968	-3.28608	-1.43201	A_32_P527371	NM_001039948	TGGCTCTGGTGGAAGTCTACCGTGACATCATTTTGGAGAACAACATGGATTTCACAGACA
A_33_P3307735	0.073711	0.00204	-3.92299	-1.23945	-1.43148	A_33_P3307735	NM_002547	ATACTACTTCTAAGGTAGCTGCAGATAAGTGGCCTTGACACATTACAAGCCTGGAAAAAA
A_23_P348121	0.264254	0.0299	-2.46342	-3.79544	-1.42766	A_23_P348121	NM_005253	TGGGACTGGAAGTGACCTGTACAAGTGATGCAGAAAGGAGGGTTTCAAAGAAAAAGGATT
A_33_P3240976	0.310072	0.0444	-2.24559	-4.15893	-1.42337	A_33_P3240976	AK027209	AATCTTTTACCTTTTCCGTTCTGGGCAGCAGCTGTAGGGAATGTTATCAGTGTTGGGACT
A_23_P157136	0.300244	0.0409	-2.2907	-4.08463	-1.4201	A_23_P157136	NM_033128	TGGTATTTGTAAAAAGCAAACAAACATTACAAGGCAGTTATCTCATTGCTGTTTTGGGAG
A_23_P65189	0.198607	0.015	-2.83736	-3.15052	-1.41977	A_23_P65189	NM_000209	AGAAATAATTGAAAGGAAATGTTTGAGTTTTCAAAGATCCCGTGAAATTGATGCCAGTGG
A_32_P117464	0.211274	0.0181	-2.73764	-3.32442	-1.41972	A_32_P117464	NM_178496	AGCTTTATACATGTTGACCCCATCTAAAGCTGGGGAAAATATACACTTGATGAAGTAGGT
A_23_P94186	0.320886	0.0492	-2.1887	-4.25182	-1.41959	A_23_P94186	NM_205545	GGGAGATAGTGTACCCCTTCCAGGGGGACTCCACGGTGACCAAGTCCTGTGCCAGCAAGT
A_33_P3216570	0.200044	0.0156	-2.81836	-3.18373	-1.4166	A_33_P3216570	AJ298317	AGAAATCCAGGACAACCACTTTGGTGACAACCAGCACAACCTCCACTCCACAGACCAGTA
A_24_P231010	0.065174	0.00159	-4.06255	-0.9977	-1.41562	A_24_P231010	NM_018995	GACAGGAAGTGATTGCAGTTGTGGAAGAAAATAAAGTGTCCAATGGACTGAAAGCAATCA
A_33_P3238941	0.12011	0.00525	-3.40468	-2.14972	-1.41257	A_33_P3238941	NM_147195	GCACCAAGCTCTTTACGGAGAAACAGCGGATGAAATATTTTCTCAGCACTCTTCCTACAA
A_33_P3423027	0.019463	0.000148	-5.45721	1.28304	-0.734113	A_33_P3423027	NM_006177	CAGTGAATGGGAGGTGGAGGAGGGTTGCAGCTCCCACCTCAGTTTAGTTTTTAATTCAGG
A_32_P129862	0.251334	0.0263	-2.53374	-3.67586	-1.41222	A_32_P129862	NM_138317	ATGAGAGGTGTCTCTGATTTTACTGAAAGTTATTATCATTTTCACAGGTGCCTGAGATTT
A_33_P3361412	0.151271	0.00859	-3.13805	-2.62134	-1.4106	A_33_P3361412	NM_018420	CCTGGAGGACCCTAGCCATTCTGGTTAACCTGCAGGGAACGGTGGTCTTTCTCTTATCTT
A_23_P18223	0.107354	0.00431	-3.51102	-1.96184	-1.41019	A_23_P18223	NM_002215	ACTCATCGATGGTGCCTACACTGATTATATCGTCCCCGACATCTTCTGAGCCCTCTGGCC
A_33_P3274179	0.204711	0.0162	-2.79512	-3.2243	-1.40819	A_33_P3274179	AK126787	GAGCTAGCGTGAGAAAGCTGTTGATGAGAACTGCTGCTGAATAAAATCATCTTTCACCTG
A_23_P142345	0.241435	0.0241	-2.58177	-3.59366	-1.4079	A_23_P142345	NM_002777	ATGGCATCATCCAAGGAATAGACTCCTTCGTGATCTGGGGATGTGCCACCCGCCTTTTCC
A_33_P3319834	0.241047	0.0239	-2.5855	-3.58726	-1.40713	A_33_P3319834	NM_001005522	TTGTGCTGACACTTCAGTCTTCGAAAACGCCATGTACATCTGCTGTGTGTTAATGCTCCT
A_23_P318860	0.163835	0.0101	-3.05229	-2.77277	-1.40617	A_23_P318860	NM_005161	CCAACATGGGCAAGGGTGGAGAACAGATGCACGAGAAATCCATCCCCTACAGCCAGGAGA
A_33_P3306267	0.291187	0.0379	-2.33354	-4.01355	-1.40579	A_33_P3306267	NM_000280	TGTATGATAAACTAAGGATGTTGAACGGGCAGACCGGAAGCTGGGGCACCCGCCCTGGTT
A_33_P3368506	0.136505	0.00701	-3.2479	-2.42706	-1.40574	A_33_P3368506	NM_001080442	CTCAGCGAGATCGTCAGCATCATCGGAGGCATCAGTTCCTTCTTCATCTTCATCTTCCCA
A_23_P131139	0.083126	0.00265	-3.77711	-1.49395	-1.4052	A_23_P131139	NM_052952	CTAATTACAATGCCCTGCTGCTGCTCATCTCCCTTTATTCGTTTGTACTCATACTCAAAA
A_33_P3252316	0.103094	0.00397	-3.55643	-1.88173	-1.40275	A_33_P3252316		ATAACTGAAACTGCAGAAGAGAAAACTGTGAATAAAAGGGAACAACTGTACCCTTACAAC
A_33_P3418571	0.062141	0.00144	-4.11617	-0.90535	-1.40133	A_33_P3418571		TTCAGGGTTTCTGGGAGGGTCACCCTGCTTTGCAGTGGGGGGACATCTTGTGAAGGAAAG
A_23_P158096	0.102856	0.00395	-3.55977	-1.87585	-1.4012	A_23_P158096	AK021957	GACAAAGTTTGGGGAATTTTTGAATTTTCCTAGCATCGCCCTTGTGCTCATCAGGTAATC
A_23_P370494	0.179629	0.0121	-2.95342	-2.94695	-1.401	A_23_P370494	NM_032101	TTTTAAGATTCTAGATAACTTCTTCATAGAGTTCGCAAAATATAGGTCAAATTTATGGTT
A_23_P377339	0.306774	0.0432	-2.26135	-4.13302	-1.39676	A_23_P377339	NM_144645	ATTGCATTGCTTGCAAAGACCTGGTACACAAACCTAGCCAATATCAAGTTGCCTTTCTTG
A_33_P3358731	0.241245	0.024	-2.58378	-3.59021	-1.39644	A_33_P3358731	NM_006200	TATTCACCAACCAATGAATTTCCGAAAGTGGAACGGTTCCGCTATAGCCGAGTTGAAGAC
A_23_P328022	0.073168	0.002	-3.93335	-1.22143	-1.39567	A_23_P328022	NM_152351	CCAGCAAAGCGGGAGCCCTGAAAAATTAGGGGGGAAATGGGAGAAAATAATGTGACATTT
A_33_P3324687	0.126367	0.00589	-3.34181	-2.26091	-1.3948	A_33_P3324687		GTAGTGTCTCCCACGACAAACAAAGACAATGAAGCTCCTTAGAAGTCCCTTGAGAAACCA
A_23_P69738	0.206178	0.0165	-2.78602	-3.24019	-1.39281	A_23_P69738	NM_023940	TGCCTAAGGGTGGCTGAAATACTAAAACACTATCTTACAGCAAGTGAACAGGGGCTACCT
A_24_P391868	0.20713	0.017	-2.76894	-3.26994	-1.39273	A_24_P391868	NM_006650	CACACAACACACAAGGGAGAGAACCCCCAGATGAGAAAATAGGAAGGAGCAATCATTTGT
A_33_P3319401	0.20713	0.0171	-2.76698	-3.27336	-1.39162	A_33_P3319401	AK074589	TTTTACAAAAATACCATTGCCAAGTTTTTGCAATTAAGTGACATGGAAATGTTATGTTGA
A_23_P130435	0.137226	0.00709	-3.24229	-2.43699	-1.391	A_23_P130435	NM_030657	TAGAGGCCTGAAATCCTGGTTCCTAGGGGAATGAGGGGGCTCAGTTCTGGACTGTGGGTT
A_33_P3282023	0.129565	0.00624	-3.31113	-2.31518	-1.38939	A_33_P3282023		TGCTGCTTCCATTTGGGGTATAGTGAACACACACCAAGTAAAAACAGAAATATCCTTAAA
A_33_P3361891	0.271536	0.0321	-2.4256	-3.85935	-1.38586	A_33_P3361891	NM_001042575	CAAACTTTGTTCCCTGGATTCATAAATATGTCCCTTCTCTTTTGTAATTGTACCAGTTGT
A_33_P3266429	0.306668	0.0431	-2.26201	-4.13195	-1.38548	A_33_P3266429	NM_001010971	TGTCGTCAATTATTTCCGAACCGTGGGATTTGAGGAGCAAGCTAGTGCTTTTCAGGAACA
A_24_P334529	0.169595	0.0109	-3.01179	-2.84419	-1.38475	A_24_P334529	NM_032011	ATCAGCCAGGAGAGCTGTGAGAAAAGCGAGCCTCTTCTGATAACTCAGGATTTACTTGAA
A_23_P80817	0.045152	0.000748	-4.48848	-0.27297	-1.38258	A_23_P80817	NM_013259	ATCTCAGAGTCAAAGATGGCTTTTAAGCAGATGGAGCAAATCTCCCAGTTCCTAAAAGCT
A_33_P3320499	0.208353	0.0173	-2.75987	-3.28574	-1.38177	A_33_P3320499	NM_030665	AGCCTGAAATCCGCCTCAAGTACATTTCCTCTTGCAAGCGGCTGAGGTCAGACAGCCGGA
A_33_P3414949	0.050555	0.00097	-4.33926	-0.52442	-1.38051	A_33_P3414949	BC009836	AGCCTCCTGAGCCCTGCCAGGGGGACCTCAGGAGGGATCCAATGTTCCATGAAGAAGTAG
A_23_P130281	0.105303	0.00417	-3.53016	-1.92806	-1.37845	A_23_P130281	NM_012352	CCAATTTCTACTGTGACATTATGCCTTTGCTGAAGTTGTCCTGTTCTGACGTCCACTTTA
A_32_P538928	0.28443	0.0358	-2.36544	-3.96034	-1.37626	A_32_P538928	NM_177986	CTCGGACCTAATTACTTTGTTAATGAATCTTCAGGATTGACTCCCTCAGAAGTTGAATTC
A_33_P3348328	0.106967	0.00429	-3.51362	-1.95725	-1.37619	A_33_P3348328		AACAAATGCAATGTGACTTATATTTTTCTTTGTCGCAACTACCACGACCTGGCCATCCCC
A_23_P214300	0.162228	0.00986	-3.06402	-2.75208	-1.37546	A_23_P214300	NM_000846	CGGTGGCTCCTGGCTGCAGCTGGAGTAGAGTTTGAAGAGAAATTTATAAAATCTGCAGAA
A_23_P77731	0.149781	0.00843	-3.1487	-2.60251	-1.37286	A_23_P77731	NM_001888	GTCCAGTCCCCAGTGAACTCTCCTTTTGTGCTTATCATGTTTTACCTTAAATGCTGAGAT
A_33_P3242251	0.083801	0.00269	-3.77014	-1.50615	-1.37254	A_33_P3242251	XM_002343033	TCTTCTGCCTCTCAGCCAGAGGAAATGCAGGAGCAAGGTGCCTGTAGCAACAAGGGCACT
A_23_P69537	0.182538	0.0125	-2.93636	-2.97692	-1.3674	A_23_P69537	NM_006681	AAATCCTTGCTAAATGTACTCTGTTGAAAATCCCTGTGTTGTCAATGTTCTCAGTTGTAA
A_33_P3343360	0.104482	0.00406	-3.54456	-1.90267	-1.36708	A_33_P3343360	NM_207491	GTATTGAAGAGACTGTTGAATATGAACGCAGTGTATTAAATGCCCGATATAGGAACAAAA
A_32_P163089	0.021132	0.000184	-5.3216	1.07377	-0.939101	A_32_P163089	NM_001145199	TATGGTGTCCAGTCAAACAAAGACGGTTCGGAAAAATTAGAAGAAAATAACATCATGACT
A_23_P89727	0.021165	0.000185	-5.31859	1.06909	-0.869981	A_23_P89727	NM_048368	GATCCTGGTCCGTGTACACACTGACTACTATGCCAAGTATGACCGCTACCTCAACAAGGA
A_23_P20068	0.242262	0.0243	-2.57712	-3.60164	-1.36707	A_23_P20068	NM_000840	TTGGGCTGTTTGTTTGCACCCAAGGTTCACATCATCCTGTTTCAACCCCAGAAGAATGTT
A_33_P3383292	0.109407	0.00444	-3.49545	-1.98933	-1.36421	A_33_P3383292	NR_033940	TCCTCTCTGAGGCCCACAAAAGACCCGTGCTCAGCCAGAAGCAGATAATTGGGTGACCAG
A_24_P917886	0.159705	0.0095	-3.08434	-2.71621	-1.36001	A_24_P917886	XM_003403637	CCTCTGCTTCTACAACTAGCACAACCTCTGGTCCTGGAACTACTCCCAGCCCTGTTCCTA
A_33_P3397288	0.206183	0.0166	-2.78338	-3.24479	-1.35878	A_33_P3397288	NM_000114	AACAAAGCAAGCAGGCTTTAGACCTCCACCATCCAAAGCTCATGCCCGGCAGTGGACTCG
A_33_P3229272	0.19622	0.0146	-2.85357	-3.12215	-1.35861	A_33_P3229272	NM_014567	ATGAACCACCTGAATGTGCTGGCCAAAGCCCTCTATGTCAATGTGGCCGAGTCCCCGGAT
A_23_P334727	0.129446	0.00622	-3.31248	-2.31279	-1.35744	A_23_P334727	NM_138573	AAGTCGTTTTGCCTGAATGGGGGGCTTTGTTATGTGATACCTACTATTCCCAGCCCATTT
A_33_P3328184	0.182821	0.0125	-2.93417	-2.98079	-1.35599	A_33_P3328184		TCCACCTGACTGCATTGCTTCATGGCACTGTGCTTTTGGACATTTGATATCCTTCAGCTA
A_32_P345659	0.310211	0.0446	-2.24293	-4.16329	-1.35067	A_32_P345659	NM_194293	ATGAGGAGGTGGACCAGTTTGGGAACACAGTCCTCATGTCTTCCACCACAGTCACCGAGC
A_23_P12241	0.04624	0.000772	-4.46973	-0.30441	-1.35064	A_23_P12241	NM_018298	TGTGGCTTGGAGTCATCCGATACCTCGGTTTCTTTGCAAAGTACAACCTCCTCATTTTGA
A_33_P3352011	0.125849	0.00583	-3.34737	-2.25107	-1.34922	A_33_P3352011		TGTGATGGGGGTACTAACAGCCAGGGGCGGAAGAGGGGATAGCTCTCAGTCCCCACCTTC
A_33_P3350179	0.261005	0.0287	-2.48656	-3.75619	-1.34251	A_33_P3350179	N95477	TTCGTTCTTCATTCAGCGTTTTTTAGTCAATCAAAAAGAACGTGGCAGGTGGAGGGCAGC
A_23_P51587	0.018695	0.000138	-5.49952	1.34773	-1.34132	A_23_P51587	NM_002924	CTGGACGATACACATTTGAAGATGCTCAGGAGCACATTTACAAACTGATGAAAAGTGATT
A_33_P3239569	0.251334	0.0263	-2.53371	-3.67592	-1.33961	A_33_P3239569	BC027976	TGTGTGATGGTGCCTGAGTAGATCTGCTGGCAGAGTAGTTTGAGCCAGCTGGACTGGGCT
A_33_P3406843	0.165253	0.0103	-3.04102	-2.79266	-1.33632	A_33_P3406843	NR_033906	GGAGGAGACAAGAAAAAGATCAAGATCATCAGTATCTAAAAAGAACGGTCAACAAGGCCT
A_23_P125082	0.018421	0.000133	-5.52118	1.38074	-1.33431	A_23_P125082	NM_002199	GCCTTGACAATAGAACATTGATTGCTGTGTCCAACTCCAGTACCTGGAGCTTCTCTTTAA
A_24_P143653	0.108969	0.00441	-3.49919	-1.98272	-1.32981	A_24_P143653		TAGGGTCAGGCGACATAGATGGCCCAAAAAATTCTCCTAACAACGTAAATAGTATTAGCA
A_33_P3277611	0.115818	0.0049	-3.44146	-2.08469	-1.32923	A_33_P3277611	NM_001080483	TGTGCCCTGGCTATGTCCTTTGTTCTGCTGCTGCCCAAGGTCAACAAGAAGGCTGGATCC
A_23_P202978	0.022721	0.000211	5.23812	0.94351	0.884575	A_23_P202978	NM_033292	CTGTTCCTGTGATGTGGAGGAAATTTTCCGCAAGGTTCGATTTTCATTTGAGCAGCCAGA
A_33_P3357818	0.284139	0.0357	-2.36673	-3.95818	-1.32908	A_33_P3357818	NM_000864	CTGAAAACTCATTAGAGATGTTGAGTCTTATCAAATAAAAAGCATGAGACATCATGGCCA
A_33_P3249893	0.049458	0.000934	-4.36071	-0.4881	-1.32676	A_33_P3249893	XR_108343	TGTCAACGTGACGTCTTCTGGGGCTCCTGGCATCCCTAGGAGTGGAAGCCGCTGATGAAG
A_33_P3300610	0.321413	0.0494	-2.18688	-4.25477	-1.32612	A_33_P3300610	NM_001005193	GGGAGGATACCTTCTCTTCTGTGGTGTGCCATTTGCTTTGGATTCAGGTTTCTAGAGTAA
A_23_P43846	0.317513	0.0476	-2.20708	-4.22192	-1.32566	A_23_P43846	NM_001040442	CAAGGAAAGCAACATACAGACAATGGGGGGCAAGACGTTCAAGGCCACTGTGCAGATGGA
A_33_P3332215	0.208763	0.0175	-2.75607	-3.29236	-1.3242	A_33_P3332215	NM_001044392	AGAAAAGGAGACTTCGGCTACCCAGAGAAGTTCAGTGCCCAGCTCTACTGAGAAGAATGC
A_23_P412321	0.023464	0.000222	5.20714	0.8949	0.877798	A_23_P412321	NM_000579	AACAGTAGCATAGGACCCTACCCTCTGGGCCAAGTCAAAGACATTCTGACATCTTAGTAT
A_23_P321501	0.131926	0.00651	-3.28836	-2.35548	-1.32201	A_23_P321501	NM_182908	CCAGGAGCCTGAGGGGGTGTCTAGGTGATCATTTGGATCTGGAGCAGAGTCTGCCATTCT
A_33_P3285132	0.20713	0.0171	-2.76823	-3.27118	-1.31968	A_33_P3285132	NM_001007248	GGACAAAAACCCTTGGAGTGCAAAGAATGTGCAAAAGCCTTTTACTATAGCTCTTCCTTC
A_33_P3362359	0.206897	0.017	-2.77028	-3.26761	-1.31848	A_33_P3362359		TTCTTCAAGAAATGGAGATGCACAAGAAGCGATTCTCATCTCAATGCCCCAAGAACCCAC
A_23_P84736	0.151362	0.00861	-3.1373	-2.62266	-1.31795	A_23_P84736	NM_004389	GTGAAAAATCTGGAAGTGTAATGGTAGAACATAAAACTTGTATTGCTTCTGTTTCAGTGC
A_33_P3219095	0.270098	0.0315	-2.43559	-3.84249	-1.31736	A_33_P3219095	NR_024259	TCCAGCCTATGTCTAACTTTCTAGCAGATAATGGCAATAAAAATGTTTGGGTCCAACATT
A_23_P29153	0.200005	0.0155	-2.81928	-3.18212	-1.31674	A_23_P29153	NM_014433	CCATCAGTGTCATCGAGTTCAAACCCTGAGCCCTTCATTCACCTCTGTGAGTGAATAAAT
A_33_P3310301	0.079096	0.00235	-3.84443	-1.37629	-1.31436	A_33_P3310301	NM_182728	CCTGTCTATTTCCTGGGTGTTTACTGGCAACACAAGCCCAAGTGTTTCAGTGACTTCATT
A_23_P4545	0.242262	0.0244	-2.57457	-3.60601	-1.31427	A_23_P4545	NM_031939	GGAGGAAATGGAAAAAATTTTTCACCAGTCAGGTTAAGCAGACACGAGATTCCCTCCTGA
A_33_P3223503	0.083935	0.0027	-3.76826	-1.50945	-1.312	A_33_P3223503	NM_023037	ATCCGGGACATGATCCGCAGGGCCCAGAGTTACCGAGTCCTCACTACTTTTCTTCCAGAC
A_23_P415820	0.228189	0.0214	-2.64541	-3.48416	-1.31016	A_23_P415820	AB023136	ATGCATATTATTATTCATAGGTTATTATTATCTAAATAGAACATACTAAAAATTCATTAA
A_33_P3232637	0.303552	0.042	-2.27638	-4.10827	-1.30931	A_33_P3232637		GGGAACAGGGTTATTGCAAATGTAATTAGTTAAGCTGAGGTCATCCTGGGATAGATTAGA
A_24_P111242	0.101335	0.00382	-3.57671	-1.84599	-1.30897	A_24_P111242	NM_148893	TATAAAAATATTAGGTAATTCTATACAATGCATAGTCATAAACCTTAACATTTTTGTTCA
A_33_P3297525	0.063349	0.0015	-4.09485	-0.94203	-1.30745	A_33_P3297525	XR_132563	CAAGGAAGCTCTTACCAAAGTCATGGAGAGCAGGCAACATGTGGCAGAAGGGAAGACAGA
A_33_P3404686	0.125348	0.00575	-3.35501	-2.23756	-1.3066	A_33_P3404686	AK094115	TAGTGTAGGATTATCTGGAGCTTTAGGTTCAAAGGAAAGAGTGAGGTCTCCTGCTCCCTT
A_33_P3286112	0.054686	0.00112	-4.26019	-0.65879	-1.30533	A_33_P3286112	DA827940	TCAGGTATTGGCCTGCACTTGGCAATACATCTGGCTTTGGACCCATCCCAGAGCTTCAAA
A_33_P3241989	0.25933	0.0282	-2.49546	-3.74107	-1.30488	A_33_P3241989	NM_001130715	CTGTTGGAGAAGCTGAACTTTGAAAGAGGTGAACATAGAATTTAGAATGTTTGGAAATGT
A_33_P3329078	0.1347	0.00677	-3.26687	-2.3935	-1.30351	A_33_P3329078	NM_000559	TGCCCTGTCCTCCAGATACCACTGAGCTCACTGCCCATGATTCAGAGCTTTCAAGGATAG
A_33_P3389394	0.211576	0.0181	-2.73525	-3.32857	-1.30342	A_33_P3389394	NR_002312	AATGGCTGAGGTGAGGTACCCCGCAGGGGACCTCATAACCCAATTCAGACTACTCTCCTC
A_33_P3356245	0.025057	0.00025	-5.1331	0.77811	-0.935549	A_33_P3356245	NM_017879	TTCACACAGGAGAAAGGCCATATGAGTGTGGCAAATGTGGGAAGTCCTTTACACAACACT
A_33_P3234222	0.199747	0.0155	-2.82083	-3.17941	-1.30329	A_33_P3234222	NM_001010873	ACCCTCCTGGGTCCCCTGGTGCCGTTTTTCCTTAGAAATCAGAGAAATGGGAAAGGGGGG
A_33_P3240687	0.218718	0.0193	-2.70118	-3.38769	-1.3019	A_33_P3240687	XM_002343311	TTCTTTGTGCTGCACCCAGTGACAGGAACCAGTGTCCCGACTGTGACTTACTTCCCCCCT
A_33_P3353230	0.025057	0.000253	-5.1268	0.76814	-0.958831	A_33_P3353230	NM_001033019	AATGTTAGTTGCCTACTGTATGTTTCAGCTGGAGTGCTGTGTCAAAGGAAATCCTGCACC
A_33_P3416022	0.313391	0.046	-2.22672	-4.18985	-1.29809	A_33_P3416022	NR_026643	GAAGGTGTGAATCAGTTTACACTGTTCAGTGCCTGAATAAAAGTCACAGGACAAAGAGGA
A_33_P3394710	0.025057	0.000254	-5.12409	0.76384	-0.867977	A_33_P3394710	NM_001168398	TTTTATGCTGTGTGCTGGAGTTACGCTTGTACAGTGGAAACCAGCCCAAGCTACAAAAGT
A_33_P3423504	0.216468	0.019	-2.71136	-3.37005	-1.29741	A_33_P3423504	XM_001719394	TGCTTGTTGGCAAGCTGGACTTTCCCAATCAAGGAAGCTTGAGCGATGGCGGGGGCTTTC
A_23_P402919	0.208353	0.0174	-2.759	-3.28726	-1.29665	A_23_P402919	NM_152630	TTTGTGAGTTTCCATTTCAGTTTTTATTGACCATCACGTTTTCTATCACAACATGACCTG
A_33_P3821494	0.086143	0.0028	-3.74651	-1.54754	-1.29649	A_33_P3821494	AK094442	GCCTCCAACTTCCGCCAATCTAGCCCAAGGATGGCGCTCTAAATAAAACGCGTTCTACAG
A_33_P3334923	0.124012	0.00564	-3.36573	-2.2186	-1.29605	A_33_P3334923	NR_028138	TCTCCCACAGGCTTAGTACTAAAGCATCCCTCACACATATTTTTCAATGTAAAAATCAAG
A_32_P146113	0.093161	0.00323	-3.66912	-1.68335	-1.2959	A_32_P146113	NM_145028	GCTGGATGACAAGGACAACAGTGTCAAAACCCAAGCTCTGAATACACTTAAAGCTTTCTC
A_23_P150555	0.280088	0.0344	-2.38605	-3.92584	-1.29504	A_23_P150555	NM_006551	TATTGAAGAAATGTAGTGTGTGACATGTAAAAACTTTCATCCTGGTTTCCACTGTCTTTC
A_24_P367645	0.240489	0.0238	-2.58788	-3.58318	-1.29292	A_24_P367645	NM_152780	CTGAATGGGAAAAATGACACTAGAATGTATACTCCACACATTTTATGCCATATAATGGTG
A_33_P3412767	0.163645	0.0101	-3.05344	-2.77075	-1.29248	A_33_P3412767	NM_032184	GGGGAGGGGTTATTGTAGAATCACATGTATTTTTAAAGTATATATGTCATGAGGCCAAAA
A_24_P192988	0.320058	0.0487	-2.1941	-4.24304	-1.29232	A_24_P192988	NM_152723	GGCAGAGATCTGCCAGCTTGAGGAAAAGTTGGAGATAGCAAATGAAGACAGGAAGCATGC
A_23_P430948	0.158395	0.00937	-3.09171	-2.7032	-1.292	A_23_P430948	NM_032279	CTTGGTATTCCGTGGAGATACACAGTGCCTGCACAGTACAAAATGAAAGCATCTCAGAGT
A_33_P3251751	0.145329	0.00791	-3.18299	-2.54189	-1.29083	A_33_P3251751	NM_138809	GACAAACAGATAAATGAAGGTAAAGGGAAAAAATGGCAACTTTAGCTTTTTTCCCCATGT
A_33_P3214869	0.242903	0.0245	-2.57163	-3.61105	-1.28998	A_33_P3214869	NM_001145715	GCAGCAGTCCTCTATCTTAGTGTAACCCAAATGTGAAGCTTTTAAAACTTGACATTAATA
A_24_P453497	0.047144	0.000815	-4.43914	-0.3558	-1.2896	A_24_P453497	NM_001134363	GGCCTGTATAATTGTCTTTTCATTGTTAACACCCAAAATAGCATCTATCTAGACAGTATC
A_33_P3210349	0.117103	0.00502	-3.42913	-2.1065	-1.28946	A_33_P3210349	XR_111612	AGTGGGGTGTGCATGCCGCCTGACAGAGAAGACACTCGGGGAGGATTATGTAAGCGCTTT
A_33_P3415395	0.166903	0.0105	-3.02867	-2.81444	-1.28879	A_33_P3415395	NM_018327	CTCAGAGACTTTTTAAGAAACTGGGGAATAGAAAAATGCAACGCAGCTGTGGAAAGAAAA
A_33_P3274754	0.246894	0.0254	-2.55244	-3.6439	-1.28599	A_33_P3274754	NR_027455	AGGGGCTTGTTCTTACATCTTTTGCAGGGCTGTTTTGAAGTCAGTATTCACTTAAGCACT
A_23_P86301	0.199747	0.0155	-2.82135	-3.17851	-1.28556	A_23_P86301	NM_007123	AATATTATCAAAAGCTTAAATAAAGACAGATTGAACTCTGTACCAGCACAATCCTGCCTC
A_23_P106806	0.058511	0.00126	-4.18927	-0.7799	-1.28358	A_23_P106806	NM_031948	AACCCAAAACCATCAAGAATGACATGCTGTGCGCCGGCTTCGAGGAGGGCAAGAAGGATG
A_33_P3393851	0.054173	0.00109	-4.2713	-0.63987	-1.28276	A_33_P3393851	U15688	ATGTAGCCAATCTCTCTAGCCCTAGTCGCGTGTCGTTGTCCAATGCTCTTTCCTCTCCGA
A_24_P339869	0.027541	0.000295	-5.03376	0.6201	-0.633294	A_24_P339869	NM_020727	TCATATGCCTTAGCAGAGTAAGTCATTTTTCCATTTTACTTAGGAATAAGCTTTTTCGAA
A_32_P381593	0.112126	0.00465	-3.46992	-2.03442	-1.2814	A_32_P381593	NM_134266	TGGAATGTGGATAAAATCGATTGGGGAATATGGGTCAGTACATATGTATTTACAATATGC
A_24_P135427	0.02758	0.000297	-5.02964	0.61351	-0.827553	A_24_P135427	NR_036508	AGCTGGAACTGTTCTGTATAAACAAAGGGCAAGGTAATTGCTACATAGATTCTTTTCTTA
A_33_P3376745	0.307585	0.0435	-2.25773	-4.13898	-1.28129	A_33_P3376745		GAGTGGGTGGAGAAACTAAAGCTTCAATTCATCCACCTCTCGGGAAAGACAGACACCATG
A_33_P3384078	0.227486	0.0212	-2.65188	-3.473	-1.28086	A_33_P3384078	AK131244	CACAAAACTGATACAAACAAACTCGCAGCACAACTCCTGAGATGTTTGATGAATAAAAAA
A_33_P3260511	0.211187	0.018	-2.73945	-3.32127	-1.277	A_33_P3260511		ATGGATCCTTCCACCTTCTGGTGCAAGAGACCTGAAAGTGTGGGCGACCTGGAGCTACCA
A_24_P85850	0.127699	0.00606	-3.32703	-2.28706	-1.2765	A_24_P85850	NM_138278	GGGAGCAGCGCGTAGACATGACTGTCATTGAGCCCTATAAGAAAGTCCTGTCTCATGGAG
A_23_P66011	0.228189	0.0214	-2.64527	-3.4844	-1.27579	A_23_P66011	NM_019065	TTTTTTCTAGACAGACACTTTGGTGCAGAAGCTTCTTTTCAATCCATCCTCCACAAGAAG
A_33_P3370940	0.076717	0.00219	-3.8824	-1.31008	-1.27526	A_33_P3370940	BC044633	AATTGGGGACAGGGTGCTTATAAAAGGAGCATGTTTCCATTGAATGAGTTTCTCAAGGCA
A_32_P505133	0.249042	0.0258	-2.5431	-3.65988	-1.2744	A_32_P505133	NM_178830	CGCTTTCCTCACGGTCTGGGCTTGAGAGGAAGCCGGAGTCCTTGTCTAAAGTCAGCATCA
A_33_P3293524	0.099413	0.00368	-3.59785	-1.80875	-1.26727	A_33_P3293524	NM_004210	GCTGCTGCTTCCCTTGTGCACTTGGGTCGCTGTGATTGTGAATAAAAGTGATTTCGTACC
A_33_P3259708	0.071043	0.00188	-3.96721	-1.16266	-1.26597	A_33_P3259708	NM_001836	GAATCTCCCATTACCGGCCCTGGATCAACCAGATCCTGCAGGCAAATTAATCCTGGATCC
A_24_P272515	0.063322	0.00149	-4.09578	-0.94042	-1.26573	A_24_P272515		CCTGGCGGACAGCAAAGGCTTTGATGCATACATGAAGAAACTAGGAGTGGGAATATCTTT
A_33_P3419831	0.136075	0.00696	-3.25178	-2.42019	-1.26356	A_33_P3419831		GGTGCTCACTATGCCCTAGGTAACACTGTAAGTGATTTTCATTAAATTTAATCTCATTCA
A_33_P3299110	0.065774	0.00161	-4.0534	-1.01349	-1.26296	A_33_P3299110	NM_152432	ATCCTACTTCTCCTGCTGCTGCATAAAGAATCTCAACCTTCATTTTATTTGAACACGGAC
A_32_P79492	0.119451	0.00519	-3.41077	-2.13895	-1.26255	A_32_P79492	XR_113193	CCGCAGGGTGATGAGCCTTGGTCACAGCGTCACTGACAGATCATTAGCAGGTGCTGCAAA
A_23_P317082	0.261921	0.0292	-2.47739	-3.77176	-1.26252	A_23_P317082	NM_138780	AGAGTGTTAACCCTCAGTGGAATCATACATTCATGTTCAGTGGCATCCATCCCCAGGATA
A_23_P7342	0.310308	0.0447	-2.24253	-4.16394	-1.2621	A_23_P7342	NM_001075	ACTCTTTGGATGTGATTGGGTTCCTGCTGGCTTGTGTGGCAACTGTGCTATTTATCATCA
A_23_P44857	0.157056	0.00923	-3.09977	-2.68897	-1.26081	A_23_P44857	BC070329	ATCATTCATGGTCTAAAAAACAATGAAACCAATGAAATGGCCTCTCTGATCATCACAGAA
A_32_P88415	0.048945	0.000912	-4.37448	-0.46483	-1.26035	A_32_P88415	NM_133371	GAAAAGGAGCCTGGTGGGGAGACCACTGCACCCAAAACAAATCCTTTCTTCTTCTGAGAA
A_32_P66804	0.195698	0.0145	-2.85793	-3.11452	-1.25998	A_32_P66804	NM_002847	CGGACCAGCAGTGACCTTCAAAGTGAGCGCCAATGTCCAAAACGTGACCACTGAGGATGT
A_23_P130974	0.264576	0.0301	-2.45977	-3.80162	-1.25897	A_23_P130974	NM_025249	GCTCCCTGCAGTGGGGACTTCGTGGGAGGCACTCATGGCTCTCTGGGTCTAATGAATAAA
A_33_P3741059	0.029763	0.000339	4.9519	0.48877	0.752841	A_33_P3741059	XR_110492	GACAGGCAACCAAGACTAAGGGCAAACTTGAAACATAAATGAGTTAAAACCCACAAAAAT
A_24_P173754	0.183188	0.0126	-2.93207	-2.98447	-1.25814	A_24_P173754	NM_030806	AAAGCCAACAAGAATTCTTCAGAATGCTGGATGAAAAAATTGAAAAGGGTCGGGATTACT
A_33_P3226105	0.150996	0.00855	-3.14098	-2.61615	-1.25492	A_33_P3226105		ATTCATCCCATCCCCACGGGCCCTGTGACTTTCTACCATATCAACGTGGTGGCCTGTGCA
A_24_P257511	0.225881	0.0208	-2.66	-3.45897	-1.25435	A_24_P257511	NM_001713	TCACAGTTCCTACAAATACGGAAAAGGGGGTTAAAAAGCAGTGCTTTCATGAATGCCATC
A_23_P330836	0.045152	0.000744	-4.49148	-0.26795	-1.25429	A_23_P330836	XR_110617	TAGAGGGACTGCAGAAAATGTTACAGGTCTTAACACCATTTTGCATTTCCGCAAACGAAC
A_33_P3373046	0.038127	0.00052	-4.69869	0.0763	-1.25023	A_33_P3373046	NM_001024596	GAAGTTCTTTAGCCAAAGCTCTGACCTTATTGCACATCAAAGAGTTCATAATGGTGAAAA
A_24_P93754	0.205316	0.0163	-2.79145	-3.23071	-1.25021	A_24_P93754	NM_001146694	AAGCTAAACTCTGACTTTCATAATAAAAGGGATAAACAAAGCCTAAATGCTAGTTGTGGG
A_33_P3315982	0.253596	0.0268	-2.52284	-3.69446	-1.24839	A_33_P3315982	BC114619	TGCCATCCCAGGGTCTCAGCTGTCACTATTGCAGACATTTGCCAGGGGAGGTTTCAGTGA
A_24_P667968	0.082598	0.00263	-3.78207	-1.48526	-1.24171	A_24_P667968	NR_026964	CAAACCAAACAGGATGAGGAGGGCAAATCGGCCGTCCCCAGTAAATCCTAGGGAGTCCCT
A_32_P104432	0.205667	0.0164	-2.78914	-3.23475	-1.24057	A_32_P104432	NR_024493	TGGCCAGAGAGATGTTCTTGTTTCTGGTGTTGTCACGTCTTCTTGTTTTCTCTAAGTTTA
A_23_P144746	0.195354	0.0144	-2.86115	-3.10888	-1.2401	A_23_P144746	NM_182594	TGTATGGAAGACCTTTGAGACTGAGTAGATGAATTATTGAATGTGAGATAATCCGTTCTA
A_32_P23125	0.075748	0.00213	-3.89914	-1.28093	-1.23958	A_32_P23125	NR_001558	CATTGTCCAGTAGAGCTGTTAGTTTTAACACCAGTGAGTATTACCTTTGGTTAAAAGGAT
A_33_P3345126	0.18535	0.0129	-2.91919	-3.00709	-1.23841	A_33_P3345126	NM_198539	GCTGCGACAATTTTGAAAAGAATAGAGGAAACACCCTCACTGTATGATATAAAGTTATAG
A_23_P114307	0.198704	0.0153	-2.82736	-3.16801	-1.23811	A_23_P114307	NM_002565	TCGTGCCCAACCTGTTCTTTGTCACAACCAGCAACAAAGGGACCACCGTCCTGTGCCATG
A_33_P3265111	0.198704	0.0152	-2.82958	-3.16412	-1.23737	A_33_P3265111	NR_027148	TTTTCCCAGAAAGGGACAGAGACGGCGAAGTTTGACGGTCTGGAAAGCAGAGACCAGCAG
A_23_P251412	0.174115	0.0114	-2.98687	-2.88807	-1.23727	A_23_P251412	NM_006998	ATTTTGTGCTTTTCTTGTGGGCTTTCTGCTTAGTCTGAAAGGTGTGTGGCATTCATGGCA
A_33_P3565133	0.211187	0.018	-2.7393	-3.32152	-1.23704	A_33_P3565133	NR_033986	GTCCCTTGTCTATTTCCTGCTTTTATCTGGATGCTGAGTTAATTATTTGATCCAACAATA
A_33_P3234303	0.262375	0.0293	-2.47477	-3.77621	-1.23696	A_33_P3234303		ATATTCAAACAAACGGACCAATTGCACCAGGCGGGGAGAGGGAGCATCCAATCGGCTGGC
A_23_P143334	0.278029	0.0339	-2.3941	-3.91233	-1.23673	A_23_P143334	BC126936	AACAGCATTCTATCATGGAAGGAGGAGATGAAGGGCAAGGGCCAAAATGATGGATGCATC
A_33_P3314531	0.151898	0.00865	-3.13443	-2.62773	-1.23597	A_33_P3314531		CCCTGCAAAGAACGGAGAGAAGGTACTCAAAGGAGAAATGGGAAAAGCTGACACTGGCAA
A_33_P3242973	0.300825	0.0412	-2.28765	-4.08966	-1.23578	A_33_P3242973	NM_006548	GAAAATGAGGAAATGATCGTCAGAATTATCGGGCACTTCTTTGCTAGCCAGACTGCACAG
A_33_P3383044	0.205476	0.0164	-2.79043	-3.23248	-1.23208	A_33_P3383044		ACAGACAACACTCTTAGGTACAGGTTTACATTCACAAAGATTTGCACAAACACACACAGA
A_23_P325661	0.031837	0.000383	-4.87829	0.36983	-0.75641	A_23_P325661	NM_003435	TGCTGGTGGCTTATACAAAAAGTTTACTTTCTTCATGGATATTCTTGGTCTCACATACTT
A_32_P82111	0.262973	0.0296	-2.46924	-3.78559	-1.23196	A_32_P82111	NM_020737	ATGCCGGACTGAGCCCTGAGTGTTTGGAAAGGCGAGACTCCGCCTTTCTAATCACAAATG
A_24_P941898	0.206636	0.0169	-2.77328	-3.26239	-1.22706	A_24_P941898	NM_001009610	TGCCCCCGTTAGTGAACATGCTGTGCTTTCTGACAGCTATGAGGATGGACTTGATCCAGG
A_24_P152649	0.03213	0.000389	-4.86901	0.35477	-0.874948	A_24_P152649	NR_033748	AGTCAAGATCAGATTCTAGTGTTCAATAACCCTATGTGAATCAGCTGTCTCCTGGATAAC
A_33_P3359923	0.311664	0.0452	-2.23631	-4.17414	-1.22597	A_33_P3359923	NM_001144874	CTATGTGAAGCCACCTTTGTAATACTGCCTTAAGTAAAGATCCAGTATTATTTTTCTCCA
A_23_P333029	0.206183	0.0166	-2.78305	-3.24537	-1.22187	A_23_P333029	NM_173549	TTTTCTGTAAGGAGTGTGGTTATAGAGAGACTGTTGGAACCATGAGAAGGATGTTTCTGT
A_33_P3225268	0.032347	0.000394	-4.86157	0.34269	-0.871066	A_33_P3225268	NM_001004128	AACTCTGGACCCTGGGAAGCCTGAGATGATGAAGTCCCCCACAAACACCACCCCACATGT
A_23_P14515	0.032461	0.000397	-4.85709	0.33543	-0.906215	A_23_P14515	NM_152331	AGAAGTGAGTTGTATGCCCAAACAGTCTCTGAACGGTTACAGGCCCATGGAAAGGAAAAA
A_33_P3321205	0.274236	0.033	-2.41024	-3.88521	-1.22048	A_33_P3321205	NM_001159531	TGATGCATGCCCTGCCAGTTAGTACTGTATTTTGCATTCATTAATAAAAGACACCGGTGG
A_33_P3348509	0.033636	0.000413	-4.83421	0.29822	-0.682152	A_33_P3348509		GAACATACTTTCACGTTACACTAAGTGTGTCTAGCGGTCTGTTGCGTTTTGTAAGCTCAC
A_33_P3242909	0.16667	0.0105	-3.03111	-2.81012	-1.21914	A_33_P3242909	NM_145276	TCTACCACCCCCTGGGCATACATAAATCGACACATGCCAAGTCCTTTTTTAAAAATGACA
A_23_P129144	0.175641	0.0117	-2.97354	-2.91154	-1.21897	A_23_P129144	NM_001018100	TAGATGACATGGTGCATTGCCAGCAGAAGAAAGTCAAGCAGATGGTCGAGGAGATTGAAT
A_33_P3334748	0.318444	0.048	-2.20296	-4.22863	-1.2188	A_33_P3334748	CN282820	ACACTTACCCTTCATCTAGTCCTGAAAGGTCCCCTGAGTGCAGGTTAGATTGTGGAGGCT
A_33_P3615334	0.030062	0.000346	-4.93874	0.46757	-1.21866	A_33_P3615334	AK128015	GGCTGGAGTTCCTGGTCCAATTTTTAAAGAAAACAAGAGAATAAAAGGCCCATAAAACTC
A_23_P208208	0.03403	0.000424	-4.81905	0.27353	-0.851463	A_23_P208208	NM_023074	CAGTCAGTCTATGGTGTATTTTTTCTAGTAGCCTGAACTGACTGAAAGAAAATCATGAAC
A_24_P281395	0.184676	0.0128	-2.92186	-3.0024	-1.21803	A_24_P281395		AGATTTGTAAGAAATGCCCTCTGGGAACCAAAACCGAAAAATGCATCCAAAGTTGCCTAT
A_33_P3391076	0.034036	0.000425	-4.81745	0.27092	-0.721851	A_33_P3391076	NM_207304	TGATCGACACAAGTGACAACACCGTAACCGTTTGTATGGATTACATAAAGGGGCGTTGCA
A_23_P305205	0.111815	0.00461	-3.47477	-2.02585	-1.21726	A_23_P305205	NM_015314	AAACAGTGTCTTAGAAGTATAAACAGAAATGGCAATATTTATGTCCTGTGATTCAAGCCC
A_23_P119222	0.227486	0.0211	-2.65231	-3.47225	-1.21678	A_23_P119222	NM_020415	CAATAAGCAGCATTGGCCTGGAGTGCCAGAGCGTCACCTCCAGGGGGGACCTGGCTACTT
A_23_P126917	0.161006	0.00963	-3.07683	-2.72946	-1.21636	A_23_P126917	NM_001542	TTGGCATTCTTATCATCACCATCCTTCTGGTGCGTTTCAAGAGCCGGAACTCCAGCAAGA
A_33_P3244478	0.18295	0.0126	-2.93337	-2.98219	-1.21574	A_33_P3244478	NR_028389	GTACACTCCCTCAGGGTTTTGCATCTTCTTAATGGCAGAAACCTAGTCAAACAAAATATT
A_33_P3263423	0.130518	0.00632	-3.30421	-2.32743	-1.21563	A_33_P3263423	NM_003268	TTAAACAACCAGGGACCCTCTGCCCCTAGAATAAGAACATACTAGAAGTCCCTTCTGCTA
A_33_P3348625	0.034721	0.00044	-4.79747	0.23832	-0.938233	A_33_P3348625		TTCCTTGGAAGCATTCAGTCTGGGGAAAGTCAGTGAGTGAGAGGCTGGCGCTGACTCCAG
A_23_P500000	0.145357	0.00793	-3.18116	-2.54512	-1.21558	A_23_P500000	NM_144777	TCTTCAATAAGGTCACACACATAAAAAGAGCCATCTGGTCTCTGGCTAGAGTTAGCAATA
A_33_P3370600	0.287877	0.0368	-2.34911	-3.98762	-1.21494	A_33_P3370600	NM_001162997	TTTGCCATCGTGTTTGGTTTACTCACTTCCACAGAAAACACTCAGTGTGAAGCGGGTGAA
A_33_P3282880	0.169713	0.0109	-3.01027	-2.84687	-1.21487	A_33_P3282880	NM_194463	TCTTTAAATATAAAATGTAAATAAAATATTCCAATAAAAGTTTGTGTCTGGTGTTAGTTT
A_33_P3224281	0.164349	0.0102	-3.04524	-2.7852	-1.21223	A_33_P3224281		AATTTCTTCACCCACCCTTACCAAATGTCGATTTTGTGGGGGAACTCCACTGTAAACCAG
A_33_P3288609	0.0967	0.00344	-3.63413	-1.74489	-1.21196	A_33_P3288609		ATCCTGACTACTACAGTAGCCCTCCCAGAAATCGTCCCAAAATTGTCTGATAGAAAGGCT
A_23_P387184	0.056103	0.00116	-4.23694	-0.69843	-1.21159	A_23_P387184	NM_020464	AACCAGAGTTTAAACTTCCATTAGGCAATTTCCTGTCACTTGAAATGTCAACATTTGCTA
A_33_P3240578	0.320126	0.0488	-2.19348	-4.24405	-1.21049	A_33_P3240578	NR_027906	CCATCTTCTATTCTCATTGCACCACTGGATTCTGGTACATCTAAAAATTGTACTTAAATG
A_33_P3253902	0.202624	0.016	-2.80443	-3.20807	-1.20943	A_33_P3253902		AAGGTGATGACATCAGTGGTGTGATCGGGATGGCTGGGGACCAGATGTCAACACTCCCTG
A_23_P201181	0.036003	0.000465	4.76403	0.18363	0.959062	A_23_P201181	NM_012411	TGGGGTGGAACATCTGAACCAAAGAAATTTGATGACTCTGTGATACTTAGACCAAGCAAG
A_33_P3631022	0.159052	0.00943	-3.08814	-2.70949	-1.20923	A_33_P3631022	AJ315134	GCTTTCAAATTTTGTGGTTAAAAAAGATGATGAGTTTCTAAGACGTGGGGGCTAAAGCTT
A_32_P117812	0.176431	0.0117	-2.97017	-2.91747	-1.20904	A_32_P117812	BX640928	CAAACCGTGTACAGCTTCTTGTGTGAACTGTTGACTACAAACATTTACCAAATACATAAA
A_23_P415470	0.029379	0.000332	-4.96325	0.50703	-1.2074	A_23_P415470	NM_032100	CTTATAATCTGTGCATTGCACATACGGGTACAAAAGAGTTTAATTTCCTAAAATGCAGTG
A_33_P3400192	0.036482	0.000476	-4.7503	0.16112	-0.708549	A_33_P3400192	NM_001135044	CCTCATCTCAGATTCACTTGTTGCAACCTATAAATAAGGACGTCTTTATTTTGCAAGTAA
A_33_P3423859	0.036482	0.000477	-4.74883	0.15871	-0.706545	A_33_P3423859	NM_006242	GCTGGGTTGTCCCCCCAAACATATTTTAATATGTTATTTAAAATGATTTTACCCAAGCCT
A_24_P97770	0.036482	0.000479	-4.7475	0.15653	-0.745031	A_24_P97770	NM_001031711	GACAGCGGTGGCAAGATCGACGTCAGTCTGAACATCAGTTTACCCAATCTGCACTGCGAG
A_33_P3260426	0.258403	0.028	-2.50007	-3.73323	-1.20702	A_33_P3260426	NM_005988	AGAATTCATCAGGACCAAGAAAGGATAAGGATATTTGGCTCACCTCGTTCCACAGCTCCA
A_24_P156922	0.073818	0.00204	-3.92159	-1.24187	-1.20609	A_24_P156922	NM_001007098	CCTGACACCAAATGATATTGACGTAATAGAACTTCACGATTGCTTTTCTACCAACGAACT
A_33_P3351920	0.036825	0.000486	-4.73894	0.14248	-0.715627	A_33_P3351920		TACGAAACATTGGCTCCTCTGGAAGGGGTGCTCTCCAACCCTCAGTATCCTCAGTGGCCT
A_24_P49190	0.049929	0.000949	-4.35205	-0.50276	-1.20531	A_24_P49190	NM_181655	GTAAGCGCACTAGTCAAAAGACATTTATGTTTGAAATGTCATTTAGATCAAACACAAGGG
A_33_P3315698	0.272419	0.0325	-2.41775	-3.87256	-1.20518	A_33_P3315698	NM_001206673	AAGCAGCCCTTCGTGATGGGAACCCAATTATTGTTTATCTTCATGGCAGTGCAGAACACA
A_23_P308632	0.220237	0.0196	-2.6922	-3.40326	-1.20391	A_23_P308632	NM_152769	AATGCAAGACGCATCCCCTGCAAAACACACTGGCTCATTTTAAAGCTCTCACCTTCCAAG
A_23_P49499	0.036482	0.000479	-4.74703	0.15575	-1.20298	A_23_P49499	NM_006456	TACCCCAGATGCTAAAGTGATTCAAGGACTCCAGGACACCTCTTAAGAGCCTTTCTAAGA
A_33_P3221960	0.036907	0.000492	4.73116	0.12971	0.674208	A_33_P3221960	NM_003853	ACAGAACTCACAGCTCTGTGTGTGTGTGTTCAGGCTGATAGGAAATTCAAAGAGTCTCCT
A_23_P115919	0.174401	0.0115	-2.98309	-2.89473	-1.20247	A_23_P115919	NM_001037537	TTTCGAGCTCGACTTGTGAAAGGAGAAAGAACCAATCTTTGAAATAGCCATCTGCTATAA
A_32_P379379	0.154937	0.00896	-3.11577	-2.66071	-1.2019	A_32_P379379	NM_173681	CTCCTTCGATGCGTGGATTACAATGTTCTCTTTGCCAACCAACCAAGTAACCATACCAGA
A_33_P3256278	0.180641	0.0122	-2.94911	-2.95452	-1.20179	A_33_P3256278	BC101978	AAGAGGGGATGGATCTCAGCCATCACAAAATAGGGGGCCTTTATGTTCAGGTTTTGCCCA
A_33_P3310562	0.2426	0.0244	-2.57341	-3.60799	-1.2017	A_33_P3310562	AY927497	TAACCTCCAGTTGTGCCAGATTATGATACGGGCTCGCAGGAACAAATGACTTTCCTATTG
A_24_P281009	0.146159	0.00804	-3.17407	-2.55765	-1.20169	A_24_P281009	NR_002817	CACTGGTGATAGGCATCCTCGTGGTCATCATCAGGGTGTACCATGGCATGAACACAGGAT
A_23_P33984	0.235196	0.0227	-2.61281	-3.54033	-1.20108	A_23_P33984	NM_020665	ATCCTGTTATCACACCAACAGTTGATTATATATTTTCTGAATATCAGCCCCTAATAGGAC
A_33_P3241051	0.207666	0.0172	-2.76463	-3.27746	-1.20058	A_33_P3241051	NM_139057	CATTACATACTGTACCCATGGAATTTTTGTTTTACTTTTTGGGGCTGGTTTTGAAAGGAA
A_33_P3223497	0.295772	0.0397	-2.30752	-4.05677	-1.19949	A_33_P3223497	NM_023037	ATGGATGACACAAACAGCGAGCAGCAGTTTAGAGTCTTCAGAGACTTCGACTTCCTAGAT
A_23_P142403	0.266695	0.0306	-2.4505	-3.81731	-1.19774	A_23_P142403	NM_001001524	TGCAAGAGGAACAAAGAAAGGGACTCCTGCAGCGTCCGGCTGACCTGGCCCTTGTCATAT
A_33_P3342938	0.155655	0.00907	-3.10919	-2.67233	-1.19717	A_33_P3342938	AK098174	AAAGCAAACGTGGAGAGCTCACTCTGCAGAATAAAATCAAGAACACCACGGTTGTAGCTG
A_33_P3702906	0.264576	0.03	-2.46151	-3.79867	-1.19703	A_33_P3702906	CN273640	TGATGGAAAGGGGAAAGGTCAAGGTTTGGGTAGGAGGAAGAGGACTTCCCACCCAGTGCT
A_33_P3410584	0.183413	0.0126	-2.9299	-2.98828	-1.19641	A_33_P3410584	AK057937	AGACAGGTAGATCAGTTGACCCCAGGAGTTCTGGGCAATACAGTGAAATTCTGTTTTCAC
A_33_P3219138	0.27684	0.0336	-2.3993	-3.90359	-1.19604	A_33_P3219138		CAAAAGAAAAGGCAGGCTCTTCCTTTCATGCTTGTTGTCTTAGTTTTATTCTAATTCCCC
A_24_P265265	0.190291	0.0136	-2.89225	-3.05438	-1.19534	A_24_P265265	AJ311797	GAGACTAAAGCCGAGAGTGTAGATAGCTCTGGGAGTGTAGATCAGTCAGTCAGTCATATA
A_24_P151692	0.185943	0.013	-2.91546	-3.01365	-1.19442	A_24_P151692	NM_024921	GAAGAAAACAATCTCTCTCTTCGACATACACTATCAGACATGGAATACAGACTAAAAGAA
A_32_P28223	0.305859	0.0426	-2.26831	-4.12156	-1.18953	A_32_P28223	AF074986	TTTTTCTTTTAGGAGGAAACCATTGGCTTCTGGTTAGAGTTCTAAGAAGGGAAACTGGCG
A_23_P138910	0.071043	0.00188	-3.96808	-1.16114	-1.18908	A_23_P138910	NM_013264	CAGGTCACAATTGTTGTGAACTTTGATCTCCCTGTAAAACAAGGAGAGGAGCCGGACTAT
A_33_P3242778	0.05871	0.00128	-4.1825	-0.7915	-1.18869	A_33_P3242778	AK127110	AACATGTGGTCCTTTGTGTCCGGCATCTTTCACTTATGTTTTCTCCATTACTGCCGCCTT
A_23_P61524	0.153544	0.00884	-3.1231	-2.64775	-1.18818	A_23_P61524	NM_022903	CCAGCCATTGCTGCCATATTCAGCAGTCTGATTCCTTCACACGGCAATGTTTGGGGAAAC
A_33_P3282434	0.195354	0.0144	-2.86106	-3.10904	-1.18652	A_33_P3282434	NM_001166496	CTTACCTTCTATAAAAATGAGGATTACTGTTGGTGAGGGAATAAGGAATGTAAGTAAAGG
A_33_P3312661	0.03939	0.000557	-4.65825	0.00957	-1.18623	A_33_P3312661	AK090819	AAGTACCCCCACATTGGTTTGTTATGGGTTGAACTGTTTCCCCCAGAAATACAGCTCCAA
A_33_P3278856	0.164014	0.0101	-3.05017	-2.77652	-1.18607	A_33_P3278856	NM_024921	GATCTGAGCCGTAAGAATACGGATCTATATCACTGCTTATTAGAACATTTGCAGAGAATT
A_24_P937855	0.038368	0.000537	-4.67962	0.04487	-0.722488	A_24_P937855	NM_001102396	CTGCATTCATCTCCACAGAGGTACAGCAAAAGTGATTTAGTTAGCGATAACCTCTAATTC
A_33_P3370848	0.038581	0.000542	-4.67519	0.03755	-0.856797	A_33_P3370848	NM_014209	TTGCTCCGAACCGAGCCCGCAGTCGGACCGTGCCAGTTTGGCTCGATGCCCCAAAACTAA
A_23_P33847	0.067233	0.00169	-4.02666	-1.05969	-1.18446	A_23_P33847	NM_006950	GAATCCCCAAGTCCTTTTAGAACCCCACTCGTGGTCACTTCAGGATCTACTTCTGTTTTA
A_33_P3418511	0.310405	0.0447	-2.24197	-4.16486	-1.18353	A_33_P3418511	NR_027756	GGCGGCGTTCCCAGGAAAATTCTAACTAATCATAAAAATAGAAAGAAAAACGCAACCTAA
A_23_P415006	0.039329	0.000555	4.66035	0.01304	0.798659	A_23_P415006	NM_015470	GAAAGCCCCTGTAACGTTACCTACCTTAAACTCCACTCATCAAATCTGAGAAAAGTATCC
A_33_P3322879	0.247334	0.0255	-2.55054	-3.64715	-1.18065	A_33_P3322879		CCTGGCCCACAATACTGTTGTATAGAATTTAAAGAAATAAATACCTCAATCCATTCAGGA
A_23_P315836	0.126367	0.00589	-3.34226	-2.26012	-1.17932	A_23_P315836	NM_017451	GGACTTTATCATCGGCAGACCTCAGAAGACAACACACAAAGGTTTCTTTTTTCTTAGCTT
A_24_P944991	0.113337	0.00476	-3.45813	-2.05525	-1.1787	A_24_P944991	NM_173829	TAGGTAGCCCTTATGTCCACTAAAGTAAATGCTTATGTTGTAGAAGCATCGAACATCAAC
A_33_P3333177	0.127512	0.00602	-3.33009	-2.28164	-1.17849	A_33_P3333177	XR_112044	TTTTTAACCTGTTTCCAAAACCAGACATGTTCTAAGGGGGGCGACCCAGGAATTCCTCAT
A_32_P141488	0.276845	0.0337	-2.39878	-3.90447	-1.17738	A_32_P141488		AAACGAGACTGCAAATTCTCAAGACTTCAAACCCCTTCAATCTGGGTAATACAAAGGAAG
A_23_P5742	0.040054	0.000573	-4.64252	-0.01645	-0.674786	A_23_P5742	NM_024584	TTTAACAGGGGTCCTCTATGGGAAAATAGGATGAACTTTGTTTCCCAGAAATTGTTAAGT
A_33_P3223860	0.227767	0.0213	-2.64892	-3.4781	-1.17689	A_33_P3223860		TGGGAGGAAACCTTAGATCGGTGTTTGTTAAACTGATCATTCTTCACGGGAGTAAGAAAA
A_33_P3310744	0.254839	0.0271	-2.51703	-3.70436	-1.176	A_33_P3310744	NM_001242672	CTGAAGAGACTGAAGGCCAGAATCCGGAGGGAGGCATCCTCAGGCTGCTGGCTACAGTGA
A_33_P3331996	0.072354	0.00196	-3.9434	-1.20397	-1.17521	A_33_P3331996	XM_003119816	CATTTCCAAGCTCATCAGTGTGATTGGGAATATCATGTGCTATAGTTGTGATATGTGGTC
A_33_P3364205	0.040179	0.00058	-4.63518	-0.02859	-0.668481	A_33_P3364205	NR_001588	CTGATCAAGGTCATAGAAAGTAAAGATTATGGCCAACAGTTAGAAATCGTAAGAGTCAAA
A_33_P3320077	0.049929	0.00095	-4.3516	-0.50353	-1.17512	A_33_P3320077	BX648416	GTTGGGGCGACAAAACTTAAATGCTAGAACCAATAAAAGAAGATTACAAAGCAACTCGCA
A_33_P3356182	0.179004	0.012	-2.95623	-2.942	-1.17161	A_33_P3356182		AAGGCAAAATCCTAGCTTTCAAAGGGAAAGGCGGGGGGAACCTGTGAGTGGTTCTCCGGC
A_33_P3354106	0.248143	0.0257	-2.5461	-3.65475	-1.17099	A_33_P3354106	NM_001145715	AATTGAGGCTTTACAGCTGCATGAGAACCGTCAAATTGGCCAGTCGGCTTTGAACATCAT
A_33_P3351356	0.046576	0.000781	-4.46357	-0.31476	-1.16925	A_33_P3351356	BC040474	CTGAACAAGGTTGAGAGAGGTTTTCTTCAACTCTATTCCAAAATTATTTTTGCTTTGTGC
A_23_P207037	0.040819	0.000595	4.62043	-0.05304	0.775466	A_23_P207037	NM_007261	CACGCAGAGTGAGCTGCACTACGCAAATCTGGAGCTGCTGATGTGGCCTCTGCAGGAAAA
A_23_P131215	0.303552	0.042	-2.27644	-4.10817	-1.16872	A_23_P131215	NM_006891	GAGTTCACTGAGGACTGCTCCTGTCTTCAGGACCGCTTCCGCTTCAATGAAATCCACTCC
A_33_P3725227	0.149907	0.00844	-3.14763	-2.60439	-1.16843	A_33_P3725227	NM_015198	GAAATGTGTTTTGCCTCTGAATATCTTAAGTTGCTAATAAACGATTCTTGTTGGCAGGTT
A_23_P363954	0.09707	0.00348	-3.6289	-1.75408	-1.16748	A_23_P363954	NM_003251	CCTCACCGAGAAAGCCCAGGAGGTGACAAGGAAATACCAGGAAATGACGGGACAAGTTTG
A_33_P3300740	0.186029	0.013	-2.91385	-3.01646	-1.16668	A_33_P3300740	BI056255	CAGGCAGTCCCCATGTAGGAGGCTTACTAAAAGGGCCTATTTCCTCACTGGTTTAAAAAA
A_24_P370096	0.041326	0.000608	-4.60791	-0.07379	-0.86282	A_24_P370096	NM_006300	GAAACCTTATATTTGTGAGAAATGTGGGAGGGCCTTCATTCACGATTTAAAGCTTCAGAA
A_32_P46594	0.177823	0.0119	-2.96292	-2.93024	-1.16656	A_32_P46594	NR_026979	AACATAATATGGTCCTGAATGAGGCTGAGTCTTTGGGCGCAGAAGACCCGGGTTAATAAA
A_23_P167983	0.262609	0.0294	-2.47222	-3.78053	-1.16531	A_23_P167983	BC050602	GCATTATGCAAATGCATTATATTTTATGTAACCTGTCCACTGTTGGTAGGCACTTGAGTT
A_24_P20032	0.041575	0.000616	4.60027	-0.08647	0.909624	A_24_P20032	NM_000449	TGGGAAAAGCAGTAAACCAACTAATATTTATTGAAGACCTACTTTGTCCTCTACATAGGG
A_23_P73637	0.089848	0.00304	-3.70256	-1.62463	-1.16426	A_23_P73637	NM_031273	CTTCACCAGCAAAGGTCACAGAACGGGTTCCAACTCAGATGCCTTTCAACTGGGGGGCCT
A_23_P4494	0.194186	0.0142	-2.86926	-3.09468	-1.16412	A_23_P4494	NM_024422	CCATCCTTGCAATATTGTTGGGCATAGCATTGCTCTTTTGCATCCTGTTTACGCTGGTCT
A_23_P308150	0.041721	0.000622	-4.59439	-0.09625	-0.939436	A_23_P308150	NM_152424	CAACATATACTTCTTTGCTGAATGCTAATAAACTTCTGGGTTCAAGAGGGAACTCCTCAG
A_33_P3272361	0.290503	0.0377	-2.33658	-4.00849	-1.16394	A_33_P3272361	NM_030877	TTCCGGGAGAACGAGCAAAAGCGCATCCTGGGCTTGCTGGAGAACTTCTAGAGGCACCTT
A_33_P3366048	0.307564	0.0434	-2.25843	-4.13784	-1.16329	A_33_P3366048	NM_080616	TGATCAGAAGGATGTATCCCCATACCTAACATTCCATATCACTACACTGATGTGGGCTGG
A_33_P3680789	0.239559	0.0236	-2.59226	-3.57566	-1.16303	A_33_P3680789	NR_038222	CTCCCAAAAGCAGTCAATTTTAACCCATTCCCAACAGGCTTGAGAATAAAAGTTTCAGCC
A_33_P3368945	0.243029	0.0246	-2.57037	-3.6132	-1.16221	A_33_P3368945	NR_024418	GTCTCACATCTTCAGGGGCGCATTTCTACAATAAAAACTCACCCAATTAGACCTAAAAAA
A_33_P3354792	0.198704	0.0153	-2.8274	-3.16794	-1.16206	A_33_P3354792	XR_112948	ATTTTTGTAAGTGAGGTGGGGGTCACCACAGGAAGAGAGGGGAGGCAAACCTCCCTTCCC
A_33_P3271316	0.196664	0.0147	-2.85041	-3.12768	-1.16104	A_33_P3271316	NM_017793	ACTGAACAGCTTCAAAATGGTGCAAGGCACTGCCCAGTCCCTGGCTTCTTCCTCTCTCCT
A_33_P3329557	0.108206	0.00436	-3.50578	-1.9711	-1.15942	A_33_P3329557	XM_003403453	AAGAAGACAGGCTGGTGCTGCTGTATTTGTATTTATATCCATTGCTGCGCTCTGCGTTCT
A_24_P358591	0.056103	0.00116	-4.23752	-0.69744	-1.15932	A_24_P358591	NM_001105519	CAAAGAAGAAGTGGCACCTTTTAAGACTAGCCCCCGAGAACCTGAAGACCTACCAGACCT
A_23_P81683	0.271332	0.032	-2.42649	-3.85783	-1.15732	A_23_P81683	NM_148963	TACTTCATAGCTTGGATCACATTCATCCCTATCTATGCTACCACATTTGGCAAATATGTA
A_33_P3325349	0.100398	0.00374	-3.5886	-1.82505	-1.15691	A_33_P3325349	NM_005723	AGTCGTTGCGCCGTGAATCTCTACTGTAGCCATGAATTTATGGACAGTTAGATGCTTACC
A_33_P3294149	0.205532	0.0164	-2.78986	-3.23348	-1.15588	A_33_P3294149		TTCGGTGTCCTGAAGCCATGGCTCCATTACAAACTGTCCGCAGTGTCCCCAACCGCAGAA
A_23_P420293	0.218807	0.0194	-2.6997	-3.39026	-1.15504	A_23_P420293	NM_145013	TCCTCCTGGATCTCACAGAAGATGTATGAAAAGTCATGGCCATGAAAAGGGCACGGAAAT
A_33_P3219755	0.106967	0.00429	-3.51459	-1.95555	-1.15357	A_33_P3219755	NM_001164446	TGTCCCCGATGTACCCATACTGACCTGGTCACGAATCGCCTTGAGAGGCTGGAAACTCAC
A_33_P3281066	0.042751	0.000655	-4.56484	-0.1454	-0.68955	A_33_P3281066	NM_001098402	CTTGGCATTATAAATTCAGTATCCCAGGACCTAAACCTTTATGCTACATTTTCGAAGATT
A_23_P208636	0.100763	0.00377	-3.58397	-1.83319	-1.152	A_23_P208636	NM_016148	TAAACCTCTGGGGTTCTGGACCAAGTTCGACGTGGCTGATTGGCTGGAGTGGCTGGGTTT
A_33_P3276282	0.263704	0.0297	-2.46649	-3.79024	-1.15068	A_33_P3276282	BC048416	CGACTTCTTGGTGTATGTGCATGTGTGTGTGCACACACGGGCACACTTATCTGTGTGTAA
A_33_P3303250	0.287841	0.0368	-2.35015	-3.98587	-1.14831	A_33_P3303250	XR_109859	TCTGTGACTGTCCTGCAACCAGATAGAGGCCTGAGGGACTCTGCACAGTTTCTGGGCTGA
A_33_P3369436	0.300266	0.041	-2.29046	-4.08502	-1.14774	A_33_P3369436	XR_109206	GCTAATGAGTTTTGATATGTGAACATTTCTTCTCCTTCATAGGTAATGTGTTGATTTGGC
A_23_P368718	0.038127	0.000527	-4.69125	0.06404	-1.1469	A_23_P368718	NM_020456	TTTACATAAATCCCAAATTCTACCTCTGAAGGTATATGAAATTTAACTATGTATGTATTA
A_33_P3307119	0.120411	0.00528	-3.40117	-2.15591	-1.14551	A_33_P3307119	NM_001004759	TATCTGCTCTTACCACCTGTGCTGAACCCTATCATTTACAGCTTGAAGACCAAGACAATC
A_32_P88905	0.076717	0.00218	-3.88554	-1.30462	-1.14344	A_32_P88905		ATGGATGTAACAAGTTGCATGTCTGGGCTTTATTTCAGTGTATTAATTGTGCGATCTTTT
A_23_P254079	0.195449	0.0144	-2.86008	-3.11075	-1.14249	A_23_P254079	NM_003943	CACTGATTGACAGACTTGTGCTGATCCATTATTACTTTAGGGCTTGATTCTCTTGGGGAG
A_33_P3369535	0.206183	0.0167	-2.78006	-3.25058	-1.13984	A_33_P3369535	NM_004742	GAGTGTTGCCTTAGACTGTCTGACTGGACAAATAAACTCTCTTTGCCCTATGTTAACAAA
A_23_P382506	0.245574	0.0252	-2.55784	-3.63466	-1.13982	A_23_P382506	NR_002169	ATATTTCAGAACTTCATCCTCCCACTCAGCTCAGAGAGATATAGCAGCTGCTGTGAGGTT
A_33_P3365501	0.280383	0.0346	-2.38418	-3.92897	-1.13877	A_33_P3365501		CAATATCACAGAGACAGGCAATAACAAACAATAACAATACAGGCTCCTGGGACATTTACA
A_23_P38813	0.04358	0.000682	-4.54141	-0.18446	-0.710088	A_23_P38813	NM_207333	AACCTCACAAGTGTGGTGATTGTGGTAAAGCCTTTAATTCACCTTCACACCTTATTAGGC
A_24_P39928	0.310157	0.0446	-2.2434	-4.16252	-1.13875	A_24_P39928	NM_001080468	GTGGTCCCGGCAAGGCAAGGCGGGCAAGACGCACAAGTTCTCTGCCGGCACCTACCCGCG
A_33_P3309222	0.195698	0.0145	-2.85766	-3.11499	-1.13806	A_33_P3309222	AL832737	TTCACGCTCCTGAGCTGCTTTATCAAACTAGGATTGTTCCCCCAGGTCTAAGAAAACCAT
A_33_P3342942	0.264576	0.0302	-2.45866	-3.8035	-1.13784	A_33_P3342942	CR749827	CCAGCAAGGAAAATCTTTTCATGGTGAATTAAGTGGTGGATGAAGAAAAATGGTGATGAA
A_23_P68401	0.299104	0.0405	-2.29618	-4.07556	-1.13615	A_23_P68401	NM_030877	CAGGAAGATCAAGAAAGTGGGAACCACTGAGAAGGAACATGAAGAGCATGTCTGTTCGAT
A_24_P352388	0.24741	0.0255	-2.55005	-3.64799	-1.13571	A_24_P352388	NM_031264	CACATATCGAATTACCAACCACTCACACTTCCGGATGGAGGGAGAGGTTGTGCTGACCAC
A_33_P3321324	0.08703	0.00286	-3.73645	-1.56517	-1.13373	A_33_P3321324	XR_108343	AAGTCGCGGTCTGGGGATATTGGGTCCAGCCTTCGGGTAGAAGCAGGTGATAAACGCACT
A_33_P3262171	0.219286	0.0195	-2.69709	-3.39478	-1.13352	A_33_P3262171	NM_001039112	AGCATGAAATAAGGCACTTTCACCTCATGGTAATCAACAATGACCTCAAATTGACTTAGA
A_33_P3306834	0.213673	0.0185	-2.72451	-3.34723	-1.13201	A_33_P3306834	AK126842	CTATTCACATGTGAAAACATATGAGCAATTTTTGCTGCATCAGAGATACCAGAGATTCTT
A_33_P3385567	0.301634	0.0414	-2.28501	-4.09403	-1.13191	A_33_P3385567	AK128317	ATTTTGCAATGTCAGGAGACATTTTTGGTCTTCACAACTGGGTGGGAGGTTGCTACTTAA
A_32_P179746	0.044343	0.000707	4.52053	-0.21934	0.680207	A_32_P179746		GTCACTCACTTCTTTATCCTTTCGCCAAAGGAAGCCACTTCATCTAGGATGTTCTGGACA
A_33_P3328450	0.078753	0.00232	-3.85169	-1.36362	-1.1316	A_33_P3328450	NM_018942	AACAAAGGAAAACTACGAACCGGCTGTCCAAGGCTGAGCGGTGACTGTCCCCACAGACTG
A_33_P3357813	0.027628	0.000299	-5.02696	0.60923	-1.13106	A_33_P3357813	M81589	TTTTCAGAAAATTGTCCCTTTCCGGAAGGCCTCCTAGTCTTATTCGATGAGGTAAAGAAA
A_33_P3420224	0.052519	0.00102	-4.30814	-0.57722	-1.13079	A_33_P3420224	NM_001033113	CACTTGGAGGGTGAGACTGCAGTGGGGGTTGTTTTTATTAAAAGCATCATGGACACAGCA
A_23_P98402	0.310211	0.0446	-2.24302	-4.16315	-1.13057	A_23_P98402	NM_001040455	TCTTTTCTCAGAGCGTCTCCATGCTATGGTTGCATTTCCGTTTTCTATGAATGAATTTGC
A_23_P60166	0.146521	0.00808	-3.17137	-2.56243	-1.13023	A_23_P60166	NM_022783	GGGGGTAGTTAGGGAGAGACTACATGAAATGGTGTGCCCCTATTTTCTTTCTGATCCTAA
A_33_P3215367	0.272281	0.0325	-2.41833	-3.87159	-1.12817	A_33_P3215367	AK126800	TTGAACTGAGCAGGCTTTAGCCAGAGCAAAAGATATTTGAAGAGAAAAAGGAGTAATTTG
A_33_P3452287	0.145869	0.00801	-3.17639	-2.55355	-1.12751	A_33_P3452287	XR_109684	AAATTATTACCAGGAGGGATAAAACTCCAGGGTGAGCCATTAAAGAATCTGAATTCAATT
A_33_P3329622	0.272044	0.0324	-2.42016	-3.86851	-1.12738	A_33_P3329622	BC143891	AACAACAAGCAGTCACAGGGGCTCGGAGCTGGAGAGTGACACACTCAGCTTTGCCACATG
A_33_P3263614	0.121594	0.00541	-3.38798	-2.17924	-1.12644	A_33_P3263614	NM_001143778	AACAACATTGTCTCTTTCCCCCTGGACAGTCTGATGAAGGGGCAGCTGAGGGACGGTCGA
A_33_P3332871	0.281536	0.0349	-2.37917	-3.93736	-1.12607	A_33_P3332871	BE616696	TTTGTTCCTCCTCTGCAAAGCAAAGGTGCCACAGGGCGCGGCTTTCCGAGAAAGCGTACT
A_33_P3298043	0.263859	0.0298	-2.4649	-3.79294	-1.1249	A_33_P3298043	NM_001079528	CTGGAACCAGGCAATGGTGGGGGGAGGCAGGGGACAGGCTGGAACCTGGTGAAGTCTTAA
A_23_P207811	0.044609	0.000727	-4.50469	-0.24583	-0.570765	A_23_P207811	NM_006451	TTGGTACATCTGTGTCTGCTAATACAGTTAGCTTTCTCACTTTTCTGCTTGTTTGTTCAG
A_23_P11372	0.044897	0.000733	-4.49994	-0.25378	-0.911999	A_23_P11372	NM_000194	AAAGTAAGAAGCAGTCAATTTTCACATCAAAGACAGCATCTAAGAAGTTTTGTTCTGTCC
A_24_P401174	0.049458	0.000932	-4.36206	-0.48583	-1.12485	A_24_P401174	NM_015202	AGAAGTCGAGTTCTTTGACTTGAATGACACAAAGCTTTATGTGTCGCCCCACGATGTGGA
A_33_P3329444	0.132974	0.00659	-3.28178	-2.36712	-1.12471	A_33_P3329444	NM_182574	TATGGTTGGGGGGCTTCTTTTGCTGCTGGCCACGGCAAACAAGCTGCTTGCTGCTTCCTT
A_33_P3479449	0.220964	0.0198	-2.68653	-3.41309	-1.12443	A_33_P3479449	AK055877	ATTAGAAAGCAGAGCAGGTCTCAAGATTCAATGAAACAATTGCCTGGAAGCTGGAAGATA
A_33_P3388453	0.178344	0.012	-2.95963	-2.93602	-1.12439	A_33_P3388453	NM_001029861	TTCGACATGTGGAAGGACTACTTCAACCTGAGCCAGGTGGTGTGGGCGCTGATCGCAAGT
A_23_P44849	0.300159	0.0409	-2.29156	-4.0832	-1.12409	A_23_P44849	NM_178863	GCACAACCGCAGTAACAACAAGTACTCCTACACCAGCACTTCAGATGACAACCTACTTAA
A_33_P3629131	0.123011	0.0055	-3.37911	-2.19493	-1.12345	A_33_P3629131	BX484257	TCTTCATAGTGTCCTTTAGCAAGCACCTCTGCCCCCTATAAAGCAGCTGTCATATCTAGA
A_33_P3293432	0.045152	0.000747	4.48854	-0.27288	0.909608	A_33_P3293432	NM_199340	CAAGATAGAATGGGATACGGACCAATGGAAGACTGAGAACTACATTAATGAGAGCACAGA
A_33_P3316934	0.112245	0.00468	-3.46719	-2.03924	-1.12344	A_33_P3316934	AK310032	AGGAGCGTTCTAATTGCCGATTTCCCGGCGGCACAGAGAGGCTAATTCTGCGCGGGGGCT
A_23_P13455	0.162293	0.00989	-3.0625	-2.75477	-1.12308	A_23_P13455	NM_001004749	GCCCCTTATGAACCCCATTGTGTACTGTGTAAAGACTCGACAAATCTGGGAGAAGATCTT
A_33_P3349651	0.045238	0.000752	4.48535	-0.27821	0.842004	A_33_P3349651	NM_015055	GAGTGCTTGTCATCAGGTGTTTTCCTTAATAAGTAGGGATATGATCATTTACAGGAATTA
A_23_P93141	0.270328	0.0316	-2.4326	-3.84753	-1.12188	A_23_P93141	NM_153699	CTGACATTCACCTGGTGGAACTTTTCTACTACGTGGAAGAGCTTGACTCGAGTCTTATCT
A_33_P3369029	0.195291	0.0143	-2.86221	-3.10702	-1.11933	A_33_P3369029	NR_033579	AATGGATGTGGGACCAGTGCACACAGATGCCACCCTACAAGTGACCATTGCCCTAGAGGG
A_23_P114689	0.194197	0.0142	-2.8688	-3.09549	-1.11907	A_23_P114689	NM_017707	CAATGAGAAAGCAGATACACCTAAGCCATCATCAACCACTAACATCTCAACTTGCCAGTT
A_33_P3403254	0.318542	0.0482	-2.20031	-4.23294	-1.11898	A_33_P3403254	NM_001080404	GTGTAAGCAATGTGGAAAAGCCTTCATTTCTTCTAATTCTATTCGCTATCATAAAAGGAC
A_23_P34045	0.142146	0.0076	-3.2046	-2.50366	-1.11852	A_23_P34045	NM_001399	TGATTTTTGTCTTTTAATCCATTTCAGGACTCTCTCCAGGAGGGCTCGGGGTGTGTCATT
A_33_P3225562	0.311682	0.0452	-2.23543	-4.17558	-1.11804	A_33_P3225562	NR_040249	TTCATGTTGTCCCTTTTTGTGTGTGCTCTGATTTTGACCAAAATGTAGTCTAAAATCCTT
A_33_P3273272	0.095426	0.00336	-3.6468	-1.72259	-1.11754	A_33_P3273272	NM_001172655	ATGGCCATGAAGCACTCATGACAAAAACCAAAAAGTTGATGAGTAGTACAGAGCGACATG
A_33_P3259943	0.198704	0.0151	-2.83397	-3.15645	-1.11679	A_33_P3259943		TGTGTTGACCGTATCTCCAAATAGACAATAACGAGGCATCTTGATTCCCACAACTCCAGC
A_33_P3351791	0.318086	0.0478	-2.20447	-4.22617	-1.11644	A_33_P3351791		AACAAAGCCTTCACGATTTGTCCTGTCCTTGGAAGCTAAATCTGAGCCTGCTCAGCAATT
A_23_P412577	0.198704	0.0152	-2.82912	-3.16492	-1.1152	A_23_P412577	NM_173505	TAAACCACGAGAAATATATAGGCTTGTCTCTTTGGTCTTTTATTTTGGCTCTATTGTTGG
A_23_P45976	0.046612	0.000792	-4.45563	-0.32808	-0.768171	A_23_P45976	NM_002885	CCAAGTCGGAGAACTCATCCACTCAGAGCTCCCCAGAGATGCCCACGACCAAGAACAGAG
A_33_P3362503	0.140494	0.00738	-3.21994	-2.47652	-1.11515	A_33_P3362503	NM_001101426	CAGAGCAAGTGAAATGCCCCAAGCTTTTCTATTTGATGTGATTTATGAAGCATATCAGCA
A_23_P65262	0.046612	0.000793	4.45466	-0.32972	0.956788	A_23_P65262	NM_033111	AGCCAAGACTTAACAAGCACTGACTACCGTTCCCTTGAGCTACCATTATCACAAGGGTTT
A_33_P3346638	0.157946	0.0093	-3.09538	-2.69672	-1.11489	A_33_P3346638		AATATGGATATGGACCTCACCATACCTACAGAAGTCACTATGGAGGTTGAACCTTCCCCA
A_32_P377008	0.269271	0.0312	-2.44069	-3.83388	-1.11451	A_32_P377008	XR_132685	TGGCGAGAGAAGATAATGACCCAAATAGAGATGAGGTCCCAAGGGCCCAACTTCCCACAC
A_23_P2041	0.218779	0.0193	-2.70085	-3.38826	-1.11421	A_23_P2041	NM_032867	AGCAAATAACTCATATAGCAGGTGTTAATTCAATCCAGGGTGAATTTAATTTACCAGGTG
A_33_P3334625	0.046732	0.0008	-4.44973	-0.338	-0.811065	A_33_P3334625	AK123321	GGCTCAACGTCATAGAGATGCTGGAGAAATGCCAATCAACAGAACCTCTGCAAATCTATT
A_33_P3381996	0.231094	0.0219	-2.63201	-3.50726	-1.11399	A_33_P3381996	XR_113107	GACTTTTACATTGCTCCTCCAGATAGCAGTGGCAGTGGCATTTGCAAAAAGGCTATTTGA
A_33_P3279362	0.208353	0.0174	-2.75862	-3.28792	-1.11397	A_33_P3279362	NR_027021	GAAAAATGCAGATAAGAAAATTAAAACCACAGACTCCTGGGCAGCGAACAAGAGCCTTCT
A_33_P3319982	0.076723	0.0022	-3.87957	-1.31501	-1.1131	A_33_P3319982	BC015443	CCACCTGAAATGTGCCCATCGAGTCCTGGCACCTTTTACCATTTCTTCACAATGAAAAAA
A_33_P3243332	0.198704	0.0153	-2.82879	-3.16551	-1.11218	A_33_P3243332	NM_152432	AGTGGATGGCAGTATCTTCATGGTATCCATGGTAACGAATAAATGCTATGATTTTATCTG
A_33_P3420053	0.067664	0.0017	-4.02218	-1.06744	-1.11204	A_33_P3420053	NM_001136038	AGAGAAATCATATACACCTAACTGTGTGGCAGAGGCTTCATTTAGGTCTCACAACTCACT
A_33_P3278191	0.271573	0.0322	-2.42355	-3.8628	-1.11188	A_33_P3278191		AAACACCAAAAGGATAAGCACAAGCAGCACAAAAAACACAAGGAAAAGGCTGTGGCTGCA
A_33_P3413404	0.290306	0.0374	-2.34133	-4.00058	-1.1118	A_33_P3413404	AK309987	TGTTCAGATTGCTTGTGATGAGGGCCTTCGGAGATGCCGCAGGTTCTGAGTAGAGGACGC
A_33_P3367681	0.271573	0.0322	-2.42346	-3.86295	-1.11116	A_33_P3367681		TCATTCATTCATTCCACAAACTTTCGTGGTGATTTTTGCCCGCTTTGAGTATGGGCGGGA
A_33_P3245006	0.047144	0.000819	-4.43594	-0.36119	-0.720357	A_33_P3245006	NM_015533	TTCATCTTGGATGTCTATAGCCTCCAGAACTGTGAGAAATAAACACTTGTTGTTTAAGCC
A_33_P3212402	0.310776	0.0448	-2.24033	-4.16756	-1.11111	A_33_P3212402	AK128010	AGCAGGGGACCTGGAGCTACTCGCAAAGCTGTCACGGTTGCCATATCTTGGAGCAGTACT
A_33_P3257252	0.186029	0.013	-2.91488	-3.01467	-1.11005	A_33_P3257252	NM_138347	TGTGGGAAACCCTTTACCCACAAATCAGACCTTATTCAGCACCAAAGAGTTCACACTGGA
A_23_P167298	0.235382	0.0228	-2.61118	-3.54313	-1.10861	A_23_P167298	NM_032149	GATCAGCAAAACCAGTGTCAGCAAGGAGTATACAAGAATACAACCTCTGTCCCCAAAGAG
A_33_P3226192	0.053471	0.00106	-4.28697	-0.61319	-1.10813	A_33_P3226192	NM_016346	AAGGTATAACAGGTTCCTGCCAGTGAGAAATGGGGAGAATAAGCCAGAAAAGTACCCTAG
A_33_P3232532	0.079286	0.00236	-3.84195	-1.38061	-1.10803	A_33_P3232532	NM_025191	CCATATTAGCAGACTGGAATGAAGATATAGAAGCATTTGAAATGATGGAGAAGGATGAGC
A_24_P924816	0.310954	0.0449	-2.23927	-4.16929	-1.10779	A_24_P924816	NM_052885	TGATGTTAAAGTATCTTTTATTTGTAATAAATATTCAAATTTCTATTTAGAAGCTCTAAT
A_33_P3303717	0.141099	0.0075	-3.21185	-2.49083	-1.10692	A_33_P3303717	NM_001608	GTCTTCTATAAACCAGGCTGTTAATACAATGATGACAAACAAAACTGGCAAGATCACTAA
A_23_P55400	0.263704	0.0297	-2.46639	-3.79041	-1.1045	A_23_P55400	NM_003771	ATGTGCCTCAAGAAGAATCACGAGGAGGAAGTCAGTGTACTCCGTTGCCAACTTGGGGAC
A_33_P3421118	0.28234	0.0352	-2.37475	-3.94477	-1.10425	A_33_P3421118	AK098312	GTCCAGTTCCTGACCATGCTCTGCTGAGCTAAAGGAAAAGAGTATATTGAAACTGTTGCT
A_33_P3354574	0.24184	0.0242	-2.57957	-3.59744	-1.10374	A_33_P3354574		AAGAAAAGCAAATAAGCAGACCAAAGAACTGTTTGCATTTGCCCCAGATGCTCCCTGGCT
A_23_P316511	0.248621	0.0258	-2.54432	-3.65779	-1.10323	A_23_P316511	NM_002146	ACATTTTAAAAACCAGACAAGATGGCTAGGCCATCACCAACCAACGGACTTACCTTACAT
A_32_P42054	0.047309	0.000839	4.42235	-0.38406	0.657232	A_32_P42054	NM_194249	GTTTTGGTTTCTGTATAGTTTTGGGTCTTTCTATGCTGGTTGTATTTATGTTAAACCCCT
A_24_P26177	0.047309	0.000842	-4.42	-0.38801	-0.563695	A_24_P26177	NM_014703	AAACCTATAGCAACCATTGATGTGAAACGGAACATCTTTGACCTGTGTACAGACACCAAA
A_33_P3232980	0.047309	0.000844	-4.41878	-0.39008	-0.758525	A_33_P3232980	NM_031417	GCCTCTGGGTGTGGAGCTGGGATCTTCAACTGGGGACAGTACAGTAAAGAACATCACAGC
A_23_P17345	0.047309	0.000845	4.41795	-0.39148	0.960592	A_23_P17345	NM_005461	ATTTTTAAGTTCCCATTTGAAATTGCTGGCGCTGCTGGCCGGATGCATTTTTGAGTTTGT
A_23_P127013	0.227486	0.0211	-2.65264	-3.47167	-1.10223	A_23_P127013	NM_030756	TTAAAGTCTTTGTAGCGTTTAAAAAATATATATATATACATAACTGTTATGTAGTTCGGA
A_23_P11032	0.047309	0.000846	4.41768	-0.39193	0.771475	A_23_P11032	NM_032591	CGACCTGACATTGACCTACGGGGACAGCACAGTGACTGCAAATGGCTCCTCAAGTTCGCA
A_32_P190416	0.047309	0.000847	-4.41682	-0.39338	-0.837193	A_32_P190416	NM_003980	TATAGGCAGATTACCAGTTTCTTATAAATACAAACTTGTACATGGACATTCTGCAAACCC
A_33_P3342780	0.178885	0.012	-2.95706	-2.94054	-1.10102	A_33_P3342780	NM_139026	TCATTACCGAGGACACTGGCTTCGACCTGGGAGTCACCATTGCCCATGAGATTGGGCACA
A_33_P3278362	0.227486	0.0211	-2.65232	-3.47222	-1.09983	A_33_P3278362	NM_020349	AGCTAACTGAGGGCCCAGCCTTTTTTCTGCATGATCCAGGAGCACATACCACAAACTACC
A_24_P673063	0.054319	0.0011	-4.26732	-0.64664	-1.09969	A_24_P673063	NM_001444	GAAGAAAACACAGCTGATGGCAGAAGAACTCAGACTGTTTGCAACTTTACAGATGGTGCA
A_23_P106933	0.26785	0.0308	-2.44688	-3.82342	-1.09822	A_23_P106933	NM_052956	TTTGTCTCAGAGCTGCCAAAAACCATCACTGGCAAGATTGAACGGAAGGAACTTCGGAAA
A_33_P3366179	0.24681	0.0253	-2.55371	-3.64173	-1.09791	A_33_P3366179		TCAAACTTGGGAGCTGCCCGGTGACCATGAAAACCAGGCAGAGAAGAAACAGGGAGCCTG
A_23_P105862	0.166324	0.0104	-3.03299	-2.80682	-1.09711	A_23_P105862	NM_023037	ATATGTAAAGGGCCATTCTTAAGTTCTCTCCTTAAACTTAATGCTGTCAAGTGTTAGATG
A_33_P3408722	0.169713	0.0109	-3.01018	-2.84702	-1.09696	A_33_P3408722	NM_001184941	AAAGGCTACTCCTCACTTGACCAGAGCCCTGATGAGAAGCCACTGGTAGCCCTTGACACG
A_23_P101774	0.253335	0.0268	-2.52409	-3.69233	-1.09623	A_23_P101774	NM_000453	GCAGACAGCATCAGTGGCCCCCAAGGAAGAAGTGGCCATCCTGGATGACAACTTGGTCAA
A_24_P90216	0.208068	0.0172	-2.76258	-3.28103	-1.09586	A_24_P90216	NM_018490	AATGTGGCTTCTGTTCATTTCGTTTAATTAAAGCTACCTCCTAAACTATAGTGGCTGCCA
A_33_P3354256	0.198704	0.0151	-2.83316	-3.15786	-1.09584	A_33_P3354256	NM_014751	CTCGGAATATAGCTCTTTTGAAAGTACTCGACACCTTTAGATAAGAATTAAAACCAACCT
A_33_P3262083	0.044553	0.000724	-4.50656	-0.24269	-1.09482	A_33_P3262083	NR_015384	ATTAACTTGTCACTGCATCTCCGAAGTGAGGAGGCCCCTTTGGAAGAGACAGAGGCGGCG
A_33_P3314559	0.302664	0.0418	-2.27921	-4.1036	-1.0948	A_33_P3314559	NM_138453	TGCGGTCCTAGCCAGAGAGAAAGGACATTTGCCAACAATGAGACACGAAGCGCCCATGCA
A_23_P370479	0.048314	0.000885	-4.39154	-0.43601	-0.816461	A_23_P370479	NM_015352	TTCACTATTGTTATTTGAAAAAATATTTTTATTTGTAAGAGTTTTTCTTTATTTAAAATG
A_33_P3413895	0.296592	0.04	-2.30394	-4.0627	-1.09351	A_33_P3413895	NR_003261	TTATTCTCCTGATCTTGGTTTATCTGTGTGCAGGAGGTGCCGGAGAGCATTAAAAGAAGG
A_24_P41864	0.057726	0.00123	-4.20644	-0.75053	-1.09318	A_24_P41864	NM_006125	CATGCCGATGACAACATCAGCAAAGATGGGCAAGAGGTCACTGGGAATAAAATGACATCT
A_33_P3287939	0.180923	0.0123	-2.94614	-2.95975	-1.0931	A_33_P3287939	NM_199136	AGCCCATTCCTAAAAGCATTTCAAGCATCATCTAGTTCTTCTCCAGAAACGTTAACAGAT
A_24_P156635	0.268631	0.031	-2.44306	-3.82988	-1.09192	A_24_P156635	NM_032126	ATGGACATTTTAATAAATACACAGAAGAACTATAAGCTTCCCCTTAGAAGAGCACCAAAG
A_24_P208345	0.048563	0.000896	-4.38453	-0.44784	-0.569947	A_24_P208345	NM_033102	GTGCCGTTTGCAATAATGTCGTCTTATTTATTTAGCGGGGTGAATATTTTATACTGTAAG
A_33_P3402931	0.23817	0.0233	-2.59931	-3.56355	-1.09129	A_33_P3402931	NM_001024613	TTTCTGCAGGAACTTTGACCTCAAGAAGCATGTCCGCAAGCTGCACGACAGCAGCCTGGG
A_33_P3266195	0.303971	0.0422	-2.27423	-4.11181	-1.09079	A_33_P3266195		CTAGTAGCAGGGGTGGCAGGCTGGTTAAAAAAGAAATCCAGGTCTGCCATGGAGGAGGCA
A_33_P3292660	0.290397	0.0375	-2.33884	-4.00472	-1.09058	A_33_P3292660	BC032004	GACAGCTCTGCCGTGCTGCAAAGATCATGGGCTGCTGCACCTAAAATGTTCACCAGGTGG
A_33_P3404546	0.155474	0.00905	-3.11036	-2.67026	-1.08985	A_33_P3404546	NM_001098623	AGCCTCAGCCAGGAGAAGGTGCTGCCCTCAGACAAGTTCAAGGACTACCTAGAGACCATG
A_23_P73526	0.048662	0.000904	-4.37958	-0.4562	-0.743181	A_23_P73526	NM_004143	CAAGGCTCTGAAATGCCAACAACGTCGAGGCCTGCACTTGATGTCAAGGGTGGCACCTCA
A_32_P167904	0.047106	0.000809	-4.44322	-0.34894	-1.08973	A_32_P167904	NM_138286	CTACAGTATACTTATGCCACAATGTACGTTTCCATGCAAAATCTTCTATTTGTAAGTGTG
A_33_P3352941	0.020782	0.000176	-5.34859	1.11565	-1.0891	A_33_P3352941	NR_003136	GAAAAAACTTTCTAAATGCATCAGCCTCAACATTCCCCTTGGCTCTGTAATACTGAAAGC
A_33_P3209457	0.163978	0.0101	-3.05097	-2.7751	-1.08835	A_33_P3209457		CTGCAGAGAAGCCAAAAATTATGCCCAAGTACATCTGAAATAAACTAGATATCAACAACA
A_33_P3239659	0.314404	0.0462	-2.22314	-4.19569	-1.08783	A_33_P3239659		TTATTCACTTTTGCCCTGATTGCCATTACTCTGAACCAATGTGGATCAATGACCTGCCCA
A_23_P16743	0.049024	0.000918	-4.37088	-0.47091	-0.760954	A_23_P16743	NM_002410	TTTAAATCAGAAGATTGAGCCATACATGCCATATGAATTTACGTGCGAGGGGATGCTACA
A_33_P3388948	0.049144	0.000922	-4.36859	-0.47477	-0.62326	A_33_P3388948	NM_001012994	GTTGACTTTTTGATGCTGGCACGAGGTTTTTGTCCACTTTTTTCATATATCTGTGTATAA
A_24_P34534	0.162228	0.00985	-3.06457	-2.75111	-1.08662	A_24_P34534	NM_152526	CGGAGGGAAGGTTTCCCTTTATATGAAGACGACGAAGGAAGAGCAAGGCCATCCGAGTAT
A_33_P3343106	0.049304	0.000928	-4.36496	-0.48092	-0.787406	A_33_P3343106	NM_014209	TATCCGGACTGTGCGGGAGGCGGACGGGGAGCAGAGACACAATAAAAATTCCCGGTCAAA
A_32_P99311	0.307585	0.0435	-2.25758	-4.13923	-1.0858	A_32_P99311	NM_181756	CACAACAGAGAAACCCTATAAAGAATGATACAATATGTTTCAATCAGAACCTTCACATCC
A_33_P3320112	0.132583	0.00654	-3.28535	-2.3608	-1.08572	A_33_P3320112		ACGTTGGAAGTTAGCAAAGTGCTCCTACAGCCGCATCTGCAGTTAACATAGTATCCCTAT
A_23_P139740	0.209662	0.0177	-2.74969	-3.30346	-1.08571	A_23_P139740	NM_019854	GTGCCGTCCCAAAGAATACCGTTTGCAGGACTACACACTTGAAAACCAGAGTTTTCAACT
A_23_P67198	0.317513	0.0476	-2.20678	-4.2224	-1.08556	A_23_P67198	NM_015692	CATTCATACCCACACACCCAGCTTGTGCCTGTGGTTAACATCTCAGAAAACTCTGGTAAA
A_23_P130352	0.257555	0.0278	-2.50305	-3.72817	-1.08395	A_23_P130352	NM_198991	TTGATGGTACAGAGCCCATTGTTTTGGACAGTCTCAAACAGCACTATTTCATTGACAGAG
A_24_P13715	0.18901	0.0134	-2.90013	-3.04054	-1.08342	A_24_P13715	NM_147188	TTCTCCCTTAATAAAGGAGAAAAATATACTGATGGCTGGAGAAATTTTTCTCTGCCTTTC
A_33_P3337584	0.312487	0.0456	-2.23042	-4.18378	-1.08212	A_33_P3337584	AK092513	ATGGAAATAAGGAAGTATGTATGCACTGGGTGAGAAGAAGGGTAGGAGGGCTATTATAAC
A_33_P3215834	0.163306	0.01	-3.05517	-2.7677	-1.08197	A_33_P3215834	NM_020777	AATGCACAACGAGAAGGAGCAGGAGATGACCAGCCCTGTGAGTCACAGTGAGGACGTCCA
A_23_P149064	0.16318	0.01	-3.056	-2.76623	-1.08177	A_23_P149064	NM_005704	GCCACGGTCCTGGAGATGATCCGCCACCACAACTTGGTGGACGTTTTCTTTGCTGCCAAA
A_33_P3489737	0.211187	0.018	-2.73896	-3.32212	-1.08112	A_33_P3489737	NM_020726	TCCTTCTTGTATCTTGAAGTTTTGTACTTGGGATTTCTGGACTGATAAATGAATCATCAC
A_33_P3317442	0.210266	0.0178	-2.74506	-3.31151	-1.08051	A_33_P3317442	NM_024979	AAGAGGAAACTCAAGGAACATCAAGAAGCTGGAAGAAAGGAAAACAGACCCCCTAAGCCT
A_23_P122375	0.05052	0.000968	-4.34053	-0.52227	-0.944745	A_23_P122375	NM_021943	AACTGCAAATGTTTTTTGATCCGACGTACTGAAATAGGAAGTCATGCTCTTCCCACCCTC
A_33_P3439919	0.222834	0.0202	-2.67665	-3.43018	-1.07952	A_33_P3439919	DA569006	AATCTTGGACTACTCTAAAATGCACCAGAAATTACGTGGTCACACTCGTGCAGTGAAAGA
A_23_P9485	0.181133	0.0123	-2.94472	-2.96224	-1.07911	A_23_P9485	NM_000608	GTTTGGTTCCTACCTGGACGATGAGAAGAACTGGGGGCTGTCTTTCTATGCTGACAAGCC
A_32_P66364	0.238521	0.0234	-2.59811	-3.56561	-1.07898	A_32_P66364	NM_001080545	ACCCCACACTCATACAGTAGCTATGCACATCCTGGAAGTCTCCTTGACTGAACTTTAGAA
A_33_P3739870	0.201092	0.0157	-2.81351	-3.1922	-1.07887	A_33_P3739870	AK055745	GACATACAAAGGCCCAAGTCTTCCAGAACTGAAAACAGTAATAAAACCTTCATTTATCTG
A_33_P3264667	0.29486	0.0395	-2.3107	-4.05151	-1.07834	A_33_P3264667	NM_183374	TTCACGAGGACAAGGCTGCAGAGCCGGGTGATGCCCTCGACCTAATCATTCACAGTGCAA
A_23_P76374	0.146521	0.00808	-3.17117	-2.56279	-1.07716	A_23_P76374	NM_153694	GTGAAGTGCAGAATATGCTGGAAGGAGTTGGAGTTGACATTAACAAGGCTCTTCTTGCCA
A_23_P141624	0.293909	0.0391	-2.316	-4.04272	-1.07612	A_23_P141624	NM_030967	GACCTGGTTGTCAGCCAAAGTCCTACAATGTGAAAAGAGTTAGATACTATTTTACTATAA
A_23_P96369	0.251805	0.0264	-2.53142	-3.67982	-1.07538	A_23_P96369	NM_018015	GTTGAGCAGCCTATGAACCTAAAGACATACTGCAGTTTGTTCATAAATGTATTCAGTCTT
A_33_P3353330	0.052415	0.00102	-4.31142	-0.57165	-0.991783	A_33_P3353330	AK098147	AATAATGTATGTATAACACCTGGCACAGTTCCTGGCTTTCAATAAATGGTTGTCTCAGGC
A_33_P3235562	0.279401	0.0343	-2.38819	-3.92225	-1.07506	A_33_P3235562	NM_001206540	ATTGATGCTATCCCTGACAACCAAAAGTTTAAGCAGTTGCAGAGGGAGCTCTCTCAAGTG
A_23_P322395	0.190511	0.0136	-2.88969	-3.05887	-1.07388	A_23_P322395	NM_182572	GGAGTTTCATTCGCGTCCCATCTTTCAGAAGCCTTGTCCAGGTCTCCCTGTTAGCACCTG
A_23_P130343	0.198077	0.0149	-2.84064	-3.14478	-1.0736	A_23_P130343	NM_198991	AGAGACCACACCTGTATTCATATGGGAACAATTGGAATAGTGATATCCTCAAGGTGTAAA
A_23_P101905	0.311664	0.0452	-2.23623	-4.17428	-1.07339	A_23_P101905	NM_005883	TAAGGACGACACCGTCAGCTGTCCGACTCGCACACATTTAATAAACTGAGCTCTTGCATT
A_24_P7652	0.231094	0.0219	-2.63202	-3.50725	-1.07283	A_24_P7652	NM_152780	GTTTGCCAAAGCCAACGGAGCCTCCCATGAATAAACGCCTGTCTTCATCCACCGTGGCAA
A_33_P3569068	0.174401	0.0115	-2.98276	-2.89531	-1.07271	A_33_P3569068	NM_003550	TGAAGAACCAGCGGCTCAAGGAGGTTTTCCAGACCAAGATCCAGGAGTTCCGCAAGGCCT
A_33_P3416588	0.188696	0.0133	-2.90281	-3.03586	-1.07097	A_33_P3416588	NM_002930	ATTTTTCAGGTCCGCCACACCTATGAAATTCCCCTGGTGCTGGTGGGTAACAAAATTGAT
A_33_P3271166	0.285279	0.0359	-2.36262	-3.96506	-1.07015	A_33_P3271166	NM_001005490	GTTGCCCCCATGTTGAATCCCTTTATTTATACACTGAGAAACAAACAAGTAAAAGATGTT
A_33_P3415430	0.053274	0.00105	-4.29455	-0.60031	-0.841942	A_33_P3415430	NM_005346	GTTTCGTTCCCTTTAAATGAATCAACACTGCCACCTTCTGTACGAGTTTGTTTGTTTTTT
A_33_P3371185	0.155243	0.00903	-3.11143	-2.66836	-1.07006	A_33_P3371185		CACTGGGCGAGGTTGAAAAAGACCTTTTTAATCTATAAGTCGGTTTTTGAAAATTCAAGT
A_24_P265506	0.292978	0.0387	-2.32235	-4.03217	-1.06983	A_24_P265506	NM_002529	AGAACCCACAATACTTCAGTGATGCCTGTGTTCACCACATCAAGCGCCGGGACATCGTGC
A_23_P105524	0.029092	0.000326	-4.97377	0.52395	-1.06942	A_23_P105524	NM_033123	AAGGTTTAATAGCAGGAAATGAATTTCTTGGGCAATATACTTTGCCACTTCTATGCATGA
A_33_P3343316	0.244048	0.0248	-2.56465	-3.623	-1.0687	A_33_P3343316	NM_031469	CCCAAATGCCTGAGACTGCTTGAAAGATATATTTTAAGTGGTGCACTAATTAGTGAATAT
A_23_P399897	0.165884	0.0104	-3.03687	-2.79998	-1.06634	A_23_P399897	NM_178554	TATGTCATGGTGCTGGAGAATGCCAACCACAATTTCTACTCCTACATCCTGAAATACAAA
A_33_P3302373	0.197971	0.0149	-2.84171	-3.14291	-1.06626	A_33_P3302373	NM_015284	GTCCTTCTCCGCAACCTGTAACCTGCTAAATTCTCACCTTTAAAAATTGTCCTGACCTTT
A_33_P3232504	0.20841	0.0174	-2.75767	-3.28957	-1.06611	A_33_P3232504	NM_199001	GGCTGGAGAGGGACACCCCTGATTACCTTAAGGCCCAGGCAATAAAGCAGGGTGATCTTC
A_33_P3408222	0.310157	0.0446	-2.24326	-4.16276	-1.06459	A_33_P3408222		TTCTTAAAGCCCCGGGATCAAAATACAGAACTTAAGAGATGGCTCAGAGATGCCTTGTGA
A_24_P399009	0.053636	0.00107	-4.28356	-0.619	-0.788175	A_24_P399009	NM_014329	AGTCCCTCCATGTGTCTCAAGGAGTCTGGAGCCTATGGCAGGCCAACTGAGCAACTCAGT
A_33_P3773374	0.300481	0.041	-2.28974	-4.08621	-1.06425	A_33_P3773374	AK090892	CCTTTTGTGATGTAGTGTGGTTCTCATTTTAAACCTTGGAAGGTGAAAATGTACAAACTA
A_23_P356694	0.207083	0.017	-2.7696	-3.26879	-1.06416	A_23_P356694	NM_153324	CCATGAAAATGCAGATGAAGCTCCCAGTGGATTCCCACACTCTATCAATAAACACCTCTG
A_33_P3412658	0.291399	0.0381	-2.33072	-4.01825	-1.06311	A_33_P3412658	NR_045118	TGTGATGGGAGGGAAGACTTCTTTCCCAGTGCACAAATAAAAAACATGGAACGAAACTGA
A_33_P3322949	0.10291	0.00395	-3.55865	-1.87782	-1.06269	A_33_P3322949	NR_027151	ACTGATTCCTACCAACGATATCCAAATCTTAGCATGAGCAGCACGATAAACAGAATGAGC
A_23_P206661	0.203094	0.016	-2.80232	-3.21175	-1.06211	A_23_P206661	NM_000903	GTTTATATACAGTACACAGATACCTTGAAAGGAAGAGCTAATAAATCTCTTCTTTGCTGC
A_33_P3382041	0.229777	0.0217	-2.63736	-3.49804	-1.06184	A_33_P3382041		TACGATCTTTTATCAAAAATAAAGGGAGATTACTTCCAGTACCTTTGTTGCACGTGGTGA
A_23_P30283	0.054173	0.00109	-4.27144	-0.63963	-0.601955	A_23_P30283	NM_198507	ACTGAAAGGTATTTCCCATTTTTGTGGGGAAAAGAAGCCAAATTTATTACTTTGTGTTGG
A_24_P42436	0.135495	0.00692	-3.25502	-2.41447	-1.06113	A_24_P42436	NM_014715	GATGGAATCTATCGCCTTTCTGGTGTTGCCTCCAATATCCAGAGACTACGCCATGAATTT
A_23_P216556	0.172528	0.0112	-2.99556	-2.87277	-1.06112	A_23_P216556	NM_018424	TGTGCCAAAGCATTCTGTAGAGTAGGATGAGATGGTTGTTGCCCTAGTCTGTTGGTAGAA
A_33_P3214204	0.274441	0.033	-2.40967	-3.88616	-1.05872	A_33_P3214204	CA848822	ACAACTGTATTGTTCAGATTTAGGAGACAACCTAAGAAGATGATTCTGAGTAGGTAGGAT
A_33_P3344861	0.291399	0.0381	-2.33046	-4.01868	-1.05757	A_33_P3344861	XR_108709	GTTGGAGGGCTCACACTTTCTGGTTTCAAAACTACAGTAATTAAAAAGCTACAGTAATTA
A_23_P26511	0.318599	0.0482	-2.20007	-4.23332	-1.05751	A_23_P26511	NM_024307	CGTAGAGATCAAAGGGAAGAACGAAGAGCTCATCCGTGAGATAGCAGGCTTGGTGAGACG
A_23_P145024	0.309315	0.0439	-2.25152	-4.14918	-1.05636	A_23_P145024	NM_000024	CTCTTATTTGCTCACACGGGGTATTTTAGGCAGGGATTTGAGGAGCAGCTTCAGTTGTTT
A_33_P3345549	0.263859	0.0298	-2.46509	-3.79261	-1.05613	A_33_P3345549	NM_024884	GTTGTTGTTGTTGATGTTGTTAATTGCTTGTATTTTCTGCTTATGGGAAGGATCTCACAT
A_33_P3238479	0.225846	0.0208	-2.6606	-3.45793	-1.05598	A_33_P3238479		TGTTTTAAGATGGTTTACAAGGAAGGAGTACGCTCAGTAGGAGAAGATAAAATACGTGAA
A_23_P88602	0.100479	0.00375	-3.58772	-1.82658	-1.05592	A_23_P88602	NM_170677	AAAGTTATTAATGGTCATTGAACCATAACTAGGACTTTATCAGAAACTCAAAGCTTGGGG
A_33_P3258008	0.206183	0.0166	-2.784	-3.24371	-1.05554	A_33_P3258008	NM_183415	TCGAACCATGGTTACCAAGGAGAAGGAGAAACTGGGGCTGGTGGAAACCAGCTCTGCCTC
A_33_P3396326	0.261921	0.0292	-2.47724	-3.77202	-1.05473	A_33_P3396326		AGAAAACCAAGAAATAGGACTGGTAAAGGGTGCTGACCAGGTCCCTGGAGCTGCACCCCG
A_33_P3243454	0.055682	0.00114	-4.24678	-0.68164	-0.933275	A_33_P3243454	NM_207393	TTGAACTTCGGAGAGAAGCAACTTGACTTCAGAGGGATGGCTCAATGACATAGCTTTGGA
A_33_P3367396	0.308854	0.0438	-2.25277	-4.14714	-1.05455	A_33_P3367396	NM_207468	TCCTTGGCCATTGATTACCATGGCAACAACACCAGAGGTAGCACTTCTGAGCCAGATCTG
A_23_P408167	0.040123	0.000575	-4.64033	-0.02006	-1.05424	A_23_P408167	NM_001004051	GTGGATGCCAAATGAATATCAAAACTGAAAACACATTTGTTGATATTTGTCTTGCTGTCC
A_33_P3380582	0.274998	0.0332	-2.40642	-3.89163	-1.05269	A_33_P3380582	BC032956	GGTCAGGCTGGGGGGCTCATGATCAGGCATATCTACCTCTGGGAGAAAAATGACAAATAG
A_33_P3303102	0.120411	0.00527	-3.40214	-2.15421	-1.05257	A_33_P3303102	AK092022	TAAAAAATCCCCTATGGCAGAGATCCGAGTACACATGCAGCAGTTTCCACCGGTGGGGCC
A_33_P3259587	0.198353	0.015	-2.83947	-3.14683	-1.05233	A_33_P3259587	NR_003654	AGAACAGTTCCCGACTGTCCTTCTCCAGGAGATCCAGATCTGGGTCAGACAGCAGCATCC
A_33_P3228510	0.160533	0.00958	-3.07943	-2.72488	-1.0499	A_33_P3228510	NM_177996	TCGCCCCTAACCAGACCCGGGAGCTGGAGGAGAGGATCATGGAGCTGCATAAGACATATA
A_23_P164436	0.267991	0.0309	-2.44644	-3.82417	-1.04789	A_23_P164436	NM_000049	TTGTGCCTTATTCAACTGCATACATAGCTCCTAGCACAGTGCCTTATTCGGTAGGCATCT
A_33_P3350728	0.14873	0.00831	-3.15644	-2.58882	-1.04722	A_33_P3350728	NM_014808	CACAAAAGGCAGTCATCAACGAATCGGGGACATCCTGCTCAGGAACATGCGCCAGTTAAA
A_33_P3211198	0.167469	0.0106	-3.02528	-2.8204	-1.04698	A_33_P3211198	NM_001010980	GCAGATGCTGCCTTATTTGGCCACTGAAACAATCAAAGCTAATAAATGCTTAAAGAAAAA
A_23_P65041	0.276523	0.0335	-2.40073	-3.9012	-1.04561	A_23_P65041	NR_026583	TACTGGAGTCAGTTCTCAATAGTGGAGCAGAAGAACATTGACCCCCTACATGTCACTGAA
A_33_P3327673	0.122076	0.00545	-3.38442	-2.18555	-1.04555	A_33_P3327673	NM_015198	TCTCTTGGGTCACAGATTGATTTACAGAAGAAGAAGCGGCGAGCGCCAGCTCCCCCTCCA
A_23_P18152	0.299535	0.0407	-2.29383	-4.07944	-1.04503	A_23_P18152	NM_001001331	TCACCCAAGCAGCAACGAGCAACAATCGGAAACCAAATACTGGAGAGAAAACCAACGTTT
A_33_P3555477	0.118565	0.00513	-3.41723	-2.12753	-1.04498	A_33_P3555477	BC038368	CCGCGTTCAAAGTTAAAAACTGTCACCTGAATAGTTAATAACATCAAAGATTGTGAAAGC
A_33_P3393971	0.141971	0.00756	-3.20736	-2.49878	-1.04278	A_33_P3393971	NM_000299	AACATGCTGGGAACCTTAGCTGGGGCCAACAGCCTCAGGAACTTCACCTCCCGATTCTAA
A_33_P3345314	0.262961	0.0296	-2.46978	-3.78467	-1.04233	A_33_P3345314	NM_199427	TGCCACTTCAAAACTGTCCATGGCATGAAAGACTTGGACCGCCATCTCAGAATCCACACG
A_33_P3344816	0.017604	0.000122	-5.57557	1.46331	-1.04194	A_33_P3344816	NM_001004301	ACAGTCCTTTTTACATCCTCTTGAATACAGCTTTTTAGTACAAGGGGTCTTCAAGAAGTT
A_23_P202683	0.261921	0.0291	-2.47864	-3.76965	-1.04161	A_23_P202683	NM_021924	GGCGAGGACATCGGGACGGAGGCAGACGTGGTCGTTCTCAACGCGCCCACCCTGGACGTG
A_23_P89302	0.263859	0.0298	-2.46479	-3.79312	-1.04107	A_23_P89302	NM_000727	ATGAACATTGCAGGGACAACCTGTGTTTGCCAGCTGGGTGTTCCGTGTAAATAGCCAGCC
A_33_P3617190	0.213673	0.0185	-2.72452	-3.3472	-1.04054	A_33_P3617190	AK124119	GAGATGCTGCTCTCGGGCTGACACTCCATAAAATTACCCTAAAAATGGGAGGACAAAAAA
A_33_P3414689	0.195354	0.0144	-2.86109	-3.10899	-1.0388	A_33_P3414689	AF495723	CATGTAAGGACCAGGGGGGCCTAGCTTGGGCGGTGGCTGAAGGAATACAAGTCAGAAAAT
A_33_P3282489	0.138732	0.00722	-3.23243	-2.45444	-1.03794	A_33_P3282489	NM_001097634	TGCGACAGAATGCAGTTAGAATCAGTTCATATCACCATTAAAATCATCCATTCAGAAACC
A_33_P3421084	0.073851	0.00205	-3.92018	-1.24433	-1.03747	A_33_P3421084	NR_028139	TGAAAACAGGGTCGGAAAAGGTCAGTGCCCATCAGAATCGAGCTGTCGGCAAAAAGCTGG
A_24_P239606	0.057579	0.00122	4.20937	-0.74552	0.999167	A_24_P239606	NM_015675	TGAGAGCGAGATGGGAAGCATAGATATCTATATTTTTATTTCTACTATGAGGGCCTTGTA
A_33_P3370310	0.20684	0.017	-2.77108	-3.26622	-1.03713	A_33_P3370310	NM_001171796	TACCCTAGAGGTCATCTCCATTTCATCCAGATAAATGAGTATGCAAGGAACGTTTTTATA
A_33_P3318668	0.273093	0.0327	-2.41505	-3.87711	-1.03312	A_33_P3318668	NM_199001	GAGAGGGACACCCCTGATTACCTTAAGGCCCAGGCAATAAAGCAGGGTGATCTTCCTCCC
A_33_P3237344	0.069025	0.00179	-3.99445	-1.11544	-1.03252	A_33_P3237344		TACCCTCGACCTCTTTGACAACATTGCGCTCACCCCAGAGTGTGCCTCAATGCCATGGGA
A_23_P50735	0.057757	0.00123	-4.20476	-0.75341	-0.779564	A_23_P50735	NM_001029997	GTGAGAAATCTTACAGAAGAGAAACTGTATGAAGCAGTGGTTATCATGGTAAATTTCCTA
A_23_P58390	0.230429	0.0218	-2.63444	-3.50308	-1.03223	A_23_P58390	NM_152400	TAATACTAACTATTTAGTATACTGTCAGTACTGTACATCTGCACACTGGTGTTAATAGGG
A_23_P354217	0.215689	0.0188	-2.71504	-3.36366	-1.03213	A_23_P354217	NM_153266	TTGCCCTCCCGGACTTATCTACTCTTCACTTTCCTGATGATCCATGGGGCCCAGGCCTAG
A_23_P111361	0.263859	0.0298	-2.46518	-3.79246	-1.03164	A_23_P111361	NM_173672	AGAATTAGTTCCAACACAGAATGAAAGACCAATACATATGTGTAGAATTACTGACAGTGG
A_23_P2582	0.058243	0.00125	4.19694	-0.76679	0.739346	A_23_P2582	NM_015401	TCTGATTCCCACCCCACATAGGAATAGCCTGACTGAGGGGGAAGGGGTGGGAGAGAAGAT
A_32_P309662	0.058332	0.00125	-4.19531	-0.76957	-0.89004	A_32_P309662	NM_176881	TGAGATCAATGTGGTCGGTCTGGCTTTTTTCTTTAACCTGGGGATTGTGACTCCTCTGAT
A_23_P500985	0.144754	0.00785	-3.18666	-2.53539	-1.03161	A_23_P500985	NM_013945	CCGGTCAGCAACGGCCTGTCTCCTCAGGTGATGAGCATCTTGGGCAACCCCAGTGCGGTG
A_33_P3422968	0.142439	0.00762	-3.20319	-2.50615	-1.0312	A_33_P3422968	NM_001370	GAACCGATTTCAGTTAATGACTGCAGGAATCATTAAACGTCCAGTAAGCATAGCAAAAAA
A_33_P3405434	0.257374	0.0278	-2.50379	-3.72691	-1.03118	A_33_P3405434	AK057346	TTCAGAATCAAAGTGTTCTCTCAACTTCTTGGTCCCATTGGCCTCCAAAACCCAGGAGAA
A_33_P3278560	0.058511	0.00126	-4.19037	-0.77802	-0.956883	A_33_P3278560	NM_001010879	AACAAATGTGGGAATTCCTTTAGCCAATGCTCCAGCCTCATACATCACCAAAAATGTCAT
A_32_P160896	0.231094	0.0219	-2.63218	-3.50697	-1.0304	A_32_P160896	NM_177478	CAGGTGAAGTCTATCAAAGAACTAGGTGACCACGTGCACAACTTAGTGAAGATGGGGGCC
A_33_P3297126	0.251886	0.0265	-2.53018	-3.68194	-1.02986	A_33_P3297126	NM_145003	GATGTGAATCAGATCATCAAGGACTTGGCCTCCATGGTGTCAGAGCAAGGAGAAGCTGTT
A_33_P3346529	0.282319	0.0351	-2.37595	-3.94276	-1.02973	A_33_P3346529	NM_001004698	AGCTACTCCCAAGATCAGGGGAAGTTCCTGACTCTCTTCTACACCATCGTCATTCCCAGC
A_33_P3374010	0.315911	0.047	-2.21474	-4.20942	-1.02971	A_33_P3374010	NM_012309	ACTCGAGTCGGGCACAGAATGAACATAGAAAGGGCTTTGAAACAGCTGCTGGACAGATAA
A_33_P3418617	0.182538	0.0125	-2.93715	-2.97555	-1.02933	A_33_P3418617	NR_033579	TGTCTTTGCCAATTTCATCCAGCTGCTATCAGCGCAGTGGTGGTGACCGAGGGTGGCACA
A_33_P3231352	0.104482	0.00408	-3.54149	-1.90809	-1.02812	A_33_P3231352	AK022088	ACAAAGGGCATCATTCTAAAATATATACAGAACCATAAAAGCCCCAAATAGCCAAAGCAA
A_23_P99642	0.058702	0.00128	4.18334	-0.79006	0.851974	A_23_P99642	NM_001126106	GTAATTTATTTGTTTTGCTACATACTGTTCCAGACTTTTAAAGGGGACAATGAAGGTGAC
A_24_P126425	0.210266	0.0178	-2.74513	-3.31139	-1.02783	A_24_P126425	NM_032222	TGCAGACAGCATCAAAACCAATTGACCTCTCAGTAGCAAAGGAAATAAAGACCCTTCTGT
A_23_P78871	0.255141	0.0272	-2.51444	-3.70877	-1.0278	A_23_P78871	NM_024076	TCCAGTTTTCTCATGCGAATATGCACAGTTTTAATTCACGTTGTTACACTAGCCTGCCGA
A_23_P23947	0.058986	0.00129	4.17775	-0.79963	0.825634	A_23_P23947	NM_005204	TGACGTGATTCTAAGGCAGGAATTTGAGAGTTCACAGAAGGATCGTGTCTGCTGACTGTT
A_24_P295877	0.058986	0.00129	-4.17733	-0.80035	-0.4906	A_24_P295877	NM_014704	ACTGTCTCATGCTGACAAGATGTGACCACTGCAAACAGGTGGTCGAGATATCCAGTCTGA
A_23_P91104	0.058986	0.00129	-4.17603	-0.80258	-0.9662	A_23_P91104	NM_002246	AAATGTGAAACTTGGTGGGGTCAGGGAGGAAAGGCAGAAGCTGGGAGCCTCCCTTCCCTT
A_23_P318943	0.110273	0.00451	-3.48646	-2.00521	-1.02776	A_23_P318943	NR_038859	TCTGAACATCACAAGGAACCACGTGGGAAAACAGGACTTCGTGGCGTGCCCTGGCAGACA
A_33_P3280905	0.321427	0.0494	-2.18614	-4.25598	-1.02745	A_33_P3280905		TCATAGATTCCTTCGTTCACGACATCTTGGAGCACATCGCCACCAAGGCCGGCCACTTGG
A_23_P334883	0.059043	0.0013	-4.17405	-0.80597	-0.972969	A_23_P334883	NM_012309	CGTTCCTGTAACTTGTTCTACATTCCACAGTCTTTACCGTTTTATGTTCAAAATTACAAC
A_33_P3323887	0.190711	0.0137	-2.8873	-3.06305	-1.02738	A_33_P3323887		CTGGGCACTAGAAGCCTTGGGAAGATTTGAAAAATAAATCTTATTGGCCTCACCATTTCA
A_33_P3424153	0.25389	0.027	-2.52032	-3.69875	-1.02715	A_33_P3424153		ATCAATAATACCAAGGCAGAGATTACTCTACTTCTGCCCACTGCACTGAGAGTTCGTTGG
A_33_P3270941	0.28234	0.0352	-2.37469	-3.94487	-1.02594	A_33_P3270941	NM_207401	GCCGTCGGCATCTGTAGACTAAAAATAAACAGCATAAACAGACACAAACCAAAATAAAAT
A_23_P13442	0.164031	0.0101	-3.04973	-2.7773	-1.0254	A_23_P13442	NM_014632	GGACACGGGGATTTCCCGCAGAATAAACTGCTCTCTAAAGGCCTGTCTCATACTCATCCT
A_32_P151823	0.099413	0.00368	-3.59807	-1.80836	-1.02523	A_32_P151823	BC040619	AGGGCATGTCTTCTTATTCCATGTGACAGTGGCTGGCTGAGTTGCTAGTACGTTTTTGAA
A_33_P3315519	0.059654	0.00132	-4.16378	-0.82359	-0.707314	A_33_P3315519	NM_198461	GTAGTCCCAGGTGTTGTAAATTGCATGTTGTAATCAAACGAATGTCAAAACATAAGAAAG
A_33_P3272075	0.299277	0.0406	-2.29493	-4.07762	-1.02523	A_33_P3272075	NM_000911	TCAACCTTGAGACAGCTTCGGTTTCTAACTTGGAGCCGGACTTTCGGAGTTGGGGGTCCG
A_23_P422849	0.076753	0.00221	-3.87815	-1.31748	-1.02463	A_23_P422849	NM_152898	AACCTCAACGAGGCCTTTGACCAGCTGCGGAGGAAGGTGCCCACGTTTGCTTACGAGAAA
A_33_P3329607	0.067982	0.00173	-4.0138	-1.08193	-1.02348	A_33_P3329607	NM_030981	TTTGCAGACTCTCTGGGCATCCCCTTCTTGGAGACGAGCGCCAAGAATGCCACCAATGTC
A_23_P113237	0.059773	0.00133	-4.1597	-0.83058	-0.889002	A_23_P113237	NM_001012288	TCCTCTATGAGGTTCAGTACCGGAGCCCCTTCGACACCGAGTGGCAGTCCAAACAGGAAA
A_23_P21363	0.244953	0.025	-2.56094	-3.62937	-1.02325	A_23_P21363	NM_024060	GTGCATTTCTTTACTTGCAAGGGGACAGAGTGTGGGCTTAGGTTTGGGACTAGAGGGGGC
A_33_P3383816	0.245228	0.0251	-2.56001	-3.63095	-1.02281	A_33_P3383816	NR_024484	CCCCAGCAGCACACATAAGTTGATTTCTAATTATTCCTCTTTAAGAAATTGTTTGTGGAA
A_24_P178602	0.060672	0.00136	-4.14881	-0.84926	-0.956906	A_24_P178602	NM_198457	ATAAGATAATTCACACCGGAGAGAAACCATACAAATGTAAGGTTTGTGACAAGGCTTTTG
A_23_P402331	0.261506	0.029	-2.48111	-3.76545	-1.02244	A_23_P402331	NM_145652	TCAGCCCCATGAACCACCTGTGTCACAAGGACTCAGACTGCTCGGGCAAAAAGCGATGCT
A_23_P5211	0.075317	0.00211	-3.90462	-1.2714	-1.02097	A_23_P5211	NM_024690	AGCATCAAGAGTTATTTTTCTGACTGTCAAGTTTCAACATTCAGGTCTGTCCCCAACAGG
A_24_P606538	0.250971	0.0262	-2.53559	-3.67271	-1.02064	A_24_P606538	NR_028361	ATCCACAGACACAGTGGGTTTCCTGGAGTCGGAGTTGAAGAAGCTTCTGGGAATGCAGCA
A_23_P5301	0.235196	0.0227	-2.61267	-3.54057	-1.02044	A_23_P5301	NM_014553	GATGGTGGGCTAAATTTTAATTCTCAAAAGTGTAGGAGGCTAATATTGTCTTCTAAGTTC
A_32_P832001	0.061104	0.00138	-4.14027	-0.86392	-0.853655	A_32_P832001	AF161364	TTCTTGGAGGCCGTGATTATATCTATTTAACGCTTTTCCTTGTACCTAATAAAATGTCTG
A_33_P3220979	0.076717	0.00219	-3.88253	-1.30985	-1.02034	A_33_P3220979		CATCTTCTAATGTGGAGATAGGTGCAACTTCCAAGACACAAGCCGGCACAATACAGACAA
A_24_P366652	0.317267	0.0474	-2.20961	-4.21778	-1.01911	A_24_P366652	NM_005353	TGACAGTGGTGACACAGCTATTTCATCATAAGAATGGGGCCCGAAAAAGTGCCAAGAAGA
A_23_P433218	0.258577	0.028	-2.49867	-3.73561	-1.01854	A_23_P433218	NR_002185	GTGAATCCTCACCTCTGTGTCTTCTTAGTTTCGGTGTCCTTTTCCTTAGCCTGTTGGATT
A_33_P3236703	0.129565	0.00624	-3.31088	-2.31563	-1.01777	A_33_P3236703	NM_001244752	CATAAGAATTCCTACTTCAAACCCACAGACTTCAAATAACTGCAAGAACTCCTTGACTGA
A_33_P3355886	0.266315	0.0305	-2.45212	-3.81457	-1.01765	A_33_P3355886	AB231701	AGAGTTTAGAAGATGTAAAGGGCCTGGGGCCAGGAAGATTTCCAGAACAGCAAAAATCCA
A_33_P3385782	0.240404	0.0238	-2.58841	-3.58227	-1.01754	A_33_P3385782	NM_182633	CCTTCATTTAGCAGCACATAACTTATGGTGGGGGAAATCAGATAAATATATAAATGTAGG
A_33_P3402600	0.061172	0.00139	-4.1356	-0.87194	-0.495476	A_33_P3402600		GGTTGGAGCTTTTGGGGGGAATTATGAAGAAATCTGAATAAATTTCTCACCCTTCATGTT
A_23_P317667	0.076717	0.00219	-3.88359	-1.30801	-1.01739	A_23_P317667	NM_015259	GCCCAACGTGTACTGGATCAATAAGACGGACAACAGCCTGCTGGACCAGGCTCTGCAGAA
A_33_P3233189	0.261763	0.029	-2.48017	-3.76705	-1.01737	A_33_P3233189	NM_001144871	CATGTGGGTTTGTAATAAGTGTGCATATAAATTTCAGAGGAAGAGAAGACACAAACTCAA
A_24_P389608	0.127676	0.00603	-3.32904	-2.2835	-1.01707	A_24_P389608	NM_153256	AAGATCTCAGGGTAGGGAAAAACCAGTGAATGAGGTTACACAGCAGGAAAAGAACCGGTT
A_33_P3395688	0.251886	0.0265	-2.53019	-3.68192	-1.0169	A_33_P3395688	NM_001018100	TTGGACTATTTAACAGAAACCCAGGCCAAGACTGAAGTGGAAACCAGAGAGATAGGAGTG
A_24_P626932	0.233419	0.0224	-2.622	-3.52451	-1.01689	A_24_P626932	AF007191	CTTTGACAACACCAACAACTATCACTCACCATTCCGTCGGCTCTACTGAATCCTTGCTTA
A_33_P3229002	0.061498	0.00141	-4.12792	-0.88514	-0.671467	A_33_P3229002	NM_145272	CCTCTGACAAACCTGCCTCTTTCCCTGAAACCATTCAATAAAACCTCTGATCAAAGTGTC
A_33_P3374221	0.264364	0.0299	-2.46275	-3.79657	-1.01503	A_33_P3374221	AK127740	ATAAGTAGACACATCACGTGTTGCTCCTGCGAGTCTCCTGGGGACGTGTTACTGAGCGGC
A_23_P65532	0.276601	0.0336	-2.40044	-3.90168	-1.01385	A_23_P65532	NM_021255	AAATCCATCTCCATCCCTTTACTGTCAATCTTCTGTCCCAGTAGTTTAGCCTTTGTGGCT
A_32_P223140	0.202624	0.016	-2.80417	-3.20851	-1.01382	A_32_P223140	NM_145313	GTCCCGAGAACCACGTGGAAAAAGACAGCTGGAAGACCCTCAGGACCACCCTTCTGAACA
A_33_P3372397	0.09208	0.00318	-3.67783	-1.66805	-1.01356	A_33_P3372397	AK130111	GTGTGCTGTCACTTATCTAAGGAAAGGTGGGGGGATTTGCTCATTTTATTTTTATTTTTA
A_23_P13934	0.046612	0.00079	-4.45645	-0.32672	-1.01267	A_23_P13934	NR_026661	GATCCGGTGGAGCCAATTCACCAGCAGGTCCCGGCAGCAACTCTTCTACAACAGATTCCT
A_33_P3225278	0.102586	0.00391	-3.56454	-1.86743	-1.01266	A_33_P3225278	BC039705	GCTTCCTGGGGTCTCCTGGTCTTTGTGGGATTTCCAATGAACAGAGGCTTTTCTAGAATG
A_32_P88262	0.274719	0.033	-2.40881	-3.88761	-1.01168	A_32_P88262	NM_020949	ACCCTAGAAATCATAAACCCCCACTTTCCAAAGCAAAGATGCTGTTAATGTTATGATGGT
A_24_P48791	0.062061	0.00144	-4.1176	-0.90288	-0.627872	A_24_P48791	NM_003908	AGGAAGCTTTCCGTTTTCCTAGCCAACTTGTGTTCTGGGTTTGAAAAAGACCCACCACAA
A_24_P373174	0.270006	0.0314	-2.43696	-3.84017	-1.01117	A_24_P373174	NM_004580	ATGAAGTATTCTGTAGCCTATATTTTTCATAGAGCTCATGAGCATTTACTGTACTTGCTG
A_23_P256603	0.254644	0.0271	-2.5176	-3.70339	-1.01084	A_23_P256603	NM_001207008	CAAGCTCATGCTGGAGTGGCAGTTCCAGAAGAGACTCCAGGAGTCGAAGCAGAAGGACGA
A_33_P3268868	0.062213	0.00145	4.1141	-0.90889	0.966795	A_33_P3268868		GCTGAATGAGTTAGTGAGAATCTGGGTCTTCATATCTTTTTTAAAATTGTGGCTGCTTTT
A_33_P3349269	0.062438	0.00145	4.11073	-0.9147	0.617199	A_33_P3349269	NM_004671	TAACAGACTACTCAGTACCATTCCACCATACGCCAATATCAAGCATGTCATCAGATTTGC
A_23_P103310	0.062061	0.00144	-4.11786	-0.90243	-1.01067	A_23_P103310	NM_002963	ACGATGATGAAGGAGAACTTCCCCAACTTCCTTAGTGCCTGTGACAAAAAGGGCACAAAT
A_33_P3348629	0.076654	0.00217	-3.88682	-1.30239	-1.01041	A_33_P3348629	NM_002159	GGGACTATGGATCAAATTATCTATATGACAATTGATATCCTTAGTAATCATGGGGCATGA
A_33_P3216746	0.24275	0.0245	-2.57266	-3.60929	-1.00979	A_33_P3216746	NM_015236	AAACAGCTGCCAACATTGCTAGAGAGCTGGCTGAACAGACAAGAAATCACTTGAATGCTG
A_33_P3240538	0.062586	0.00146	-4.10723	-0.92072	-0.521852	A_33_P3240538	NM_016262	GGAGGTTTTGCTTCTTCTTTAGATAACAACTTGTTTGCCCAAAAGAATCCTAATTTGTAC
A_33_P3225273	0.088896	0.00299	-3.71078	-1.6102	-1.00895	A_33_P3225273	NM_001004128	ACATGGCTGACCTGGAATCTGCACTGCACTACATCCTGCGGATAGAAGTGGGCAGGTTCC
A_33_P3277238	0.201854	0.0158	-2.80844	-3.20106	-1.00883	A_33_P3277238		AAAGCACTTCAGAAAGAAGAAAGAACCAGGCATGGTTCTACAAAGCACAATGAACAGGAA
A_24_P136124	0.062932	0.00148	-4.10125	-0.93101	-0.975388	A_24_P136124	AF258585	AGGATTCTGGGATGAATTCTTCAATGATAAGAACCTGCTATTATTGTCCCTGCTTTACAG
A_33_P3396607	0.062932	0.00148	-4.10124	-0.93102	-0.950222	A_33_P3396607	NM_003359	CAGTTCAATGAGAAGAGGGAGACAAATATAAAGATGAGGACAGAAGCATCTCTACAGATG
A_24_P34944	0.056908	0.0012	-4.22092	-0.72578	-1.00818	A_24_P34944	NM_032094	TCGAGTCTCCAGCTAACTCTGAAACCTCAGACCTCACTCTGTACCTGGTGGTAGCGGTGG
A_23_P253958	0.263436	0.0297	-2.46751	-3.78851	-1.00789	A_23_P253958	NM_005824	GCACCACTACAATGTCCATTTTAATGGCCTGGAATGCAAAACGCCTGAAGAATACAAAGG
A_24_P931201	0.116744	0.00499	-3.43199	-2.10144	-1.00783	A_24_P931201	XR_109863	GCCCTCCACAGAGAGGAAAGACGGCAAGGAGCTTGGAAAGAAAAAGAATCCTTGAAAGCA
A_23_P59877	0.105686	0.0042	-3.52619	-1.93507	-1.00753	A_23_P59877	NM_001444	ATAACAAGAAAATTGAAAGATGGGAAATTAGTGGTGGAGTGTGTCATGAACAATGTCACC
A_33_P3482466	0.063349	0.0015	-4.09416	-0.94322	-0.788655	A_33_P3482466	AK094554	CGAATTTCTGCATTCTACCAAATGTAGCATATATGTGTGGTTGGCTTCAATAAATCTTTC
A_33_P3404844	0.112126	0.00465	-3.47064	-2.03315	-1.00752	A_33_P3404844	BC033233	TACGACCATCCTTCCTAGAGTGGGGAGTGCCAATCCTGTGGGTCTTTTTCCTTGGGGGAG
A_33_P3257030	0.123976	0.00561	-3.36828	-2.21409	-1.00741	A_33_P3257030	NM_006455	AGAGTCTAGTGGTTCCAGGGCCCTGACCAGTAGGTGCTCAATAAATGTTTGTTGTTGAAT
A_23_P68978	0.211187	0.018	-2.73965	-3.32092	-1.00724	A_23_P68978	NM_022785	CAACCTCTCTGAGGAAGAGTTCTTCCATATTCTGGAGTATTACGATAAGACGCTGTCTTC
A_33_P3243957	0.191548	0.0138	-2.88231	-3.07181	-1.00717	A_33_P3243957	AK097870	GGATCCTGAGAGACATCACGAGGGTGGGAGAGACTAAAATAGCTTTTCAAAAAGCTGAGT
A_23_P101319	0.314304	0.0462	-2.22382	-4.19458	-1.00697	A_23_P101319	NM_152354	TCAACTGCTGTATGCTACAATGGCAAAGAGGTTACTTTTGACAAATGGGTGGTTTGTGGT
A_24_P323967	0.063718	0.00152	-4.08648	-0.95645	-0.815684	A_24_P323967	NM_001145434	GGAGAGCAACCTTACAAATGTAATGAATGTGGCAAAGCATTTAGAGACTGTTCAGGCCTT
A_23_P7402	0.292936	0.0386	-2.32269	-4.0316	-1.00685	A_23_P7402	NM_178140	GTAGTTGCAAGAATATACCATGAAGATTAAAGTAGGCTGGGTTTCATTTCCATCTTCCCA
A_33_P3419632	0.17721	0.0118	-2.96614	-2.92457	-1.00602	A_33_P3419632	BC011001	CATTCCCTTCACCAGCTTGTGCACCCTATTCTGTAACTGATAATAAATGGTTGGTATTGC
A_33_P3291772	0.235308	0.0228	-2.6119	-3.5419	-1.00591	A_33_P3291772		TGTTAATAGGAGCAAAGAGAAGAAAAGGCCTGGGCAGTGCTTGGAGATAAAAGACCTGAA
A_23_P64837	0.064124	0.00154	-4.07999	-0.96764	-0.497383	A_23_P64837	NM_001031628	ATTTCATCTAATGACTCCCAGGCCCCAAGGAGCTTATTCCTGGCTCCATCGCTAACACGT
A_33_P3232627	0.224626	0.0206	-2.66543	-3.44958	-1.00563	A_33_P3232627	AB384543	TCATTGCCTTTCTTCGTAGCACCTTTGCTGTATTCACACACCTTCCTGTAAGTGGCAGTT
A_33_P3711933	0.180641	0.0122	-2.94924	-2.95428	-1.00523	A_33_P3711933	NM_152432	AAGAGCCTTATGGGCTTTCAGGACTGAAAAGAGCTTCTGCTTCTTCTCTCAGATCCATCT
A_33_P3274811	0.185488	0.0129	-2.91814	-3.00895	-1.005	A_33_P3274811	NM_001014450	AACCATTAGAGAATTCTGTTGATGTTTTCTGTGTCTGTCTGTCCCCTGGGCATGAGCTTC
A_33_P3246703	0.257182	0.0277	-2.50473	-3.72531	-1.00456	A_33_P3246703	AK095132	TCACAGGAGAAAGAGCAGGGCACATGCATGCCAGCATGCTGAAGGGAGGCCAAAACCCAT
A_24_P277295	0.06451	0.00155	4.07369	-0.97849	0.681607	A_24_P277295	NM_198490	CAAGTATTCCATTTGCATTTGGTAATTTTTCATGCCACCTATTTATGAATATATAAATCT
A_33_P3382162	0.064552	0.00156	4.07264	-0.9803	0.765355	A_33_P3382162	NM_000449	CTGACCTTTTCAGCTTGATACCCTGGGCTTTAGTGTAACCAATAAATCTGTAGTGACCTT
A_33_P3252441	0.064661	0.00156	-4.07102	-0.98309	-0.952552	A_33_P3252441		AGTCTGTGGTCGAGTCTCCTGCCACGTCACTTGCTATCATCCAACCTGTGTCATCTCCAC
A_23_P500333	0.058642	0.00128	-4.18468	-0.78777	-1.00421	A_23_P500333	NM_001009955	TCCTTTCAGAACGACAATTATTCTCCAAGCATGACGATGAGTGTGTGATCCCCCCTTCTC
A_32_P109036	0.058511	0.00126	-4.19118	-0.77663	-1.00368	A_32_P109036	NM_001076678	AAAGACGTCAATATCTGCTCACATCTTACTAAACACCAGAGAGTTCATGCTTAATAAAAG
A_24_P186943	0.065078	0.00158	-4.06519	-0.99316	-0.641018	A_24_P186943	NM_000501	TGGACTTGGAGTTGGTGCTGGTGTTCCTGGACTTGGAGTTGGTGCTGGTGTTCCTGGCTT
A_24_P145009	0.220423	0.0197	-2.69037	-3.40642	-1.00315	A_24_P145009	NR_003502	TGTCAGTAGTCCCACTTACTATGTCACTTTAATTGGATGAATGCGTTAATGAAAAGTTTG
A_33_P3249072	0.144779	0.00786	-3.18618	-2.53623	-1.00274	A_33_P3249072		ACCACTGATTGTCAAACTTAAGTGTGCATTAAAATTTCCTTGGGGGCGAATTAAAGTTCC
A_33_P3316233	0.101955	0.00387	-3.57085	-1.85632	-1.00273	A_33_P3316233	NM_016067	TTGAATATGATAGACATACATGTATATATGTATCAGTTCTGAGTTCCACTGGCCTATCCC
A_24_P246173	0.065294	0.00159	4.06085	-1.00064	0.539291	A_24_P246173	NM_004145	CACTCCCCTTTTTGTACGTTTAACTGTTTCTTTGTACGTGGTTTACGTAACTTTAAACTG
A_23_P314672	0.266121	0.0305	-2.4528	-3.81342	-1.00246	A_23_P314672	NM_144663	ACTGCTCCAGGTCTTTGCAGGGAAAAACTGTATGGATCGTGTTCTACTTCATGTGGATGT
A_33_P3248953	0.073562	0.00202	-3.92706	-1.23237	-1.0016	A_33_P3248953	NM_001164478	CGAGTAAACACCTCAAAACTTGAAAAACAGCTCCTGAAACTTGAGCAGCAAAGTACTGGA
A_33_P3377399	0.178885	0.012	-2.95746	-2.93984	-1.00158	A_33_P3377399		CAGTTACAGGTGTAAGCCACTGCCTGGCCTAAGATATTTATTTTAAATTGTATTTATGGT
A_33_P3409154	0.166903	0.0105	-3.02818	-2.81529	-1.0012	A_33_P3409154	NM_015482	AAGGAGCGCGGGTCGGAGGAGACAAACTCTTTGGAAATAACCCTTTCAAGACTTTCTTTT
A_23_P48455	0.148851	0.00832	-3.15546	-2.59055	-1.00085	A_23_P48455	NM_030943	CCCCTCTGGCCCCAGTCGAACTGGGGGCTAGCCACCTCCTCGTCCAGCCCCCAAACCTCC
A_32_P3998	0.065806	0.00161	-4.05246	-1.01512	-0.686622	A_32_P3998	NM_001004301	AAACATAGGAGAATTCATACAGGAGAGAAACCTCACGTGTGATGATTGTGGCAAAGCCTT
A_33_P3211654	0.197214	0.0147	-2.84795	-3.132	-1.00044	A_33_P3211654		CAGGTGGGGCCCAGCCCGGAAAGGCCTGCGTGGGCTCACTGGAGATGCTGACCGCGTCTG
A_24_P20120	0.211274	0.0181	2.73731	-3.32499	1.00075	A_24_P20120	NM_018084	TTGGACAATGAAAATGCCTTAAAAGGAATGCATATGGATAAAGTTGCACTTATAACACCC
A_24_P456723	0.092441	0.0032	3.6743	-1.67425	1.00087	A_24_P456723	NR_038386	AATGGACCAAGAAAAACTGCTTTACCATAGGACACTTGTGGCAATATGGCACCGATGGCT
A_23_P164691	0.193564	0.0141	2.87172	-3.09036	1.00166	A_23_P164691	NM_002162	CGTCTTCGTGGCGGTGTTACTGACCCTGGGCGTGGTGACTATCGTACTGGCCTTAATGTA
A_33_P3427102	0.025309	0.000261	5.10758	0.73765	1.00166	A_33_P3427102	NM_153712	GTAGAGAAAATTCAGTGACGTACATGGCTCTGGTTCTGGACACAAAATCTGTACTGGAGA
A_33_P3357843	0.066183	0.00164	-4.04464	-1.02863	-0.484696	A_33_P3357843	NM_000232	GGAATGAGAATGTCATGGTGCTAAACCTGACAAATAAGAGATCATTGAAATGCTGAAAAT
A_33_P3381948	0.234458	0.0226	2.61593	-3.53497	1.00203	A_33_P3381948	NM_001080436	GCTCCACGACAAAAGGACAAGATTTGACTTAAATTAAGTTTTTCCCTTGAGGATATTTTC
A_23_P114903	0.279583	0.0344	2.38757	-3.92329	1.00271	A_23_P114903	NM_002155	CAAAATGCAAGACAAGTGTCGGGAAGTCCTTGCCTGGCTGGAGCACAACCAGCTGGCAGA
A_23_P118722	0.319166	0.0484	2.19823	-4.23632	1.00353	A_23_P118722	NM_001671	TGAGGAGCTTGAAACCCGTGGCGCTTTCTGCAGTTTGCAGGTTATCATTGTGAACTTTTT
A_24_P327084	0.129446	0.00622	3.31249	-2.31279	1.00371	A_24_P327084	NM_152891	CAAGGCACGCAGTGATGGGCAAACCAATTGCTGCCCATCTGGCCTGTGTGCCCATCTTTT
A_23_P334282	0.044352	0.000715	4.51414	-0.23002	1.00466	A_23_P334282	NM_017593	GTTGTGTGCATTAGAAATCAGTTGCTTGATAGTAGCTATTAAACCCAATATTGCTGATAG
A_33_P3417452	0.066249	0.00164	4.04275	-1.03189	1.00539	A_33_P3417452	NM_001103167	CTCTCAGGAAGGATGAGCATTGTTACAGCAGGGACAATAAAGTACAGAGATATGCCGAGA
A_23_P76749	0.312113	0.0454	2.23289	-4.17974	1.00555	A_23_P76749	NM_020692	CCTGTTCTGTTTTTGCTTTTCCTCTTCTTGACCAAAGCATGTGCCACTAGCTGTCCTTGA
A_23_P411833	0.066636	0.00166	4.0362	-1.0432	0.760933	A_23_P411833	NM_145294	AGCAAGCTGTTGTAAATTTGGCGCCCTGTGAATACTTTCATACCTGTTGCCCTTTTGCCT
A_23_P27649	0.06681	0.00167	-4.03372	-1.0475	-0.752403	A_23_P27649	NM_001080411	GAGAAACCGTATAAATGTAAGCAATGTGGGAAAGCTTTTGGATGTCCCTCAAACCTTCGA
A_23_P38677	0.164031	0.0101	3.04865	-2.7792	1.00778	A_23_P38677	NM_006553	CAAAGCCTTCCAGAAGTTTTCTGTGCTTATGAAAGCGTATGTGTGGCCTTTCTCTTCCCT
A_23_P67367	0.248143	0.0257	2.54668	-3.65375	1.00788	A_23_P67367	NM_014475	GGAAAGTGAGCTCCTGGCTGACATCCTTGAAGAGGTGAGGAAGGCCATTGGAGTCACCTT
A_33_P3355230	0.079847	0.00241	3.82987	-1.40171	1.00859	A_33_P3355230	NM_002287	AGCTGAGCATCTGTATATTCTCATCGGGGTCTCAGTGGTCTTCCTCTTCTGTCTCCTCCT
A_23_P395585	0.067233	0.00169	-4.02683	-1.0594	-0.841153	A_23_P395585	NM_152533	TGGCCATCATAGACCGGGAGTGGTTTGTGGTCCCCCCAAAAAGCTACACCAAGCTAATAA
A_24_P171268	0.091513	0.00312	3.68753	-1.65102	1.009	A_24_P171268	NM_182663	ATGAAATGAGAAAATTATTGGACAATTCAGACTTTACTAAAGCACAGTTAGACCCAAGGC
A_23_P396328	0.311723	0.0453	2.23516	-4.17603	1.00931	A_23_P396328	NM_003829	ATAATACAATAGTTTAAGACTAAGGGAAACAGATGGAGCTGTTTATTGAGACAACTGGTG
A_23_P500998	0.272044	0.0324	2.42016	-3.8685	1.01131	A_23_P500998	NM_152739	AAACAGTTGCATAGAGTATAGCTCTGTAGTGGAATATGTCTTCTGTATAACTAGGCTGTT
A_23_P150852	0.314385	0.0462	2.2233	-4.19543	1.01175	A_23_P150852	NM_015292	GCCTTTGCCTGACCAAAGAGAAGAACCGTATGTTCCCTTTACTGCACGGCCTTTATCCTT
A_23_P55688	0.067741	0.00171	-4.01998	-1.07125	-0.742379	A_23_P55688	NM_017879	TGGAAGGCTTCCCTTCATGGAAATTCTTGTTTTCACACAACACTTGGTAGTTTTTCCAGC
A_23_P161152	0.204026	0.0162	2.79764	-3.21991	1.01233	A_23_P161152	NM_014317	AGTTCCCAGAAATGAATGCTATGATCATGCGACGGTTCAGTTTGCCTGGAGATGTAGACA
A_23_P57036	0.048587	0.000901	4.38137	-0.45318	1.01248	A_23_P57036	NM_001250	AACACTGCTGCTCCAGTGCAGGAGACTTTACATGGATGCCAACCGGTCACCCAGGAGGAT
A_33_P3383326	0.067932	0.00172	-4.01699	-1.07641	-0.633763	A_33_P3383326	NM_057159	CCACACCTGCAATGTAAAATGGAAGAAAATGCAAAGAAACCAAATGTGCCGAGTGAATAA
A_23_P167559	0.067932	0.00172	4.01637	-1.0775	0.717075	A_23_P167559	NM_144726	AAATGCCACTTTTAAAGCTGTTAATAGACTTTGCACCTTTTCTTTGACAAGGATGTGTCA
A_23_P151805	0.321427	0.0495	2.18535	-4.25726	1.01271	A_23_P151805	NM_006329	GGGAACCCTGGGAGTAGCTAGTTTGCTTTTTGCGTACACAGAGAAGGCTATGTAAACAAA
A_23_P110791	0.024527	0.000241	5.15708	0.81602	1.01271	A_23_P110791	NM_005211	ATCCTAACTAACAGTCACGCCGTGGGATGTCTCTGTCCACATTAAACTAACAGCATTAAT
A_23_P27315	0.085619	0.00277	3.75234	-1.53732	1.01339	A_23_P27315	NM_032048	ACTGTTCCCAAAGCTTGTTGGGCTCCTTAAATGGCATGTACAATTTAAGTGCAAAGACAG
A_23_P12079	0.09833	0.00359	3.61175	-1.78427	1.01414	A_23_P12079	NM_001039574	ACTTCGGCATGTACTACTCCCTGGCCATGGCCAAGCAGAAGCTGCCCAAGAAACGGAAGA
A_33_P3661309	0.206183	0.0165	2.78495	-3.24205	1.01467	A_33_P3661309	AK096113	TTCTCCAACCCCACCCATCGTTTTGAGGGTTAGCATTTGGAGAGGCCGTGATTTAAAAAA
A_33_P3263198	0.254222	0.027	2.51881	-3.70134	1.01538	A_33_P3263198		TGTGGACACAGCCACGTATTACTGTGCATGGAGAGCACAGAGACACAGCCCAGGATGCCT
A_23_P207367	0.017789	0.000125	5.56371	1.44534	1.01606	A_23_P207367	NM_003152	TCTCTGTTTGTAACCTTGTCGACAAAGAGGTAGAAAAGATTGGGTCTAGGATATGGTGGG
A_23_P37623	0.031548	0.000374	4.89227	0.39248	1.01903	A_23_P37623	NM_181077	ACTGTGGTGCAATCTACTGTTTGTGAATGTCTGTATTATCAGGAAACATGTCTATACGAT
A_33_P3314579	0.223566	0.0204	2.67216	-3.43794	1.01916	A_33_P3314579	NM_001142625	GATACCGCTGGGCAGGAGAGGTTCAAATGCATTGCATCAACCTACTATAGAGGAGCTCAA
A_33_P3342957	0.068099	0.00175	4.00859	-1.09095	0.777949	A_33_P3342957	NM_004226	TTTCGTTTCGATGACTCATTACCCAATCCCCATGAACTTGTTTCAGATTTGCTCTGTTAG
A_23_P58912	0.068517	0.00176	-4.00454	-1.09796	-0.745268	A_23_P58912	NM_006416	ATGATCAGTGCGGTTATGTGGAAACAACAACAAACAAACGAAGCTATCTGAGTGAACTGC
A_23_P149375	0.096309	0.00341	3.63905	-1.73623	1.01947	A_23_P149375	NM_053055	ATACAAAGAGGATTCAGTTTCCATCTTCTCAACTTTTTAACACAGAAACACTTCCTGCGA
A_33_P3560878	0.302192	0.0416	2.28218	-4.0987	1.0195	A_33_P3560878	BC029479	CTCCAAACTCTTGACCCACAGAACCTGTGAGAAAATATATGGATATTATTTTAAACTGCT
A_23_P119042	0.058986	0.0013	4.17534	-0.80376	1.02036	A_23_P119042	NM_005601	GTTTTGAGCGTTGTATTCCAAAGGCCTCATCTGGAGCCTCGGGAAAGTCTGGTCCCACAT
A_33_P3404879	0.20841	0.0174	2.75762	-3.28966	1.02103	A_33_P3404879	NM_012302	TATATTTAATGCTTTCCAGGGAGTGTTCATTTTCATCTTTCACTGTGCTCTCCAAAAGAA
A_23_P96165	0.121722	0.00543	3.3867	-2.18151	1.02197	A_23_P96165	NM_024650	AATACCATTTGTGTATGATACCCAATTTGGATCTCAATTTGGATAGAGATTTGGTGCTTC
A_23_P366366	0.124012	0.00563	3.36684	-2.21663	1.02223	A_23_P366366	NM_014766	AAAGAAAATCATTCTGTTTCCTGCAGTGGGAACTGGCCATGTAGTCTTAACAGTCTTTTG
A_24_P68585	0.069025	0.00179	-3.99595	-1.11284	-0.741568	A_24_P68585	NM_183001	TGTCCAGGCAGAGAGCTTTTTGATGATCCCTCCTATGTCAACGTCCAGAACCTAGACAAG
A_33_P3379326	0.278567	0.0341	2.39189	-3.91605	1.02244	A_33_P3379326	NM_138715	CAATGGGGGACAAGAGCCTGTTCACATTCTGAAGATGCTGGAGTCACTTGCACTTTATAA
A_23_P74269	0.286064	0.0362	2.35919	-3.9708	1.02283	A_23_P74269	NM_003132	TCCTATTACCAGCTCATGAAGACAGCCCTCAAGGAAGATGGTGTCCTCTGCTGCCAGGGC
A_23_P411851	0.31212	0.0455	2.23265	-4.18014	1.02309	A_23_P411851	NM_152592	AGAAGACACTTACTTTTTATACAGTGTTGTCTTAGTCTATTTATACTAAATGTGTACTAC
A_33_P3248794	0.184651	0.0128	2.92238	-3.00149	1.02314	A_33_P3248794	NM_005967	CACCTATCTGAGCAGTTAGAGCGTCTTTCTTTTCAGATTGTGTACAGTAGATTATTTATT
A_33_P3257856	0.069582	0.00181	-3.98838	-1.12594	-0.87756	A_33_P3257856	NM_145044	AAATCCTTTAGGCACAGTTCAGCACTTCTTCGACATCAGAGGCTTCATGCTGGAGAGTAA
A_33_P3232294	0.069629	0.00181	3.98738	-1.12768	0.697012	A_33_P3232294	NM_002223	AAATGAAGGGTCTTGGTTTTATATTCATCCGTTCTGGAAACTGAGAAGCGAGGGTGACAA
A_33_P3290394	0.081007	0.00249	3.81141	-1.43395	1.02384	A_33_P3290394	NM_000206	CCCTTCCTCTTTCCATCTACCCTCCGATTGTTCCTGAACCGATGAGAAATAAAGTTTCTG
A_23_P170733	0.293646	0.039	2.31722	-4.04068	1.02385	A_23_P170733	NM_058172	TTGGTGTCCAGGTTTGTGGCACTGTTCCAAGAGGCCTTACACACACACACAAATATACAA
A_23_P256561	0.287731	0.0367	2.35157	-3.98351	1.02446	A_23_P256561	NM_006068	AAGACTTAACAAAAACAATGTTTCATCTGGGGAACTGAGCTAGGCGGTGAGGTTAGCCTG
A_33_P3226177	0.258491	0.028	2.499	-3.73505	1.02592	A_33_P3226177	NM_001037332	GCCTACAGCCACATCTACAGCTCCTACAGGAATTTCGTGGGGCCACCTCATTTCAAGACT
A_24_P192994	0.185818	0.013	2.91605	-3.01261	1.02645	A_24_P192994	NM_013402	GGCCCAATATCAGTATTCTTTTTGTGTGTGCCAATTTTGTTATCACATCCCTATGAAGTT
A_24_P80532	0.070964	0.00186	-3.9725	-1.15348	-0.531217	A_24_P80532	NM_004354	AACCATCTGTATTAGCCTTGTGCCTTCTCAATTTGGAAGTGGAAACTTTGAAATCTGTTG
A_23_P31399	0.070964	0.00186	3.97195	-1.15443	0.981367	A_23_P31399	NM_000305	CATTGACCCAGAAATGTATGGCATGTGTAGTTAATTTTATTCCAGTAAGGAACGGCCCTT
A_33_P3213374	0.070964	0.00187	-3.9717	-1.15486	-0.816997	A_33_P3213374	NM_006079	TTTGCACCCTGCTGCAGGCCACCAGATGAACGGGACAAACCAGCACTTCCGAGATTGCAA
A_23_P305198	0.224312	0.0206	2.66654	-3.44767	1.02688	A_23_P305198	NM_003151	CAAAACTTGTTAATACAACTGGATGAACAGTTAGGTCGTGTTTCCAAAGAGAAAAACCTA
A_33_P3268989	0.215903	0.0189	2.71415	-3.3652	1.0273	A_33_P3268989		GGTTCCAGAAGATAACTTTGGATTGTCAGAATATTTATACTTGGAAGTCCAGGCAAGTAA
A_24_P413669	0.312681	0.0458	2.22853	-4.18689	1.0283	A_24_P413669	NM_001018053	TCAAATGGTTCTTTTATACTGTGGATGATACAGGACTCTGTTACCTAAGATGTGATAAGC
A_24_P365721	0.268161	0.0309	2.44541	-3.82591	1.0288	A_24_P365721	NM_007231	ATGCATTCTACCACTACATTTTGGTGCTATTTAAGGTGTGCAATTTTCTATAGGTGACTT
A_33_P3357097	0.311664	0.0451	2.23684	-4.17327	1.02907	A_33_P3357097	NR_034004	ATGTTATTTGTGCATGAGAATGAAACTCCTTGACCCTGAAAACAGGACGGGGAGTGGAGT
A_23_P338325	0.124012	0.00563	3.36619	-2.21778	1.02929	A_23_P338325	NM_005230	GTACTGCTTTCTTCAAACTCTCAGAAATCCTGATGACGTCTGGCCACAATTAAGGACTCA
A_32_P217543	0.318686	0.0482	2.19973	-4.23388	1.03037	A_32_P217543	DB326574	TTCCGGAGCCATAGTTTACCTATTTCCCACAAAAAGCAATCCTCTGTGTTCAGGAACCAA
A_23_P393777	0.166651	0.0105	3.03143	-2.80957	1.03195	A_23_P393777	NM_000953	TGCATTTGCGTGATCTCAAGACCTCCAGCCAGAAGTCCCTTCCAAATATAAGAGTACTCA
A_33_P3352098	0.261921	0.0291	2.47769	-3.77125	1.03204	A_33_P3352098	NM_021201	CGTGAGGTGATGGATATGTTAATTAGCTGGATTGTGGTAATCATTTTGGAATGTATATGT
A_33_P3406706	0.071628	0.00191	3.9595	-1.17603	0.946269	A_33_P3406706	NM_005107	TTAGTGACCAGATACTGCCAAATTGATGTGTTCTTGCTTTCCAGGTGAGCTTTTTGTTCT
A_33_P3301221	0.180923	0.0123	2.94696	-2.95831	1.03417	A_33_P3301221	AK128431	GGTTCAGGCCTCCTTTATGATACATGCCACAAACACAATATCTTTGTATTAAAAGGATTT
A_23_P502047	0.048314	0.000889	4.38911	-0.44011	1.03855	A_23_P502047	NM_003741	TTGGGATTTTTAATTTATCTTCACTCAGCACCAAGGGCCCCCGACACTCCACTCCTGCTG
A_24_P870620	0.286802	0.0364	2.35611	-3.97593	1.03889	A_24_P870620	NM_002825	CACTCGGACTGGAGCTGAGTGCAAGCCCATGAAGACCCAGAGATGTAAGATCCCCTGCAA
A_33_P3234546	0.071628	0.00191	3.95806	-1.17853	0.905381	A_33_P3234546	NM_004931	TTGGGAATGAGGCTTGCTGAGAGGGGCTGTCCAGTTCCCAGAAGCCATGTCAGTCTCTGA
A_23_P156284	0.304606	0.0423	2.27214	-4.11526	1.03997	A_23_P156284	NM_080881	TTGGGAAAATATCACTTTGTATTCTCTGTCCAGGGCTTCAGATATTTTGCACGAATTTTA
A_33_P3416171	0.131134	0.00639	3.2984	-2.33771	1.04118	A_33_P3416171		GCTGCTCCACCACGTGGTGCCTGCCCATCATGGCATCCACCACCAGGTGGCCTTTTTCTT
A_24_P192914	0.071988	0.00193	3.95345	-1.18653	0.950862	A_24_P192914	NM_153206	CTCCTGTGGGCAGGGTTCTTAGTGGATGAGTTACTGGGAAGAATCAGAGATAAAAACCAA
A_24_P310224	0.072053	0.00193	-3.95229	-1.18854	-0.633641	A_24_P310224	NM_032584	GTGTGGCAAAGCCTTTAGTCAAACTTCAAAACTTGCAAGGCATCAGAGAATTCATACCGG
A_23_P67278	0.072053	0.00193	-3.95173	-1.18951	-0.61677	A_23_P67278	NM_005815	AGAAACCTTATGAGTGTAAAACATGTAGGAAAGCCTTCGGTCATTATGATAACTTAAAGG
A_33_P3266780	0.072258	0.00194	-3.94881	-1.19459	-0.891683	A_33_P3266780	NM_015720	CTGGAGCAATCTGGCTGGGAAAAACTACATCATTCTGAACATGACAGAGAACATAGACTG
A_33_P3238866	0.072258	0.00195	-3.94827	-1.19552	-0.735177	A_33_P3238866	NM_016038	ACCTTGATGAAGTTCTGCAGACCCACTCAGTGTTTGTAAATGTTTCCTAAGGTCAGGTTG
A_33_P3300495	0.307228	0.0433	2.25996	-4.13532	1.0413	A_33_P3300495	BC022294	GCACTGTTGTATGTTCACCTGAAATGAATGGTGTAAGCTGAATATGAGATTTTTGACAAA
A_24_P476086	0.19622	0.0145	2.85519	-3.11931	1.04303	A_24_P476086		TAGGAGCCAATATAATAGAGCTCTAAAAGGATAGTATATCTTTAAATTCTGACTGGGGAG
A_32_P118847	0.220423	0.0197	2.69098	-3.40538	1.04315	A_32_P118847	NR_021491	GCATTGCTTTTCAACTTAATTGAATACTTACTATATGTGAACCACTGCACAAAATAGGGG
A_23_P98974	0.311664	0.0452	2.23646	-4.1739	1.04491	A_23_P98974	NM_003667	ACACCCAAGCTTGATGTCAATTAACTCTGATGATGTCGAAAAACAGTCCTGTGACTCAAC
A_23_P205997	0.126428	0.00591	3.34077	-2.26275	1.04631	A_23_P205997	NM_031301	AAGACAAGAACTTTCTTCTTTACAACCAGCGCTCCAGATAACCTCAGGGAACCAGCACTT
A_23_P61050	0.072258	0.00196	3.94532	-1.20064	0.563024	A_23_P61050	NM_152649	GAAGTGACTGTATGCCAGTTCCAAGCCTAGGTTTCAAGAGGCCTTATAAATGTCTGTTGG
A_33_P3409513	0.036403	0.000471	4.75621	0.17081	1.04883	A_33_P3409513	NM_002751	TCTGTGGGTCAGTCCTCTTTCCTTGTCCCAGGATGGAGCTGATCCAGTAACCTCGGAGAC
A_32_P162374	0.072354	0.00197	3.94251	-1.20553	0.916177	A_32_P162374	NM_173529	TGAGGCCTAATCCTGAACACATATAGAGCATATTGTTAGATATTTTTCCTGTGACATTTG
A_24_P200427	0.240153	0.0237	2.5896	-3.58022	1.04982	A_24_P200427	NM_001079525	GGCCCACGTTTTTATCATTAAGACCTATTTGTTAGCTAGTAGAGCTTTATGTTCGCTGTC
A_23_P22614	0.146969	0.00813	3.16827	-2.56791	1.05017	A_23_P22614	NM_145802	TTTGACCGTCTGAAGAAACTGCACCAGGACGAGAAGAAGAAACTGGAGGATAAGAAGAAA
A_33_P3775848	0.132795	0.00656	3.28352	-2.36403	1.0517	A_33_P3775848	NM_001289	CACCTCATGGTCAGAGATGAGAATGTAGCCTTTGTGACCAGATTATATTATTTTTAAATG
A_33_P3347320	0.073058	0.00199	3.93562	-1.21748	0.970111	A_33_P3347320	BC017676	TGCTTTCATGAGCTGACTTTTCAGTGAACCTTCAGAGGGTAAAGGGGAAGTTTTCCCTTG
A_23_P14174	0.14295	0.00766	3.20008	-2.51166	1.05271	A_23_P14174	NM_006573	TGAACCACCAGCTCCAGGAGAAGGCAACTCCAGTCAGAACAGCAGAAATAAGCGTGCCGT
A_23_P316960	0.097681	0.00351	3.6235	-1.76358	1.0533	A_23_P316960	NM_000837	CATCATCAACATCTTCCTGTACATCCTCACCATCATTGGCCGCGCCAAGGAGTAGCCGAG
A_33_P3217958	0.21424	0.0186	2.72127	-3.35285	1.05339	A_33_P3217958	NM_014824	AATTACTGATCATGTGCACTCGTACAGTATATTACTGTGACCACAAGGATGTGGCAAAGA
A_32_P57160	0.182583	0.0125	2.93533	-2.97874	1.05465	A_32_P57160	NR_026803	CAGAGGCTGTCGTTACTGCTGCACTTGGCTGTTTTTCTTTGGATAATTATTGCAATCAAT
A_33_P3418130	0.073487	0.00201	-3.9294	-1.2283	-0.981136	A_33_P3418130	NM_145052	AGCTTAAGCTGCTGCCTATGAATGATCAGATACGGGAGCTACAGACCATCATCCGTGACA
A_23_P131846	0.1923	0.0139	2.87735	-3.0805	1.05517	A_23_P131846	NM_005985	AACAATGTCTGAAAAGGGACTGTGAGTAATGGCTGTCACTTGTCGGGGGCCCAAGTGGGG
A_23_P98786	0.067982	0.00173	4.01246	-1.08426	1.05517	A_23_P98786	NM_000260	ATACCAACTGGGCCTCTGATGTTCTTCCAGTGAGGCATCTCTCTGGGATGCAGAACTTCC
A_23_P161659	0.103774	0.00401	3.55037	-1.89243	1.0557	A_23_P161659	NM_020826	AGGGTCCATTTCTCTTGGATGTAAAGGAGTCCTGGGTAAAATGTGGCTGTAACCTAAACC
A_32_P40288	0.271162	0.032	2.4272	-3.85665	1.05727	A_32_P40288	NM_052913	CAATCGGCTAACCTTGACATTTCTTTTTACCTTCATATGCCACTATCTCGGTAGTTCAAA
A_33_P3253239	0.300777	0.0411	2.2888	-4.08776	1.05847	A_33_P3253239		TGTCTAACTTATGTCCCTCCCGCAGTTCACAGAAGGCCCCTGACACTGGGACTACACGGA
A_23_P151851	0.293298	0.0389	2.31848	-4.03858	1.05887	A_23_P151851	NM_014080	GTCCTACTAAATATACTCTTTTGAGACTGGCCTCTTTTACTCACCATAATGCCTTTGTAA
A_24_P400172	0.100812	0.00378	3.58265	-1.83552	1.06077	A_24_P400172	NR_026966	TTACAGTGTTCTCTGTTAGTGTCAAGGGAATGAACCTGACGAGAAAAGACCAAACATAGG
A_23_P132121	0.218116	0.0192	2.70393	-3.38292	1.06183	A_23_P132121	NM_173354	CCAACACAAAACTCCTTCCCCTTTTTAAAATGATTTCTGTTCTAATGCCATAGATCAAAG
A_23_P74778	0.082205	0.00259	3.79089	-1.46984	1.06334	A_23_P74778	NM_024579	AGAAGGCTGCTATGACTCTTTGGATGGGAGTCTGGCAAGAGGAAATTGGAAGATAAAATA
A_24_P121846	0.073827	0.00204	-3.92094	-1.243	-0.848716	A_24_P121846	NM_003433	ATCAGAGAGTTCACACACAAGAAAGGCCCTATGAGTGCATCCAGTGTGGAAAAGCCTTTA
A_33_P3376821	0.093449	0.00325	3.66583	-1.68914	1.06417	A_33_P3376821	NM_006144	GGGAGCAGTTTAAATAACCGTTTCCTTTCATTTACTGTGGCTTCTTAATCTTTTCACAAA
A_24_P349151	0.294654	0.0393	2.31274	-4.04812	1.06438	A_24_P349151	NM_194292	TTAAACTAGGGATCTAATCTGAAAATTCAGTAACTAATATTAGGCAGTTGATACTCCCCC
A_24_P36944	0.276982	0.0337	2.39799	-3.90579	1.06475	A_24_P36944	NM_014812	TGCTGCTGTTTCAGCCGCAGCTGAATTTGAGAATGCTGAATCTGAGGCTGATTTCAGTAT
A_24_P305345	0.074753	0.00208	3.9117	-1.25908	0.84539	A_24_P305345	NM_021155	AGGGCGGCCCTGTACTTTTTGTGGCTTGGTTTCTCTGGAAATGTCACCTTTTCGGGCGCA
A_23_P356677	0.32232	0.0498	2.18143	-4.26362	1.06524	A_23_P356677	NM_006661	AAATGGAAAAATATGCTTCTACATATTTACCACCATAGGCGTTTTGTTCATATGAGCCTG
A_33_P3563369	0.113175	0.00475	3.45928	-2.05321	1.06543	A_33_P3563369	BG987537	TGGGTTGGGGGACTTGCCTCAAGCACACCACTGACCCTCCTGGGGTTCTTTTGTTTTGCA
A_23_P122896	0.075025	0.00209	-3.90793	-1.26563	-0.764793	A_23_P122896	NM_003227	ACAGCAGTGCCTATTCCTTCACGGCCTTTGTGGGAGTCCCTGCCGTCGAGTTCTCCTTTA
A_33_P3607600	0.206183	0.0167	2.78098	-3.24897	1.06631	A_33_P3607600	DB304787	ATTATGCAGAGACCACATTTCCACTCTCATGCTGCTCCACCACAGCAGCAATAGAGCGCC
A_23_P94103	0.186684	0.0131	2.91128	-3.02098	1.06641	A_23_P94103	NM_173833	CAATATGCTTGCCACTCCTTAAATGTCCTAATGATGAGAAACTCTCTTTCTGACCAATTG
A_33_P3806676	0.112662	0.00471	3.46365	-2.04549	1.06729	A_33_P3806676	AY751906	AGCGCTTCTCCCTGATTCTGGAGTCCGCCAGCACCAACCAGACATCTATGTACCTCTGTG
A_33_P3215252	0.304514	0.0423	2.2726	-4.1145	1.0675	A_33_P3215252		CCCCACATCTCTCCATCTGAAACTTCATTCTTCCATTAAAACAGAATTGTGCTTTGTGAT
A_24_P237778	0.314568	0.0463	2.22207	-4.19744	1.06915	A_24_P237778	NM_020379	TGGTTGATGTCGGGCAAGACAGATATGGAGGCTAAAAATATGTACTACGAAGCCTTGGAG
A_24_P876522	0.31608	0.047	2.21391	-4.21076	1.07014	A_24_P876522	NM_001008397	TAACTCCTGATCATCTTACAGCAGACATAACAACAGAGTGTTAGAGACTGGAATAAATAT
A_23_P21990	0.305449	0.0425	2.26975	-4.11919	1.07075	A_23_P21990	NM_152685	GAAGACACTCCAGAAAATACAGAAACTGCATCTGTGTGCACCAAGGTCTGAAAAATGACT
A_23_P141555	0.128449	0.00612	3.32143	-2.29696	1.07247	A_23_P141555	NM_013351	TTTTTTGAATGGGGGAGGCTATTTATTGTACTGAGAGTGGTGTCTGGATATATTCCTTTT
A_33_P3330608	0.091652	0.00315	3.68299	-1.65899	1.07265	A_33_P3330608	NM_032152	CGGGAAAGTCACAGAGCTGCCTGGGCTTGTACCTGGCCACATAAAGCCCCAGTTTAAAGC
A_32_P213661	0.076075	0.00214	-3.89445	-1.2891	-0.794868	A_32_P213661	NM_144974	AAAGCACATAAAAATAGTTTGGGGGAAGTAGAGAGCAAATGGTCATTTATGACTGAACTC
A_23_P98571	0.198607	0.015	2.83696	-3.15121	1.07291	A_23_P98571	NM_145017	ACCTACAACCAAGGGTACTTTGAGAACATCCCCAAGGGTCTAGACCAGGAAGGCTGGACT
A_23_P136817	0.09833	0.0036	3.61004	-1.78728	1.07328	A_23_P136817	NM_014708	CACGGGCCAGCTAGCAGGATTTTCACATCAAATTAGAAGTCTGATTTTGAATAATATCAT
A_24_P406754	0.1347	0.00679	3.26487	-2.39703	1.07469	A_24_P406754	NM_032211	GTCTCAACCAAGTGTCTGAAGTGAACTTTGCATTGAATAAATTTTTGCCATGGAAAGAAC
A_23_P4041	0.076654	0.00217	-3.88687	-1.3023	-0.893304	A_23_P4041	NM_021213	TCAGGATGTAAAGCCACAGAATGGGATTTATTAATGTGGGATACCTCAGACTGTTTGTTT
A_24_P240259	0.15921	0.00945	3.08708	-2.71138	1.07521	A_24_P240259	NM_024727	CTGTGACCAAGCTTCCTCAGATCACTGAGATAGGAATGAAAAGATGGATTCTCCCAGCTT
A_33_P3258712	0.183188	0.0126	2.93218	-2.98427	1.07757	A_33_P3258712	XR_109353	TAGGGCTTTTCTCCACTATGAATTCTATGATGTCGAATAAAGTGTGAGCTCTGATTACAA
A_24_P320033	0.088539	0.00297	3.71586	-1.60128	1.07846	A_24_P320033	NM_005191	CTATCTTCAAATGTCTAAGGTAGTAACTTTCCATAGGGCCTCCTTAGATCCCTAAGATGG
A_23_P128808	0.161928	0.0098	3.06748	-2.74597	1.08029	A_23_P128808	NM_013345	CCTCCCCTTGAGAGTCATCAGAAAAATACATTAGGAAAATGTGTTTAGAAATAAAAGCAC
A_33_P3229335	0.076717	0.00219	-3.88336	-1.30841	-0.689743	A_33_P3229335	NM_175055	AGTACACCAGCTCCAAGTGAGGCGTTCCTCGGCGTCCTGAACCCAAAGGCTCTTTTCAGA
A_23_P118246	0.317381	0.0475	2.208	-4.22041	1.08097	A_23_P118246	NM_016095	TGTGTGATGGTGCAAGGAATGGATTCAGGATGTTGTTGGAGAAACAAGTTTGTGATTAGT
A_23_P212696	0.321427	0.0494	2.18608	-4.25608	1.08415	A_23_P212696	NM_007085	CTTAGCCTGCAGGCTTCCTTGGGCTTTCTCTGTGTGTGTAGTTTTGTAAACACTATAGCA
A_23_P147431	0.027384	0.000293	5.03883	0.6282	1.08453	A_23_P147431	NM_002350	TGGGAAAGTATTCTGTACTCTTAGATGGATTCTCCACTCAGTTGCAACTTGGACTTGTCC
A_24_P8371	0.299277	0.0406	2.2949	-4.07767	1.08469	A_24_P8371	NM_001124758	GCTGCTGATTGTGAATCTCAGAGTCTTAAGAGAGAAGCCAAATATATTCCTCTTGTAAAT
A_23_P48997	0.078166	0.00229	3.85859	-1.35159	1.08533	A_23_P48997	NM_003978	TGGACTGTGGAGAGGAACGGGCAGCGTGGCTTCGTCCCTGGTTCCTACCTGGAGAAGCTT
A_33_P3364389	0.076717	0.0022	-3.8809	-1.3127	-0.813586	A_33_P3364389	AK293395	AGCAATGGGGGTGCCTGCAGCTCTCCCTGGAGTTCGACTTTGGAAGCCAGGAGGTGAAGG
A_33_P3279841	0.181495	0.0123	2.94291	-2.96543	1.08566	A_33_P3279841	NM_015133	TTTGGCCCTGCAAGCAAACCCACATATCTGCTCTGTATGTAATAAATGTCTTAACGTCGT
A_24_P253755	0.058086	0.00124	4.20027	-0.76107	1.08611	A_24_P253755	NM_004278	TGTGATGTTTTGGGGATTCCACTCTCCAGTGTAATGATTATTGACAACAGGGATTTCCCA
A_23_P55779	0.076723	0.0022	-3.8795	-1.31514	-0.877433	A_23_P55779	NM_000766	AGAACTTTCGCTTCAAGTCCCCTCAGTCGCCTAAGGATATCGACGTGTCCCCCAAACACG
A_23_P413760	0.309315	0.044	2.25054	-4.1508	1.08658	A_23_P413760	NM_175080	CTACAAGACCGAGAAGTATGTCATCGCCAAGAACAAGAAGGTGGGCCTGCTGTACCGGCT
A_23_P145957	0.047808	0.00086	4.408	-0.40824	1.08668	A_23_P145957	NM_022445	GCACTTTTCATTACTTTCTGCTTGACCGGAAGTTGAGGCTTAGCTATGTTTCCATCTTCA
A_32_P100641	0.076848	0.00221	-3.87662	-1.32015	-0.890591	A_32_P100641	XR_109584	CTGAATTTGTAGAAAGCTGCTTTGACTCTCTTGGGCCCCTTCATAAGCCCTGGAACTAAA
A_33_P3238969	0.306649	0.0431	2.26284	-4.13058	1.08765	A_33_P3238969	NM_001080488	TCACCATCTCGCAGCAGCTCGGCTTGGAGCTCAACACCGTCAGCAACTTCTTCATGAACG
A_24_P22981	0.076848	0.00222	-3.87579	-1.3216	-0.706666	A_24_P22981	NM_021047	TCATATTGAACGAAAACCCTACATAGTGAAGAATGTGACAGATCTTTTAAATGTTCCTCC
A_23_P99292	0.195084	0.0143	2.86461	-3.10282	1.08788	A_23_P99292	NM_006479	GGTTGGGAGAATCACAGCTTTACAAGGGTGTTTATATTTGATTTGTGTTTATATTTGAGG
A_33_P3276693	0.260027	0.0283	2.49272	-3.74574	1.08795	A_33_P3276693	NM_002632	TCCCTGCAGGGCCATCTGACTGCCAAGCCAGATTCTCTTGAATAAAGTATTCTAGTGTGG
A_32_P80245	0.190511	0.0136	2.89012	-3.05812	1.0886	A_32_P80245	NM_001109809	CCTCTGTCAGGATGCCAGATCCAACTCTCATCCAGTGAAGCCCTCAAGACTCAATGTCTT
A_23_P501134	0.077286	0.00224	-3.86978	-1.33208	-0.620513	A_23_P501134	NM_002311	GGAAATCTGCCACTAACCTTCCCCAACTCAAGGAACTGTACCAGTTGTCCAAGGAGAAGG
A_32_P167239	0.172758	0.0112	2.99448	-2.87467	1.08904	A_32_P167239	NM_152406	AGAGCTCTAATGTCCACAGGATGTTGTAGGGTAGGGTCTCTCAGTAAATCAAGTCCCTTA
A_32_P46214	0.12011	0.00525	3.40455	-2.14994	1.0904	A_32_P46214	NM_173653	TTTTTTGCTTTCCAAACAGAATCTCTGGGGCACAAGTTTTACACTCAAGCTAAGTATAAC
A_24_P935986	0.1746	0.0115	2.97977	-2.90057	1.09053	A_24_P935986	NM_005504	ATGCTCTGAAGGTTTTGTAGAAGCACAATTAAACATCTAAAATGGCTTTGTTACACCAGA
A_23_P57413	0.225262	0.0207	2.6635	-3.45292	1.09074	A_23_P57413	NM_014634	CACACAGACCAGAACGGCAGGATGAGAAGGCGCGCATTGAAGCATTGGGTGGCTTTGTGT
A_33_P3384562	0.082205	0.00259	3.79127	-1.46918	1.0931	A_33_P3384562	NM_213636	GGTACTGCTGTCTGCCAGGTCTGTGCTGCCTTGGGCATGGAATAAACATTCTCAGCCCTG
A_33_P3255304	0.274719	0.0331	2.40791	-3.88912	1.09365	A_33_P3255304	NM_001099781	TCCCACCCTCTCGATCTGTATATCCTCCAGTCCAAGATTAAAGAGGCGGACTGTGGCCTG
A_33_P3373459	0.016935	0.000113	5.6244	1.53702	1.09375	A_33_P3373459	NM_018641	CTTGTTCACTCCACTGCCTCTATCCATTGAGTACTGTATCGATATTGTTTTTTAAGATTA
A_23_P53467	0.201428	0.0158	2.81137	-3.19594	1.0938	A_23_P53467	NM_201612	GTTTAGAACCATTAGTAAATGATTTAACACTACGCATTGGGAGATTGGTTACCGACTTAC
A_23_P500206	0.078035	0.00228	-3.86007	-1.34901	-0.811852	A_23_P500206	NM_153483	GCGGTCTTCCCACTTCCTCTCCAGAACTCCAGAAAGAGCAGTGTGCTTATGCTTCAGTCC
A_23_P209347	0.1347	0.0068	3.26467	-2.39739	1.0938	A_23_P209347	NM_153697	GCTGCAAGATACGGTCATGAGCTTTTGATTAACACCTTAATAACCAGCGGAGCTGACACA
A_23_P208238	0.078398	0.0023	-3.8557	-1.35663	-0.628742	A_23_P208238	NR_023311	CCATACTGGACATAAATCTTACAAATGTCTTAAGTGTGGCAAGGTCTTCAGTCTGTGGGC
A_23_P113351	0.160533	0.00957	3.07995	-2.72397	1.09449	A_23_P113351	NM_004684	TGTTCATAATATCATGTGCACTTCAAGAAAATGGAATGCTACTCTTTTGTGGTTTACGTG
A_24_P252043	0.078398	0.0023	-3.85529	-1.35733	-0.854608	A_24_P252043	NM_003463	GTTGATGACTGGTTAAGTCTTGTGAAAATTAAGTTTCGTGAAGAACCTGGTTGTTGTATT
A_23_P502142	0.104881	0.00411	3.5374	-1.9153	1.09515	A_23_P502142	NM_002037	AATCCGAACCTCCTCTGTGAAGCATTCGAGACAGAACCTTGTTATTTCTCAGACTTTGGA
A_23_P146187	0.28773	0.0366	2.35332	-3.9806	1.09535	A_23_P146187	NM_015169	GAATTAGGGAAATAATTTGGTGGAAACCGGGAATGAGTTCTATTCTTAAACAGCCTTTTT
A_33_P3397743	0.07887	0.00232	-3.85032	-1.36601	-0.71347	A_33_P3397743		CAGTCCGTGGATGCAGGTTATCCCAAAATCATTGATGACCTCCCCGGAATTAGTAAAAAA
A_23_P82523	0.19622	0.0146	2.85354	-3.12221	1.09565	A_23_P82523	NM_000927	GTCACTGCCTAATAAATATAGCACTAAAGTAGGAGACAAAGGAACTCAGCTCTCTGGTGG
A_33_P3364696	0.079024	0.00233	-3.84815	-1.3698	-0.69626	A_33_P3364696	NM_213622	ACAGACCTTCGATGAGCGTTTGAGTCCAACACCTTCCAAGAACAACAAAACCATATCAGT
A_33_P3884179	0.203572	0.0161	2.80065	-3.21467	1.09633	A_33_P3884179	NR_040097	CACAATATTTTAACTATGTCCTTTAAAAAGTTTCTCCACAGACACTACCCAAAGCAGTCC
A_32_P516818	0.206178	0.0165	2.78613	-3.23999	1.09639	A_32_P516818	NM_001243729	CCGAACACGGCGGTACATTTCCTTGAGAGTCTTCTACATTCATGCTGTAGAAGCTATGAA
A_32_P118250	0.079081	0.00234	-3.84611	-1.37335	-0.731481	A_32_P118250	NR_023921	GGAGTGTGTCTTTGATATTTTAATAGAAATCACCTATTGCCCTCTAGAAAAGCTGTACCC
A_33_P3391736	0.296196	0.0398	2.3059	-4.05947	1.09862	A_33_P3391736	BM918748	CAGTAATATACGTTCATTGTAGACTCTTTGGACAGTATGGGAAAGTATAAAGAAGACATC
A_33_P3268472	0.157556	0.00927	3.09742	-2.69312	1.09874	A_33_P3268472	NM_001114173	TTGTTCATGCAGCTGGGAACTGTGGGGATATATGATTTGCCACATCTGAGGAACAAACTG
A_24_P291826	0.055149	0.00113	4.25384	-0.6696	1.09882	A_24_P291826	NM_001009991	ATACGAAGACAGCGTTCCTCAGAGTAATGGAGAGCTCACAGTCCGGGCTAAGCTGGTTCT
A_23_P151820	0.065774	0.00161	4.05532	-1.01018	1.09892	A_23_P151820	NM_024832	AAGTCCTAATAGCCCTGAGACACCGAGACGGCATGTTCTTCATTAGACGGAAAGGGAAAC
A_23_P32175	0.270847	0.0319	2.42838	-3.85466	1.09967	A_23_P32175	NM_014368	TCAGGGTCTATTCCTTGCGTGGATTATGTGGCCGTAGCATGTTACAGTTCAAACATGTCT
A_23_P252236	0.293952	0.0391	2.31579	-4.04305	1.09975	A_23_P252236	NM_000892	AGATATCAAGATTATAAAATAACCCAACGGATGGTCTGTGCTGGCTATAAAGAAGGGGGA
A_32_P187617	0.079463	0.00237	-3.83964	-1.38465	-0.624855	A_32_P187617	NM_030794	AGCCAGAAAAAATACTAGAATCATCTATTCCTATGGAGTATGCAAAAATGTGGAAACCTG
A_24_P38347	0.187958	0.0132	2.90574	-3.0307	1.10134	A_24_P38347	NM_001386	CAATTTTTGTTTCAATTCTAAGAAACACTTGCAGCTCTAGTATTCACTTGAGTCTTCCTG
A_33_P3214012	0.079674	0.00238	-3.83709	-1.3891	-0.686533	A_33_P3214012	NM_019036	AATGTTGGAAAGTGTGATGAAAGAAATCCCACCAGGTGCTCTTGCTGTTCACTGTCATGA
A_23_P44724	0.264254	0.0299	2.46312	-3.79595	1.10135	A_23_P44724	NM_001321	TGTACTTGGATAGGCTGGCTAACTCGTAGGAAGAGAGCACTGTATGGTATCCTTTTGCTT
A_33_P3362153	0.303598	0.0421	2.27573	-4.10934	1.10291	A_33_P3362153	NM_001190764	CCAGACGGACGCTCCCTGTACCCCCTCCCTCCTCACTTGGATAAAAAGCAGATTTGCCTT
A_32_P377032	0.209462	0.0176	2.75086	-3.30142	1.10363	A_32_P377032	NR_024079	TAAGGACAATGGCAGTAGAGATGAGGTTCTTGTCCCTCATAAGAATTGCAGGAAGAATAC
A_23_P30223	0.079847	0.00239	-3.83344	-1.39548	-0.693801	A_23_P30223	NM_001047	TACAACTGTCTTTGATGGCATTTTCAGAACAATAAATGTCACAATCCCTTCTATAGCCCC
A_33_P3228023	0.079847	0.0024	3.83268	-1.3968	0.838451	A_33_P3228023	NM_021626	CATTTTCTCAGAGTCCTATGGAGGAAAAATGGCAGCTGGCATTGGTCTAGAGCTTTATAA
A_32_P117313	0.079847	0.0024	-3.8319	-1.39817	-0.769228	A_32_P117313	NM_001171796	ATGACTGTAAGATCTTGAGAGTATGTTCTTACTCATTTCTGTAATTGCAGTAGTGTAGTC
A_23_P320225	0.281556	0.0349	2.37887	-3.93787	1.10589	A_23_P320225	NM_147127	CCCTGTACCCATTGTAGGGGCAGAAACCATTGATCTATTAAACACAGGAGAGAAGCTCTT
A_33_P3353027	0.13144	0.00643	3.29454	-2.34453	1.10602	A_33_P3353027		AGTTTTGTAAGTTTGTAGCATTTCGACTTAAGAAGTTATTAAAGCTTAAAACTGCACTGA
A_23_P216455	0.256128	0.0274	2.51034	-3.71576	1.10684	A_23_P216455	NM_005059	TACTCATTCTCGAAAAAAGAGACAACTCTACAGTGCATTGGCTAATAAATGTTGCCATGT
A_33_P3228285	0.079847	0.00241	3.83045	-1.40069	0.748912	A_33_P3228285	NM_207354	AATTTATTTATTTATAAACTCTCTGCTGCTGAGCTTGGGGCCTGGAGCCCCAGGAATGAG
A_33_P3367917	0.062828	0.00147	4.10367	-0.92685	1.10809	A_33_P3367917	BC011636	CTCTAAGTTTGTAAACATGGATGTGTGCAAAGATTTTAGCTCTAAGAATGTTTGTCAGTG
A_33_P3585268	0.027637	0.0003	5.02436	0.60507	1.10932	A_33_P3585268	NM_002070	AGACGCCACCATTCCTGGAAACCACAGTCCACCTGCTCATTCTCGTAGCTTTTTAAAAAA
A_23_P44155	0.19054	0.0136	2.88911	-3.05988	1.11124	A_23_P44155	NM_198196	GTTACATAGCGACAGATAACTATACAGCTCAACAACTAGAAAAATAAACTGTTTACCTGC
A_33_P3353791	0.099014	0.00364	3.60438	-1.79724	1.11126	A_33_P3353791	NM_181501	CAGGGTTCATTCAAACCCCCAAGCTGTGAGAGTGTGTTTATTTTTAATTTTTTAAAAGGT
A_33_P3275973	0.300481	0.041	2.28959	-4.08646	1.11169	A_33_P3275973	AK123416	CAACAGGTGATAAACATAGACTCACAAGTGACCCAGATGTTAGAATTACAAAAGACTTAA
A_23_P11598	0.079922	0.00243	-3.82625	-1.40803	-0.514802	A_23_P11598	NM_152373	CAGTGTATCATATGTGGCAAAGCTTTTGGCAACACATCCGTGCTTGTTACACACCAAAGA
A_24_P187948	0.172471	0.0112	2.99635	-2.87138	1.11195	A_24_P187948	NM_197966	GAAGACAGGCTGGAAGATAGCTGTGACTTCTATTTTAAAGACAATGTTAAACTTATAACC
A_24_P357468	0.133132	0.00661	3.27992	-2.37042	1.11225	A_24_P357468	D13077	AACGGTTTTGAGGCTGAATTTAAGAAGAGTGAAACCTCCTTCCACCTGACGAAACCCTCA
A_23_P108514	0.040819	0.000597	4.61856	-0.05613	1.11228	A_23_P108514	NM_001008910	CACCCATTCCATCCAGGACTTCTCTTACACTTGAGGGTAGCGGGGTCAGGACAATCATCT
A_33_P3321632	0.079983	0.00244	-3.82409	-1.4118	-0.666385	A_33_P3321632		TTCTGGGACTTCCTAGAGAGTGTCTCATACTTACAAACATACCTGCCTCTACTGGTCATC
A_23_P110473	0.262556	0.0294	2.4729	-3.77937	1.11279	A_23_P110473	NM_004536	ACCACTTATATTGCTAGCTACATTAAGAATTTCTGAATATGTTACTGAGCTTGCTTGTGG
A_23_P147199	0.080199	0.00245	-3.82168	-1.416	-0.457739	A_23_P147199	NR_024565	AGAAACCCTACCAGTGTGTTCAGTGCAGCAGAAGTTGTAGCCAACTCTCTGAACTTACTA
A_33_P3244117	0.127417	0.00601	3.33141	-2.2793	1.11282	A_33_P3244117	AK122666	GAGCTGGATCTGTGTTGGGACTGGTACTCTATCTCAGAGAAAGGGCCATGGCCCCAGTGA
A_33_P3329898	0.284139	0.0357	2.36662	-3.95837	1.11329	A_33_P3329898	CR627426	TTCATTATAGCTAGGATTCTTCCTTCTCGCAAGCTATTTTGGAGGAGTGTCAGGGACCTC
A_33_P3259507	0.080738	0.00247	3.81641	-1.42523	0.974005	A_33_P3259507	NM_012166	GCCGTTACTATTTTCTAAGAAATGACTTTTCTGTGAACCAACAGTAACAAAAACCTCAGT
A_23_P155123	0.224045	0.0205	2.66834	-3.44456	1.11504	A_23_P155123	NM_000106	TACAGGGCTTCCGCATCCCTAAGGGAACGACACTCATCACCAACCTGTCATCGGTGCTGA
A_33_P3343750	0.080977	0.00248	-3.8134	-1.43048	-0.569645	A_33_P3343750	NM_152603	TATGAATGTCCTCAGTGTGGGAAAGCCTTTAGCAGGAAGTCATATCTCATTCATCATCAA
A_33_P3247175	0.29329	0.0389	2.31874	-4.03816	1.11505	A_33_P3247175	NM_001114357	AAAGAACTACAAGACTTCTTCAGTACCATCCTATTAGCAACTGGAAGACAAGTAGCTTTC
A_23_P164047	0.079983	0.00243	3.82435	-1.41135	1.11576	A_23_P164047	NM_012329	AGAAGAAGTGGTATTTGCTGGCGAGTTAAATAGGCAAGGTACCCAGTGATAACACCAACC
A_23_P98645	0.271332	0.032	2.42631	-3.85815	1.11801	A_23_P98645	NM_003737	GTTGCTCACTGACCTGTGACCAGGTCCAATGTGGGGAGAAATATGAAGGAGGTAGCAGCC
A_23_P252082	0.138158	0.00716	3.23673	-2.44683	1.12003	A_23_P252082	NM_018487	GAACCAGACTGAGGAAAAGAGGCTCTTCAACAGCCCCAGTTATCCTGGCCCCATGACCGT
A_32_P61684	0.21424	0.0186	2.72124	-3.35289	1.12076	A_32_P61684	NM_018440	GTAATGGTACCTGAGGAACTGAAATGGGTATTTGTTTTCGTATGTTTCTGCCAGTAGTAT
A_23_P106727	0.120411	0.00528	3.40157	-2.15521	1.12098	A_23_P106727	NM_014700	AGAGGTCGCCTCCTATTGTACATTTGGGGAAAGCCTTGGGTGTAAATCAGTGTAAACTTG
A_23_P62999	0.288743	0.0371	2.34569	-3.99332	1.1214	A_23_P62999	NM_004455	CCCATCTCTTTCGCCTGCACACTTGGAACTCAGCAAGAAGGGACTGTTTCTAGGTGGGCT
A_24_P381975	0.081217	0.00251	-3.80789	-1.44011	-0.647366	A_24_P381975	NM_001077419	CAGCATCCTGCTTATCTTCCTCTGGGTGTTTGAAAGAATCAAGATCTTCGTGTTTCAGAA
A_23_P347632	0.081401	0.00252	-3.80612	-1.4432	-0.676885	A_23_P347632	NM_014751	AATAAAATGTTGCCAAATTCAATGTAGAAAGAATGTGACAACACACCTTGGGTAGTTCTG
A_32_P123255	0.081604	0.00253	3.80359	-1.44763	0.888475	A_32_P123255	NM_001105576	CGGGTAGAGTCAGCCTCTGACAACCTCCTCCTGAGACGACCCAGCCTTACTGGTACTTTT
A_23_P125748	0.12011	0.00525	3.4044	-2.15021	1.12181	A_23_P125748	NM_001011657	CCAGTACCCTTGAGCCTTAATCAGCAAGAAAATAACTCTGGCTCATACAGTGTAGAATCT
A_33_P3389872	0.241582	0.0241	2.58049	-3.59586	1.12294	A_33_P3389872	AK127729	GTGTGTCATTGTATCACCAAATCTCTGTCCAATCTGTTAACAGACTCTTAAATAAACCAT
A_24_P116909	0.170384	0.011	3.00683	-2.85293	1.12369	A_24_P116909	NM_006785	TGTGTATACATATGTTTATCTCACACACATTATGAGCTTGAATTCTTAATTCATCCTAGC
A_33_P3222203	0.081861	0.00254	3.80041	-1.45319	0.946322	A_33_P3222203	NM_148962	GCTGCATGTTCTGTGCTCTCCAGTTTGTCCCTTCCAATATTAATAAACTTCCCTTTTAAA
A_23_P208523	0.081984	0.00255	-3.79906	-1.45554	-0.520337	A_23_P208523	NM_024316	TACGGAAGAAAGCCAGACATCAGAACTCACTGCCTGAGCTTGAAGCAGCAGAGGCGGGAG
A_33_P3247629	0.082096	0.00255	-3.79779	-1.45777	-0.620338	A_33_P3247629	NM_015509	TTCTCCATTACATTCAAGCTGGTTTATGTCACTCCCCTGTGTTGTTACTTGTACAGCCAA
A_23_P29773	0.234142	0.0225	2.61866	-3.53027	1.12581	A_23_P29773	NM_014398	ACCATGTTGACTTTCCTCATGTGTTTCCTTATGACTCAGTAAGTTGGCAAGGTCCTGACT
A_23_P83098	0.082172	0.00256	-3.79595	-1.46099	-0.820308	A_23_P83098	NM_000689	GGAGAGTACGGTTTCCATGAATATACAGAGGTCAAAACAGTCACAGTGAAAATCTCTCAG
A_23_P302550	0.270827	0.0319	2.42855	-3.85436	1.12625	A_23_P302550	NM_130782	GAGTCTAAGGCCCTAGCGATTTGGGCATCTGCCACATTGGTTCATATTCAGAAAGTGTTA
A_23_P19624	0.31936	0.0484	2.19726	-4.2379	1.1267	A_23_P19624	NM_001718	TGGTTCTCTGCCTTTTTACTATACAGCATACCACGCCACAGGGTTAGAACCAACGAAGAA
A_23_P75786	0.082205	0.00258	3.79272	-1.46663	0.807805	A_23_P75786	NM_016582	CTGCCCCAAGGACTTTGGGAACATCAACAATTGCCGGATGGACCTCTACTTCTTCCTGCT
A_33_P3262351	0.082205	0.00258	-3.79271	-1.46665	-0.524015	A_33_P3262351	NM_001089584	TTGGTAACTGTTGGGTTGGTTTCTGTTCACTGGCTCTCTACATTTGCCAGGATTCTTTGG
A_23_P306223	0.082205	0.00258	-3.79208	-1.46776	-0.821477	A_23_P306223	NM_139058	GGTTTTCTCCCCCAGACGCCTGATATTGAAGTAAAAAATTTAAAAAGCCCAACCTCTTCC
A_33_P3294654	0.082205	0.00258	-3.79193	-1.46801	-0.67277	A_33_P3294654	NM_030907	CTTTGGCAGCACCGATGGAGGATGACTGGGAGAGGGGGTGCCTCTCAAGTTACTTCAATC
A_23_P21706	0.241245	0.024	2.58442	-3.58911	1.1267	A_23_P21706	NM_001905	TTTCTTCCAGGATGGTGTTACTGCAGTTGAAGGGCAATATGAAGTTACTTTCTTAATGTG
A_23_P53057	0.250431	0.0261	2.53776	-3.66899	1.12701	A_23_P53057	NM_013250	AAGTTGCAGTTCCTAAGAACCTATTGATGATGTTCAGTGCAGACTTACTGTACCTTTGGG
A_23_P83347	0.262101	0.0292	2.47629	-3.77363	1.12705	A_23_P83347	NM_145051	TTGGTATTGTCTTCCTTTGTAGTGTTGTTTATTTTACAATCCAGGGATTGTTCAGGCCAT
A_33_P3315223	0.082205	0.00259	-3.79075	-1.47008	-0.56823	A_33_P3315223	NM_006805	GACGTTGAAGGCTCAAAGCTATACTAAGAAGCTTTCTGAAAGATTGGGCTTTAAAATAAA
A_23_P156443	0.049929	0.000949	4.35206	-0.50275	1.12717	A_23_P156443	NM_002269	TATTTGGTAGCTTTAGGCTGCATTAAACCACTTTGTGATCTTTTGACTGTTATGGACTCC
A_23_P18017	0.301987	0.0415	2.28291	-4.09749	1.12744	A_23_P18017	NM_001870	GCCAAGTATATCCTCAAGCATACTTCCTAAAGAACTGCCCTCTGTTTGGAATAAGCCAAT
A_33_P3411291	0.176954	0.0118	2.96716	-2.92278	1.12753	A_33_P3411291	NM_003647	GAAATAAGATTCAGAGCACTTGGGATTGTAAGTTATAGGTTCTGAGCTGAACTGTTTATC
A_33_P3211423	0.082258	0.0026	-3.78847	-1.47407	-0.771493	A_33_P3211423	BX648891	GGGTTTTGCTTGTTTGTATTGGATAACCATTAAGCCAACTTCAGTTTCTCTGCCTTTTTT
A_33_P3494748	0.272044	0.0324	2.41996	-3.86885	1.12777	A_33_P3494748	NM_194291	GTATTGATGGCAGTCCACTCTGTTTTCTAAAAATGTATTTTACTGTGGTGCTTAACTTCT
A_33_P3359900	0.097058	0.00347	3.62941	-1.75318	1.12866	A_33_P3359900	NM_198449	CTCAGCAGGAGCTTCATCAACGATATATGTCAGATCTAAAGGTATATTTTCATTCTGTAA
A_33_P3328928	0.020998	0.000181	5.33143	1.08904	1.12937	A_33_P3328928	NM_017593	GAATTTGACCTTCTAAGATCAAGTAAGGGACACTTGAAGGCTTATTTTGCTTCACAGTAA
A_23_P385034	0.044352	0.000714	4.5147	-0.22908	1.12967	A_23_P385034	NM_001949	GGTGACCTGTTCTCTAGCTGTGATCTTACCACTTCAAATGGGTGTAATTTGAATAAATTT
A_33_P3258274	0.162209	0.00982	3.06595	-2.74867	1.13071	A_33_P3258274	AB209866	GAGACACTGGAAGAATGCAAGAACATTTGTGAAGATGGTCGTAAGTTTATTTCTTATTTC
A_23_P209232	0.049713	0.000941	4.35671	-0.49488	1.13092	A_23_P209232	NM_024692	GCTTATGAAATGTCATTTAAAGTTCACTTCTTGAGCATCAATAAAAAGGGAAGCTGTGTG
A_23_P1374	0.038193	0.000532	4.68598	0.05536	1.131	A_23_P1374	NM_006257	ACTGATCAACAGCATGGACCAGAATATGTTCAGGAACTTTTCCTTCATGAACCCCGGGAT
A_33_P3254555	0.082598	0.00263	-3.78203	-1.48534	-0.592904	A_33_P3254555	NM_017696	TGATGTTTCGTGATACTGTAACTCTGGAAGACGCTATTACGGTGGTGTCAGTCATGGAGT
A_24_P11100	0.199747	0.0155	2.82059	-3.17984	1.13149	A_24_P11100	NM_001011657	TCTTGGGTATTGAACTTTTAGTTTTGTTTGCCCAAGGATTAATTGAGGAAATCAGCTAAG
A_23_P168229	0.125297	0.00575	3.35557	-2.23656	1.13196	A_23_P168229	NM_030810	ATACGCAAGGGGATGTGGATACTTGGCCCAAAGTAACTGGTGGTAGGAATCTTAGAAACA
A_23_P166779	0.205896	0.0164	2.78805	-3.23663	1.13266	A_23_P166779	NR_024065	AGTGATATTTGCCTTAGGTCAGATTCTACTAGTTTAAAGCAAAACGATCTCCTGGTCTGA
A_33_P3340342	0.083215	0.00266	3.77602	-1.49586	0.863466	A_33_P3340342	NM_144601	AGACTGTTTCAAAGAAGAGCTCATAGACTGACTGGTCCAGAAGACAGAGGGTACAACAGT
A_33_P3375762	0.083547	0.00267	-3.77332	-1.50058	-0.872461	A_33_P3375762	NR_040117	AAACCCGTGCTGTCTGCTCGCAACTCCATGATGTTTGGACACCTCAGCCCCATGAGGATC
A_23_P44195	0.086409	0.00282	3.74314	-1.55345	1.13348	A_23_P44195	NM_138962	ATGGCTCACTTCGGATCGAGGGTTGACTACATCTCATCATCTCACGAATCTGCTGTAATA
A_33_P3243069	0.143265	0.00768	3.1986	-2.51428	1.13401	A_33_P3243069	NM_001162893	TGATCATCACACTCCTCTTCATCTGTTGCCATTGCTGCTGGAGCCCACCAGGCAAGAGGG
A_33_P3310784	0.089033	0.003	3.70946	-1.61251	1.13626	A_33_P3310784	NM_023003	TGTAAAAAATTACAATTTAGTGCCAACAGTAGTGAGCATGAAATGAAACTATTCAAAAGA
A_23_P141429	0.163978	0.0101	3.0508	-2.7754	1.13739	A_23_P141429	NM_016428	AGCTGTGTTCTGTCCTTCCTCCCATCGGAGGGAGAAGGGGTCCTGGGGAGAGAGAATTTA
A_23_P26771	0.258442	0.028	2.4997	-3.73387	1.13757	A_23_P26771	NM_006678	ACCAAAGGGTCAGCAGGGAAAAGGAATGGCCGAGTGTCCATCAGGGACAGTCCTGCAAAC
A_24_P55225	0.224208	0.0206	2.66713	-3.44664	1.13822	A_24_P55225	NM_152732	TTCAAGACCCCTTTTGGACCCACCCATGTCAATCGGACCTTTGAAGGACTGTCCTTGTCT
A_24_P235305	0.084234	0.00271	-3.76529	-1.51463	-0.875581	A_24_P235305	NM_001042510	ACTATATCTCAGTGATAGGGAAATAGCTGCATTGATCTTACATGAGCATAATCATCCTTA
A_23_P35564	0.170211	0.0109	3.00787	-2.8511	1.13842	A_23_P35564	NM_015490	TTTGCATTTGTGGCACTGTCTTTGATGCAGTGATGTACTTAATGGTGCAATAAAGCTGCT
A_33_P3227041	0.164336	0.0102	3.04605	-2.78379	1.13846	A_33_P3227041	NM_197966	ACTGGCTAAAGCTCGATGTGGTCACAGCTGTATAGCTGCTTCCAGTGTAGACGGAGCCCT
A_24_P167338	0.281823	0.035	2.37783	-3.93961	1.13922	A_24_P167338	NM_014488	TTCCTTGACTTAGCATGCCGACTCATCAGTGAAGCCAGACAGAACACACTTGTGAACAAT
A_24_P368735	0.16942	0.0108	3.01259	-2.84277	1.13938	A_24_P368735	NM_173664	ACTACAGAATAACTGATATTCACCCACCAAACAGAAAAAGTGAAGGCTGGGTTTTTCCCC
A_33_P3355708	0.270328	0.0316	2.43257	-3.84758	1.14234	A_33_P3355708	NM_001008404	TGTGGTTGTGGCTTTGTCGCCGGATTGCAGAGCTGAAGGGAGCCCTGTGGATGACAAACA
A_23_P169092	0.165884	0.0104	3.03587	-2.80174	1.14459	A_23_P169092	NM_004820	CATCCACCTCACCAGAGAACAATTGGACAGCCTAATCTGCCTAGAAAGCAGCATTTTTGA
A_24_P94402	0.085619	0.00277	-3.75248	-1.53707	-0.980719	A_24_P94402	NM_005378	GTTAATCTCTGTTATGTACTGTACTAATTCTTACACTGCCTGTATACTTTAGTATGACGC
A_23_P114299	0.129446	0.0062	3.31425	-2.30966	1.14515	A_23_P114299	NM_001504	GTGACTGTGGCCATGGTCCCCAAGACCTCTATATTTGCTCTTTTATTTTTATGTCTAAAA
A_33_P3328569	0.272085	0.0324	2.41923	-3.87007	1.14524	A_33_P3328569		AGACTTCCTATGTACCCCTCATCCAATTTGTTCTAATGTCACTATCTTAGCATCTTACAT
A_23_P153745	0.02608	0.000272	5.08321	0.69895	1.14574	A_23_P153745	NM_006332	ATGAAGCCCAGATACACAAAATTCCACCCCTAGATCAAGAATCCTGCTCCACTAAGAATG
A_24_P411121	0.320553	0.049	2.1904	-4.24906	1.14586	A_24_P411121	NM_148901	TACAGTCCCAGGGGAAATTCAGTTTTGGCTTCCAGTGTATCGACTGTGCCTCGGGGACCT
A_33_P3735158	0.161685	0.00975	3.0701	-2.74134	1.14613	A_33_P3735158	AK093004	CCATGTCACTGAATATTCTTCCACAACACGATTTTAATGGATATAGTCGTCCATTGTTTA
A_33_P3265374	0.20713	0.0171	2.76702	-3.27329	1.14653	A_33_P3265374	NM_001145722	CCCCAGTCGGCTCTGGTTGTTGGCAGCTTTGGGGCTGTTTTTGAGCTTCTCATTGTGTAG
A_33_P3294159	0.086178	0.00281	-3.74579	-1.5488	-0.752826	A_33_P3294159	NM_015722	AGACACAGACAGAATACCAGCTGTCCTCCCCAGACCAGCAGAATTTCCCTGACCTGGAGG
A_33_P3248842	0.086409	0.00282	-3.74365	-1.55255	-0.926301	A_33_P3248842	NM_001251874	TGAAACAGTCTCAGAATACGGAGTCCTGATCTTCATTTATGGATGGCCCTTTCTCCAGAC
A_33_P3373403	0.092991	0.00322	3.67059	-1.68078	1.14678	A_33_P3373403	NM_016274	TTGAGGAGGACAGCTATCTTGCCCATCCCACTCGAGACAGGGCAAAAATCCAGCACTCCC
A_23_P210726	0.278567	0.0341	2.39177	-3.91624	1.14748	A_23_P210726	NM_021873	CTATTTCAGTGTTACCTGTGTGCTTGGTCTGTTTGACTTTACGCCCATCTCAGGACACTT
A_23_P27528	0.08657	0.00283	-3.74133	-1.55663	-0.881267	A_23_P27528	NM_000764	CATGAGTTTGGCCCGCAGGGTTAAAAAGGACACCAAGTTTCGGGATTTTTTCCTCCCTAA
A_23_P48698	0.116561	0.00496	3.43547	-2.09529	1.14782	A_23_P48698	NM_003814	ACATGGAAGGATTAAATGTGATGGGAAAGTTGCGTTACCTGTCACTATTGTGCCTTCTTC
A_23_P422115	0.104482	0.00408	3.54132	-1.90838	1.14791	A_23_P422115	NM_001048265	CACAGACTGCGCTGCCTTCCCTGAAAATATTATTCGTCTGCGGAGTAGGAAAATATGCAA
A_23_P99942	0.053471	0.00106	4.28709	-0.61299	1.14976	A_23_P99942	NM_024652	CAGAGGCACACATTCTGAGTGCACCCGCTTAGCCTTTACATTCCTCTCCACCGACAAAAG
A_33_P3489646	0.08823	0.00293	3.72194	-1.59062	1.15037	A_33_P3489646	NM_001080547	ACCCGGGGTACTGCCTTGGGAGTCTCAAGTCCGTATGTAAATCAGATCTCCCCTCTCACC
A_33_P3298587	0.0875	0.00288	3.7326	-1.57192	0.796717	A_33_P3298587	NM_014963	CGCCTGCGGTTTCTATGTATTTATAGCAAGTTCTGATGTACATATGTAAAGGACTTTTTT
A_33_P3309481	0.19869	0.015	2.83625	-3.15246	1.15223	A_33_P3309481	NR_002930	CCTCCACTGGGCCCTGTGCTGCAAAGGTAAAGGGTCTTGGAATAAAGACCTGTGGCCAAG
A_32_P187663	0.087603	0.00288	-3.73138	-1.57406	-0.708262	A_32_P187663	NM_001042416	ATGTGGGAAAGCCTTCAGTAAAAGTTCTAACCTTAGACGACATGAGATGATTCACACTAG
A_24_P317835	0.08775	0.00289	3.72997	-1.57653	0.650886	A_24_P317835	NM_019892	TCTTGCTTTGTGTCCCATTCCATCTCTTGAAAAAATGTAGTCTTTGAATGTGTGAAAATC
A_24_P236445	0.088071	0.00291	-3.72712	-1.58153	-0.663026	A_24_P236445	NM_006141	AGAATGATAATTGTGGTATAGTGACCAATAGATGCCAAACAGCTTGTGGCCTCACTAAAG
A_23_P89215	0.088071	0.00291	-3.72699	-1.58176	-0.829498	A_23_P89215	NM_022158	CTACAGGTGAAGATCCCGGATCTGTTTTGTGGCCTAGAGATTGTCCCCGCGTTGCTCCAC
A_23_P38618	0.088109	0.00291	3.72609	-1.58334	0.806864	A_23_P38618	NM_004278	GCTAGCTTCTCAAGTTCTTGTGAAAAACAATTTACATAATGACACAGTAGATGTGGAACA
A_23_P116602	0.088109	0.00291	3.72578	-1.58388	0.48795	A_23_P116602	NM_020798	TGCTGTAGCCCCCTTCTAACTTCTAACCGAAGACAAGACAGACACCCATGTTCTTAAATA
A_33_P3323760	0.123011	0.0055	3.37903	-2.19508	1.15293	A_33_P3323760	NR_015447	TCTCTCACACTTTTCAGTCAAGAGTGGGGCTATAAACTCCTTCCTCATAGGAAATAAGGA
A_23_P20196	0.256128	0.0275	2.5099	-3.7165	1.15385	A_23_P20196	NM_005720	AACTGATGTTCGAATCCAGCAGTAGCTGCGGCTGGGTACATGGCGTCTGTTTCTCAGCCA
A_24_P304154	0.029763	0.00034	4.94934	0.48465	1.15403	A_24_P304154	NM_001025390	AAAGCATTTTTAAAGATTAATCTGAATTAAGCTTTATCAGTGTACTCTTTATCTGTGTTA
A_33_P3403418	0.08823	0.00293	-3.72262	-1.58943	-0.427951	A_33_P3403418	NM_001903	CAAAAATACATCGGATGTCATCAGTGCTGCCAAGAAAATTGCTGAGGCAGGATCCAGGAT
A_33_P3372332	0.161895	0.00978	3.06832	-2.7445	1.15474	A_33_P3372332	NM_000101	TGGTGAAGCTGTTCGGGCCCTTTACCAGGAATTACTATGTTCGGGCCGTCCTGCATCTCC
A_23_P128574	0.237266	0.0231	2.60378	-3.55587	1.15533	A_23_P128574	NM_017993	GACAGATCTGTTTCCTATGAAAACCAAACAATGATTCCACAGTCATAATGATGGCAAAAT
A_23_P150768	0.017294	0.000119	5.59208	1.48826	1.15549	A_23_P150768	NM_007256	TGCTGGTTGGTATCTGTAAATGTTTAATAAATATCTGAGCATGTATCTATCAACGCCAAG
A_33_P3246593	0.229777	0.0217	2.63736	-3.49804	1.15693	A_33_P3246593	NM_001010906	CCTGCAGGAGAAAATGACAGAAATTGGGATAAGAAGTGGCTGGAAATATGATAGCTGCAA
A_33_P3233436	0.119451	0.00519	3.41058	-2.13928	1.15704	A_33_P3233436	NM_001170944	AGTGGACACTCATCCCGTGACAGCGATGGTGACCATGACTGTGGGAGAAAGAACAGGACC
A_33_P3364348	0.241313	0.024	2.58331	-3.59103	1.15811	A_33_P3364348	NM_020647	CTTGCTGTGAAAAAGAACTCCCTACCTGTGAGTTCCTTTATTTATAATTCTTGAAACCAA
A_33_P3257042	0.088311	0.00295	-3.71876	-1.5962	-0.70351	A_33_P3257042	NM_001193552	GATTGTAAAGAATGTGGAAAATCTTTTACTTCTCGCTCAGCACTAATTCAACATCAGCGA
A_23_P385911	0.053274	0.00105	4.29364	-0.60184	1.15822	A_23_P385911	NM_001145314	AAGGCCAAGACCATCTTTTGTACCGTTGGTACAGTAGGCTAAAGGTACGGTGTTCCATAT
A_24_P592012	0.189945	0.0135	2.89456	-3.05032	1.15884	A_24_P592012	NM_025224	TGACTTCCTATTACTTATTATAAACCTGTGTTTGTATTGGAGATGTGTCTACTATTGGGG
A_24_P289178	0.082443	0.00261	3.78661	-1.47733	1.15931	A_24_P289178	NM_206967	CCCCAGGGCTGTGCAAACACATGCCCCTGCCATAAGCACCAACAAGAACTTCTTGCAGGT
A_33_P3234580	0.309922	0.0443	2.24743	-4.1559	1.15981	A_33_P3234580	NM_000050	GCAGCTGCGGTGGGGAGCTATAAAAATGACAATTAAAAGAGACACTAGTCTTTTATTTCT
A_23_P67864	0.08823	0.00293	3.72163	-1.59116	1.15991	A_23_P67864	NM_004036	TGGTGTTCCTGATCATCTTGAAAGGTTCTTCTGGAACTCCTGTCCCCTTAGTCATGAGAA
A_33_P3333810	0.088896	0.00299	-3.712	-1.60806	-0.513988	A_33_P3333810	NM_003350	GTACCTTGCCAGGGAAGCAAAAATTGGAATTATTGTAGCTTTTCATGTATACACACTTTT
A_24_P236799	0.088896	0.00299	3.71145	-1.60902	0.954204	A_24_P236799	NM_006868	ATTAAAGAGCTCTGAACTGTATTCAGACCGACTGGGTATCTAGCTTACTGTTTTAACATC
A_33_P3413989	0.211664	0.0182	2.73458	-3.32973	1.16031	A_33_P3413989	NM_000062	AGCTTGCCGACAACCAACTCAACAACCAATTCAGCCACCAAAATAACAGCTAATACCACT
A_23_P99741	0.088896	0.00299	-3.71106	-1.6097	-0.744539	A_23_P99741	NM_004196	CCCAGCTAACTGGCAGCAGCATCCTTCCAGCTTTGGATAATAAGAAGTACTACTGTGATA
A_24_P278747	0.182538	0.0125	2.93651	-2.97666	1.16055	A_24_P278747	NM_001759	ATCGGGCCATTGGATTTTTTCCATTATGTTCATCACCCTTATATCATGTACCTCAGATCT
A_33_P3261408	0.24275	0.0245	2.57255	-3.60948	1.16057	A_33_P3261408	NM_147196	ATTTGTGAATAAAGCTGATTGCCTTCTCAGAGCCAGGCCTAGAAAATGGCCTCCTGAGAT
A_23_P251499	0.320126	0.0488	2.19312	-4.24464	1.16103	A_23_P251499	NM_002593	CTCGTCCAGTTCGTCTCAGATCTCAGTGTCACCGCTGATGGCTTCTCAGCCTCCTACAAG
A_33_P3327762	0.089305	0.00301	3.70683	-1.61712	0.693395	A_33_P3327762		GCTCCAACATCTCCTTGTCCTTCCATATCTTCCCAGGTAATAAAAGAATTATTTAACTAA
A_33_P3223648	0.089574	0.00303	-3.70471	-1.62085	-0.632187	A_33_P3223648	NR_037879	GTTTGACATGGATGGGTTTTGAAATACTTAAGACACAACATAAAATTTAGTTCAGGGGTC
A_23_P337270	0.300481	0.041	2.28978	-4.08615	1.1613	A_23_P337270	AK057247	TGTGCTGGAGTATATGACAGCTGCGGTACTTGAGGGCTTCATTGCCAGAACACATTATAT
A_23_P379200	0.079938	0.00243	3.8256	-1.40916	1.16214	A_23_P379200	NM_175736	GGCAAAACAGTACTTCAAAGAAATGTATATGCAGTGAGACATTTCTAGCTTTATTTCCAG
A_33_P3411980	0.246894	0.0254	2.55254	-3.64374	1.16321	A_33_P3411980	AL833204	TCAAGTCCTGAAGTACCTCAGAACAAATCGGGTAAATGTATGAATCCTTGGCTTAAGTAG
A_33_P3397763	0.067153	0.00168	4.02928	-1.05517	1.1633	A_33_P3397763	NM_003811	CGGTATTGCTATGTTGCCAAGGTTGTTTACATGCCAGTACAATTTATAATAAACACTCAT
A_33_P3220919	0.06656	0.00165	4.03947	-1.03755	1.165	A_33_P3220919	NM_005160	CAGTTACTTTGGAGCTGCTAGACTGGTTTTCTGTGTTGGTAAATTGCCTATATAAATCTG
A_23_P161076	0.071043	0.00188	3.9669	-1.16319	1.16555	A_23_P161076	NM_001767	GAGTTTCTTATGTGCCCTGGTGGACACTTGCCCACCATCCTGTGAGTAAAAGTGAAATAA
A_24_P928510	0.251189	0.0263	2.53443	-3.67468	1.16607	A_24_P928510	NM_053055	TAACCCAGGCTGTACTGTTGTTTCTTACCAACAGCATAGGTTTTCATCACTGGAAGGAGC
A_33_P3331511	0.070964	0.00187	3.97122	-1.15569	1.1679	A_33_P3331511	NR_027345	AGTGTGGCTTTGAGAAAATAAAATGGCCACCTTGCTCCGCTGTTCTTTCTTTGTAAAAAA
A_23_P81770	0.09084	0.00309	-3.69275	-1.64184	-0.62063	A_23_P81770	NM_003463	AATGGTGATGTGTATTAATGTTAGTTCAACCATATATTTATACTGTCTGGGGATGTGTGG
A_33_P3347772	0.28443	0.0358	2.36515	-3.96082	1.16872	A_33_P3347772	AK025163	ATGCTCCCCCATGCCCAGGGATCTGCATTTGTTTACTTAATATACTTCATAAATTTATAG
A_23_P79251	0.206183	0.0165	2.78514	-3.24172	1.17078	A_23_P79251	NM_014600	CTCACACACTTGTCTGTGCTATGATGTATGCAGGATCCCAGCATTGATACCCAATGACAA
A_33_P3225983	0.091513	0.00312	3.68729	-1.65143	0.862537	A_33_P3225983		GCCACAAGAATAACGGGCGGTGGGAAATCTGGAACAGGTAATTTAGCAATATACATTTAA
A_24_P380330	0.091652	0.00313	-3.68573	-1.65417	-0.793976	A_24_P380330	NM_024594	GAAGTTGTGTCTTAGGCAACTTTATCAGTATCAATGGAAAAATGATAGGCACTACAATGA
A_33_P3419567	0.079783	0.00239	3.83525	-1.39231	1.17088	A_33_P3419567	NM_001136566	GGAGTGCATACACTTCTGTCAACTGCTGCCCAGGATTTGATTCATGCTGAACTGAAAATG
A_33_P3408953	0.282503	0.0353	2.37315	-3.94745	1.17215	A_33_P3408953	NM_199127	ATCACACCCAGATCGCATCCACCTTCATCGCTGTGGTGCAAGCCATCGTCCGCACGGCTG
A_33_P3410589	0.086907	0.00284	3.7387	-1.56123	1.17339	A_33_P3410589	NM_153690	TAGCACTGTTCTGGTTCTGTTTGCACGCCAGTGGGGAGAGAATAAAGAGGAAAATTTAAC
A_33_P3555937	0.309922	0.0443	2.24731	-4.1561	1.17345	A_33_P3555937	NM_001205315	CTTGGATTTCACTTGCATTGTGCAATAAGCAAAGAAGGGTTGATAAAAGTTCTTGATCAA
A_33_P3296181	0.052415	0.00102	4.31098	-0.5724	1.17359	A_33_P3296181	NM_001001437	AAGAGTAGTCAGTCCCTTCTTGGCTCTGCTGACACTCGAGCCCACATTCCATCACCTGCT
A_33_P3365312	0.264582	0.0302	2.45835	-3.80402	1.17577	A_33_P3365312	XM_931148	AGCGAAGGCAACTCATGATTCTGCCTCAGAAGCAATCGAATAAAATATTTTGAAAATGAA
A_23_P45560	0.219754	0.0196	2.69433	-3.39957	1.17586	A_23_P45560	NM_000273	ATATTCCTCAGACTCAACAATTCTTGTTCTTTAGAACTGTGTTCTCACCTTCCCAACACT
A_23_P167841	0.091955	0.00316	-3.68044	-1.66346	-0.776738	A_23_P167841	NM_019842	AGCATTTGTAAGGCAGGAGAAAGTACAGATGCCCTCAGCTTGCCTCATGTCAAACTGAAA
A_23_P33791	0.091974	0.00317	-3.67986	-1.66449	-0.683358	A_23_P33791	NM_012446	TGTGATCCATTACCAAGTCTCCTCATGAAAACCACAGTGAGTCAGCCCTTCACAGAACTA
A_33_P3331726	0.09208	0.00318	-3.6781	-1.66757	-0.452119	A_33_P3331726	NR_027451	CATCTAGTCTCTAGATGTTAAAGAGGTTGCCAGTGTATGACAAAGTAGTAAAATTAGCAT
A_33_P3350778	0.09208	0.00318	-3.67785	-1.66802	-0.69494	A_33_P3350778	NM_198535	CTCATCGTTTTGAAGATTTGAGGACACTTTAGAGAAACCCTGTGTATGTAAGTCATGTGC
A_32_P47754	0.066636	0.00166	4.0365	-1.04268	1.17598	A_32_P47754	BC060766	TTCACGTCAACTTCTGGCTCCTCAGTTTGGCAGTAAGGCAGGGAAGTTGTTTTCCTATTT
A_24_P383523	0.092441	0.0032	3.67484	-1.6733	0.903569	A_24_P383523	NM_015589	CCATCTTCAGGGTTGCACAGAATCCTCCAAGATACTTTGCAGCCTTTTTTCCCCCTGGTC
A_23_P384698	0.092441	0.0032	3.6747	-1.67356	0.596622	A_23_P384698	XR_110030	CACCTCACTTGACAAGGAGATACAAAACTATCAGTTCATAGACACCATCTGATAGGGAAC
A_33_P3314031	0.169327	0.0108	3.01338	-2.84138	1.17658	A_33_P3314031	NM_152680	CCTCTGTTATGGAAATTGAAATGGAAGAGCTTGATAAATGGATGAACAGCATGAATAGAA
A_23_P137097	0.287051	0.0364	2.35551	-3.97694	1.17669	A_23_P137097	NM_006517	CATAATATGGTGGGATATCAATTTACTTCTTCCACACATGTGGTTGTGCACATGTGAGCT
A_23_P26124	0.079922	0.00243	3.82625	-1.40803	1.17686	A_23_P26124	NM_134260	CCTCCATTATACAAGGAGTTGTTCACTTCAGAATTTGAGCCAGCAATGCAAATTGATGGG
A_23_P418234	0.310954	0.0449	2.23923	-4.16936	1.17755	A_23_P418234	NM_015020	CCATAGTTGGGGTAAGCACTTCCTAGATTGAGAAAAAGCAGCTACAGTCAATCCTGCTCT
A_33_P3409665	0.115618	0.00489	3.44278	-2.08237	1.17809	A_33_P3409665	NM_001007188	GGGTCAAAAGGGTTTATTTCCTTATGATTTCCATTTGTGCCATATATAAAACAACCTCTG
A_33_P3227077	0.093449	0.00325	-3.66578	-1.68923	-0.913832	A_33_P3227077	AK090403	GGACCCCTCCATTTGGTGCCTCAGAGAAACCTTGCACTCCATAGATCTGACTCTGAACCC
A_23_P329198	0.088311	0.00295	3.71872	-1.59627	1.17905	A_23_P329198	NM_001031716	ACATGTCATAAGTGGTACCCACTTCCCCTTTTTACTGTAGGGTGGATAACTCTTAGGATT
A_33_P3302881	0.093476	0.00325	-3.66483	-1.6909	-0.760376	A_33_P3302881	NM_001003760	AACAACGTGACTCGGGAATCCCGGGCCAGTTCGGTATCTTCTGTGCCAGTCAGTATCTGA
A_23_P98205	0.079024	0.00233	3.8482	-1.36971	1.1799	A_23_P98205	NM_003654	TGCCCCTTTTTTGTCTCTGAAATTTGCACTACGTCTTGGACGGGAATCACTGGGGCAGAG
A_23_P361569	0.093476	0.00326	-3.66373	-1.69283	-0.558235	A_23_P361569	NM_025181	AGGAGGATGGAGCTAGTTAGCTGTCTGTTGTCTGTAGCCCAGCTTGATAATGGAACTATA
A_23_P5983	0.104692	0.00409	3.53982	-1.91103	1.17996	A_23_P5983	NM_006227	GATTCCTCACCATCGGGGCTGATCTCCACTTTGCCAAAGGGCTGCGAGAGGTGATTGAGA
A_23_P1904	0.309315	0.044	2.25109	-4.1499	1.18057	A_23_P1904	NM_000139	TCAATGTCATCTTCTCCATGAAGACCACTGAATGAACACCTTTTCATCCAGCCTTAATTT
A_33_P3285018	0.093898	0.00328	-3.6599	-1.69957	-0.993407	A_33_P3285018		CGCTACAACCATTGCAAATCATTGAAGAATCCATAATGAATAGAGATCTTACAAGTGTAG
A_33_P3380098	0.093898	0.00329	-3.65974	-1.69984	-0.882457	A_33_P3380098	NM_001243756	CCTGGAGAACTATATCTCAGCCCTCAACACGCTGTGGCATCCTGAGTGCTTTGTGTGCCG
A_32_P67623	0.093908	0.00329	3.65923	-1.70074	0.931301	A_32_P67623	NM_017848	ATGCCTCAGGAGTTGTTCTGTGATGGAAATTGGTCTGTTGTTCTGTTAATGCTGATGGAA
A_23_P206441	0.094053	0.0033	3.65793	-1.70303	0.780776	A_23_P206441	NM_000135	ATGAGGGCCTCGTTTATTAAGATCTTTAAACTGCTTTATACACTGTCACGTGGCTTCATC
A_23_P321201	0.176866	0.0118	2.9679	-2.92147	1.18078	A_23_P321201	NM_015213	CGGGATGTGTCATCGTGCCAAATACCACATTTCCTGTTGGCACAGTTTCACAGAAGTAAA
A_33_P3361442	0.094324	0.00331	-3.65544	-1.70741	-0.672244	A_33_P3361442	NM_018111	TAAAGGTTGGATTTCAAGGCGGGGGCTGCTTCCGGAAAGACGCGCTGTGTTTGGAAGGTG
A_33_P3259662	0.094337	0.00331	-3.6549	-1.70834	-0.987042	A_33_P3259662	NM_003435	ACACTGAGTCAAAGCCGTTTGAGTGCATTGAATGCGGGAAATTCTTTAGTCGAAGTTCTG
A_33_P3374394	0.095167	0.00335	-3.64966	-1.71757	-0.940838	A_33_P3374394	NM_001039675	TCTACAACCTACTGGTTGTGACCCTGATGACCGTAGACCTCGTGCACTTCTGCTGCGGTC
A_23_P372848	0.043847	0.000694	4.53144	-0.20111	1.1808	A_23_P372848	NM_002558	ACAACCCAGTGTACACACCACCTACGTGCACACAGCATCCTTCCACACTGTGTATGTGAA
A_23_P4592	0.320553	0.049	2.1911	-4.24793	1.18163	A_23_P4592	NM_001245	CTCTGAGTGTGTTTGTGTCCTAATCTTCTCTTCTTATAAAGACACTAGTCATATTGGATT
A_23_P209360	0.136663	0.00705	3.24512	-2.43198	1.18171	A_23_P209360	NM_052920	ACACAGATGACATTGAAATTCGTTTCTCTCCTCATCTATCACACTGGAGCAAAACTGGCT
A_23_P108342	0.095628	0.00337	-3.64519	-1.72542	-0.651154	A_23_P108342	NM_016536	AAGACTTTAGATGTCCTTCACAACTTACTCAACATACAAGGCTTCATAATTGAGAAAGCC
A_23_P422044	0.096013	0.00339	-3.64219	-1.7307	-0.81856	A_23_P422044	NM_032009	CTGATTTTCCCCCAGCCCAACTATGCGGACACGCTCATCAGCCAGGAGAGCTGTGAGAAA
A_23_P421811	0.320553	0.049	2.19093	-4.24819	1.18181	A_23_P421811	NM_152503	AGAATTCCAGTCTTGAGAAACAGGTCAAGGACAGCTTCAAAAGAGATTCTAAATAAATGT
A_32_P310335	0.275254	0.0333	2.4045	-3.89485	1.18227	A_32_P310335	AK056079	TTTTTAGTTGGAGGTTTGACCTAAGTCTGGACCAATTGATTGCTTTTCAATACAACTTTG
A_24_P388786	0.282548	0.0353	2.37279	-3.94804	1.18244	A_24_P388786	NM_001369	TCTGTGGACCAGGATCATTATTTCATGCTCATGATCATGAGAGTTAGGACTGAGTGGCTC
A_23_P143713	0.014771	8.57e-05	5.80124	1.80083	1.18298	A_23_P143713	NM_021822	CAGCACTGTTGGAGCAAGTTCGTGTACAGCCAAAGAGAGCTATTTGAGCCTTGGAATAAT
A_24_P11462	0.211568	0.0181	2.73556	-3.32802	1.18393	A_24_P11462	NM_052998	ACCTGCAGTGTTTCTGCCCTGTAAATAGGACCAGTCTTACACTCGCTGTAGTTCAAGTAT
A_23_P215060	0.167436	0.0106	3.02564	-2.81977	1.18411	A_23_P215060	NM_001018111	CAGGAACTGGGGGATCATATATGTCTTAGTGGACAGGGGTCTGAAGTACACTGGAATTTA
A_33_P3567512	0.096527	0.00343	-3.63617	-1.74128	-0.807446	A_33_P3567512	BC125059	ACAAGTTCAAATATGGCGATGTAGAAAGGAGATTCTACGAACAGATGAACGGGCCTGTGG
A_33_P3263417	0.019921	0.000164	5.39384	1.1856	1.18483	A_33_P3263417	NR_015431	TTGTGCTCCAGGAACCTACGCACTATATATATAAATAAAGCTTAAGTAAACATCACTGCA
A_23_P39766	0.058642	0.00127	4.18524	-0.78681	1.18567	A_23_P39766	NM_014905	TTCAGTGTTACTGGAGTTTTCTTCATTGTGCACACAGGACAAATCTGATCTCTTTGGGAA
A_23_P41145	0.024555	0.000243	5.15248	0.80876	1.18804	A_23_P41145	NM_138805	AAGACCAGCCTCAGAGGGTCCTTCTGGAACCAGCTGTCTGTGGAGAGAATGGGGTGCTTT
A_23_P39386	0.030062	0.000347	4.93731	0.46525	1.19004	A_23_P39386	NM_014266	TGACCCTCCTGCAGCTTGGACCTTTGACTTCTGACCCTCTCATCCTGGATGGTGTGTGGT
A_23_P118095	0.096759	0.00345	-3.63252	-1.74772	-0.90367	A_23_P118095	NM_005061	TTGCTGGTACCAAGAAGCGGGTCATTACGCTGAGAAAGTCCCTCCTGGTGCATCACAGTC
A_24_P350759	0.104482	0.00406	3.54365	-1.90427	1.19061	A_24_P350759	NM_004171	TGTATGTCCAGAACAAAAGATAAAACTAATTGTATTCCTCACATTCACAATCCCCATTGG
A_33_P3412418	0.097058	0.00347	-3.62982	-1.75247	-0.789607	A_33_P3412418	AK097799	GAGTTCTAAATCATGGGACTGTTGACACCCTTTTGAACTAAAGAATTTGTAACAATTTGG
A_23_P41455	0.18439	0.0128	2.92498	-2.99693	1.19105	A_23_P41455	NM_003305	GACAGGGACCATGTCTTATTCATCTTTGTGTCTCCAGCATCTAGTACAGTGCCTGGTATA
A_23_P103256	0.090392	0.00307	3.69735	-1.63376	1.19134	A_23_P103256	NM_021023	TCAGGAAGTTACTGGGATTACATTCATTGCACACAAAATGGGTGGTCACCAGCAGTACCA
A_33_P3418833	0.079847	0.00239	3.83422	-1.39412	1.19168	A_33_P3418833	NM_198391	CCAGCACATTAGTCCTAAACGTCCCATGTATTTTTCTAGGCATAAAAATAAAAGTTGGCT
A_23_P254271	0.262375	0.0293	2.47468	-3.77636	1.19188	A_23_P254271	NM_032525	AAGCCTGAAATTGTGCCGTGTTGCCTTATATGAATATGCAGTATGGGACTTTGAAATAAT
A_33_P3374117	0.097493	0.0035	-3.62563	-1.75983	-0.948774	A_33_P3374117	BU656309	CCTCTTCTACTGGAAGCTGCTGGCTGTGCATGTGCATCTGGGTTTCATTATCGCCTTCGA
A_24_P125561	0.106967	0.00428	3.51535	-1.9542	1.19259	A_24_P125561	NM_014441	CTCTCAGCAGGTCTACCTGAACGTCTCCCTGCAGAGCAAAGCCACATCAGGAGTGACTCA
A_23_P202219	0.065002	0.00157	4.06673	-0.9905	1.19274	A_23_P202219	NM_015916	TTTTAAAAAACTGTTATCTTCTTGGCCAGGGGAAAGGACCACAAGGCAATCTGGGGTGTG
A_23_P75769	0.06451	0.00155	4.07428	-0.97747	1.19367	A_23_P75769	NM_024021	CACCAAAAGATCAACAGACAAATGCTCCAGAAATCTATGCTGACTGTGACACAAGAGCCT
A_23_P23829	0.251111	0.0262	2.53476	-3.67412	1.19374	A_23_P23829	NM_001773	TCCCTGTATTTTCTTTCTCTACTTTGAGGAAACCAAAGTAACCTTTTGCACCTGCTCTCT
A_23_P1173	0.320553	0.0491	2.1903	-4.24921	1.19517	A_23_P1173	NM_004132	AACCCAAGGAATGATGGAATCAACACAACATAGTATGTTTGCTTTCCTTACCCAATTGTA
A_23_P207879	0.206183	0.0167	2.78135	-3.24832	1.1953	A_23_P207879	NM_024110	GCAGAGGCATAAGCCCACATATGCTGTGACGCTGGCCACCTTTTCTCAGCTTCTGAGGCT
A_23_P152082	0.310665	0.0448	2.24087	-4.16666	1.19631	A_23_P152082	NM_016642	CTGAGCCCAAAACTCAAAGCCAAACCTGTCAGCTCTCTGAATGAGTGCACGACCAAGGAT
A_33_P3407266	0.098222	0.00355	-3.61766	-1.77386	-0.554122	A_33_P3407266	NM_012204	TGGCTCAAAAACAGAAGTTGCTGAGTGCAAGGAGAAATTCGCCGCCTCCAAGGACCCCAC
A_33_P3308332	0.125849	0.00582	3.34875	-2.24864	1.19697	A_33_P3308332	NM_021200	TAAAGCTCCCCTGTAAATGGGGGCTCCATTAGTTCTGCTGCCGAGACTAATAAAGATTTG
A_33_P3226060	0.248143	0.0257	2.54631	-3.65439	1.19717	A_33_P3226060	NM_001195278	CAACCTGTCCCGAGGACCAACTACCCTAAATCCAGACCCGAGAATGGGACAGTGTGCTAA
A_23_P138168	0.09833	0.00357	3.61484	-1.77883	0.731669	A_23_P138168	NM_001839	CGACCAAGGCATTGATTATTAGATCCACACAGAAGGAGCTCAGTATTTAGTCCTTTGTTT
A_24_P417460	0.136293	0.00698	3.24997	-2.42339	1.19721	A_24_P417460	NM_001029880	CAACTGGATGGTTTTTGATTGAAGCCTAGAACATCTGTAGAGACAAACTCTACCCAGTCT
A_23_P116512	0.136502	0.00701	3.24822	-2.4265	1.19775	A_23_P116512	NM_024841	ATGACTGTTAGCCAGTTTACAACTTTTTACCATCGATGTACACATTTGATATTTGTGCAG
A_23_P4536	0.09833	0.00357	3.61399	-1.78032	0.943903	A_23_P4536	NM_012307	AGTCATGCAAACCGTTAGGAAAACCAGAGCCTATATGGAGTTCCCTCTTCTAACCCAACT
A_23_P92107	0.149907	0.00845	3.1474	-2.6048	1.19882	A_23_P92107	NM_021082	ATACCCTGCAGTGCACTGTAGAACAGAAGATAAGAACTTTTCTCTGAATTTGGGTCTTCT
A_24_P248741	0.09833	0.00358	-3.61335	-1.78145	-0.89566	A_24_P248741	NM_145044	GCAGCAGGTGATTAGGAGAAGGCATATGACAGTAGAGAGGACTGGAATATAGAGGAGAAT
A_23_P407565	0.1347	0.00676	3.26787	-2.39174	1.19947	A_23_P407565	NM_001337	AGTCATGTTCCTTCAAGATCATGTACCCCAATTTACTTGCCATTACTCAATTGATAAACA
A_33_P3275653	0.09833	0.00358	-3.6122	-1.78348	-0.867406	A_33_P3275653	NM_000842	TGACAAGACTCTGTTCAAATATTTCATGAGGGTTGTGCCTTCAGATGCTCAGCAGGCAAG
A_23_P39364	0.204711	0.0162	2.79503	-3.22446	1.19966	A_23_P39364	NM_004838	TGGCAGCTTTGGGGCTGTTTTTGAGCTTCTCATTGTGTAGAATTTCTAGATCCCCCGATT
A_23_P434398	0.271015	0.0319	2.42763	-3.85592	1.20215	A_23_P434398	NM_153235	GAAACACATTACTCACAGCCATGTATATCTTGGACAGAGTTTCAGATGGAATGACTTGTC
A_33_P3417358	0.238936	0.0235	2.59587	-3.56946	1.2037	A_33_P3417358	BC080646	ATAGAAGGAAGGCCAGTGGCCACGAGGGACAATCTTGGTCTTGGGAGATCCTGGAAATGA
A_23_P321377	0.145329	0.00793	3.18181	-2.54396	1.20429	A_23_P321377	NM_152374	AAGCTTCTGATGAAAAGCAATGTATGTTTATAAGCTTGCAAGTAACAGACAAGATGTTCC
A_32_P331052	0.09833	0.00359	-3.61067	-1.78617	-0.76961	A_32_P331052	NM_080833	GAGCCTGGGGACAAAGCCTCCAAAAAGCCATCCAGAGGGAGAAGGAAACTGACAGCCACT
A_24_P50950	0.297733	0.0403	2.30004	-4.06917	1.20846	A_24_P50950	AK095289	TCAGGGAGCTCACAGGACAGTCAGGATAGAGGCAAGAAAACAGGTGACAATAACTAGGTG
A_33_P3391865	0.09833	0.0036	-3.60992	-1.7875	-0.955692	A_33_P3391865	NM_001031714	GGCCGGGCCTCAAAGGGGACCGGGAAGCGAAGGAAGAAGCGTCCCTCCAGGAGCCAGGAA
A_33_P3366484	0.098381	0.0036	-3.60919	-1.78877	-0.73187	A_33_P3366484	NM_198047	TGCAGCAGAAGAGGTGCTATTGGAAAAAAAAGGTTGCACGGGAGTCATAACACTAAACAG
A_23_P128663	0.079871	0.00242	3.8286	-1.40392	1.20915	A_23_P128663	NM_014363	TTTACTTTTATTGGGAATAAGGAATGTTTGCACCTCCACATTTTATTGCTTCTGGATGTG
A_23_P429977	0.138272	0.00718	3.23544	-2.44911	1.21011	A_23_P429977	NM_000218	AAATCAATAATTTGTGGTGATTTGGATCTGTGTTTTAATGAGTTTCACAGTGTGATTTTG
A_33_P3343720	0.271573	0.0321	2.4244	-3.86137	1.21015	A_33_P3343720	NM_005747	CTTCATCTGGAAGCCCACGGTGTTCACTCGAGTCTCCGCCTTCATCGACTGGATTGAGGA
A_33_P3243519	0.099021	0.00364	3.60391	-1.79807	0.619355	A_33_P3243519	NM_001164387	AAGGATGCCACTGACCCAGTTTATAAAACTGTCACTTCAAGTACAGAAAAGGGCTTGATT
A_33_P3292739	0.099119	0.00365	-3.60293	-1.79979	-0.960313	A_33_P3292739	NM_201402	ACGTCAGAAAAGTCGAAGGTACCCTGCCTCCCAACGTACTTGTGATTCATCAATCGAAAT
A_33_P3313730	0.156073	0.00914	3.10516	-2.67944	1.21065	A_33_P3313730	NM_001145855	GGGTGTATAGTTATGGCCTTAATTTGCATTTAGCTAATTACCAAGGAGATTGAGCATATT
A_24_P305223	0.099202	0.00365	-3.60161	-1.80213	-0.623913	A_24_P305223	NM_172241	CTAATTGTGCTAGACTCTCTGGACCAGCAGAACTCAGAAGTTTTAATATGCCTTCTTTGG
A_23_P374695	0.208068	0.0172	2.76252	-3.28114	1.21213	A_23_P374695	NM_000459	AAAGTTTTAGTTTTGATGAGTTGTGAGTTTACCTTGTATACTGTAGGCACACTTTGCACT
A_32_P2634	0.099272	0.00366	-3.60035	-1.80434	-0.592703	A_32_P2634	CR604707	GAATGGACTATGGCTGGATTGGGAGTCCACTTCCTCCTCTGTAAAGATGACAGACGAGGG
A_33_P3404052	0.099366	0.00367	3.59941	-1.806	0.821528	A_33_P3404052	NM_014350	CCCCACTTACAAAAACTATGTGATGGTATCAACAAAATGTTGGATGAAGAGAACATATGA
A_33_P3422802	0.083935	0.00269	3.76859	-1.50887	1.21385	A_33_P3422802	NM_025218	CTCTGCACTATGAACCCAAACCCAGCTCAAAAAGATAAAATCTAGTCATTTAAGATAATC
A_23_P129856	0.208745	0.0174	2.75645	-3.2917	1.21454	A_23_P129856	NM_006497	TGATAATGTGAAGTTCCTCATTTTGCACAAGTGGCACTAGCCCCAGGGCCAACCCTTCCT
A_24_P655849	0.055187	0.00113	4.25264	-0.67165	1.21504	A_24_P655849	NM_001127217	GCTAGATGATATTTTAATAGCTGCGAGTGCTTTGGAACTATAAAGATGTCACTACTTAAC
A_23_P212497	0.176289	0.0117	2.97108	-2.91587	1.21636	A_23_P212497	NM_032169	GAGCACAGGGTTAATTATTCATTTGTGGTAAAGATTATAGCATCTATTTTGATCAGTGGG
A_23_P36120	0.09084	0.00309	3.69305	-1.64132	1.21957	A_23_P36120	NM_022349	CTCCAAATTTTACCCAAGTGACTTCTACACTGTTGAACTCTGCTTACCCATTCATAGGAC
A_23_P217428	0.099765	0.0037	-3.59462	-1.81443	-0.932364	A_23_P217428	NM_013427	TGTTCTACCGTACTTTAGTAGTTTGAAGTTTTCAAGTGCATAACTATTTTTGACCAGCAG
A_33_P3367247	0.082498	0.00262	3.78483	-1.48044	1.22561	A_33_P3367247	NM_001114395	GGTTTACCCAAGTATTTAGGTGTGCTAACTGACTCAGCAGCAATAATTTAATCTACTAAT
A_23_P34537	0.100134	0.00372	-3.59175	-1.81949	-0.763482	A_23_P34537	NM_000120	CCCTTTTGAGCTATTGCACACGCCTGAAAAGTGGGTGAGGTTCAAGTACCCAAAGCTCAT
A_24_P215765	0.067982	0.00174	4.01146	-1.08598	1.22582	A_24_P215765	NM_024490	TGTAGGTATTACATCCCTGGTGTCGTATTTTGCCTGTTAAATCGTAACAAGCAATAAACA
A_32_P170397	0.246928	0.0254	2.5519	-3.64483	1.22603	A_32_P170397	AK057625	CTGTTTGGCCACGACTGATTGCAGCCCCTGGTGAAATGAGAACCCTGTGGGTCGGAACAA
A_33_P3315504	0.100364	0.00374	3.58921	-1.82397	0.429606	A_33_P3315504	NM_153332	AAGCTTCCAAAGCCCGTAAATTTGTTAATCTAGAGCAGGGGTCAGCAAACTACCACCCAT
A_33_P3309468	0.100134	0.00372	3.59186	-1.8193	1.22681	A_33_P3309468	NM_002850	GGTTTTCCCACCCCCGTGTATGTAGATATATCGACTTTGTATTAAAGGAAGATCGTCTGA
A_24_P419300	0.164349	0.0102	3.04559	-2.7846	1.22697	A_24_P419300	NR_024158	TTACAGAGTTCAATATACTGTGTACCATTGATCTTCTATTGTGAAAGCAAAGAATTTCAT
A_23_P3532	0.100556	0.00376	3.58669	-1.82839	0.598769	A_23_P3532	NM_004862	GACATATCCACAAGGTCGTAAATGCATGCTAGAAAAATAGGGCTGGATCTTATCACTGCC
A_33_P3232527	0.100556	0.00376	-3.58645	-1.82882	-0.699818	A_33_P3232527	NM_025191	GCTCGTATCGCCAACAGCTATATACATTTTGTTCCATTTTTCTGTCTTACAGAGCCATGA
A_33_P3267186	0.100597	0.00376	-3.5858	-1.82997	-0.795614	A_33_P3267186	NM_001682	ATACCTGAGGAGGAATTAGCAGAGGATGTTGAAGAGATTGATCACGCTGAAAGGGAGTTG
A_24_P205120	0.158204	0.00934	3.09316	-2.70064	1.22701	A_24_P205120	NM_199367	ACCACCTTTTTGAGTGACTTGAGCCCAAAGGCAAGCGTATATCAAACGATCTTCTCCACA
A_23_P259344	0.233262	0.0223	2.62327	-3.52232	1.22714	A_23_P259344	NM_031890	GACTAGACCCTCTCTAAAGACTGTTCCATTTTAACATGTCCTGATTCTGCATCCGTGGGT
A_24_P222835	0.100763	0.00378	3.58362	-1.83382	0.470633	A_24_P222835	NM_001017406	AAAGTCATTCCTGTTCTACAAACTAAGACCAGGACTAATGTTCCGACGTTTTCACAGTCA
A_23_P436369	0.171803	0.0111	2.99997	-2.86501	1.22776	A_23_P436369	NM_015687	CCGTGAAAGTGAACCTTCATCTGTTTGTGCCAGTTCTTTACATGTACTAATTTAAGTTTT
A_33_P3211956	0.068887	0.00178	3.99838	-1.10863	1.22858	A_33_P3211956	NM_005873	CTCTATCCCTAACCCCCCAAAAATAGGATGTCTTATTATTGAAGATATTTTTAAAGCAAA
A_23_P251132	0.169747	0.0109	3.00983	-2.84764	1.22926	A_23_P251132	NM_018968	GTCTTGCCAGAAAATACATGTACAGCAGCTAAAGGTTGTTTCTGTTGAGTGCTGAAAAAT
A_23_P53126	0.074489	0.00207	3.91424	-1.25466	1.23014	A_23_P53126	NM_005574	GATGAATCACTGTTTTTAGACACCTTCATTTTGAGGGGAGGAGTTCCACAGATTGTTTCT
A_33_P3233841	0.101029	0.0038	3.57993	-1.84032	0.384649	A_33_P3233841	NM_002184	AAACACATCTGGCCTAATGTTCCAGATCCTTCAAAGAGTCATATTGCCCAGTGGTCACCT
A_23_P348749	0.101029	0.00381	-3.57922	-1.84157	-0.765719	A_23_P348749	NM_145025	GCAATTCAGGCCACAGAAAGGTGTTAGAAGTTGTTCAAAGTGCTGTTGCATTCTTTTAAG
A_24_P648176	0.101029	0.00381	-3.57921	-1.84159	-0.727537	A_24_P648176	NM_001001660	GCGAATTTGTAATGAAAGAGCTAGAAGCTTGTGTACTTCCTTAGGAAATACAGAGCTATG
A_33_P3393048	0.281846	0.035	2.37728	-3.94053	1.23046	A_33_P3393048	AJ249379	AGGTATCTCCTGTACTACTACTCAGACTCAGATAAGGGCCAGGGCTCTGGAGTCCCCAGC
A_33_P3571254	0.270733	0.0318	2.43064	-3.85084	1.23116	A_33_P3571254	AL049782	GGCTGTCTTAATAGTGCGCCTGTTACTAATGGAATTTACTTAAAAAGTAAGTTTGCCATA
A_23_P420209	0.10135	0.00383	3.5762	-1.84688	0.775273	A_23_P420209	NM_004751	TTTGAAGAACCCTAAATCCCAACAACTGATTGAATGGGTAAAAGACACTTATAGCCCAGA
A_33_P3372869	0.101483	0.00384	-3.57507	-1.84888	-0.893309	A_33_P3372869	NM_007010	GCTATAGACAGTTGGAACATGTAGACTTGTATAAACACTGCACACTTAACCTATACTAAA
A_33_P3255274	0.101669	0.00385	-3.57364	-1.85139	-0.547247	A_33_P3255274	NM_017623	CCTGGGATGTTTCCAGTTTGGGGCTATTCCAAATAAAGCTGCTACGACTATTCATGTACA
A_23_P74581	0.101778	0.00385	3.57264	-1.85316	0.703821	A_23_P74581	NR_024127	ACATGTAAAGCTGTCCTCATTTGTGACTATGGACCTATGGAGTTGGGACAATCTCTATGG
A_33_P3321611	0.101955	0.00387	-3.57096	-1.85612	-0.716677	A_33_P3321611	NM_001048183	TTTACTTCCTCCCAAAAGACCCTTGTCCTCTTCTCATGAAGCAAGTGAAGGGCAAGCAAA
A_23_P429491	0.157986	0.00932	3.09417	-2.69885	1.23184	A_23_P429491	NM_145018	GCTTGGTCACCTGAATTGTTTTCATAAAAAGTCACCTGAACCCAATTCCTGAACTTTTAA
A_23_P217384	0.102188	0.00388	3.56863	-1.86024	0.990276	A_23_P217384	NM_003916	AAACGTGTTGCTCTCTTCACAGTATTATGTGTAAAGTCATTGTTTAAAGCACGAATGTTC
A_33_P3340869	0.102188	0.00388	-3.56838	-1.86067	-0.983788	A_33_P3340869	NR_027620	ACACATCCTCTAAACTCAAGGACTGCGTGACCGACACAATGACCCCCGAGGAGACAGAGG
A_23_P83328	0.096527	0.00343	3.63658	-1.74057	1.23331	A_23_P83328	NM_000118	GACTGTCTTCATGCGCTTGAACATCATCAGCCCTGACCTGTCTGGTTGCACAAGCAAAGG
A_23_P388993	0.102445	0.0039	3.56626	-1.86441	0.846783	A_23_P388993	NM_033390	CCTCTGTTCTGTGTATTTCTGTAATGGAATCTTTACAATTCCCAAAACGGTATTTTAGAC
A_23_P85716	0.131134	0.00638	3.29874	-2.3371	1.23334	A_23_P85716	NM_021642	ATGGAGACTGGAAAAATCCTGAGCAAACAAAACCACCTGGCCCTTAGAAATAGCTTTAAC
A_33_P3215883	0.174401	0.0115	2.98121	-2.89804	1.23339	A_33_P3215883	NM_002019	CCAGAGTTAGGTTGTCTCCAGGCCATGATGGCCTTACACTGAAAATGTCACATTCTATTT
A_32_P161762	0.31462	0.0464	2.22104	-4.19913	1.2341	A_32_P161762	NM_004348	GCCCAGAATCCAGGTTAATACATGGAAACACGAAGCATTAGCAAAAGTAATAATTATACC
A_33_P3281567	0.184651	0.0128	2.92246	-3.00135	1.2362	A_33_P3281567	NR_002174	ACACGTGGTGAAGAATGGTCTACTCTGGGATGAGTTGTATATAGGATTCCAAACACGGCT
A_33_P3339625	0.271573	0.0322	2.42299	-3.86375	1.23802	A_33_P3339625	NM_013278	CCAACCTCCTTGGAAGTACCCCTGTTTCTTAAACAATTATTTAAGTGTACGTGTATTATT
A_23_P344421	0.177308	0.0118	2.96537	-2.92592	1.23859	A_23_P344421	NM_019055	AACCTCACCATGGAAAGAAAATAATTATGAATGCCACTGAGGCACTGAGGCCCTACCTCA
A_33_P3248439	0.075808	0.00213	3.89697	-1.28471	1.23902	A_33_P3248439	NM_033446	CTTGTACTTGGCAAGGGAAGTCCACTGTGTGATTGTCTGTATTCTTAATATAATTTGTTA
A_23_P211212	0.260027	0.0284	2.49107	-3.74854	1.23931	A_23_P211212	NM_030582	CGGTGGGGCTGGTTCTGTAATTGTGTGTGATGTGAAGCCAATTCAGACAGGCAAATAAAA
A_33_P3235322	0.102704	0.00393	-3.56141	-1.87296	-0.855952	A_33_P3235322	NM_032872	ACCTCAGCTTCCTGACAGAGGAGGAGCAGGAGGCCATTGCTGGCGTCCTCCAACGAGATG
A_23_P169257	0.212854	0.0184	2.72853	-3.34024	1.24007	A_23_P169257	NM_001244	TTCAGGAAGAAAGCGCCTCTCTACCATACAGTATTTCATCCCTCCAAACACTTGGGCAAA
A_33_P3255509	0.1347	0.00681	3.26373	-2.39905	1.24031	A_33_P3255509	NM_001161357	CCCCACACAGGTCCCGGCCTTTTAATGTTCTTTGAATAAACACTTTATTTTCTAATAAAA
A_33_P3359753	0.102869	0.00395	3.55928	-1.8767	0.730435	A_33_P3359753	NM_145257	CCAGGCCACACAATAATTCGGGGTTGTATTTTCTAAGAACTATGTATTGTTTTTAGCTTA
A_23_P73150	0.218972	0.0194	2.69894	-3.39158	1.24046	A_23_P73150	NM_031421	CAGGAAGCTGGTGTTCAGAGGGATCATGGGATTTTATTAAACTGGATTTTCAAGCGATTT
A_23_P404678	0.103036	0.00396	-3.55757	-1.87973	-0.531649	A_23_P404678	NM_004283	TTCACCACATCTCTGATCCTGAAGTGAATTCTGGAACTATGGACCACATTAGACTGGGCA
A_33_P3697530	0.103075	0.00397	3.55695	-1.88082	0.99646	A_33_P3697530	NM_001142287	AAAGCCAAATAGGTCAATTATGCAAATCTCCTGGTGCCATATTAAATTTCTTGACGATGG
A_33_P3371650	0.22146	0.02	2.6822	-3.42058	1.24065	A_33_P3371650	BC052561	CACTTTCACTTAATCGTTAAATTGCCTTAAAATTGCATGCATAGTATATTGTAATTCACA
A_23_P391857	0.10329	0.00398	-3.55466	-1.88485	-0.819991	A_23_P391857	NM_004452	CCATGATGGAAAATGCCCCTTCCAATCAGCTGCCTTCACAAGCAGGGATCAGAGCAACTC
A_23_P91850	0.025057	0.000255	5.12283	0.76184	1.24157	A_23_P91850	NM_144717	TATGTGTGCAATGCGACGAGAATGCAGAAGTCAGTAACATGTGCATGTTTGTTGTGCTCC
A_23_P82929	0.255141	0.0273	2.51376	-3.70994	1.24178	A_23_P82929	NM_002514	TAGGCTGCAAAATTAAATCTAGACATTCTTTTAATGCCACCACACGTGTTCCGCTTCTCT
A_33_P3373298	0.103694	0.00401	-3.55134	-1.8907	-0.566027	A_33_P3373298	NR_040585	GGTGTGTAGTGACTATGTGTCATTAAAAATTTACTTGACCATGGGCAACAGATGTCCATG
A_23_P167096	0.211274	0.0181	2.73689	-3.32572	1.24179	A_23_P167096	NM_005429	TTTCTGCCAATGACCAAACAGCCAAGATTTTCCTCTTGTGATTTCTTTAAAAGAATGACT
A_24_P328504	0.082172	0.00257	3.79521	-1.46228	1.24195	A_24_P328504	NM_007237	ACGGAAAGTGATCAAGCGTGTGGCACAATGGATACTGTGGATATTGCAAACAACTCCACT
A_33_P3243554	0.178344	0.012	2.95964	-2.93601	1.2421	A_33_P3243554	NM_145802	CCAGATCTATCAGTTTCCTACAGATGATGAGTCGGTGGCAGAGATCAATGGAACCATGAA
A_23_P316741	0.088289	0.00294	3.71981	-1.59434	1.24266	A_23_P316741	NM_001025237	TCCAGCACTTTTTATATTTACGTATTCTCCAAAGCAGTGTTCACACGGGAGCCAGCCTGT
A_23_P21086	0.104329	0.00404	-3.54622	-1.89973	-0.564219	A_23_P21086	NM_139278	CTGTAGCTGTCGCTTTCTCAGGCTTGGACTGTCCCCTGGTTCACCCTGTCTTTGGGATGT
A_23_P94911	0.104473	0.00405	-3.54506	-1.90179	-0.536089	A_23_P94911	NM_181845	CGAATGTGGGGAAGCCTTTCTGTGGACAACTTACTCAAATGAGAAAATTGATACTGATGA
A_33_P3387455	0.263657	0.0297	2.46677	-3.78977	1.24282	A_33_P3387455	NM_001029880	TTCAGAGCAACTTCCAGCCAGGAATGAAATTGGAAGTGGCTAATAAGAACAACCCGGACA
A_33_P3318841	0.104482	0.00406	-3.54369	-1.9042	-0.723358	A_33_P3318841	NM_001164479	GAGACAGAAAGATGCTTTCTGAAGGTATCCCATATTTAGAGTATTGGTTACATATACCTA
A_24_P261169	0.258911	0.0281	2.49738	-3.73781	1.24577	A_24_P261169	NM_006378	AACTTCCTTTTGCTAAATGCATTCTTTCTGCTTTTAGAAATGTAGACATAAACACTCCCC
A_23_P37068	0.104482	0.00407	3.54333	-1.90483	0.641001	A_23_P37068	NM_145725	AGAGAAGGTTTTCATTTTCATTTTTAAAGATCTAGTTAATTAAGGTGGAAAACATATATG
A_23_P65427	0.104482	0.00407	3.54215	-1.90692	0.51937	A_23_P65427	NM_002818	AAAGCCATCTATGTACTGAACCCGGGACTAGAAGGAAAATAAATGATCTATATGTTGTGT
A_33_P3280320	0.104482	0.00408	-3.54191	-1.90734	-0.99245	A_33_P3280320	NM_001195127	TGTTTGACAGCTCGCAGTATCCCTACAACTGCTTCAATTACGACGCCGACGACTACCCCG
A_23_P49816	0.17516	0.0116	2.97693	-2.90558	1.24651	A_23_P49816	NM_018404	AATGGAGGCATTGCAATGAAAAGGCACCCACAGCATCATGCAAGTGGCATCTTGTAAAAA
A_23_P385500	0.232434	0.0222	2.62654	-3.5167	1.24684	A_23_P385500	NM_178841	CAATATCTGTGTTTGACTAGGAATAATAGTATTTTTATGGAACATTTACAAAATTATATT
A_33_P3294509	0.112126	0.00464	3.47185	-2.031	1.24688	A_33_P3294509	NM_000610	GCACACCCTTCCTCTGGTTTTTGTATATTTATTGATGGATCAATAATAATGAGGAAAGCA
A_23_P381017	0.321427	0.0495	2.18531	-4.25733	1.24697	A_23_P381017	NM_152559	TCTGCCAAGGATGGCTTCATCTCCGGCATTGTCTACCTGTACCGAAAGTGGAAGGCGACC
A_24_P367439	0.073711	0.00203	3.92353	-1.2385	1.24761	A_24_P367439	AF068294	TTCAACATACTACCAAGTAGCACTGGCATAGAGAGATCCCTGGAATAAAATTTACCTACT
A_23_P104509	0.10479	0.0041	-3.5385	-1.91336	-0.449617	A_23_P104509	NM_014661	CTCACATGAGCAGTTTTCCTTTGTGGAATACTGTCCTCCCTCAGCCAACAGCACACCTGC
A_23_P85800	0.102683	0.00393	3.56223	-1.87151	1.24895	A_23_P85800	NM_001803	TGCCAGACATCACCAGGTTGTAGAAGTTGACAGGCAGTGCCATGGGGGCAACAGCCAAAA
A_24_P706953	0.220121	0.0196	2.69289	-3.40206	1.24939	A_24_P706953	NM_001085429	TCAGTACAACGGGATGGATTTCTTGTTCCTAAGTGTTAAATGATCACATACATAAAAGAG
A_33_P3409740	0.105194	0.00413	-3.53518	-1.91921	-0.670723	A_33_P3409740	AK091259	AATTCCGCCTGCAGGATGACATGAATGCACCTTCCCATTGCCTACCAACAGATCTTTTTT
A_33_P3241771	0.105236	0.00413	-3.53456	-1.92031	-0.646185	A_33_P3241771	XR_109230	TTTGGGGAATCTCTAACCTTCCAGAACTCCCTCTGCCCATATGGAGCCCCGATCTGGGCA
A_24_P336276	0.105284	0.00414	3.53369	-1.92184	0.97597	A_24_P336276	NM_013272	GAACTCAAGTCTTACGCTTTGGGAGTTCTTTTTCTCCTCCTTCGTTTGTTGGGCTTCATC
A_23_P103104	0.061425	0.0014	4.13142	-0.87912	1.24955	A_23_P103104	NM_002405	CCAATTGTGATGATCCTTTTTGCTCATTTCCCAGCCTTTCTTGCTGTTAGGGGCTACCAT
A_32_P220750	0.215488	0.0188	2.71646	-3.36119	1.25014	A_32_P220750	NM_001032392	GTAACGTGTTCACCTCTCGGAAAGGAGCAAAACTTTGCTCAGATCCCAGAATTAACCTGA
A_33_P3268618	0.105284	0.00415	3.53204	-1.92476	0.77402	A_33_P3268618	NM_025132	CAAAGTCTTTCTTACACACTCTATCCTCTGCACTGTTAATAGTAACCTATGACATAATTG
A_33_P3213006	0.105284	0.00415	-3.53203	-1.92476	-0.575398	A_33_P3213006	NM_030966	TGTGGACAGTCCTGCTGCCGCCCAGCCTGCTGCTGCCACTGCTGTGAGCCCACCTGCTAA
A_24_P759584	0.253781	0.0269	2.52156	-3.69665	1.25112	A_24_P759584	NR_002770	CTGTCCATCATCTTTGTCACTGTAATGCTGGGTAACAAATAAACACGAAACAATGAGTGC
A_23_P164797	0.105288	0.00416	3.53145	-1.92579	0.438305	A_23_P164797	NM_016202	TGAACCGGTGGTTGTCTGCGGGGAAGAGATGATAAAGAGCACGGGCACGGTCTGGTTCAT
A_33_P3474319	0.190711	0.0137	2.88795	-3.06192	1.25232	A_33_P3474319	NM_198277	TAGCTCTTGGCATCTCCATCTGAGCCTAAAGTTGCCCACTGGCACCAATAGATTCTGTTT
A_33_P3241521	0.120635	0.00532	3.39693	-2.16341	1.25266	A_33_P3241521	NM_024007	ACATGGTCTCAGCCGTGAAACAGAAGAGTGCTTTCGCACCAGTCGTCAGACCCCAGACCT
A_24_P348203	0.105303	0.00417	-3.53016	-1.92807	-0.582593	A_24_P348203	NM_025061	ATGGAGGGATTAACTCAGTCATGGCATTCTCCGACCAAAACCACACCTGTGTCTCTGGCA
A_24_P495367	0.105303	0.00417	-3.52976	-1.92878	-0.759672	A_24_P495367	NM_001080476	TTTCGAAACTGCTTCACAGACTCTTTCAAAGCCCTGAAGTGTACGGCTTGCAATGAAAAT
A_23_P31064	0.270098	0.0314	2.43629	-3.84131	1.25336	A_23_P31064	NM_015529	TGTAAGTTCTGAATGGTTCCTTGCTGACTTTGGGTGACACATGTACCACATACTGGCTCA
A_23_P300905	0.105686	0.00419	-3.52669	-1.9342	-0.641708	A_23_P300905	NM_145012	TTCTGTACACCCTTATTTTATACCGTTTTTCTTCAACAATGGCGAAATTGACTGTAGTGC
A_33_P3226212	0.198704	0.0152	2.8295	-3.16426	1.25352	A_33_P3226212	NM_021219	TTAGTGATTTCCGTTTGTGGCCTTGGTGTATGCTATGCTCAGAGGAAAGGCTACTTTTCA
A_23_P354208	0.105686	0.0042	3.52617	-1.93511	0.565316	A_23_P354208	NM_152348	GTTGAGAAGAATCATCTCTGCACCTCGGGTCTCTGCCAGAGGAAGACTTAAGCATCCCTG
A_33_P3295415	0.105836	0.00421	-3.525	-1.93717	-0.743967	A_33_P3295415	NM_024784	ACCCCTGCTGGGTGACAAGAATAAAGGCTCTGCCCAGGCTGAAAGTTCCTACCCTTTTTT
A_33_P3269678	0.10584	0.00421	3.52458	-1.93791	0.994485	A_33_P3269678	NR_015395	AAATCTTCAATACATCCTGTCCCCCTAAAACGGCATCTGGGTCTTTTGAGGGTTAAAAAA
A_23_P151459	0.106132	0.00422	3.52268	-1.94127	0.510173	A_23_P151459	NM_015057	TTGTGAGGTGTTTGCATGTGGCCATTACCGTCATTGGCCTGTGAAGCATTGGACATTTAT
A_23_P93389	0.106163	0.00423	-3.52212	-1.94226	-0.494564	A_23_P93389	NM_006703	ACTTCCAATAATTTGTCCTATAATGTGCTGTACAGTTCAGTAGAGTGGTCACTTTCACTG
A_33_P3245908	0.037913	0.000509	4.71145	0.0973	1.25573	A_33_P3245908	NM_001010863	CACAGGTGATTGAGCTGTAGGTGAGCAGTGACGTGAAGAGGGGTTCTAGCCCCGTGGAAA
A_33_P3273298	0.106967	0.00427	-3.51699	-1.9513	-0.975803	A_33_P3273298	NM_001004301	CTTCTAAAGACTCTTGGTATGTGAGGAAGAAACCTGGAAGAGGAAGAGGAAAGCAAAGGA
A_33_P3318288	0.081604	0.00253	3.80302	-1.44863	1.25647	A_33_P3318288	NM_001014975	AAGTTTGTACAGGGTAAATCTATAGACGTTGCCTGCCATCCTGGCTACGCTCTTCCAAAA
A_23_P18282	0.190333	0.0136	2.89191	-3.05497	1.2574	A_23_P18282	NM_007335	CACATTGAGATCACTACTCAGTGCATAGCGAAGACCAGTATGGCAAAATTAGTCTTGGAA
A_33_P3370763	0.106967	0.00428	-3.51503	-1.95477	-0.939435	A_33_P3370763	NM_015077	TTAAGCTGCGGCAAGAACATTGTGCCCATCATTGATGGCTTCGAGTGGCCTGAGCCCCAG
A_33_P3290617	0.106967	0.00428	-3.51485	-1.95508	-0.894581	A_33_P3290617		AATTTTGGCTGTTTCCTGCAACCTATCATCAGATGCCACACTTATGAGACCCTCATCCTT
A_23_P216596	0.179029	0.012	2.95592	-2.94254	1.25941	A_23_P216596	NM_153366	TCTCGCTGTCATACAGCTGTTTGCCAGTCTCCCTGCTTAAATGGTGGAAAATGTGTAAGA
A_23_P62647	0.157655	0.00928	3.09664	-2.69449	1.26071	A_23_P62647	NM_003037	TCTGTGCCTCAGTTTCTCTCTCAGGATAAAGAGTGAATAGAGGCCGAAGGGTGAATTTCT
A_23_P202737	0.106967	0.00429	-3.51366	-1.95719	-0.651189	A_23_P202737	NM_003772	TTTTATAGTACAGGTTTTGTAATGTTACATGTGATGATATGAGCTCCCACCTTATATGGG
A_33_P3298430	0.106967	0.00429	-3.51363	-1.95723	-0.752637	A_33_P3298430	NM_001010924	AAGAAAAGCCCCTGGCAGAAACGGGAGGAGAGGCCCCTGATGGCGTTTAACATTAAATGA
A_23_P421401	0.300777	0.0411	2.28821	-4.08873	1.26137	A_23_P421401	NM_002609	ACTCACGTTAACTCACATTTATACAGCAGAAATGCTATTTTGTATGCTGTTAAGTTTTTC
A_23_P139418	0.067233	0.00169	4.02666	-1.0597	1.26157	A_23_P139418	NM_198516	CCTCTTTGCTACTGTGTAGCACCTGCTGCAACGTTGCCTGCTGTCCACGTGGGGTTGTTT
A_23_P122052	0.24275	0.0245	2.57245	-3.60965	1.26462	A_23_P122052	NM_001008397	TTAAGTGGTAATGAATGTTCCCAGGATGAGGATGTTACCCAAAGCAAAAATCAAGAGTAG
A_24_P38081	0.140494	0.00739	3.21924	-2.47777	1.26509	A_24_P38081	NM_004117	CCCCATGGAACAAATGGGATCAATTTGTGAGTTTTTTCCTTTAATGATAACTAAAATCCC
A_32_P2452	0.118911	0.00516	3.41421	-2.13287	1.26639	A_32_P2452	NM_175861	GTACATTTTTGTTACTTTGGCTGTGCCCGTTAGAATTTATCTTCCATAAAGTATTTCTCC
A_32_P119248	0.079693	0.00238	3.83642	-1.39027	1.26706	A_32_P119248	NM_207305	GTACTATGAACGTGAGTGGGGTATTTTGTTCTGGCATTAAAAGAAAAACAAGCAAGCAAA
A_24_P706340	0.177823	0.0119	2.96267	-2.93067	1.26813	A_24_P706340	NM_001080396	CTGTCTTTATGTCCTGTCAGCTTCTATTAGAGGAATGATTGCTATGACCTCATGGTATAG
A_33_P3322363	0.305946	0.0427	2.26722	-4.12336	1.26814	A_33_P3322363	NM_001123366	CCACAACACGTGTAAACTCCTGGGTTGCTGATAAAACTAAAGGTGAAAATATATTGTTAT
A_23_P107465	0.108411	0.00438	-3.50289	-1.9762	-0.876448	A_23_P107465	NM_002277	CTGTTCCTTCCTATGCTCACCCAGAGAACTCTCTGATGTGCCAGTGGCCCTCCCTTTTAA
A_24_P122746	0.314478	0.0463	2.22267	-4.19647	1.26853	A_24_P122746	NM_022834	GCCATGCTGCAGTTGCTTCTAGTTGAGACGAGAAGAGCGACAAGGTTGTGATCCACGTGG
A_23_P71148	0.097681	0.00351	3.62371	-1.76322	1.26949	A_23_P71148	NM_000712	AGGTGATGTAGCACTTCCAAGATGGCACCAGCATTTGGTTCTTCTCAAGAGTTGACCATT
A_32_P40463	0.034546	0.000435	4.80323	0.24771	1.26955	A_32_P40463	NR_002779	GGGAAAAGTTCAATCTCTATTTTGGTCCACAAGGATCAAGTGCTTATGAACCAGACCAAA
A_23_P36882	0.287841	0.0368	2.34987	-3.98634	1.27068	A_23_P36882	NM_006183	AAATGTTTGCAGTCTTGTAAATAATTTGAACAGCCCAGCTGAGGAAACAGGAGAAGTTCA
A_23_P143845	0.109391	0.00443	-3.4963	-1.98783	-0.91883	A_23_P143845	NM_015508	CTAGTTAATCCTGTTGTTTGCTGCCATTGGCATGAAATGGCCAACTGTGGCTGTTACAGT
A_32_P59302	0.041721	0.000627	4.58998	-0.10357	1.27118	A_32_P59302	NM_024503	GTGAATCCAGTCTGCTTTCCATTAGAAAACCGCTTCGGCACTTATGGTCACTTTAATAAA
A_23_P133691	0.082467	0.00261	3.78554	-1.47919	1.27132	A_23_P133691	NM_021244	CTGCTGTGATATGATAGATGTGGTTATTGACATCTCTTGTATTTATGGTCTCAAAGAAGA
A_23_P75811	0.109801	0.00446	-3.49309	-1.9935	-0.709338	A_23_P75811	NM_001012662	ATCCTGAGCCTACTCGAATCCAACAAAGACTTGCTGTTGACTAGCTCATACCTGTCTGAT
A_33_P3304824	0.041721	0.000628	4.58882	-0.1055	1.27156	A_33_P3304824		TGTCAAGGGAGACCTCAACGACCTTCCTCTGAAAAGAAAAATGTCCTTGCAAGTAGGTAA
A_23_P251505	0.109977	0.00447	3.49143	-1.99643	0.578746	A_23_P251505	NM_148956	CTCCCCTGAGACCACACTCAGCAGTGGCTTCTTCGTTGCTGTAATTGAACGGGTCGAGGT
A_23_P34744	0.129959	0.00627	3.30817	-2.32042	1.27166	A_23_P34744	NM_000396	ACCCTAGAGGACTAGGGTAATCTGACTTCTCACTTCCTAAGTTCCCTTCTATATCCTCAA
A_24_P588897	0.102853	0.00394	3.5602	-1.87509	1.27188	A_24_P588897	NM_013272	GATTTCCTGGTAAGATCATTGGATTTACAGAATACAAAAATGTACGGGATGGAATAAACC
A_32_P91042	0.11023	0.00449	-3.48901	-2.0007	-0.793305	A_32_P91042	NR_027406	GTGGGGCCAATGAAGCCAATTCTTCTTTTGTACATATGCAGTCCTGTAAGAATGCATTCA
A_33_P3405848	0.110253	0.0045	-3.48757	-2.00325	-0.889077	A_33_P3405848	NM_175719	GGATTACATCCCCAGGATCCTGGGACCCGAGGCCTTCCAGCAGTACGTGGGTCCCTATGA
A_33_P3337981	0.110253	0.00451	-3.48748	-2.0034	-0.570133	A_33_P3337981	NM_014845	CTCCCAACAGATTTTTATTTGCATCACAAAAATACCATGAGACTTTTGCCAACAAGAAGA
A_24_P37264	0.317273	0.0474	2.20896	-4.21885	1.27248	A_24_P37264	NM_014746	TCTTAAAGGGGAACAAATGATCTTGACAACATATTATTCCATAAAACCAGTTTAGGGCAC
A_23_P107693	0.110253	0.00451	-3.48734	-2.00366	-0.554146	A_23_P107693	NM_017652	GAATGCTAGCTTCTTTACATAAAAGAGTGCTCCCACTGAAGAAGTGCCTTTTGAGTGCAA
A_23_P163216	0.131881	0.00649	3.28954	-2.35339	1.27392	A_23_P163216	NM_024837	ATCAGTGTATTTTCCATAAAGTGATTCGGGCATATTTGTGTGAAAACCTCAGTTCTGTCA
A_33_P3296193	0.070101	0.00184	3.98057	-1.13949	1.27413	A_33_P3296193	NR_003677	GCCTCTGTGGTTATGCTAAATAAGTTTAACAGATACTTTATAGAAAACAAATCAGGGTGC
A_24_P135753	0.110424	0.00453	-3.48496	-2.00786	-0.550554	A_24_P135753	AL832532	ATAATAAAAGGTTGGCATTGATATGGTACAACCTGCAAATTACTTGCAGTTCTGAGTTTC
A_23_P251767	0.110424	0.00453	-3.48494	-2.00789	-0.872515	A_23_P251767	NM_017869	AGATCCACCAGATCGGAGAAGACGGACAGGTGCAAGTAATCCCACAGGGACACCTCCACA
A_23_P217704	0.048286	0.000881	4.394	-0.43185	1.27445	A_23_P217704	NM_003918	CTCCTCAAAGCCATTTCCACTCAGCTCTTTCCAGAGAATTCTCAGTTTTATGAGACGGGA
A_24_P923102	0.290503	0.0377	2.33679	-4.00815	1.27556	A_24_P923102	NM_001199290	TAAAATGAGCACAATACGAAATAGTATGCATACTATGATTGTGACTTTGTAAAATCTTTA
A_23_P43337	0.161668	0.00971	3.07239	-2.7373	1.27581	A_23_P43337	NM_144966	ACAAGGGAAATGGCAAACAAAAGACTGTAGGAGAGCCAAACCTCATAATTATGTGTGTTC
A_33_P3283616	0.187058	0.0131	2.90959	-3.02394	1.276	A_33_P3283616	NM_002351	TTAAATATATGCTAAGTCTTATATATTGTAGATAATACAGTTCGGTGAGCTACAAATGCA
A_33_P3390625	0.111359	0.00458	3.47842	-2.01941	0.678664	A_33_P3390625	NR_002793	GAGTGGATGGCTCAAGATTCTGAAAACATCGTAGTGATTCACTGTAAAGGAGGCAAAGGT
A_33_P3377691	0.111815	0.00461	-3.47545	-2.02465	-0.810576	A_33_P3377691	NM_001008393	GGGACAGATGGATGGGCAAAGAATAGTTTTGTTTAACATATTAGGTCATAGTTCTTGATT
A_33_P3373991	0.111815	0.00461	-3.47519	-2.02511	-0.865419	A_33_P3373991	CN283607	CGTAGCCGCTGCGCGGAGCCTCCCGGCTTTGTTTGCGTCCATCCGCCGGCTGCGACTCCC
A_32_P192823	0.306351	0.0429	2.26443	-4.12795	1.28086	A_32_P192823	NM_175886	GCTCCAAAATACGAGTAATTGACATCTCCATGATCCTTGCAGAAGCCATAAGGAGAACTC
A_33_P3235217	0.161247	0.00967	3.0744	-2.73376	1.28089	A_33_P3235217	NM_001905	CCCTGACTCTGAAATCACCGAACTGAAGTTTCCATCAATAAATCATGACTGATCTTGTAG
A_23_P416305	0.151645	0.00863	3.13582	-2.62526	1.28146	A_23_P416305	NM_000990	TGCTGAAAAGTAATATTTTCTCTTTCGAGAGTTTTCATGGCCTTTTAAATTACACCCCCA
A_23_P54770	0.014294	7.55e-05	5.88298	1.92107	1.28188	A_23_P54770	NM_018690	GCAGGCAAAACCAGACGTCTGGGAATACCGTGAACTTAAGGAGTCTGATTCTCCGACACA
A_23_P167692	0.112126	0.00464	-3.47108	-2.03237	-0.649804	A_23_P167692	NM_002752	CAGCTGGGAACACCATCAGCAGAGTTCATGAAGAAACTTCAGCCAACTGTGAGGAATTAT
A_33_P3394252	0.112126	0.00464	-3.471	-2.0325	-0.799855	A_33_P3394252	NM_152519	CCTTTCCAGGGTACCACCCTATTAAGCATTAATTTCTTCATTTTTTAAATGGGGACAAAA
A_33_P3342628	0.116404	0.00494	3.43722	-2.09219	1.28226	A_33_P3342628	NM_021170	CCCGTTCTAGGGCCGTGGCCTTTGCCGAGACTGTAGCAGAGAAAACGTATTTATTATTCC
A_24_P64167	0.262488	0.0294	2.47327	-3.77875	1.28384	A_24_P64167	NM_000962	ACAGGCTAAATGCACCAAGAAAGCTTCTTCAGAGTGAAGAATCTTAATGCTTGTAATTTA
A_33_P3316508	0.288957	0.0371	2.34508	-3.99434	1.2846	A_33_P3316508	NM_001015051	AAGCTTGATGACTCTAAACCTAGTTTGTTCTCTGACCGCCTCAGTGATTTAGGGCGCATT
A_33_P3375002	0.112126	0.00465	-3.46988	-2.03449	-0.947767	A_33_P3375002	NR_038263	ATGTTCTAGATGCACAGATTTGGGGGCTTGATTGACAACCTGACACCTCACTCTAAATCC
A_32_P123629	0.058478	0.00126	4.19236	-0.77461	1.28594	A_32_P123629	NM_001135993	TGCCGTGACTTATCCAACCTGTGAACTGATTGTGATCTGCTTGGTAACTTGGTTTGGTGT
A_32_P11230	0.112208	0.00467	3.46845	-2.03702	0.548041	A_32_P11230	NR_024497	TGGTGTTAAACAGATTTAATGACGGTCATGGCAACTTTTTGGCACAATGAAAAATATCGC
A_23_P170453	0.112208	0.00467	-3.46822	-2.03741	-0.826807	A_23_P170453	NM_001900	AACTTGGACAACTGTCCCTTCAATGACCAGCCAAAACTGAAAGAGGAAGAGTTCTGCTCT
A_33_P3328637	0.112208	0.00467	3.46813	-2.03757	0.973326	A_33_P3328637	NM_001173486	ATCAAAAAGCTGGGTGACTACCTGAGCAACCTGTGCAAGACGTGAGCCCCAGAAGCAGGC
A_32_P38637	0.112209	0.00467	3.46775	-2.03826	0.55977	A_32_P38637	NM_032534	ATTTGAGAGAACTCAGCCCCCTGGTCTAAGCTGGACTTACCTCTGTGGATTCTGAAATTA
A_23_P148584	0.053274	0.00105	4.29295	-0.60303	1.28681	A_23_P148584	NM_144658	TTGCACCACTGTGTTTGGTTTGTACTTTTTTAGGTAAATCTATATGCTGAAAAGTAGAGC
A_23_P16976	0.11241	0.00469	3.46601	-2.04132	0.475536	A_23_P16976	NM_001153	AATTAAAACGCCTACAGCTGCCTCCTAGAATATAGACTGTCTGTATTATTATTCACCTAT
A_33_P3235642	0.112504	0.00469	-3.46517	-2.0428	-0.620322	A_33_P3235642	NM_001193272	CAGCCACCTAAGAAGAAACCCAAAACAACCAATATAGAACTTCAAGGAGTACCAAATGAT
A_23_P415652	0.112662	0.0047	-3.46401	-2.04485	-0.883527	A_23_P415652	NM_024642	GAGAATCAGAAGTTCATCTTGCAGGAGGATGGATCTTTATTTCACGAACAGTCCAAGAAA
A_23_P212756	0.108411	0.00438	3.50277	-1.97641	1.28727	A_23_P212756	NM_001004057	GGTTCGAGGAAGAGTTGGAACAGTCGGCTACATGGCACCTGAAGTTGTCAATAATGAAAA
A_33_P3313245	0.112702	0.00471	-3.46307	-2.04651	-0.645671	A_33_P3313245	NM_001167595	TTTCTATACGACTTACAGGACAGCAGATGGGGAATTCATGGCTGTTGGAGCAATAGAACC
A_23_P136405	0.066568	0.00166	4.03809	-1.03995	1.28843	A_23_P136405	NM_005018	GCTGGGACAAGGGATCCCCCTTCCCTGTGGTTCTATTATATTATAATTATAATTAAATAT
A_24_P308851	0.113052	0.00473	-3.46063	-2.05083	-0.796818	A_24_P308851	NM_032087	CAACATGTCACTGAGCCTGTTCGTGCTGGACCAGAATGACAACCCGCCCGAGATCCTGTA
A_33_P3375541	0.038353	0.000535	4.68199	0.04878	1.28854	A_33_P3375541	NM_000732	GCTTCTAGAAGCAGCCATTACCAACTGTACCTTCCCTTCTTGCTCAGCCAATAAATATAT
A_23_P99275	0.183188	0.0126	2.93171	-2.98511	1.28858	A_23_P99275	NM_002258	TCAACCCTTGGAATAACAGTCTAGCTGATTGTTCCACCAAAGAATCCAGCCTGCTGCTTA
A_23_P4161	0.317273	0.0475	2.20884	-4.21904	1.29002	A_23_P4161	AB023218	AAAGGCTCATCTTACTTGTAAACATGGACTGCTCAATCACTATTAAAAAGTCAGTTTAGG
A_24_P324674	0.164349	0.0102	3.04546	-2.78483	1.29139	A_24_P324674	NM_002348	CACCACCACAACAGAATGATCTTGAGATTCCTGAAAGTCCTACCTATGAAAATTTCACCT
A_32_P166693	0.212981	0.0184	2.72736	-3.34227	1.29177	A_32_P166693	NM_020733	ATCATGAGTTGCTCTGAGTTTTGTTAATGTTTGTGTTGGTGGATTGACGGTTAAATGAAG
A_33_P3327617	0.125417	0.00576	3.354	-2.23935	1.29214	A_33_P3327617	NM_201563	TGCACAGGAAACATAGGCTACACGCTGTACTCATCCAAGCCTGTGACCATCACTGTCCAA
A_23_P100730	0.114035	0.0048	3.45327	-2.06382	0.694258	A_23_P100730	NM_003726	AGAAGGAAACCTTGGGAGGAGGACATTACTGGTTGTTCTGGCTGGTTTGAAAAGCACAAA
A_23_P88873	0.114487	0.00482	-3.4505	-2.06873	-0.605564	A_23_P88873	NM_022041	TTTTTTCCAGTCTACACCAGGCCTCTCCAAGGAGACAGTTCATTATTTAGGAGTGAATGT
A_33_P3254136	0.28049	0.0346	2.38281	-3.93127	1.29347	A_33_P3254136	NM_177531	CACCTCAGATCATTGTTAGTCTTACTTAGCAGAAAATGTATAAACACTTACCAGGTAGTA
A_33_P3339860	0.062969	0.00148	4.09961	-0.93383	1.29356	A_33_P3339860	NM_021623	GCATGGAAACTGTTACGCTTCTCATTTTATGTGATCTCCTAATTGGTATGTAGCAAAAAT
A_32_P538017	0.115125	0.00486	-3.4466	-2.07562	-0.669492	A_32_P538017	NM_005995	CCAGCAGCCTGAATACTGTGCCCTCTTGCTTTGGGGGTAACTCCCGAAAACCCTGCCTTA
A_24_P92183	0.115352	0.00487	3.44515	-2.07817	0.732016	A_24_P92183	NM_001124756	TGGAGATTGACAACTCAGAGCTGTTGCTCATGCTGGAGTCTCCAGAATCCCTCCATGCCA
A_33_P3248765	0.115375	0.00488	-3.44467	-2.07903	-0.472006	A_33_P3248765	NM_015999	TGCTTCAAGAGCATCTTCCGCATTCATACAGAAACTGGCAACATCTGGACCCATCTGCTT
A_23_P147025	0.042746	0.000651	4.56793	-0.14026	1.29387	A_23_P147025	NM_004794	TTCTTTCCCTTTTTTCTGTGCCTGCATAATGCTGACACCTGCTTGTTTCCATACAAATTG
A_33_P3379091	0.084894	0.00274	3.75951	-1.52477	1.2939	A_33_P3379091	NM_145731	CCCAGGGCTTAGCACAAGCATGCTCAATAAATGTAAGCTCTTTTGTTCATTCATTCATTC
A_23_P115161	0.287841	0.0368	2.3493	-3.98729	1.29433	A_23_P115161	NM_002036	TCCCCCTCAACTGAGAACTCAAGTCAGCTGGACTTCGAAGATGTATGGAATTCTTCCTAT
A_23_P152235	0.320635	0.0491	2.1897	-4.25019	1.29533	A_23_P152235	NM_024336	ATGTGTGAACCAAATTGTACGAGAAAGTATCTATTTTTGGCTAAATAAATGAGCTGCTGC
A_23_P404162	0.074089	0.00206	3.91781	-1.24845	1.296	A_23_P404162	NM_014707	TTCCATCTCATAAATATTCATTTTCTTCAAAGTCTTTTTTCAATCTCATAAAAAAGGGAT
A_33_P3216053	0.010558	3.83e-05	6.33007	2.55989	1.29636	A_33_P3216053		TTGTCTAATGGAAGGCAAGCTTGAGACATCTAGGATTAAAAAACAAACAAACGAACAAAC
A_23_P253317	0.042979	0.000665	4.55596	-0.16019	1.29777	A_23_P253317	NM_013308	GAACCTGTGCTTTGATCCTATCCTGTACTATCACCTCTCAAAAGCATTCCGCTCAAAGGT
A_33_P3386591	0.247955	0.0256	2.54779	-3.65186	1.29799	A_33_P3386591	AK093310	ATCCTAAAACACATCATCCATCCAGCTCAAGCACAAGAAACAGATGTGGAGCCTAACTGA
A_23_P66432	0.125927	0.00585	3.34598	-2.25353	1.29946	A_23_P66432	NM_032646	TCATTCCTTACCCTGGTTAGGTCACTACTTTTGCAGATTTTGCTGGCACTGATCTGGAGA
A_33_P3340752	0.272696	0.0326	2.41679	-3.87418	1.30004	A_33_P3340752	XR_132784	TTGCAACCTTACCAGAAAGCACTTAGGAAAGTGATGATTCTGATGGAGAAATAAGAAAAA
A_24_P215240	0.293739	0.0391	2.3165	-4.04188	1.30187	A_24_P215240	NM_145010	AAGCATGATCTTGAGCCTTCAGGACTAGTTCCAAAGTACATCAATAAAAAGGATTATGGT
A_24_P333571	0.116561	0.00497	-3.43445	-2.09709	-0.967596	A_24_P333571	BC022483	GCTGTCCATTAAAATCAACTGCCTTTGAATCACTGACCAGAACAGATTAACTTCAGAAGT
A_24_P286951	0.224796	0.0207	2.66485	-3.45059	1.30221	A_24_P286951	NM_024889	CCTCATAGTTGAACTTGGATTTGAAAATACCTTCAGCACTTAGAAGAGACATTCAAATAC
A_33_P3405068	0.116583	0.00497	-3.43377	-2.09828	-0.888532	A_33_P3405068	NM_020443	CTGGGGAGGGGTTCAGAAAACATCAAAACACTGCAGCAGTTCCTAAATGATTCTCACAAG
A_33_P3343155	0.116716	0.00498	-3.43278	-2.10004	-0.755511	A_33_P3343155	NM_002072	CCACGATTTTAAAATGACTTTTATTATGGGTATGTGTTGCCAAAGCTGGCTTTTTGTCAA
A_23_P254688	0.238936	0.0235	2.59596	-3.56931	1.30265	A_23_P254688	NM_023943	CGACTATAGAGACACTGGGATGGTCCTTGTTAACCCCTTCTGTCAAGAAACACTGTTTGT
A_23_P79145	0.116744	0.00499	-3.43191	-2.10158	-0.423372	A_23_P79145	NM_144694	CTTATAAGTGTCAGGAATGTAGGAAAGCATTCAGCCAGATTGCCTACCTTGCTCAGCATC
A_24_P756289	0.116822	0.005	-3.43118	-2.10288	-0.939907	A_24_P756289	NR_004053	ACAACCTATCAACAAAAATCAACTAATAGTTTTATAACGTGCATAGGTTTACCCCATGGG
A_23_P152791	0.190711	0.0137	2.88768	-3.06238	1.3035	A_23_P152791	NM_004694	GAGATATGTAGAAAGACTCTTTGGTTCACATTCCGATATTAAAATAGTGACATGAACTGG
A_23_P128974	0.09833	0.00356	3.61611	-1.7766	1.30518	A_23_P128974	NM_006399	TATTAAGAAAGATGCTCAAGTCCCATGGCACAGAGCAAGGCGGGCAGGGAACGGTTATTT
A_33_P3318459	0.117422	0.00503	-3.42728	-2.10976	-0.6595	A_33_P3318459	NM_003352	ATTCCTGTATGGTGCATATATGATACAGTTACCTAATCATGTTGAATAAATGGGCATGCC
A_33_P3342126	0.290739	0.0378	2.33526	-4.01069	1.30578	A_33_P3342126	NM_020226	GTAATTTTGTGCCAGTGAAATGGAGTCTGAATAGTTATGTGTTTCTTTTATCCCTGGAAA
A_23_P31921	0.291818	0.0383	2.32819	-4.02245	1.30599	A_23_P31921	NM_000050	TCCCTGGAGGATGCCTGAATTCTACAACCGGTTCAAGGGCCGCAATGACCTGATGGAGTA
A_33_P3270009	0.117488	0.00505	-3.42568	-2.11258	-0.748455	A_33_P3270009	NM_147223	TTGCCAAAGCCCAAATTAACGAGTATTATAAAAGGATAATAAAGCATCCCTGAAGCCAAA
A_33_P3311971	0.184831	0.0129	2.92096	-3.00399	1.30659	A_33_P3311971	AB306227	ATTCATTACTCAGTTGGTGCTGGTATCACTGACCAAGGAGAAGTCCCCAATGGCTACAAT
A_23_P143902	0.23391	0.0225	2.61961	-3.52863	1.30682	A_23_P143902	NM_022788	GAGAGCACTCTGTGGTTAACTTCCTTAAATGCATGCCTGGATCCGTTCATCTATTTTTTC
A_33_P3233081	0.117825	0.00507	3.42291	-2.11749	0.799808	A_33_P3233081	NM_002441	AAACTGGATTTGGAAGATCCTAACCTGGACTTGAACGTTTTCATGAGCCAGGAAGTGCTG
A_23_P145718	0.071628	0.00191	3.95824	-1.17821	1.30819	A_23_P145718	NM_001637	TTTACAAACTTCAATCTTTTCTACATGGATTTTGCCTTCCATGAAATCATACAGGAGTGG
A_23_P82868	0.307652	0.0435	2.25666	-4.14075	1.31217	A_23_P82868	NM_000930	TGAACAACTAGGCTTCAGCATATTTATAGCAATCCATGTTAGTTTTTACTTTCTGTTGCC
A_23_P134953	0.118152	0.0051	3.42059	-2.12159	0.751853	A_23_P134953	NM_001122	GCTGCAGAAAATGAAGGAATCTTTAGATGACGTGATGGATTATCTTGTTAACAACACGCC
A_23_P110253	0.140357	0.00736	3.22143	-2.47388	1.31251	A_23_P110253	NM_000222	AAAGTGGTTGTTAGTTATAGATGTCTAGGTACTTCAGGGGCACTTCATTGAGAGTTTTGT
A_33_P3375576	0.118561	0.00512	-3.41798	-2.1262	-0.600978	A_33_P3375576	NM_003980	AGAGCCCAGAAATTCCTTTGAATCCAATTTTGGCCTTTGATGATGAAGGGACACTTGGGC
A_23_P134851	0.243331	0.0247	2.56784	-3.61754	1.31394	A_23_P134851	NM_003974	GTCGCTGCGTCTCTGGAGAGGGCAACTTTGAGTTCGAAACCCGGCAAGGCAATGAGATCT
A_32_P141768	0.197278	0.0148	2.84513	-3.13692	1.31455	A_32_P141768	NM_020133	GCTGTCATGTCACCCTAGGGTACTGTCGCTCTGTCATGTGTAGCAATCTTTCCAAATTTT
A_23_P255672	0.118729	0.00514	-3.41611	-2.12951	-0.812223	A_23_P255672	NM_032432	AACTGGAAACCCCCATTTCTCATTAGTGCAATGTCATATCTGATCCCAGGAAGCCTGGAA
A_24_P11506	0.015956	9.96e-05	5.70529	1.65831	1.31476	A_24_P11506	NM_001032998	GAGTCACAACTACAACTTCACGGACTTAACATTGAAGAAAGTATGCGGATGATAAAGCCA
A_24_P246196	0.307534	0.0434	2.25902	-4.13686	1.3148	A_24_P246196	NM_001144911	CCAGACCAGTCCAAGCAGCAGCAAATCTATCAAGAACTGACCGATTTGAAGACTGCATTT
A_33_P3237734	0.118911	0.00516	-3.41418	-2.13292	-0.971352	A_33_P3237734	NM_001040261	TAAACTAAAACAGCACTTTAATAATGCGCTCCCCAAACAGAACAGCACTACCACCGGGGT
A_33_P3372368	0.119179	0.00517	-3.41259	-2.13573	-0.492779	A_33_P3372368	BC007663	GCTCCCGGATTTTGCTCTCCAGCCTCCGGTTCTCGGTCTCCAGGCTCCTCACTCTGTCCA
A_23_P48676	0.241639	0.0241	2.58018	-3.59639	1.31537	A_23_P48676	NM_002863	TTCTCCAGTGACCGAACAATTAAAGAATATGCCCAAAACATCTGGAACGTGGAACCTTCA
A_23_P250102	0.216835	0.019	2.70919	-3.3738	1.31572	A_23_P250102	NM_012298	GAAGGTTTCAAATGTGTCTAGTGTTCAGTATTGAGGACAAAGAAATACAAGTGGCAGGCC
A_33_P3378491	0.056681	0.00118	4.2262	-0.71676	1.31731	A_33_P3378491	AY124781	TGACAAAGGAGAAGTTCCCAATGGCTACAATGTCTCCAGATCAAACACAGAGGATTTCCC
A_32_P41026	0.119453	0.0052	-3.40964	-2.14095	-0.642938	A_32_P41026	NM_001024956	CAAAGACAAAATAGCATATCAAAAGTTAATCACTCAGTTGGAAAGCACTCATACCATAGG
A_23_P100001	0.119453	0.0052	-3.40952	-2.14116	-0.978921	A_23_P100001	NM_207446	ATCTCATGGAAAAGCTGGATTCCTCTGCCTTACGCAGAAACACCCGGGCTCCATCTGCCA
A_23_P69908	0.119818	0.00522	3.4075	-2.14473	0.78795	A_23_P69908	NM_002064	CTGATAAAACTTACAGCCCCCTACACCAAGAGTGTATCTGTGAAAGAGCTCCTACACTTT
A_23_P102060	0.12011	0.00524	-3.40562	-2.14805	-0.430082	A_23_P102060	NM_006751	GTATCATCCAAATAATGGGGCCTATGACTTGAATGAATAGAAATGAATAAGCTGGTGTTT
A_23_P140876	0.270164	0.0315	2.43438	-3.84453	1.31782	A_23_P140876	NM_001089	CCCAGTGACTTGTCCAAGTTTACACACGACACTAATCTCCCCTGGGGAGGAAGCGGGAAG
A_23_P376557	0.27074	0.0318	2.42983	-3.85221	1.31786	A_23_P376557	NM_022468	ATGGGTAGAGTCACTTAGGGGCCACTTCCTAAGTTGCTGTCCAGCCTCAGTGACCCCCTA
A_23_P160025	0.014063	7.14e-05	5.91869	1.97326	1.31792	A_23_P160025	NM_005531	GACCAGGAAAAACAAGAAAGACATACTCAATCCTGATTCAAGTATGGAAACTTCACCAGA
A_23_P19657	0.12011	0.00525	-3.40436	-2.15028	-0.882194	A_23_P19657	NM_032832	AAACCCCAGACTTTGAATTAGTAACAGCTCTAAGATGGTCATGCAGTGAGATAGGAAATC
A_33_P3282556	0.104105	0.00403	3.54822	-1.89621	1.31859	A_33_P3282556	NM_024600	TACTGTTATGTCGGTCATATGTCTGTACGTGTCGTGGGCCAACCTCGTTCTGCCTCCAGC
A_33_P3361457	0.082129	0.00256	3.79705	-1.45905	1.31881	A_33_P3361457	NM_000874	TAGAGCACAGTGATGAGCAAGCAGTAATAAAGTCTCCCTTAAAATGCACCCTCCTTCCAC
A_23_P144896	0.275766	0.0334	2.40316	-3.89711	1.31926	A_23_P144896	NM_005451	ACACCTGCTTCGTCTGTGCGATATGTCAGATCAACCTGGAAGGAAAGACCTTCTACTCCA
A_23_P166400	0.010548	3.52e-05	6.3869	2.63881	1.31961	A_23_P166400	NM_001007279	AAAGGACTTGGCTATGAACTTGACTGGAAACACGCAGCCTGCTCCTGGAGCTTCACTGGA
A_24_P80204	0.152108	0.00868	3.13281	-2.63059	1.32061	A_24_P80204	NM_005434	TCACCAGGACCTCAACGGGCAAAGTTGTGCACACTAAAATATCAAATCAAGGTGCTTGGT
A_23_P216489	0.123384	0.00556	3.37368	-2.20453	1.32062	A_23_P216489	NM_005476	GGTGTAATCTCTCATGGTGAAATCTGCTCTGTACATCAGACAATTGCATTGCTACCAAGT
A_23_P94591	0.120597	0.0053	-3.39941	-2.15903	-0.468264	A_23_P94591	NM_032928	TATGGGACACGGGGTCGAAGGGGCCTGTACACTCTGTCATTTCCTTTCTAGCCCCTGCAT
A_33_P3229215	0.120597	0.0053	-3.39911	-2.15957	-0.699262	A_33_P3229215	NR_024126	TAAAGATGACTTGCAGACAAATGTAGAGATCATCCCAGGGGAAAGTGCCCCAAGAAAGGA
A_33_P3334043	0.059414	0.00131	4.16753	-0.81714	1.32155	A_33_P3334043		TCTCATATGCAAATCAGGGCTAAACAGCGAGTGGATGATATTTTGTCTAGATCAGCCATG
A_23_P159775	0.242262	0.0243	2.5762	-3.60321	1.32187	A_23_P159775	NM_004961	GGTGGATAGGGTGGGGTCTCCATCTACTTTTTGTCACCATCATCTGAAATGGGGAAATAT
A_33_P3349496	0.210266	0.0178	2.74543	-3.31087	1.32235	A_33_P3349496		TTCTAGCATTGTTAGGGAGATTAAATGTGATCATGCATTCAAGGGCTTAGCACGGGGCCA
A_23_P250347	0.151015	0.00857	3.13952	-2.61874	1.32264	A_23_P250347	NM_001744	AGGTGCAAGCCTTAGAGAAAGTTAAAGGTGCAGATATAAATGCTGAAGAGGCCCCCAAAA
A_23_P16683	0.120616	0.00532	3.39738	-2.16263	0.860674	A_23_P16683	NM_017722	CTCAAGACATTTCCTTGCAAGAGGTTTAAGGAGGGCACCTGTCAACGCGGGGACCAGTGC
A_23_P7582	0.119451	0.00519	3.41026	-2.13985	1.32292	A_23_P7582	NM_003202	CCCAGAAAACCTCCAGTAGTGGACAACAGGTTTTCACCATAGCCTACGTTAACCCATTTT
A_23_P45166	0.12069	0.00533	-3.39618	-2.16474	-0.446127	A_23_P45166	NM_007198	TCCCAACTGTGGAATGGCAGTGTAGGTAGCTTCAGGAAATGGCTCAGGTTAATTCTCAAA
A_23_P132718	0.12069	0.00533	-3.39596	-2.16513	-0.847221	A_23_P132718	NM_004636	TTGGGTAGTGAGCAGTGAGCAGAAAGCTGTGAACAGGCTGGGCTGCTGGAGGTGGGGCGA
A_24_P213763	0.149644	0.0084	3.15064	-2.59907	1.32337	A_24_P213763	BC013798	CACTGTATGTTATTATCTCACCTAAAACAGCTCCTACAAATCTCATAGAAACCTGTGGCT
A_24_P712562	0.191548	0.0138	2.8825	-3.07147	1.32384	A_24_P712562	NM_001085430	ACTGCTTCATTTTACTAACCTGCATAGATCACTAAAACCAATAGCTTAAAGCATAGACAC
A_24_P380022	0.120845	0.00535	3.39419	-2.16825	0.953482	A_24_P380022	NM_020390	AAGATGCACTTTATGGCAATGCATACCAGGCTTTCACCTGCTAGAAACATACTTGTTGCC
A_23_P161190	0.120892	0.00536	3.39362	-2.16926	0.841261	A_23_P161190	NM_003380	TGATTAAGACGGTTGAAACTAGAGATGGACAGGTTATCAACGAAACTTCTCAGCATCACG
A_33_P3352887	0.120903	0.00536	3.39322	-2.16998	0.800311	A_33_P3352887	NR_027002	TTCCCTGTTGAATATGTATATGTGGCCAGCCAGATCAACGTAAATCACTATTCGCCCTCC
A_33_P3231187	0.121415	0.00539	-3.39057	-2.17467	-0.540647	A_33_P3231187	NM_001167	GTGAACTGACTTTAAGTAATCAAGATTGAATTCCATTAGCATCTGCTACCAAGTAGGAAA
A_32_P207428	0.121527	0.0054	-3.38963	-2.17633	-0.630575	A_32_P207428	NM_138374	GACATGAGTCACTTTTCCCACCCTGTATTTTGTTTCTTTAATAAAAACTGTTACGGGTTT
A_32_P204676	0.121527	0.0054	-3.38935	-2.17682	-0.945574	A_32_P204676	NM_001444	TGCGAAAAATGGGCGCAATGGCCAAGCCAGATTGTATCATCACTTGTGATGGTAAAAACC
A_24_P945194	0.121594	0.00541	-3.38842	-2.17846	-0.899039	A_24_P945194	NM_013374	GACGTTTGCAATTATTAGTTGATTCACAGTACAGAACAAGGTATAAAGGAAAAAACCCTG
A_23_P420196	0.121594	0.00541	3.38832	-2.17865	0.671042	A_23_P420196	NM_003745	ACCTGAACTCGCACCTCCTACCTCTTCATGTTTACATATACCCAGTATCTTTGCACAAAC
A_33_P3313055	0.212648	0.0183	2.73012	-3.33747	1.32473	A_33_P3313055	NM_000435	TAATATGGCTTCTGGTCAAAATCCCTGTGTAGCTGAATTCCCAAGCCCTGCATTGTACAG
A_23_P40989	0.251354	0.0263	2.53345	-3.67635	1.32544	A_23_P40989	NM_003940	TGAGATGGAGAATAATGCCAATGCAAACATTATTTCTGAGGCCAAGCCCGAAGGACCTAG
A_23_P44112	0.039755	0.000565	4.65046	-0.0033	1.32616	A_23_P44112	NM_014387	CCTACTCTGTGTAATAGAATAAAGGCCTGCGTGTGTCTGTGTTGAGCGTGCGTCTGTGTG
A_23_P342108	0.121937	0.00544	-3.38539	-2.18383	-0.767183	A_23_P342108	NM_152612	AGGAGCTCTGCTGAGACTCTCAAGGGAGCCAGTGAAAGAAATAGAAATAAAGCCTGTGTT
A_23_P26325	0.047309	0.000832	4.4269	-0.3764	1.32658	A_23_P26325	NM_002987	AAGAAGAGCCACAGTGAGGGAGATCCCATCCCCTTGTCTGAACTGGAGCCATGGGCACAA
A_23_P420373	0.027906	0.000305	5.0145	0.58928	1.32839	A_23_P420373	NM_175630	CAAAAAGTCTTCCTTCCAAGCGTGTATGATGAAATGAGTAAATTGATTAATTGGCGTAAC
A_33_P3363355	0.223471	0.0204	2.67287	-3.43672	1.33109	A_33_P3363355	NM_022377	AATAAAAATAAATATTGGCGGGGGAACCCTCTGGAATCAATAAAGGCTTCCTTAACCAGC
A_24_P349039	0.140494	0.00741	3.21835	-2.47934	1.33159	A_24_P349039	NM_020754	ATGTCACCATAGATAAAAGCCTCATACAAAGGCAGAACTACACTCCAAATTTAATGTGTT
A_33_P3630129	0.123011	0.0055	-3.37886	-2.19538	-0.845103	A_33_P3630129	AK128708	GGCCTCTTTCCTATGCATTAAAATAGAAAATCCTATGGGATTACATTCATGTTTGCTTTC
A_33_P3281303	0.12307	0.00551	-3.37824	-2.19647	-0.756314	A_33_P3281303		AAATGGGTCGAGGATCTGGTGCGGCGTGTTCACTTCATTGCGGACTGGTACGCACATGGA
A_33_P3288969	0.12307	0.00552	-3.37771	-2.1974	-0.912244	A_33_P3288969	XR_132793	GAACCTGGAAAATCACTGTACACTTATATAAGTACCACTTACTTTGTGGCATGAATAAGT
A_24_P142495	0.12307	0.00552	-3.37705	-2.19857	-0.84033	A_24_P142495	NM_030966	CTGCTGCCGCCCATCCTACTGTGGACAGTCCTGCTGCCGCCCAGTCTGCTGCTGCTACTC
A_23_P383422	0.165884	0.0104	3.03651	-2.80061	1.33161	A_23_P383422	NM_139239	ATGCTAATGTTGCAAACCCATGATAATGTATGTGGAATATCCTGCCATTGGGGTTTTACA
A_33_P3415092	0.12307	0.00552	-3.37683	-2.19897	-0.50794	A_33_P3415092	NM_001127899	TTTTCACTTAGCACAGATTTGTAATTATGCATGTAATAAAGCACAGCCTTATCCACCCTG
A_24_P386746	0.220423	0.0197	2.69085	-3.40559	1.33239	A_24_P386746	NM_031491	GAGGACGCTCAGCACCTTCCGAAACTACACTGTGCAGTTTGATGTGGGAGTGGAGTTTGA
A_23_P326931	0.123217	0.00554	3.37547	-2.20137	0.786187	A_23_P326931	NM_145170	GGAGAACGAAAGAATCTTCACTATAAACAGAGACCCATTCATTTATTTCCATTGGCTGTG
A_33_P3263232	0.123244	0.00554	-3.375	-2.2022	-0.831504	A_33_P3263232	NM_030891	TGTACATTGTGTGTGGACTGAAGTGTAGGTATGTAGAGATGCTTCGCCAAACAGATGCTT
A_23_P104073	0.031837	0.000383	4.8792	0.3713	1.33283	A_23_P104073	NM_002960	GGTCTTCTGCGATCAGTTAACCCATTTTACCTAGGAGGCCCAGAGATGTGAGGGCTCCTT
A_33_P3367565	0.005373	6.61e-06	7.58244	4.18382	1.3344	A_33_P3367565	AK023681	CATATGTCGAAGTCTGTTTGGACAAAAATGCCAAAGGTGCTAAGACTTATATTTAATACC
A_23_P140978	0.123489	0.00557	-3.37274	-2.20619	-0.580275	A_23_P140978	NM_005741	TCTTATGAGTCATCAGAGAACTCACACAGGTTAGTAACAGTGGGGTTTCTCTTTGCCCCA
A_23_P78099	0.123489	0.00557	-3.37223	-2.2071	-0.74557	A_23_P78099	NM_000638	TGACTACAGGATGGACTGGCTTGTGCCTGCCACCTGTGAACCCATCCAGAGTGTCTTCTT
A_33_P3306192	0.123489	0.00557	-3.37217	-2.20721	-0.447124	A_33_P3306192	NM_001101362	TTCTCCTAAGGCTGCCTCCTGGCGCTCCTGGGCCTGTGACTTCGACAACGGCAGAACTGT
A_33_P3293164	0.300943	0.0412	2.28731	-4.09022	1.33666	A_33_P3293164	NM_001275	CTTTTGGTGAAAGCTGAGAACTCCTGACTGTAACATATTCTGTATGAACTTTATCTAAAG
A_24_P175176	0.123546	0.00558	3.37121	-2.2089	0.993348	A_24_P175176	NM_020432	AGATTGAGGTTAACTTAGAGTTGGGAGTTGATTTATTAAGTACAGTATACCTCTCAACAG
A_23_P9614	0.186029	0.013	2.91454	-3.01526	1.33677	A_23_P9614	NM_020142	AATGACCAATACAAGTTCCTTGCAGTTTCCACTGACTATAAGAAGCTGAAGAAGGACCGG
A_33_P3387616	0.123955	0.00561	3.36872	-2.21331	0.930568	A_33_P3387616	NM_052924	CAAGGTCACGCAGGTCTCCCCAGCACGTGTTAATTTGGTTAATAAAACTGTGGATCAAGG
A_23_P125977	0.243821	0.0248	2.56592	-3.62084	1.33809	A_23_P125977	NM_172369	GCAGCGGCGTCAAAGTGGTCACCTTCTGTGGCCACACGTCCAAAACCAATCAGGTCAACT
A_33_P3347457	0.280383	0.0346	2.38425	-3.92886	1.33866	A_33_P3347457		TCAGACCTATTTGACTTCTCCTTCTGGGCATTACATGCAGCTCCTTACTCCAGTGGAATT
A_33_P3376454	0.150923	0.00854	3.1418	-2.6147	1.3396	A_33_P3376454	XR_108564	CCTTCCTGGAAGTATTTTTGTTGATGAGTCGTCTGTCATTATTCTCTAAAATGATTTGCT
A_23_P217269	0.056014	0.00115	4.24181	-0.69011	1.33976	A_23_P217269	NM_007268	CTCAGAGGACCAGCTATATCCAGGATCATTTCTCTTTCTTCAGGGCCAGACAGCTTTTAA
A_24_P32394	0.315407	0.0468	2.21677	-4.20611	1.34044	A_24_P32394	NM_032143	TGGGATTGTAGAGGGGCATCAAATCTTAATGAACTTCACCAGCTATTAAGTGACATAATG
A_33_P3240843	0.066183	0.00164	4.04462	-1.02865	1.34054	A_33_P3240843	NM_144649	AAGAGGTCTTCTTTCAGGCAATCCTGCTTGCTGTGTGCTTAATCATTTCTGCATGTGCAA
A_23_P157117	0.314385	0.0462	2.22329	-4.19546	1.34112	A_23_P157117	NM_182898	CTTGGGAAACGCTTTGGTGCTTTTCTCCAGTTTTCTGGTACCAGTTACTTGTTTATAAAC
A_23_P107994	0.124012	0.00564	-3.36567	-2.2187	-0.543643	A_23_P107994	NM_017854	AGCCTGCTCTGGGCGTGCGCCGTGGGCCTCTACATGGGGCAGCTGGAGCTGGACGTGGAG
A_33_P3306619	0.12432	0.00566	-3.3639	-2.22184	-0.64	A_33_P3306619	NM_001128598	CATTTCTTAGAAGAACATGCTGAATTGTCTTTTCAGTGTCTTGCCCTGACAGCGTTTTAC
A_33_P3375145	0.12432	0.00566	-3.36363	-2.22231	-0.679648	A_33_P3375145	NM_203403	CCTAGTGAGGGAATCTAATTAAGATTTCATGCTGTTCTTTGTAATGATAAATGTTTCCGG
A_23_P34375	0.124446	0.00567	-3.36273	-2.2239	-0.872564	A_23_P34375	NM_003196	TGAAGGCGGACGATGATTACAAGGACTATGGAGTCAACTGTGACAAGATGGCATCAGAAA
A_24_P254833	0.294748	0.0394	2.31202	-4.04931	1.34298	A_24_P254833	AB360850	TCAGGTGTGATCCAATTTCTGAACACAACCGCCTTTATTGGTACCGACAGACCCTGGGGC
A_23_P9135	0.294654	0.0394	2.31256	-4.04842	1.34374	A_23_P9135	NM_033655	ACTACCTTCACTGGCATTTCCATAGTCCTGGAATCCAGAGCCAAGTGGCCTATCTAAAAT
A_23_P330999	0.124449	0.00568	3.36146	-2.22614	0.506445	A_23_P330999	NM_015979	GCGTGTTGAAGTCTAAGGTGTTCTGTCATCACACTCTCTTTACTAGAATAAGTGTGCCCA
A_23_P77000	0.030272	0.000353	4.92806	0.45033	1.34498	A_23_P77000	NM_014909	GTTGTACTAGACTTTGTTCAGGCTGTTCTCATCTCAGTATTGCCCCTTCCTTTCACTTTC
A_23_P212050	0.124507	0.00569	-3.36041	-2.228	-0.82761	A_23_P212050	NM_000055	TTCCCCCCAAAATTATCAGTGCTCTGCTTTTAGTCACGTGTATTTTCATTACCACTCGTA
A_23_P214411	0.124507	0.0057	-3.36038	-2.22806	-0.500887	A_23_P214411	NM_006708	AGTGTTTATTTTACAAAAGAGTAGGTACTCTTGAGAGCAATTCAAATCATGCTGACAAGG
A_33_P3266863	0.124507	0.0057	-3.36003	-2.22867	-0.730183	A_33_P3266863	NM_024587	GCATCTTGCATAATTCAGAACTTCATCATCTTGCATAACTGAAACTTTGTGCCTGTTACC
A_23_P162579	0.111815	0.00461	3.47465	-2.02606	1.34505	A_23_P162579	NM_014365	ATGGATACGTGGAGGTGTCTGGCAAACATGAAGAGAAACAGCAAGAAGGTGGCATTGTTT
A_23_P122439	0.037209	0.000497	4.7251	0.11975	1.34528	A_23_P122439	NM_181531	GTTATTGAGGACTTTAAAGAGCTTTTGTTTATTTGGGTTAATATTTATGACATTTGACAT
A_23_P300150	0.147574	0.00819	3.16382	-2.57578	1.34599	A_23_P300150	NM_172387	AGCCTTTCTCAGGGGACTGTCATTGAAAAGGAAACGTTTGATGTCTGTGTCAGCTGTCTT
A_23_P76136	0.20784	0.0172	2.76379	-3.27891	1.34821	A_23_P76136	NM_001080509	AGAGGTCTTAACCTAATGCGCATAGAGAAATTGTTCTCATTGTAAACATACCCCTGTCCT
A_23_P170679	0.318444	0.048	2.20197	-4.23024	1.34971	A_23_P170679	NM_000091	AATGAAGCCATATGAACCAGCTGTCAGTTGCACTTCTAAGACTTTACTTAGCAGTAAATT
A_33_P3210860	0.125417	0.00576	-3.35399	-2.23935	-0.75386	A_33_P3210860	NM_001039886	CGAGGTCACTCCTTGCAGAACATGAGAAAATTCATTTTTGAGATAACTGTTCCCAATGCA
A_23_P148473	0.125417	0.00577	3.35333	-2.24052	0.989711	A_23_P148473	NM_000206	CTTTCCTGTTTGCATTGGAAGCCGTGGTTATCTCTGTTGGCTCCATGGGATTGATTATCA
A_23_P384551	0.125417	0.00577	-3.35327	-2.24063	-0.894677	A_23_P384551	XR_109590	GCTTCCCTTTTAGTGTCAGTGAAATTAATTTAAAAGAAGTTTCCGAAAGTCAAGTGTGTG
A_33_P3269278	0.125417	0.00577	-3.35298	-2.24115	-0.593924	A_33_P3269278	NM_153257	GAATGTGGGAAGGCCTTTAGCTATCATTCAAGCTTCTCACACCATCAGAGAATTCATTCT
A_23_P135164	0.125679	0.00579	3.35151	-2.24375	0.891045	A_23_P135164	NM_207309	GGGCCCTTCTCATAGCTGTTCCTCATGGCCATGACTGGAACAGGGATGCAACCTCTTTCT
A_23_P139123	0.058986	0.0013	4.17584	-0.8029	1.35071	A_23_P139123	NM_000062	GACAACATTTGATCCCAAGAAAACCAGAATGGAACCCTTTCACTTCAAAAACTCAGTTAT
A_33_P3405334	0.125849	0.00581	3.34986	-2.24666	0.888351	A_33_P3405334	NM_000405	GAGTTCTGGGCTCATTTGAAGCCTGGAATAGCAATAAATCTTTTTAACTTGCGGACAGTT
A_33_P3359953	0.133852	0.00668	3.27397	-2.38093	1.35195	A_33_P3359953	NR_037870	CAGCTTTGAGAAGAACTTCAGAGAAGGAGCATCACCTGGTCCTTCTAGAAGATATGGCAT
A_33_P3338166	0.125849	0.00582	3.34866	-2.24878	0.840846	A_33_P3338166	NM_030952	GTCTCTACCTAATGGACCTCCGTGGCCAAAAAGTACCATTAAAACCAGAAAGGTGATTGG
A_23_P208310	0.125849	0.00582	3.34841	-2.24924	0.551692	A_23_P208310	NM_012099	CCCAGCCTCCAGGAACTATCCATCCACTCTTATCTCCATGAGTTCAATTGTTTTGATTTT
A_23_P58729	0.305343	0.0425	2.27043	-4.11807	1.35349	A_23_P58729	NM_003052	GCTGTTTGTGCATAGATGTTGGTGCCTGCGTTACTGAATTTGCACACCTCCTTGCCACCT
A_24_P33982	0.203755	0.0161	2.79916	-3.21726	1.35351	A_24_P33982	NM_001085423	GTGGTGATAATCCTAATTCTGGCTTTTTGGGTACTGCCCAAATACAAAACAAGAAAAGCT
A_33_P3336592	0.091652	0.00314	3.68398	-1.65724	1.35379	A_33_P3336592	AK127052	CAGCCAACAGCAGTATATGGGTCTTATCGGAATATGAAATACTAAAATGTGGGGAAAAAA
A_23_P207911	0.031136	0.000369	4.90154	0.40747	1.35431	A_23_P207911	NM_016113	CAGAGGACAGAGCAGAGGATCTTTCCAACCACATCTGCTGGCTCTGGGGTCCCAGTGAAT
A_33_P3213317	0.264254	0.0299	2.46324	-3.79574	1.35467	A_33_P3213317		GGCTGGCTTGTCTCCAGTTCTTATATCCAAGGTGCAGCAGCTGAGCATTCCAAATTCGGG
A_32_P180315	0.138711	0.00721	3.23281	-2.45375	1.35493	A_32_P180315	NM_020893	TCATTTGAGGAGGAGCTAAAGAGGATCCAGGATGACTGTACATCTCAGATAAAGGAGGCT
A_24_P324640	0.125927	0.00585	-3.34613	-2.25326	-0.540461	A_24_P324640	NM_014480	CTGGGAGCATATTGTCTCCCTGGGGCTTTTCCTTTCCAAATCTGATGTGATCTCTCAGCT
A_24_P109214	0.100812	0.00379	3.58208	-1.83652	1.35582	A_24_P109214	NM_001645	GTTTTCAGAGACATTTCAGAAAGTGAAGGAGAAACTCAAGATTGACTCATGAGGACCTGA
A_24_P390495	0.250385	0.0261	2.53802	-3.66856	1.35633	A_24_P390495	NM_002996	ACATTCCTGATGCTTCTTCAGAGACTCCTGCAGGCAGCCAGGCCACAAGACCCTTGTGGT
A_33_P3400688	0.126256	0.00587	-3.34389	-2.25723	-0.731094	A_33_P3400688	NM_205850	AAGGGGCTGTGGAGGTTGATATTATTAATAGTGTTATGCAGAAAATATGAATGGCAGGGA
A_24_P217330	0.126367	0.00589	-3.34238	-2.2599	-0.546743	A_24_P217330	NM_032806	CCGCCTCACTGTCTCCTGGCAGATCCCATGGAACCTTAAATACCTGAAGGTGAGGGAGGT
A_23_P114740	0.12321	0.00553	3.37586	-2.20069	1.3569	A_23_P114740	NM_000186	TTGGATTAATTTGTGAAAATGTAATTATAAGCTGAGACCGGTGGCTCTCTTCTTAAAAGC
A_32_P137399	0.171443	0.0111	3.00153	-2.86226	1.35894	A_32_P137399	NR_027123	GAAGTCATTAGCTATTCTAGCAAAGTATCTGTCACAGAAAGGTGCTTCATAAAGGTCTGC
A_24_P62783	0.271573	0.0321	2.4239	-3.8622	1.35924	A_24_P62783	NM_004102	TCGATGAGACAACAGCAGATGACAGGAAGGTCAAGTCCATTGTGACACTGGATGGAGGGA
A_23_P351837	0.126367	0.0059	-3.34168	-2.26114	-0.802078	A_23_P351837	NM_001039548	GGGGGTCTCATGAGCAAAATCTTCACCTATGATCCAGGCACAGATGTGTGGGGGGAGGCA
A_23_P26629	0.144182	0.0078	3.19049	-2.52862	1.3605	A_23_P26629	NM_013258	CCCAAGCAAGATGCGGAAGCTCTTCAGTTTCACACCAGCCTGGAACTGGACCTGCAAGGA
A_23_P105307	0.043578	0.000681	4.54253	-0.1826	1.3608	A_23_P105307	NM_201444	GGCTGGAGGGTGCAATTGAGATGGGCCAAATCTATACCAAGCTCAAGAATGCTGGACGTC
A_23_P255896	0.165284	0.0103	3.04066	-2.79329	1.36107	A_23_P255896	NM_001080824	GCAAGGGGCTCTACGCAGACTACCTCTTCAATGCTATTGCCGGAAACTGGGAGCGCAAGA
A_32_P199767	0.126699	0.00593	-3.33869	-2.26643	-0.940525	A_32_P199767	NM_001037735	GCAAAACCTTCTCCCAGAAATCACTCCTCATTATTCATCTGAGAGTTCACACAGGGGAGA
A_23_P328259	0.126699	0.00593	-3.33845	-2.26685	-0.742781	A_23_P328259	NM_033393	AGGTCACTTATTAGTGAAACCTCATTTTAGATCTGACATTGGTAGATAGATGGATTTAGG
A_33_P3590259	0.183413	0.0126	2.92992	-2.98825	1.36247	A_33_P3590259	NM_004887	ACGAAGAATAGGGTGAAAAACCTCAGAAGGGAAAACTCCAAACCAGTTGGGAGACTTGTG
A_33_P3641427	0.261195	0.0289	2.48309	-3.7621	1.36502	A_33_P3641427	NM_016132	CAAGTTTGGGTTTTTAAAGACAGCAAGTCTGGTCATTCAGTTTAAATGAATGGTTATACT
A_33_P3310981	0.076717	0.00219	3.88298	-1.30907	1.36505	A_33_P3310981	NM_013250	AATCATCCCATGGAGTGATTATGACAAGGCTTACCGAAAGTGGACACCCTTCTTCAGATG
A_24_P687594	0.17306	0.0113	2.99235	-2.87842	1.36568	A_24_P687594	AK123675	TATTATTGTCCCATGTACTTTCTAAACTGAGCTTGGAACATTTAGTATTCCTGCAATTGG
A_32_P132317	0.213611	0.0185	2.7254	-3.34568	1.36729	A_32_P132317	NM_001033045	GCAATATCTTTTTCCATGGGAGACCCTAAAAGAAAACCCTGGATCAGAATGATCTGCAGT
A_23_P67424	0.126941	0.00597	-3.33501	-2.27294	-0.731085	A_23_P67424	NM_153257	CACACCATCAGAGAATTCATTCTGGAAAGAAACCTTATCAATGCGGGAAGGCGTTTAATC
A_23_P60079	0.162508	0.00993	3.06003	-2.75913	1.36736	A_23_P60079	NM_001147	CAGTTTACAGACGCTGCTGTCACAACCAAGAATGTTATGTGCAAGTTTATCAGTAAATAA
A_23_P153360	0.126941	0.00597	-3.33455	-2.27376	-0.546707	A_23_P153360	NM_024104	ACCTTGGGTTTCTGAGTCTGCTTTTTGAGTAGGTGATTTTGAGGTTGAAAAACCAGGGGC
A_23_P10936	0.126941	0.00597	-3.33452	-2.27381	-0.614187	A_23_P10936	NM_033060	TGGCCATCAGCTTTATTATCCTGTTATTCCACTAAGTAACTGGTGAAAGGGCATCCATCT
A_33_P3294372	0.208353	0.0174	2.75882	-3.28757	1.36779	A_33_P3294372	NR_036480	TGATCCTTTGTGCAGCGGCTGCTGGCCTCTCAAACTTAATGTGTTCATTGCGGAACTTGC
A_33_P3369939	0.127323	0.006	-3.33222	-2.27788	-0.551959	A_33_P3369939	NM_194283	CACTCTTCAAAAGTGAGAACCCCAAAGAGTTTTCATGTATGTGGGTTAAATCTATTGATA
A_32_P846696	0.140065	0.00732	3.22487	-2.4678	1.36822	A_32_P846696	NR_027000	GTCAACTCTGTTTCGGAGACATAACGATTTGGATTGCTAACAAGTCAAGAAATGTTCAAG
A_33_P3253234	0.127417	0.00601	-3.33115	-2.27977	-0.56977	A_33_P3253234	NM_001243197	TCAGAGTGCGTGTTGCTGTGTACAAAGGAATTTCCATCAATAAAAGCTGATCTCTTCTCT
A_23_P109913	0.019846	0.000159	5.41242	1.21423	1.37284	A_23_P109913	NM_006564	TCAGAAGGCTCTTCTGACTACTGGGCAAAGAGTGTAGATCAGAGCAGCAGTGAAAACAAT
A_23_P21943	0.127512	0.00602	-3.33007	-2.28167	-0.889334	A_23_P21943	NM_018666	GTAATGTCTTTGGTGGAAACTGTGCCAAATACACCACAAATATCTCCTGCCATGGCAAAA
A_23_P387471	0.078518	0.00231	3.8539	-1.35977	1.37422	A_23_P387471	NM_005931	TATGCATTACTCTGTGTCTACTATTATGTGTGCATAATTTATACCGTAAATGTTTACTCT
A_23_P140154	0.127699	0.00604	-3.32839	-2.28466	-0.534069	A_23_P140154	NM_001098621	TGGGGCAGAGGCTTTTTAAAAACATGTGATTAGGGAGCTATCTTTATCTGAATAATAACG
A_24_P497186	0.127699	0.00605	-3.32794	-2.28545	-0.61229	A_24_P497186	NM_182972	ATGTCACAAAGCTACTTACTGTACATGCTGGCAGTATCAGATTTCAAATCCTAATATTTC
A_23_P19226	0.113881	0.00479	3.45439	-2.06185	1.37558	A_23_P19226	NM_013352	GCAGTTCTTCTCATAGATAGCTGTATTTTATTATGGTTGTACTCTTCTTGTTCCCAATCA
A_23_P106761	0.116404	0.00494	3.43736	-2.09194	1.37639	A_23_P106761	NM_007074	TATCTCTCCATGTTCAGTTCCAAGGAGTCCCAGCGGGGCATGGGCTACATGCCCAAACGT
A_23_P376735	0.127699	0.00606	-3.32701	-2.2871	-0.689764	A_23_P376735	NM_153219	GTCTTCCCGTTGTGGGAGCAGGTGGAGGGTGGAGACCTAAACTTTGGGGTCCAGCTGCCT
A_33_P3248394	0.127699	0.00606	-3.32693	-2.28723	-0.713644	A_33_P3248394	NM_001199219	TCTGTCACCAATGCTGCCAACAATGGGGTCTGCTTCATTGTGGCTCGCAAGAAGCCTGGG
A_23_P314145	0.127903	0.00607	-3.32574	-2.28934	-0.748615	A_23_P314145	NM_005715	GGTACTTTTACCTGTGTGTTCAAAGGCATTTCTTTTCAGCAGTGATCATTATAACTTCAC
A_24_P165423	0.128875	0.00615	3.31922	-2.30087	1.37755	A_24_P165423	NM_052960	AAGGAGACAAACTCCACCTGGAAATGTTCTGTGAAGGTCAAGTGTGCAAACAGACATTCC
A_23_P20532	0.128061	0.00609	-3.3244	-2.29171	-0.857939	A_23_P20532	AK024257	ACTACCCTAGATGAGCTGTCCTGCTCCAGTAACATTCTTTTTCTAAAATCATTTATAGTA
A_24_P14260	0.128337	0.0061	3.3229	-2.29436	0.782833	A_24_P14260	NM_014959	CAGCGCAATGAATGCTCAAGTTGGGGTTGGGCGTTAGAATTCATAAAAGTCTTTATATGC
A_23_P13907	0.117481	0.00504	3.42627	-2.11155	1.37761	A_23_P13907	NM_000618	CAAGTAGAGGGAGTGCAGGAAACAAGAACTACAGGATGTAGGAAGACCCTCCTGAGGAGT
A_24_P351283	0.128449	0.00612	-3.32172	-2.29645	-0.930945	A_24_P351283	NM_018000	ACTCTTTGTTGTCAGTGACTAAACTCAGCACCATCAGTGATTCTAAAAACACAAGGAAAG
A_33_P3334491	0.120411	0.00529	3.40083	-2.15653	1.37866	A_33_P3334491	NR_026789	TTGACTACCACACAAATGAATCCATTCAAATGTTGGCAAGTGGAGCAGAGTCCCAGGACA
A_33_P3232458	0.088158	0.00292	3.72402	-1.58698	1.37984	A_33_P3232458	NM_024692	CCTATCGGGGAATTAATGGGTCAAAACTTGTGGATGAGAATTGTTAAGCTTCTAAAATAT
A_23_P206293	0.178275	0.0119	2.96055	-2.93441	1.38056	A_23_P206293	NM_153837	AGGCTCTGAGACTTTACTGGCCTATGCCTGAGGCCTCTTTTCCTTTAACTCCCTAAATTA
A_33_P3382324	0.154043	0.00888	3.12053	-2.65229	1.38102	A_33_P3382324	NM_012217	ATCATCGTGCACCCACAGTTCTACATCATCCAGACTGGAGCGGATATCGCCCTGCTGGAG
A_33_P3416687	0.129075	0.00616	-3.31747	-2.30397	-0.587254	A_33_P3416687	XR_133123	AGAACTGGACCTTGCTCAGAGAGTCTTGTACAGGGATGTAATGCTGGAGAACTATAGGAA
A_33_P3256031	0.043426	0.000676	4.54653	-0.17593	1.38231	A_33_P3256031	A25970	AAGCAGAAAGCTAAGAAGCCACCGGAGCTCATGTTTGTCTACAGCTATGAGAAACTCTCT
A_33_P3247042	0.114487	0.00482	3.45037	-2.06895	1.38285	A_33_P3247042	NM_002030	GGCTTTCTGGGGCTTTCTCTTTTTAAAGTCAGACTGTTGAAGGTTTCTTCTATTCTTATT
A_33_P3343432	0.129251	0.00618	3.31574	-2.30703	0.789948	A_33_P3343432	NM_053055	TTGCCTTCATATAAACGTACACCTACTGAATGGATTCAAGACTTCAAAACCCATTTTCTT
A_33_P3368675	0.129334	0.00619	-3.31506	-2.30823	-0.602905	A_33_P3368675	NM_001029863	GGACAAGAAAATCCAAGTAGCAAATGACCATTATGTGTAAGACTTACTCTAAAAAGACCA
A_33_P3214436	0.309544	0.0442	2.24867	-4.15387	1.38428	A_33_P3214436	NR_023349	TATTGGCGTGCCACTTTTGAAGAAGGAAAATACTTAGCTACATTAAAAGATTTGCATTGA
A_33_P3265030	0.129446	0.00621	-3.31366	-2.31071	-0.483879	A_33_P3265030	NM_000407	AGACCCTGCTGCGTCTCCCTTCCAAACTCTGGTGCTGAATAAACCCTTCTGATCTGGTCT
A_23_P34757	0.129446	0.00621	3.31331	-2.31133	0.504226	A_23_P34757	NM_018040	CTATTGTAACCCAAAAGACCTACCATCGCATCAGTGAAGTCCGAACACATCTTTGTTTGA
A_23_P101811	0.129446	0.00622	-3.31309	-2.31173	-0.687813	A_23_P101811	NM_021030	TATGAAAGGAGTCAGAGTGGGGTGAAAGTCTATAAATGTAAGACATTTGGGAAAGCCTTC
A_23_P30254	0.103329	0.00399	3.55395	-1.88611	1.38461	A_23_P30254	NM_006622	GAAGCTCCCATGTTGTTTAAAGGCTGTAATTGGAGCAGCTTTTGGCTGCGTAACTGTGAA
A_33_P3412438	0.140494	0.0074	3.21846	-2.47914	1.38481	A_33_P3412438		TGTAAGAGGGGGTGTCGGCTGCTCTCCATAGCCAAGTGGCTGCAAAAATCATCATACTGA
A_33_P3213910	0.129446	0.00622	3.31228	-2.31315	0.605391	A_33_P3213910	NM_181720	TGAAAAGTTGGAAGCAAGTCCAGCCTCAAGTCCCCTGGCAGACTCAGGCCCAGACGACTT
A_33_P3308481	0.108411	0.00438	3.50306	-1.9759	1.38483	A_33_P3308481	NR_002768	CTGGACTCTGTTCTTTCCACTTGGACTAATTATCCATTCTTGCATCAGTACCATACTTTT
A_23_P133438	0.038127	0.000527	4.69159	0.0646	1.38544	A_23_P133438	NM_019018	TCAGCATGGAAGGAATTAGGACCTTTTCTTCAGGATTACAGGTACACTGGATGCAGCCAT
A_33_P3375348	0.129565	0.00624	-3.3108	-2.31578	-0.762235	A_33_P3375348		CAGAATCTTCAAGTTCCGGGCACAGTATAATGGGACCCCTGTCCTCGGCTCAGAAGGGAT
A_33_P3223056	0.096013	0.00339	3.64199	-1.73105	1.38554	A_33_P3223056	NM_030957	CACACACTCCTGCCAGGAAGCCCTACATCAATAAAGTTCTGTCTTGTGTAGATTTCTACG
A_23_P159688	0.129684	0.00625	-3.30964	-2.31782	-0.596482	A_23_P159688	NM_002536	CAGTAGAAACCACTTATTTACCTTCTCCATCTCACTAATATGGACAAACAACAAGCACTC
A_33_P3393801	0.041997	0.000635	4.58252	-0.11597	1.38802	A_33_P3393801	NM_005764	AGGCAGATGGAGTCCTGGTGGGAACAGATGGAAGGTACTCTTCGATGGCGGCCAGTTTCA
A_23_P165521	0.130353	0.00629	-3.3062	-2.32391	-0.879259	A_23_P165521	NM_003162	CTGACGCACTGGCTAAAGTCTTTGTATGACGCAATGCATCATCTTCACCTTCTAGCTGTT
A_24_P269129	0.130452	0.00631	-3.30505	-2.32594	-0.832263	A_24_P269129	NM_153746	CTCTCAGGATTCCACACCTACTTGATCAGCTCCAACCAGACAACAAATGAGGACATTAAA
A_24_P109554	0.130452	0.00631	3.305	-2.32603	0.89645	A_24_P109554	NM_007018	AAGGCAACAAGATATCATCGCTCCAAGATATAAGCAAGTTGAAACCGCTTCAAGATTTGA
A_23_P62901	0.130452	0.00631	3.30481	-2.32637	0.746921	A_23_P62901	NM_006763	TTTTAGAAGCAGCCTCATGGTCTCATGCTTAATCTTGTCTCTCTTCTCTTCTTTATGATG
A_23_P22660	0.016935	0.000112	5.62953	1.54475	1.38831	A_23_P22660	NM_006639	GGCCAAACCACAAAAAGATGAGAAAAATAATACCAAGTGCTTTGAGCCCCCACAAGACAA
A_23_P31721	0.130549	0.00632	3.30372	-2.3283	0.892059	A_23_P31721	NM_001951	AGTTCACTGATTCTGAAGTGTTCTTCCCTAATACTTTCTTTACTTCACAAAACTTCAACC
A_23_P125837	0.130549	0.00633	-3.30342	-2.32882	-0.454308	A_23_P125837	NM_016500	ACCAAAGTAGATGACCAAATTTACTCTGAGTTCCGGAAAAATTTTGAGACCCTTAGGATA
A_33_P3270509	0.130694	0.00634	-3.3025	-2.33046	-0.674828	A_33_P3270509	NM_003031	ACAGAAAATAAGGCACCCATCTGTCTGCCAACCTAAAACTCTTTCGGTAGGTGGAAGCTA
A_33_P3263027	0.130811	0.00635	-3.30169	-2.33189	-0.580532	A_33_P3263027	BE266556	TTCATCTCCTGAAATGTAGACATTTAATAGTGAGCTTCTCCCCTTGACCTCATCACTCTG
A_24_P161959	0.130825	0.00635	-3.3013	-2.33257	-0.542494	A_24_P161959	NM_199337	CCATCATCTCCTTGAACACTACAATTAGCTGTTCTGAAGCCCAGAAAATTCCATGGACAC
A_33_P3261737	0.131134	0.00637	-3.29949	-2.33578	-0.510853	A_33_P3261737	NM_005660	TACACCTTGCAGAATAACCTCCAGTATGTTGCCATCTCTAACCTACCAGCTGCCACTTTC
A_23_P203972	0.204679	0.0162	2.79552	-3.22362	1.38897	A_23_P203972	NM_007197	CTTCACAGTGCCAGGAAAGAGTGGTTTCTGCGTGTGTATATTTGTAATATATGATATTTT
A_23_P150609	0.25389	0.0269	2.52075	-3.69803	1.39059	A_23_P150609	NM_000612	CTCAACTCAGCTCCTTTAACGCTAATATTTCCGGCAAAATCCCATGCTTGGGTTTTGTCT
A_24_P73389	0.131134	0.00638	-3.29872	-2.33714	-0.946113	A_24_P73389	NM_001032296	GGACTGGATCTTCACAATCCGAGAAAAAGATCCCAAGAATCTCGAGAATGGAGCTCTTCA
A_32_P94160	0.290503	0.0377	2.33687	-4.00802	1.39129	A_32_P94160	NM_006252	CTGATAGGATGAGTATCTTGATTTTTAGGTAAGATCACAGTTTCACAAATTGTGGTGTTG
A_24_P194881	0.048837	0.000909	4.37664	-0.46118	1.39135	A_24_P194881	NM_001080420	GTTTGGAGTCTGGACTAAGCTCCATCCACGTCACTCACAAGTTTCTGTTTATATTTCTAG
A_33_P3372389	0.131419	0.00641	-3.2963	-2.34143	-0.677691	A_33_P3372389	NM_015102	GAACATCATGGCCAAAGACTGTGTATTTCACCTTCCAGTTCTACCGCTTCCCACCCGCAA
A_23_P425880	0.131419	0.00641	3.29599	-2.34197	0.812609	A_23_P425880	NM_007118	ACTTCCTTCATTGAGCGGCGCAAACACCAGAATGATGTTCGACCTATCCGTAGCATTAAA
A_23_P156788	0.131419	0.00642	3.29556	-2.34274	0.813014	A_23_P156788	NM_003764	GGAGCTCTGCCCTGCAGGGAGTTGCCCCAACCCTTTCCGGAACTCAGTCTTTAGAAAAGA
A_33_P3241316	0.131419	0.00642	-3.29521	-2.34335	-0.93175	A_33_P3241316	NM_213600	TGCAGGAGCTCGGCCTTCTAGACACTGTGACCTACCTGAGTGGGGTCTCTGGGTCTACCT
A_33_P3412603	0.131419	0.00642	-3.29521	-2.34335	-0.850402	A_33_P3412603	AK125205	TTTAAAGGTTTTTAAAATGCAGTTTCTCCAGCCGGAGAATTCCCACCCATTCACCAGCCC
A_33_P3380944	0.120411	0.00528	3.40153	-2.15529	1.39176	A_33_P3380944	NM_001098518	TACATTAAGAGTTTTGCATGGTCTAAATTGTGTTTATTCCAACCACGTGGAAAGCTCCTG
A_33_P3340264	0.040185	0.000583	4.63233	-0.0333	1.39385	A_33_P3340264		ATATGGTAATTCAGGAAAGGATTTGGAAGACCTAAGCCTGTACCCTTACCCCAAGGCAAC
A_23_P318464	0.131462	0.00644	-3.29413	-2.34527	-0.567458	A_23_P318464	NM_020526	ATATATTATATTACTATATAGCCGAGCTGTTCTTCCTTCCTATGGAAGTCGGAAACATGG
A_33_P3348362	0.13155	0.00645	-3.29344	-2.34648	-0.489883	A_33_P3348362	NR_027263	GCCACTACCAGCCTAACTTTAGGAACTGTCGTCCACCTGGCTTTTATTATACTGCCTTAA
A_33_P3307363	0.145869	0.00801	3.17634	-2.55363	1.39439	A_33_P3307363	NM_012302	GAGCCCATCACTAATATCCAGTGTAAAGTTTAACACGGTTTGACAGTAAATAAATGTGAA
A_23_P35916	0.131704	0.00646	3.29216	-2.34874	0.757744	A_23_P35916	NM_000051	ACGTGTCTTAATGAGACTACAAGAGAAACTGAAAGGAGTGGAAGAAGGCACTGTGCTCAG
A_33_P3246418	0.173541	0.0113	2.98938	-2.88366	1.396	A_33_P3246418	NM_005586	AGGGGAAAGGAAGGGAAGGGAGGGAGGGTCTGTTCTATCTGTTGCTGTAAATAAAGATAT
A_33_P3401169	0.131881	0.00648	-3.2907	-2.35134	-0.951038	A_33_P3401169		AATAATCAATGAGCGATTTTCAGCCCAATGCCCCCAAAACTCACCCTGTACCTTGGAGAT
A_33_P3235925	0.131881	0.00648	3.29025	-2.35214	0.401104	A_33_P3235925	NM_024653	TGATGAGTTTGGGGCTGGTTTCTGGGAAGGGAACGTTTATTTAGTAAAGAGCAGAACACC
A_33_P3240094	0.131881	0.00649	-3.28959	-2.3533	-0.736723	A_33_P3240094	BC073962	GTGCTCGATACTGGCTTCTCTACTTCCAGATGTTTGGAATGTTCCATAATAAAATATAAA
A_23_P41942	0.144038	0.00775	3.19383	-2.52272	1.39718	A_23_P41942	NM_006467	CTGGTATAACTGGTTCTGATGGCTGGGAATAAAGGAAGAGGACGTGCTGCTTATACCTTT
A_23_P64611	0.266813	0.0306	2.45012	-3.81795	1.39787	A_23_P64611	NM_176798	ATGCGGAGAATTAGAGTTCAGCTCAGCTGGGCATGGAGTTAAGATCCCTCACAGGACCCA
A_23_P119362	0.053636	0.00107	4.28416	-0.61797	1.39864	A_23_P119362	NM_001425	TGTTCATGTTCCAGCTCTACACCATGCGACGAGGAGGTCTCTTCTATGCCACCGGCCTCT
A_33_P3228499	0.131926	0.0065	-3.28867	-2.35493	-0.994952	A_33_P3228499		CCTAGAGAAGGACTACTTCGGCCTGACCTTCTGTGATGCTGACAGCCAGAAGGTACCTGG
A_33_P3295056	0.05171	0.000997	4.32382	-0.5506	1.3997	A_33_P3295056	NM_005608	AATGACCTTGAGCGACAGGAGGATGAGCAGGACACAGACTATGACCACGTCGCGGATGGT
A_33_P3272442	0.149767	0.00842	3.14926	-2.60152	1.40007	A_33_P3272442	XR_108694	CCATACCCCTTGATTCAACAACTTAGCTTCTTGGAATTATCCATATAGAAATGCTTACAT
A_23_P21134	0.132714	0.00656	-3.2842	-2.36284	-0.753547	A_23_P21134	NM_004083	GGAAGTGTATCTTCATACATCACCACACCTGAAAGCAGATGTGCTTTTCCAGACTGATCC
A_33_P3242659	0.132714	0.00656	-3.28417	-2.36288	-0.773042	A_33_P3242659	NM_022113	TTGACAGATTCTTCTGCTGGAGAGCTTTCCAGTAGGAGGAGTCTACCAAATAAAACAGGC
A_23_P132027	0.155979	0.00911	3.10644	-2.67718	1.40232	A_23_P132027	NM_003116	CGATTTCGCGGTCTTTGGCCTCCAGGTTTATGATGAAACTGAAGTTTCCTTGGGGAAATT
A_23_P76969	0.132804	0.00657	-3.28317	-2.36466	-0.612006	A_23_P76969	NM_015556	AGTGAGTGTCCTGCAGCCCTTATTCCCTCCATAGAAAGCATCCTCAGAGCACCTTCCCTG
A_33_P3241661	0.278841	0.0342	2.39065	-3.91812	1.40518	A_33_P3241661	XR_109642	CTGCTACTGTGTGTTTGCTGGTTCCAATGATACATAATTTGTGCTTTTCGTAATTAAAGT
A_33_P3295786	0.082598	0.00263	3.78163	-1.48604	1.4054	A_33_P3295786	NM_001042693	GAAGCCTCTGTACCCAACCCTGACCTATGTGGACCAGTCCCATAAACATTCAATAAATGT
A_24_P751074	0.229184	0.0216	2.64055	-3.49255	1.40565	A_24_P751074	NM_005238	ATGCCGGAAACTCTCCTTCTGTGAGTATAACTCCTGAGTTCCTATAGCAGATAAGATATA
A_23_P99163	0.133041	0.0066	3.28093	-2.36863	0.85614	A_23_P99163	NM_018370	CCTCACGATGGAGTTTCATGCTTCATTTTCACATCTCTCTGCACAATTAGATTGGGAGCT
A_23_P163353	0.133055	0.0066	-3.28055	-2.3693	-0.700581	A_23_P163353	NM_016166	AGCTCCACATTGGAGCATCAGGTAGCGTCTCACCACCAGTCCTCAAATAAAAACAAGAAA
A_24_P117410	0.115484	0.00488	3.44378	-2.0806	1.40581	A_24_P117410	NM_138433	GCTCAGGGAAGGGGCTGGGATCGGAACTTCCTGCTCTTGTTTCTGGACAACTTTCCCCTT
A_24_P349466	0.133164	0.00661	-3.27947	-2.37121	-0.72532	A_24_P349466	NM_001005354	GTGGACAAGAAGATGCAGAAGAAAATGAAGAAAGCTCATAAAAAGATGCACAAGCACCAA
A_33_P3398667	0.133363	0.00663	-3.27817	-2.37351	-0.937902	A_33_P3398667	NM_001166012	AATAATATCTGAGGCAGTAAAATAGTACCTGAGGAATGGTGCCTCATTCTGCCCCCTTGC
A_23_P363878	0.13191	0.0065	3.28906	-2.35423	1.4068	A_23_P363878	NM_144629	AACCCTGTACTGATTCATTGCACATAAATGTTGTTGCTCCTAAAAGCCTAAAAATGCAGA
A_23_P393531	0.126367	0.00589	3.34203	-2.26052	1.4079	A_23_P393531	NM_004027	GTGCGGTTAAATTCCTACTTTGAGCAGTTTAAGGAAGTTTTGCCTGAGGATTGCCTGCCT
A_24_P150791	0.133435	0.00665	-3.27687	-2.3758	-0.69157	A_24_P150791	NM_020655	CATATCCAGCCCCCTAAAATGTACAATGTAACTTGTTCAGTCCAACAAAAACAGGTTCCT
A_23_P354151	0.100189	0.00373	3.59102	-1.82078	1.40841	A_23_P354151	NM_005546	TTGAACACTTCATGAGGAGGGACATTCCCTGATATAAGAGAGGATGGTGTTGCAATTGGC
A_33_P3299421	0.133613	0.00666	-3.27574	-2.37781	-0.606881	A_33_P3299421	NM_020880	CACTTACCAGGAACTGCCTGTTAACTGGCTTGTGCAATGATAAAGGCCTTTTGTTTAAGT
A_33_P3333985	0.133641	0.00667	-3.27531	-2.37857	-0.894358	A_33_P3333985		CCAATTTTTTGTAAAACAGAAGTTCCAGAGCACAGAAGGTCATCATCACAAGCAAAATTT
A_24_P194819	0.118256	0.0051	3.41975	-2.12308	1.40852	A_24_P194819	XR_108978	GGATCATCACCCATCCAGACTTTGAGAAGCTCCACCCCTTTGGGAGTGACATTGCCATGT
A_24_P385585	0.133852	0.00669	-3.27356	-2.38166	-0.81843	A_24_P385585	NM_152834	GTTCTGTTAGGACAGGCATACTGTTACTTTGCAATATCCACTTTATAAAATAGCTCCTGC
A_33_P3215178	0.133852	0.00669	-3.27351	-2.38176	-0.791513	A_33_P3215178	NM_148920	AAGCTGTTCCTTGGGGAGCTCATCTACCCCTGGAGGCAGAGAGGGGACAAGCAGGACTGA
A_23_P304110	0.133931	0.0067	-3.2726	-2.38335	-0.887527	A_23_P304110	NM_175873	ACTTAAGGCAGTCTTTCATGGAATGTTTTGATTGAGCAATGAAATAAACAGTCCTCCATT
A_24_P114249	0.133931	0.0067	-3.27255	-2.38345	-0.463966	A_24_P114249	NM_004482	ATTTCAAATGCAGAATACTTGACTCATTTAAAGCTAAATTTTGTTACTGATTCAATTATA
A_33_P3783812	0.134108	0.00671	3.27152	-2.38527	0.663757	A_33_P3783812	AK022255	ATGTGATGTGATTCATGTAACAAGTGCTTCTGCCTTAAACCCAGAGTCTGTGCCTTGGCT
A_33_P3317548	0.134253	0.00672	-3.27062	-2.38686	-0.726239	A_33_P3317548		AAACAATTCGTAAGTTTTAAATTGCACGCTGTGATGAAATCTCGCGCTGTGCAGCCTGGG
A_23_P76529	0.042751	0.000654	4.56558	-0.14417	1.40991	A_23_P76529	NM_000889	CACCCTACTTCATTTTCAGAGTGACACCCAAGAGGGCTGCTTCCCATGCCTGCAACCTTG
A_23_P114057	0.134675	0.00675	3.26829	-2.39098	0.909083	A_23_P114057	NM_017789	CCTAGGAGGAGGGCTCCTAACAGTGTAACTTATTGTGTCCCCGCGTATTTATTTGTTGTA
A_33_P3233404	0.31687	0.0473	2.21064	-4.21611	1.41014	A_33_P3233404	AB305916	AAGAAAAAGGAGATATTCCTGAGGGGTACAGTGTCTCTAGAGAGAAGAAGGAGCGCTTCT
A_33_P3351686	0.1347	0.00676	-3.26733	-2.39268	-0.90569	A_33_P3351686	NM_001114938	TGTACAGACACTGGCAGAGATCAATCCAGCAAGTGTCCATGAGTACCAGTACCCACCTCC
A_33_P3212232	0.056103	0.00116	4.23611	-0.69985	1.41121	A_33_P3212232	NM_001039396	TTCAAGAAGAAAGCATATCAGGCAATTGAGGAAAGGCAGAGTTTGGTTCCAGGCACTGCA
A_23_P205778	0.28049	0.0347	2.38246	-3.93185	1.41179	A_23_P205778	NM_016194	TCACATGTAAATAGATATTACTTCTAGAGGAGCTTAGAGTTTATTGCAGTGTAGCTTAGG
A_32_P22401	0.1347	0.00679	3.26566	-2.39564	0.589764	A_32_P22401	NM_018067	CTTGATTTGGTGGGGTACAGTGGATGTGAATACTGTAAATAGCTTGTGCTCAGACTCCTC
A_33_P3340990	0.1347	0.00679	3.26502	-2.39676	0.61744	A_33_P3340990	NM_001012398	GTTCTTTGCCATTTATGCAGGAAACTACCCTTTTCTCAACATAAACAAACAAAGGCTAAT
A_23_P34644	0.154121	0.00889	3.11986	-2.65348	1.41197	A_23_P34644	NM_004001	AATCCCACTAATCCTGATGAGGCTGACAAAGTTGGGGCTGAGAACACAATCACCTATTCA
A_23_P310931	0.237912	0.0232	2.60152	-3.55974	1.41448	A_23_P310931	NM_001841	CTCTGGAGCTATGAAAGGCCCCACTTTCAAGTCACCCTTGCCACTGAGGACCGAGGACTA
A_24_P115511	0.1347	0.0068	-3.26416	-2.39829	-0.857336	A_24_P115511	NM_016322	CCCGTATCTTAACGGTTCACGTCTAGCCAAATAACTGTTTTGGAATAAAAACCTTGGTGG
A_23_P386320	0.126941	0.00597	3.33495	-2.27305	1.41507	A_23_P386320	NM_033316	GCAGTGAAAGCTTTCATGACCATACAAATTATCTTTTTTCTTCCTATTTCCTTGTAGAGG
A_24_P943301	0.255141	0.0272	2.51548	-3.707	1.41541	A_24_P943301	NM_001080471	CTGCTAAGATAGATGAGCCATCTGTATGCTCTGACAGTTACAGACTGAATAAGTTGGAGA
A_23_P205370	0.088153	0.00292	3.72463	-1.58589	1.41655	A_23_P205370	NM_016150	CTCCACTTGTTCTGGAAAACTCACCACTTGACTTCAGAGCTTTCTCTCCAAAGACTAAGA
A_33_P3300212	0.1347	0.00682	-3.26328	-2.39985	-0.444511	A_33_P3300212	NM_001167820	TGGGGAAACTGTTTCCTGTACCACTGCTCCGATTCCCCGCTTCCAGAATCGGCGCATGAT
A_23_P34852	0.1347	0.00682	-3.26301	-2.40032	-0.599095	A_23_P34852	NM_007272	TACGTGTGGCGGGACTTTGATTGATAGCAACTTCGTCCTCACTGCCGCCCACTGTATCAG
A_24_P96961	0.140357	0.00736	3.22163	-2.47354	1.41928	A_24_P96961	NM_025106	GCCTTGTGGCTTGTACAGTTTTGAAACTCCCGTTCTATTTTATGATGGTTGATAATAGTC
A_24_P85775	0.019688	0.000154	5.43173	1.24393	1.41958	A_24_P85775	NM_001039477	TGCTTCTCAGGGAATCCGACACCAGCCAACCATTTTAAGCCTCTAAAAGACCTCGGGCAA
A_23_P212792	0.1347	0.00682	3.26285	-2.40061	0.685935	A_23_P212792	NM_025009	GTGTATTAGGATGTGGGCTGGTTTGCTTTTCTACCACCTTTGTAATTTTATGTATCCCAT
A_23_P117602	0.134718	0.00683	3.26199	-2.40213	0.982945	A_23_P117602	NM_004131	AACCATGAAACGCTACTAACTACAGGAAGCAAACTAAGCCCCCGCTGTAATGAAACACCT
A_33_P3391387	0.134718	0.00683	-3.2617	-2.40265	-0.532704	A_33_P3391387	NR_026682	AAGGGATTGAGACCTCCAGTGGCCTCCCACATTGTTTCCGGCAAGAATTTAAAAATTATT
A_33_P3239278	0.134718	0.00684	-3.2614	-2.40317	-0.919977	A_33_P3239278	NM_001004705	TTTCCTGCTCCTGGTGTCCTACATAGTCATATTATCATTACCCAAGTCTCAGGCAGGAGA
A_33_P3218832	0.319238	0.0484	2.1978	-4.23703	1.41976	A_33_P3218832	NM_014989	CCACTTGTCTTAACACTCCCCTGTGCTTTTAAATGAAATTCCAATTCATGTATGTAAACA
A_33_P3398195	0.134718	0.00684	-3.26122	-2.4035	-0.747367	A_33_P3398195	NM_012315	TCTTGGAACAGCACAGCCTGTGGCTCCGCCCCAAGGAACCACTTACACAAAATAGCTCCG
A_23_P369815	0.13474	0.00685	3.2608	-2.40423	0.908252	A_23_P369815	NM_000639	AAGCAAGAGAGATGTTTTGGGGACTCATTTCATTCCTAACACAGCATGTGTATTTCCAGT
A_23_P392076	0.13474	0.00685	-3.26051	-2.40476	-0.519808	A_23_P392076	NM_014574	GTATTTGTATGAATCAACAAAAACTTGCATCGTAACAAGATTTGCTTGGACAGAAAGAGG
A_33_P3285260	0.135208	0.00688	3.25817	-2.4089	0.792072	A_33_P3285260		AGAGGGAGGAGCCCATGGCCCTTTCTTCTGTGACTGATTAAAAATCTCGATGAAACAAGA
A_23_P106773	0.135208	0.00689	-3.25752	-2.41004	-0.70576	A_23_P106773	NM_177528	AGAGGGAGTGTGCGAATCAAGCCTGACCAAGAGGCTCCAGAATAAAGTATGATTTGTGTT
A_33_P3211924	0.135208	0.00689	-3.25745	-2.41016	-0.375702	A_33_P3211924	NM_015156	GTGGTGAATGTTCATAGCATTATAACTGCTTAGCCATTGAATGATAACATTTGTTAGTGG
A_33_P3359157	0.135208	0.00689	-3.25739	-2.41027	-0.711744	A_33_P3359157	NM_006589	TTCCTCCAGATATCCAGGAAAGCCCCAGACCCCAGTGGGACTGGAGCTCATGGACATAAG
A_33_P3415500	0.135427	0.0069	3.2562	-2.41237	0.881125	A_33_P3415500	AK131423	GGCGTAGTTAAGCTTTGCAGCTTCCAGTGTATTTTATTTATTCTTTTGTTGGGTTTTTGT
A_24_P228717	0.105284	0.00414	3.53326	-1.9226	1.42133	A_24_P228717	NM_002872	CAAGGAGATTGACTCGGTGAAATACCTGGAGTGCTCAGCTCTCACCCAGAGAGGCCTGAA
A_33_P3282213	0.085619	0.00277	3.75285	-1.53643	1.42137	A_33_P3282213		TGTCTTCTCGTTCCCACGCGAGTACAGGTTGGACAGCAGCTCTGAGAAGATGAACTCCTT
A_23_P205623	0.135495	0.00692	3.255	-2.4145	0.513627	A_23_P205623	NM_030637	TTGGAGGAATGTTGTTCTCAAGATTTGGACGTTCATCTACAACACAGTCATCTGAAACAT
A_24_P205130	0.012014	5.19e-05	6.12751	2.27442	1.42263	A_24_P205130	NM_015033	TCATTGCAGAAGAAAGTTTACACGACGTCAAAAAGTGACGTTCATGCTAAGTGTTTTTCC
A_23_P216307	0.242262	0.0244	2.57518	-3.60496	1.42286	A_23_P216307	NM_004349	TGGTAGTAAAACACAGAGGGCCAGTAACGGGTCGTAATGACTTATTGTGGATAACAAAGA
A_33_P3214745	0.136075	0.00696	-3.25177	-2.42022	-0.823562	A_33_P3214745	NM_001024680	AACAACATTCTCTTCTGCCCATTTACTCTTAACAAAAGAAAGGGGCTGTGCGCCATGGCT
A_24_P29686	0.136075	0.00697	3.25146	-2.42077	0.609561	A_24_P29686	NM_031449	TCACAAACACCTCTCAGAAACAACGTGGGATGAAAAAGCAAGACAGTTCATACAGTATGA
A_23_P118061	0.136159	0.00697	3.25081	-2.42191	0.732839	A_23_P118061	NM_181641	GCACAAGCCCCTGAACCATATATTGTTATCACTGGATTTGAAGTCACCGTTATCTTATTT
A_24_P206343	0.062162	0.00144	4.11528	-0.90688	1.42321	A_24_P206343	NM_033054	CTGCCACTGACAATCCCACAGCATCAAGCCTGTTTGCTCAGCGACTAAAGACACTTCGGG
A_24_P328969	0.136369	0.00699	-3.24936	-2.42447	-0.800391	A_24_P328969	NM_030799	AATTATCTCGCTGTTGGTTAGACTTAACACTGTTAATCTTCAGCCAAATATCACATATGG
A_23_P140994	0.1365	0.007	-3.24854	-2.42594	-0.454769	A_23_P140994	NM_007242	AAACGTTATCAAACTGAAGCGTGAGGAAGAGACCCTGGACACCATCAAGCAGTACTATGT
A_23_P303210	0.273923	0.0329	2.41138	-3.8833	1.42321	A_23_P303210	NM_153687	TTTAGGTTCCAACTGTGTTAGACATGAGTTTGCTAGATCCATGGTCTCTAGATGGTTTAC
A_33_P3424132	0.25389	0.0269	2.52037	-3.69867	1.42668	A_33_P3424132	NR_024283	TTATTAACAGAAAACCCATTCTCCCATGGCCATGGAATAAATGCCATGCTATATTTAAGG
A_23_P55270	0.233419	0.0223	2.62213	-3.52428	1.42753	A_23_P55270	NM_002988	ACATTCAATGCATGGATCAATCAGTGTGATTAGCTTTCTCAGCAGACATTGTGCCATATG
A_23_P430201	0.125849	0.00582	3.34836	-2.24933	1.42895	A_23_P430201	NM_152446	GGCCAAATATCCTACTGTGATCACTTCAGTCATATCCTGGACCGTCTTTGGTTTACTGTG
A_23_P33723	0.117825	0.00508	3.42283	-2.11762	1.42917	A_23_P33723	NM_004244	ATTCACCTCTCTCACTGACTATTACAGTTGCATTTTTATGGAGTTCTTCTTCTCCTAGGA
A_23_P334798	0.144713	0.00784	3.18759	-2.53374	1.43283	A_23_P334798	NM_024512	AGCCTTATGGACAATCCTATTGATAATGCCCAATGTGAAGATGGCAATGAAATAATGGAA
A_23_P209954	0.227764	0.0213	2.64944	-3.4772	1.43368	A_23_P209954	NM_006433	GTGTGTAGGACGGGGAGGTCACGATGGCGCGACGTCTGCAGAAATTTCATGAGGAGGTAT
A_24_P940115	0.280383	0.0346	2.38431	-3.92875	1.43376	A_24_P940115	NM_182643	TTTGGATATCAGTGTTCCTCATGAAGATATACATGGATATTCAATTTTGATGGCTTCCAG
A_23_P429998	0.281846	0.035	2.37759	-3.94002	1.43381	A_23_P429998	NM_006732	TTTTTACAATCTGTATCTTTGACAATTCTGGGTGCGAGTGTGAGAGTGTGAGCAGGGCTT
A_33_P3217465	0.136703	0.00705	-3.24466	-2.4328	-0.622332	A_33_P3217465	NM_021242	CATTCTATCGTGTTGTACATAGAATGATGAAGGGTTCCACTGTTGTTGTATGTCTTAAAT
A_33_P3409062	0.060672	0.00136	4.14836	-0.85003	1.43381	A_33_P3409062	NM_003332	GAGTGCCATCCCTGAGAGACCAGACCGCTCCCCAATACTCTCCTAAAATAAACATGAAGC
A_33_P3342081	0.062472	0.00146	4.10904	-0.9176	1.43425	A_33_P3342081	NM_001198	CCTCTACTCAAAGTTAAAACTGACCAAAGTTACTGGCTTTTTACTTTGCTAGAACAACAA
A_33_P3247372	0.137439	0.0071	3.24081	-2.4396	0.866723	A_33_P3247372	AK124064	AGAACAGTGTATCCAGTGAAAATATCCTTCAAAGTGAAGGGGAAATAAACACTTTTCCAC
A_33_P3315704	0.137439	0.00711	-3.24053	-2.4401	-0.717067	A_33_P3315704		TAGTTCTCCCTTTATCGTTTCCTCAGAGGCCCCTTATCTGTCGGCTCCAAACCCTCTCCC
A_23_P334263	0.137756	0.00713	-3.23898	-2.44284	-0.584387	A_23_P334263	NM_145204	ATGGCTGCAATCTCAGTGCCTGAGGGAAGATGCCTAGTAGAGGAAAGCTTAATACTCTTT
A_24_P118527	0.138054	0.00715	-3.23751	-2.44545	-0.900418	A_24_P118527	NM_133261	CCTGGAGCCCACCTTAGTTCTGGAACCCAGCCTGTTTCTGGAACCCAATCCAGTTCCAGA
A_33_P3361202	0.076717	0.0022	3.88068	-1.31309	1.43567	A_33_P3361202	NM_145257	GTAGCTTGATGCTATAGTTGCTTTGGTATCAAACTTAATACCTAACCCATATAAGATCCT
A_33_P3318852	0.138158	0.00716	-3.23649	-2.44725	-0.575119	A_33_P3318852	NM_198881	GAGTCTGAAAGTGTGACTCTCATGTCACTGATTCATTTCTGAAGTGTTAAATTCAGAATA
A_24_P237036	0.022665	0.000209	5.24454	0.95357	1.43577	A_24_P237036	NM_003807	ATGAACGCCTGGTTCGACTGCGTGATGGTACCCGGTCTTACTTCGGGGCTTTCATGGTGT
A_33_P3703501	0.138272	0.00718	-3.23544	-2.44911	-0.768223	A_33_P3703501	NM_198321	GAATTGAGATTCATCATCAAAGAGCAATGCAGCGTCGTTAAAATAAAAACTGTGCCTTTT
A_33_P3279720	0.100812	0.00379	3.58208	-1.83653	1.43651	A_33_P3279720		GTTGCCCCCAGCCTGTAAGGCTGGCCTCCCCTACAATCTCAGCCGACAAGAGGGACATCT
A_23_P250118	0.138513	0.0072	3.23389	-2.45185	0.562165	A_23_P250118	NM_024610	AGATTGCCTCAAATACTACTACGACTCCTCAAACATTCATTTCTACGGATGACTTGCTGG
A_33_P3321432	0.115833	0.00491	3.44101	-2.08549	1.44183	A_33_P3321432	NM_016613	GCATTTCAAATGCACTCCGATTATGCTGTGGTTTTATTCACATAAGCACAATATGTGTTT
A_23_P412562	0.012014	5.24e-05	6.12156	2.26593	1.44196	A_23_P412562	NM_174896	GAGCAATCACTTGGCTGAGAACCATTCTGCAGACTTTGACCCCATTGTCTATGCTCAAAT
A_23_P418031	0.065774	0.00161	4.05406	-1.01236	1.448	A_23_P418031	NM_001136265	GAAACCAACCTGTTTACTGTACTGTTGTAAATATCATGCCCTTTATATCCTGTATATTGG
A_33_P3383422	0.138796	0.00723	-3.23157	-2.45595	-0.810257	A_33_P3383422	NM_021004	CGTGACGGGCACCGTGTGCCATGTGGGGAAGGCGGAGGACCGGGAGCGGCTGGTGGCCAC
A_33_P3374293	0.138909	0.00724	-3.23082	-2.45727	-0.605533	A_33_P3374293	NM_024854	GTCCTATTTTCAAATAAGAAATGGTAGCATAAGCTGTAAAACTGTAGTCTTCTCTGCAGA
A_33_P3382914	0.139078	0.00725	-3.22986	-2.45897	-0.986954	A_33_P3382914	AK127527	ATGAATATTCACGGCTCCGATGGTGTCTCTGAGCCTCCTAACCATCTGGAATTAAACCAA
A_23_P378526	0.139579	0.00728	3.22762	-2.46294	0.778053	A_23_P378526	NM_016434	AGCTACCTTGGGGTCTGGGGTGGGTTTCTGGGAAAGTGCTTCCCCAGAACTTCCCTGGCT
A_23_P140967	0.139874	0.0073	-3.22618	-2.4655	-0.741875	A_23_P140967	NM_000243	CTCATTTTCCCTCAGAACCCCACGGCAAGGATATATGTCCCCTTGTTCTCTCTGCTTCTG
A_33_P3397473	0.268206	0.0309	2.44505	-3.82651	1.44898	A_33_P3397473		TCTGAAGACATGGTCATGTATTACTGTGTGAGAGACACAGTGCAAAAACCCACATCCTGA
A_23_P352266	0.189336	0.0134	2.89852	-3.04338	1.44957	A_23_P352266	NM_000633	TGGCTGATATTCTGCAACACTGTACACATAAAAAATACGGTAAGGATACTTTACATGGTT
A_23_P330070	0.307543	0.0434	2.25881	-4.13721	1.44975	A_23_P330070	NM_001032281	GCCTTCTGCATTCATGCATCCATGTTCTTTCTAGGATTGGATAGCATTTCATGCCTATGT
A_24_P811704	0.140151	0.00733	-3.22381	-2.46969	-0.626943	A_24_P811704	NM_003622	TCTAAGTAGGGCATCCTTAGAAACTCAGAAGTTGGATCTGATGGCTGAAATATCTAACTT
A_24_P349821	0.140151	0.00733	-3.22359	-2.47006	-0.586771	A_24_P349821	NM_004294	AGATGCTCTGGAAGCATAAAGCACTACAGAAATATATGGAGAACCTGAGTAAGGAGTACC
A_23_P326009	0.140357	0.00736	-3.22202	-2.47284	-0.995123	A_23_P326009	NM_020813	CATGAATTCTAAAACTTCATCCTCTTTTGTCCCTTTCGAGTTAACATTACAGCCACAGTG
A_33_P3668839	0.140357	0.00736	-3.22164	-2.47352	-0.432501	A_33_P3668839	NR_036539	CCTAGACGCCAATGGAAAGAAAATGGGACTTTAAGCTTTGTTTGAACATATATTCTGTTA
A_33_P3316456	0.242262	0.0243	2.5773	-3.60133	1.45	A_33_P3316456	NM_001200050	AATACACCAGCTCATTTGGCTGCTCAGTCTAACTCTAGAATGGATGCTTTTGAATTCATT
A_23_P137248	0.131336	0.0064	3.29724	-2.33976	1.45014	A_23_P137248	NR_028062	AAGCACATGAACAGGTGTCTTAATGCATTTGGATACTTTGGGGTGTGTGCCTGTCTGTGT
A_23_P33583	0.025057	0.000253	5.12616	0.76712	1.45053	A_23_P33583	NM_018897	ATGTCAACTTAATTCATAACCAGAAGACATCATTTCCTTGTTCCTATTTCTTGTTGGCTG
A_24_P844984	0.018664	0.000136	5.50793	1.36056	1.45109	A_24_P844984	NM_002644	TCTCCAGAAAGCTAAAATTTAATTTCTTTTTTCCTCTGAGTTCTGTACTTCAACCAGCCT
A_23_P79094	0.250085	0.026	2.53958	-3.66589	1.45115	A_23_P79094	NM_006865	CTGTGTCAGTCACAGGGAGGGATGCACACTTTCCTTTTGACCAAGGAGGGGGCAGCTGAT
A_23_P214011	0.310405	0.0447	2.24185	-4.16506	1.4512	A_23_P214011	NM_004932	GCCACCACATGTATCACGGGTCACTTGAAATTCTTTCAGCTATCAGTAGGCTAATGTCAA
A_23_P103971	0.255141	0.0273	2.51403	-3.70947	1.45213	A_23_P103971	NM_178134	AGTTTGATCAAAACTCCACTCAGTATCTGCATTACTTTTATCTCTGCAAATATCTGCATG
A_32_P2392	0.140494	0.0074	3.21887	-2.47842	0.481388	A_32_P2392	NM_181077	TTCTTTTTTAATTTCATAATTGTAGGTCATTAGCGTGCATATCGAGTTTGCCCTTACGTG
A_23_P24716	0.179464	0.0121	2.95438	-2.94525	1.45321	A_23_P24716	NM_017870	ATGGTCGTGAGGAAGGGCTCATGCCCCTTATTTATGGGAACCATCTCATTCTAACAGAAT
A_23_P209731	0.198704	0.0153	2.82824	-3.16647	1.45381	A_23_P209731	NM_025139	TCAGGGCTAAAGGAAGCGGGAATTGACTTTCTTAAGCTTTGTTTTGATTACAGTGTAAGA
A_33_P3267731	0.303552	0.042	2.27615	-4.10864	1.45415	A_33_P3267731	NR_034016	ACGCAGCATCCGACACATCCCACAACCTTGAGTCTGCTATGAGTCAAGTGTGGTCGCTGT
A_33_P3299279	0.059689	0.00133	4.16197	-0.82668	1.4569	A_33_P3299279	NM_001014279	GCAGAAGGCTTTTTGGATTCTCCTCCTTGAAAAGATTCTCAGTTACCAAACGTCTCCACC
A_23_P114414	0.140494	0.00741	-3.21776	-2.48038	-0.791471	A_23_P114414	NM_001031855	CACCTTCCCCACTGCCGTCGGGGGGAGTCTTCTTGTAAATATATCTAATTGCAATAACAT
A_33_P3336262	0.1406	0.00743	-3.21658	-2.48247	-0.730974	A_33_P3336262	XM_003403417	TACAAGGTCATCTTTGTAGCCCAGGTGTTGACTGGCCCCTAAGCCTCTGCACAGAGCACC
A_23_P8452	0.1406	0.00743	-3.21646	-2.48268	-0.661979	A_23_P8452	NM_001040167	AAGCGAATGATAAGGGAAAAGTTCTCAGGGAATTGAAGTGTTGTTGCTATGGTGACGTCC
A_23_P168864	0.1406	0.00743	-3.21635	-2.48288	-0.527941	A_23_P168864	NM_001029976	CTGAAGCCCCATGAATGTAACCAGTGTGGTAAAGCCTTCAACCGAAGCTCAAATCTCATT
A_32_P6172	0.1406	0.00744	-3.21616	-2.48322	-0.851752	A_32_P6172	NR_027387	CTTCATTTTCAGACATTTGGTCAACAAATACTTCTTGGACGTTTATATGCAAAGCAATGC
A_23_P300056	0.140753	0.00745	3.21527	-2.48479	0.760032	A_23_P300056	NM_044472	TCCCACTACTGTAGAAAGATCGTTTAAAAACAAAGGAATAAAACCATCCTGTTTGAAAGC
A_23_P36305	0.141099	0.00748	3.21314	-2.48855	0.917044	A_23_P36305	NM_033388	TGGCAGGACCTGGCCTGTTTGTTTAAAAATGAAGTATGGGTTGGGGGATTACGCTAGTTT
A_23_P121527	0.0699	0.00182	3.9846	-1.13251	1.45706	A_23_P121527	NM_015990	CTTTTGATATTGACAAAATTGTTTGGATATCCTTATGTTCTCAAGTCTGTATCTGCCTCC
A_23_P141802	0.104881	0.00411	3.53721	-1.91563	1.45739	A_23_P141802	NM_001040147	TCAGTCCACGCTGTTTAGAGCTGACCACCCATTCCTATTTGTTATCAGGAAGGATGACAT
A_23_P45786	0.141099	0.00749	3.21223	-2.49016	0.830553	A_23_P45786	NM_001852	GACTGAGGTCTATGCCAGTTCCTGATCCCATCTCACTCTCTGGACCTACCAGGTGACTGC
A_33_P3341731	0.141099	0.00749	-3.2122	-2.49022	-0.478816	A_33_P3341731		TCGCGACGGCCTCCGAGACGCCAGCTGCCCCTTCTCGGCTGTGTGGCTTCGACTTCCTGA
A_33_P3414574	0.141099	0.0075	-3.21189	-2.49076	-0.498626	A_33_P3414574	NM_005880	CCACAACCACTTTAAACATAAGAAATGTGGTGGCAATATAAAGTTTGTAGCCTTTCCAAT
A_23_P254741	0.140494	0.00739	3.21925	-2.47775	1.4585	A_23_P254741	NM_003102	AGAGCTGCTCCTTTGGGGGAATGTTTGGCAACCTTTGTGTTACAGATTAAAAATTCAGCA
A_33_P3297245	0.141185	0.0075	-3.21123	-2.49193	-0.379458	A_33_P3297245	NM_012250	TAGAGCATACCCTTGTATAGCTTCAGGTGCTAGAATTAAAATTGATCTGTTATCACAAGA
A_33_P3379061	0.208353	0.0174	2.75879	-3.28762	1.45922	A_33_P3379061	NM_001001938	CCTCTGCCATATGTTTTCTGCCAAATTAATTGCCTTAAGATTTTCCTTAAGCTTTTGGAA
A_23_P200260	0.024555	0.000242	5.15419	0.81146	1.45962	A_23_P200260	NM_014801	CCCAAATCACCACAACCAACCAATACCGCGATCCATGAGGGACTCCTCCTGTGGAAAAGG
A_23_P168592	0.141971	0.00756	-3.20734	-2.49881	-0.640529	A_23_P168592	NM_138771	GGGCAGTATCAGATAGCAGTTGAAAATCACCTTGTGCTGCTCCATCCACTGTGGATTATA
A_23_P150693	0.307534	0.0434	2.25894	-4.13699	1.45972	A_23_P150693	NM_014344	ACTCATTCCTGACCTCTTGTCATTTTGGCCTGAAGGCTACAAATTCAGGGTCAGCTGTAT
A_23_P162300	0.142019	0.00757	3.20656	-2.50019	0.721328	A_23_P162300	NM_007199	TTGTCTCATGACCAAATCCACGCTCAATTAGAGCCATTCAAAATTCCTTAAGATCATGGG
A_23_P67748	0.142106	0.00758	-3.20572	-2.50168	-0.688959	A_23_P67748	NM_004218	AGAACATCCTCACAGAGATCTACCGCATCGTGTCACAGAAACAGATCGCAGACCGTGCTG
A_33_P3273238	0.142106	0.00759	-3.20516	-2.50267	-0.631498	A_33_P3273238	NM_207333	TTGATTGAATAGAAGGGGTGAGAGCATTCTTGCATCATGTGAGATCCTACAGGAAAAGCA
A_24_P723735	0.142106	0.00759	-3.20505	-2.50286	-0.942619	A_24_P723735		TTACTCGACATCGAAGTAGTCATACCGGAGAGAAACCCTACAAACGTAAGGAATGCAGCA
A_33_P3256396	0.098213	0.00354	3.61938	-1.77083	1.46028	A_33_P3256396	NM_003585	ATGCTTCACTCAATGATTCCACAAGCCCTGGGGGTGAATGAGACACAGGGCCTGCCCTCA
A_33_P3237674	0.050272	0.00096	4.34508	-0.51457	1.46208	A_33_P3237674	EU030677	ACGAACCTAAACTTTCAAAACCTGTCAGTGATTGGGTTCCGAATCCTCCTCCTGAAAGTG
A_33_P3241021	0.012371	5.68e-05	6.06798	2.18927	1.46294	A_33_P3241021	AK303383	CACCCATGGAAGTGGTCAAATGGCAAAGAATTTAACAACTGGTAAGTCTCCAGAAGTCTC
A_33_P3259736	0.142446	0.00762	-3.20277	-2.5069	-0.90612	A_33_P3259736	NM_014324	GTGGCTTAGGCCAAAAGAAATATCTAACCATTCAATTTATAAATAATTAGGTCCCCAACG
A_33_P3267296	0.104482	0.00408	3.54179	-1.90755	1.46316	A_33_P3267296	NM_016594	AGGGCAATCATTCCTTCTCACTTGGCCTATGGAAAACGGGGATTTCCACCATCTGTCCCA
A_23_P36888	0.080977	0.00249	3.81271	-1.43169	1.46337	A_23_P36888	NM_138371	TGAACAGACTGACCTTGTTAACTTAAGCCTGGAGTCCATGCCTCGTCTTCCTTTTGTTCA
A_23_P382065	0.077286	0.00224	3.87027	-1.33122	1.46752	A_23_P382065	NM_016242	AGTTTTCCGGGCCAAGAATTTTTATCCATGAAGACTTTCCTACTTTTCTCGGTGTTCTTA
A_23_P142075	0.30762	0.0435	2.25694	-4.14028	1.46764	A_23_P142075	NM_001611	TTTGCTGAGTTCCGGGGTGCAATGGGGGAGGGAGGGAGGGAAAGCTTCCTCCTAAATCAA
A_23_P114466	0.143553	0.0077	-3.19722	-2.51672	-0.830475	A_23_P114466	NM_033284	TACAGTGTAGCTTTCAGCCCCGATGGAAAGTACTTGGCTAGTGGATCCTTTGACAAGTAT
A_24_P126741	0.143721	0.00772	3.19629	-2.51836	0.784414	A_24_P126741		AGCCTCCAACCACACTAACAAGATTCAAGATTACTTGCAACAGCTCACAGGAGCGAGAAT
A_33_P3326672	0.143964	0.00773	-3.19508	-2.52049	-0.725926	A_33_P3326672	NM_001001662	TCCCTGTACACAGTTGGACTTCTTGCAGTGAGGAAATAAATGTGTTCCCTGCTGAACTTC
A_23_P130919	0.144038	0.00775	3.19411	-2.52222	0.60946	A_23_P130919	NM_130807	CTCAAAGAACTCCATGAAATCAGGAACTGCTTGATGAAATGTATCTCCTTGTACCTGGAA
A_33_P3350828	0.144038	0.00775	-3.19387	-2.52263	-0.482546	A_33_P3350828	NM_021235	TCTGTCCCTCGCGTTATTTATTCTACACTGCCACTTCTGTAAGAAAAACAGTTTCTCAAT
A_23_P339588	0.190954	0.0137	2.88633	-3.06475	1.46909	A_23_P339588	NM_138810	TGCTTTTGTCATAGTTCCACTCTCTCAGATACATGTATCTAATGAAACTGAATAAATCCG
A_23_P169154	0.144038	0.00775	-3.19356	-2.52318	-0.642818	A_23_P169154	NM_024896	ATGGAGGAAATGAGAGAGGAATGCTCTTGAAAGGTGGTCTGTGGATCTGTCTGAATAGAA
A_23_P22214	0.144038	0.00776	-3.19334	-2.52358	-0.54099	A_23_P22214	NM_004157	CTGCATGGACATCATGAAGAGGAACATCTCACACTATGAGGAACAGCTGGTGAAGATGTT
A_33_P3218955	0.144106	0.00777	-3.19232	-2.52538	-0.840219	A_33_P3218955	NM_021140	AGACTGGTTTATTGTTAAGTTGCAATTACTGCAATGACAGACCAATAAACAATTGCTGCC
A_23_P430411	0.274236	0.033	2.41021	-3.88525	1.47082	A_23_P430411	L78790	TGTCCCCACAAAAAGTGACGCTTTACCTGCGACCAGGCTTCGGGTCCTTCGTGGACAAGA
A_32_P201530	0.144106	0.00777	-3.1922	-2.52559	-0.463009	A_32_P201530	NM_025248	GTGGATATTCTGTGACCTCTGTCGGTGTAACTTGACAATTTCTAAATGGAAAAGGGTTGC
A_33_P3247678	0.144132	0.00778	3.19181	-2.52628	0.648782	A_33_P3247678	XR_109361	GCCTAGGCAACATAGCGAAACCCTATAATCCACAAAAAGGGGGAGAAAGAGACCAAAAAA
A_33_P3223495	0.144175	0.00779	-3.19114	-2.52747	-0.831964	A_33_P3223495	BX537670	GAGGTTTCTTCGTTTTGGAAAAGTAGAGGTATAAAATAACCTTTTTTGCTGGATACTGTC
A_23_P63153	0.144175	0.00779	3.19107	-2.5276	0.68017	A_23_P63153	NM_007204	GATACCTTTGGATATCCATCCTCCTCGACTTATAGTACAGTGGTGTATAGTGGCATTTCT
A_32_P902957	0.079847	0.00241	3.82943	-1.40247	1.47085	A_32_P902957	NM_138450	AACTGGAATGGGAGTTTAGGTCCAATTTGGGCAAGGTTGTTTGAATTTCAATAATCAGGG
A_33_P3414202	0.144182	0.0078	-3.19045	-2.52868	-0.697597	A_33_P3414202	NM_001170704	ATGATGCACGGTGCTACACCTACCACTGTGTCTGCAGCAACAACACCTGCCACCAGCGTT
A_23_P156687	0.144292	0.00781	3.18975	-2.52993	0.671417	A_23_P156687	NM_001710	AAGGAGGTCTACATCAAGAATGGGGATAAGAAAGGCAGCTGTGAGAGAGATGCTCAATAT
A_23_P70318	0.144574	0.00783	-3.18841	-2.5323	-0.605265	A_23_P70318	NM_014936	TGTTTTTGGGTGTCTCCTTCTTGTGCCCATATCTGATAAGCTTTATGGATTATTGCATTT
A_23_P391396	0.079096	0.00235	3.84485	-1.37555	1.47143	A_23_P391396	NM_001005463	AAATTGCCTCCATTTTATTTTGTACGAGTAAGGGTTTGATCTACAAAAGAGCTCACATGG
A_24_P238143	0.144754	0.00785	3.18698	-2.53483	0.875521	A_24_P238143	NM_001006607	GAGACCTGAGTCCTCAAGAAAACCCTTTTCTGGAAGTATCTGCTCCTTCAGAACATTTTA
A_23_P209449	0.120597	0.00531	3.39854	-2.16056	1.47178	A_23_P209449	NM_003507	TTTTAAAACTCCAACACAGGTTTTGGCATCTTTTGTGCTGTATCTTTTAAGTGCATGTGA
A_33_P3218531	0.272281	0.0325	2.4183	-3.87164	1.47216	A_33_P3218531		AGTGGTAACTCCATTCCAGCAAATCACCCTGTTCCAGGCAGGGCAAGTCCAGGGAGAGCT
A_23_P384748	0.165449	0.0103	3.03936	-2.79558	1.4725	A_23_P384748	NM_172069	TGGGTTACAGAAGAGTTTCTAAGTTCCTAGAGAGCCATTTAATAATTAGTTGGTGAGCCA
A_33_P3242703	0.145069	0.00788	-3.18481	-2.53866	-0.998193	A_33_P3242703	AK292160	ATGGCAAGTTCTACGTGGGAGTCTGTGCATTTGTGAGGGTCCAGCTGAAGGTGAGGGGAT
A_33_P3366053	0.145085	0.00789	3.18446	-2.53928	0.976689	A_33_P3366053	NM_001125	GGGGAAGAGATAAACTTTATGCATAACATTAGGGTAAATCAATAAAGATGGTCTGACACA
A_23_P112026	0.104329	0.00404	3.54631	-1.89958	1.47437	A_23_P112026	NM_002164	ATCTGCAAATCGTGACTAAGTACATCCTGATTCCTGCAAGCCAGCAGCCAAAGGAGAATA
A_33_P3317618	0.147342	0.00816	3.16633	-2.57134	1.47457	A_33_P3317618	NM_003178	GATTGAAGTACCTCTCTTTTGTGACTCTTGTACAGCTTAATGTGCAATAAAGGAAAAGTT
A_33_P3271725	0.145329	0.00791	-3.18262	-2.54253	-0.644328	A_33_P3271725	NM_025055	GCTGCAGGAGCAAGAAAAAGGTTTCAGGCACCCCTCGAACTCCATCATCATAGAACAGCC
A_23_P75310	0.133435	0.00665	3.27678	-2.37597	1.47462	A_23_P75310	NM_021226	ATCAGATGCTGCTCCAACCATGCAGTTCCTGGTGAGGGTCAGAAGGGGACGGTACCAAGA
A_33_P3399793	0.145329	0.00792	-3.18196	-2.5437	-0.843568	A_33_P3399793	AK130290	AATATTAATTACAGAAGGATTCCAGTTTACTTACCCATTTTCCTGCTGATGGGCATTTAG
A_23_P1519	0.168958	0.0108	3.0153	-2.83801	1.47554	A_23_P1519	NM_004910	TGGAGAGAAGGTGGATGTCTACATCATGACGCAGCCGCTGTCGGGCAAGTGGATCCACTT
A_23_P1083	0.100637	0.00377	3.58516	-1.8311	1.476	A_23_P1083	NM_002060	TTTTGCAGCTGATCCAGAGGAACCCAGAGCCAACTTACCCCAACCTCACCCTATGGAACA
A_33_P3221177	0.145357	0.00794	-3.18087	-2.54563	-0.73545	A_33_P3221177	NM_153251	TTTTTCCACAGAGTTTTGCTCTGTCTCCCAGGCAGGAGTGCAGTGGCGGGATCTTGGCTC
A_33_P3221234	0.145357	0.00795	-3.18039	-2.54647	-0.742984	A_33_P3221234	NM_001145349	GGGAGAATATGTGCATTCTTTTCAATGATCACAAGACTCTAACAAAGGGGATTTTTAATC
A_23_P324813	0.294654	0.0394	2.31253	-4.04846	1.47612	A_23_P324813	NM_181844	TGATTATGGGACGAGGGTAGAAAGTAAGAAGCACTTTTGAATTTGTGGGGTAGAACTTCA
A_23_P16006	0.145357	0.00795	-3.18026	-2.54671	-0.572716	A_23_P16006	NM_198457	AAGACCTTCAGTCACAAGCCATCCCTTGTTCACCATCGTAGACTTCATACTGGAGAGAAA
A_33_P3380101	0.145435	0.00796	3.17958	-2.5479	0.436764	A_33_P3380101	NM_018067	ACAGAACAAAGATGGAAGTGGCCTGGGCCCCTGGGGGTGGGTCCTCTCTGTTGTTTTTAA
A_23_P78092	0.206183	0.0166	2.78338	-3.24478	1.47661	A_23_P78092	NM_001003927	GCTGAATCAGACACTTGGAAAAGAACAAAACAGCTCACAGGACCCAACCTAGTGATGCAA
A_33_P3286157	0.073573	0.00202	3.92638	-1.23354	1.47686	A_33_P3286157	NM_003327	TTACGTATGCCATGCATACCTCCTGCCCCGCGGGACCACAATAAAAACCTTGGCAGACGG
A_23_P140427	0.034546	0.000436	4.80239	0.24634	1.47745	A_23_P140427	NM_016337	TACATTTCTTTGGGTTTCTAGAGACGCCCCTAAGTCACCTGCTTCATTAGACGGTTTCCA
A_33_P3224495	0.155119	0.00901	3.11275	-2.66603	1.47807	A_33_P3224495	XM_003118553	CCCCAGGGCTTGTTCTCTTCAACACCACATTACCCTACATTATTATTCAATTATTAAATA
A_23_P44421	0.138774	0.00722	3.23196	-2.45526	1.47962	A_23_P44421	NM_153692	GAGTTAGGCAGTTCTTGGCAGAATACCATGAGCACCAGATGAAAGGAAAGGCGTTTTCAA
A_33_P3330039	0.049458	0.000935	4.36052	-0.48843	1.47968	A_33_P3330039	NM_016274	CGGGTTGGACAGACTCTTATCTCCGTGTTGCTGGATAAAGCTTTTTTATTTACCTCAATC
A_23_P88095	0.145899	0.00801	3.17578	-2.55464	0.854222	A_23_P88095	NM_014832	ATGACATTCACGCATGCTGGGTATAGGCAAGGAAAGTAATTTTCAAAGTACATTTGCAGT
A_33_P3343467	0.145899	0.00802	-3.17566	-2.55485	-0.462727	A_33_P3343467	NR_024416	TCTTTGCCTTTCACCATGTTATGATGCAGCAAGAAGCCCCTCATCAGATACTAGTGCCAT
A_23_P25746	0.146152	0.00803	-3.17443	-2.55701	-0.525374	A_23_P25746	NR_027263	ATGAGCAAAACCACATCTACTCCAATTTGTTAAGTCTGAAAGAAAGTAATTGAGGGGGGA
A_24_P300777	0.089876	0.00304	3.70144	-1.62659	1.48021	A_24_P300777	NM_001109	TATGTGGGAGAGTCAGCTATCTTGTCTGGTTTTCTTGAGACCTCAGATGTGTGTTCAGCA
A_33_P3441576	0.146159	0.00804	-3.17383	-2.55807	-0.674319	A_33_P3441576	BC036880	CCAGCTAGAGATAATGGTGTTAGAATATATTCCTTTCTAATCTGTTTTCTATGCATGCAC
A_32_P827528	0.146262	0.00805	3.17317	-2.55925	0.897253	A_32_P827528	NM_004230	GCTCACCTTGGGGAAGGAAACCTCATGCCTCAGAGTAATTTCTTGTGAATGCAAAGCCTG
A_23_P100022	0.320462	0.049	2.19143	-4.24739	1.48087	A_23_P100022	NM_014848	ATGTCGGCTGTGGAGGGTTAAAGGGATGAGGCTTTCCTTTGTTTAGCAAATCTGTTCACA
A_23_P217228	0.133363	0.00664	3.2777	-2.37433	1.48149	A_23_P217228	NM_016157	CCCCATGTTTACAGATACCGCTAATAAATTGCAGTAGTCCTTCCCATGGAGCCAAAGTAC
A_23_P126844	0.035547	0.000454	4.77821	0.20684	1.48364	A_23_P126844	NM_148965	CGAGAGGGGGTGAAGACATTTCTCAACTTCTCGGCCGGAGTTTGGCTGAGATCGCGGTAT
A_23_P3552	0.146521	0.00808	-3.17106	-2.56297	-0.596952	A_23_P3552	BC009198	ACATATCACAGAGCCTTGCAAATAATAGCAAGATATGTACCATCATGAGTATACTTTTCC
A_23_P157007	0.05049	0.000966	4.34174	-0.52022	1.48404	A_23_P157007	NM_014020	TTGTGTCCTTGGTTTCCTTGGGAGTAGGTCTTCGAAACTTGTGTGGCCAGAGCTCCCAGC
A_23_P49279	0.1468	0.00811	3.16934	-2.56602	0.468698	A_23_P49279	NM_001001436	ATTCTGACTGCATCAATAAGGGCCATCGATTGTTTCTTTCTCGCCTGTCGTTTAGCCTGT
A_23_P40880	0.1468	0.00811	-3.16918	-2.5663	-0.594362	A_23_P40880	NM_178868	GCTACGCTGGAAATACATATTTCAGTTTTATAGCATGGAGATCCAGGACCATACAGTGAT
A_23_P329375	0.271332	0.032	2.42634	-3.85809	1.4849	A_23_P329375	NM_002702	GTTCCTTTGCGGGGAAAATTGCACTAAAACAGAACCTTTTCTTAATCCATGTTGGAAGGA
A_23_P46045	0.198704	0.0151	2.83373	-3.15687	1.48493	A_23_P46045	NM_003617	ATGTACTATGTGACTCATGCTTCTGGATAAATAAAGCACCAAATATGTATCTGTAACCAC
A_24_P102650	0.168905	0.0108	3.01586	-2.83701	1.48516	A_24_P102650	NM_002458	CCAGCCAGTCCAGCTGAATGAAACCTGGGTCAACAGCCATGTGGACAACTGCACCGTGTA
A_23_P56553	0.14744	0.00817	3.16569	-2.57247	0.970726	A_23_P56553	NM_024770	CCTGCCGTTTTGTCATAGGTGAGCTCCTTTGTGCATTTTAAGCACATGTAAGTGGTTCAG
A_23_P13382	0.057726	0.00123	4.20584	-0.75156	1.48543	A_23_P13382	NM_001013254	CCCAGATCCAAGGGGAAACTGCAGGTCAAGGGCTGATAACGGCCATGCAGGATGCTTGAT
A_23_P20443	0.286064	0.0362	2.35927	-3.97065	1.48548	A_23_P20443	NM_021020	GACGTCACTTTTTGGCCATGTAAACTATTTGTGGCAATTTTATGTTTTTATTTATGAATA
A_32_P70315	0.320126	0.0488	2.19313	-4.24462	1.48609	A_32_P70315	NM_003256	TGTTACTGCAAGTGTTTCTTCTGGCTTAGTCTGTTTTCTAAAGCCAGGACTATTCCCTTT
A_33_P3242614	0.154138	0.0089	3.1191	-2.65482	1.48618	A_33_P3242614	NR_002454	CCTGACTTACTACATCACAGGAACAGGGCCTTCGTGGGTAGAAACCAGCCATGCTGATGT
A_23_P157879	0.110253	0.00451	3.48747	-2.00342	1.48854	A_23_P157879	NM_002003	AGTCAAGCCGCCACATGCCCACAACCTCACCAGAGGGAGAATTATGTTTCTAAATATGTT
A_23_P321703	0.147574	0.0082	3.16336	-2.57659	0.856197	A_23_P321703	NM_004049	AGGAAAGATCTGTGAAATGCTCTTCTGTCCTGAAGCAATACTGTTGACCAGAAAGGACAC
A_23_P207456	0.127984	0.00608	3.32506	-2.29054	1.48864	A_23_P207456	NM_005623	GTTTTAACTCTATCTGTCATACATCCTAGTGAATGTAAAATGCAAAATCCTGGTGATGTG
A_33_P3417920	0.147574	0.00821	-3.16292	-2.57737	-0.772928	A_33_P3417920	NM_003886	AGAAAAGATCAATGCTTCCACAGATTCACTGGCCAAGGACCTGATTGTCTCTGCCCTTAA
A_23_P501722	0.136574	0.00704	3.24578	-2.43081	1.48888	A_23_P501722	NM_139022	ACATTGTCTCCACTCCGAAGCAGTTGCTATTGGTCCAAGAGGATGCTCGGGTAGTCTTCG
A_33_P3210866	0.147833	0.00823	-3.1614	-2.58005	-0.517276	A_33_P3210866	CR749856	CTTAAGCTGAAAATGTCACTACCATCTGGAGACTTGGACATGTTTTATTGGGAATATATT
A_24_P33156	0.147867	0.00824	-3.161	-2.58077	-0.435615	A_24_P33156	NM_001010982	CTCATTTGAAGAGCTCCACGATGTGGACCACTTTGAAATTGTTGAGAATCTGACCCAGAA
A_33_P3305885	0.148097	0.00825	-3.15988	-2.58275	-0.748918	A_33_P3305885	NM_006648	AGAAAAACCAGCAAGAGCAAGCTGAAGGCAGGCAAGCTGCTAAATCCCCTGGTGCGGCAG
A_24_P100742	0.148318	0.00827	-3.15879	-2.58467	-0.427394	A_24_P100742	NM_014189	CATTGAACACTAACCCAAAAGAGGTCCAGGAGATGAGGAACAAGATCCGAGAGCAGAATT
A_33_P3233437	0.148605	0.00829	-3.15746	-2.58701	-0.961318	A_33_P3233437		CCTAGAGCAAAGAATAGAGCCCTGGAATGTGACAAGACATGAGACAGTAGTCAAACATTC
A_24_P86240	0.148676	0.0083	3.15692	-2.58797	0.73643	A_24_P86240	NM_198892	CAAGACAAAATTCACTACATGGGTCATTCCATAGTGCAGATGTATTGAAAATGGATGATT
A_33_P3213169	0.202624	0.016	2.80436	-3.20819	1.48967	A_33_P3213169	AK309642	AGACAGTCTTGCCAGAGTGGATCAGAAAGAAGGGATCTGGAAAAAGAGTTACCACGTGTT
A_23_P352932	0.223129	0.0203	2.67454	-3.43383	1.49153	A_23_P352932	NM_052918	CCACCCAAGCAACACTTTCTACCTTGCCTTATTTTTAATTGGATTCACTGTCCAAAATGC
A_23_P501985	0.140357	0.00737	3.22099	-2.47467	1.49161	A_23_P501985	NM_172249	AAACTCAAAGAGAAGGAGGGAGATCCGGTGTCCTTATTACATACAAGACTCAGGAACCCA
A_23_P348028	0.149421	0.00836	-3.15307	-2.59478	-0.649859	A_23_P348028	NM_014440	AACCCGAGCCTGTGAAGTCCTTTCTCTTCTACCACAGCCAGAGTGGCAGGAACTCCACCT
A_33_P3329793	0.149421	0.00836	-3.15281	-2.59524	-0.760167	A_33_P3329793	NR_003228	TCCTTCGACTTTTCCCGACACGGCAAGACCCTGGTGGAGAAGCTGTACGGCGAGGCAAGC
A_23_P78268	0.149586	0.00838	-3.15193	-2.59679	-0.457381	A_23_P78268	NM_016080	TAATCCCGACAGAACATCATGTGAGATTTCTTTAAAATGGATTAAACGATTTCTTCAGCC
A_23_P41804	0.209371	0.0176	2.75153	-3.30025	1.49339	A_23_P41804	NM_033120	TGAACACATCTGAAGCCACTATGTTTCCTGGCTCTAAGGCTCGTCTGTGTAACCCATAAA
A_32_P202859	0.149644	0.00839	-3.15103	-2.59838	-0.821545	A_32_P202859	NM_181788	CACGGACCAATGCCTTTCCCCCATAGGCCCCAAGAAGAGCGGCTGTCACACTCATTGAAA
A_33_P3341616	0.047532	0.000852	4.41319	-0.39949	1.49384	A_33_P3341616	NR_003945	ACTGCCACACAGGAATCCAGGGGAAACATCATGAAGATATCAGATGTAAAATCCCGAGTT
A_23_P212354	0.155119	0.00901	3.11249	-2.66649	1.49526	A_23_P212354	NM_001123041	ATGAAGTCATGCGTTTAATCACATTCGAGTGTTTCAGTGCTTCGCAGATGTCCTTGATGC
A_33_P3457052	0.149644	0.0084	-3.15032	-2.59965	-0.480835	A_33_P3457052	AK025312	AGGAAGTCTCACGAGATCTTTTGGTTATTATAAGAGGGAGTTTTCCTGCACAAGCCCTCA
A_33_P3340639	0.149738	0.00841	3.14969	-2.60075	0.538542	A_33_P3340639	AL832464	GGCCTTTTGTGAGGGACTGTTTGTGACTTTATTCTAAGTCATTTTAGAGTATAGTTATGT
A_33_P3237729	0.176488	0.0117	2.96967	-2.91835	1.49542	A_33_P3237729	NM_003687	CCTGCCAGCTCAGGATATTATGTTTCTTTTTTCATTTTTGCCAGTCTGTTAAGTAAAATG
A_24_P336417	0.149767	0.00842	3.14903	-2.60192	0.653563	A_24_P336417	NM_004736	ATTCGGTTACTGCCCTTTAATACACTCCTATCATCAGCACTTCCACCATGTATTACAAGT
A_23_P103361	0.036643	0.000482	4.74313	0.14937	1.49581	A_23_P103361	NM_005356	CCCACCCACATGTGACACATATGCACCTTGTGTCTGTACACGTGTCCTGTAGTTGCGTGG
A_23_P373464	0.270098	0.0315	2.43544	-3.84274	1.49622	A_23_P373464	NM_002285	AGGCCCCATGGAATCCAAATCTCCTTATTACCTGATGTATTCAGAAACAGTAGAGCTCAT
A_33_P3327702	0.149907	0.00844	3.14759	-2.60446	0.872218	A_33_P3327702	NM_004819	GCTTGACCTGCGGGTGCTTTGCCTTAAAAAGAAATAAAAGATGTGAACTTGGGCAAGTTA
A_33_P3593774	0.063703	0.00152	4.08759	-0.95454	1.49637	A_33_P3593774	NM_003629	CTGATGGTGCATTCTTAATTCGTGAGAGTAGCAAGAAAGGATGCTATGCTTGCTCTGTGG
A_33_P3348639	0.150346	0.00848	3.14555	-2.60808	0.442703	A_33_P3348639	NM_004986	TGTAACACAGTTACAGCAGTTGCTTCAGGCGGTAAACCAACAGCTCACAAAGGAGAAAGA
A_24_P20630	0.20684	0.017	2.77115	-3.26609	1.49886	A_24_P20630	NM_016269	GCCCAAAACTGTCATCCTAACGTTTGTCATTCCAGTTTGAGTTAATGTGCTGAGCATTTT
A_33_P3250944	0.150721	0.00851	-3.14356	-2.61159	-0.667374	A_33_P3250944	NM_001010979	TTATGTAGAGAGATTCTGATGGCATCCAAAACACTGCTCTTCCATTCTCAACATGCCTGC
A_23_P72387	0.150721	0.00851	-3.14336	-2.61195	-0.644428	A_23_P72387	NM_001134647	AGTAAAAATTTTATGAAAAGAAACTTGCAAGGAAAATCCTAGTTTTCAGTCCACTCGCCC
A_24_P917178	0.150923	0.00853	-3.14228	-2.61385	-0.877637	A_24_P917178	BC001801	CTGGGTACCCCACTTAGTAAATGGCGCCACATCTGCCCGGTCACTCAGCGAGAAACTCAA
A_33_P3281176	0.150923	0.00853	-3.14187	-2.61459	-0.985601	A_33_P3281176		GAGCAGTGGACGATCGCGACACCTGTGAACACGCTGTGTTCTCTCCCACTCAACCTGTAA
A_23_P70688	0.088896	0.00299	3.71143	-1.60905	1.4996	A_23_P70688	NM_004271	CTTTTTCTCTAATTGGTCGCCTCCCACCAGACTCACCTGCTTTTCAACTTTTTAGGAGTG
A_24_P282762	0.150996	0.00855	-3.14107	-2.616	-0.503188	A_24_P282762	NM_012290	CGGTCTATTGTAATGCAGATTGTAAATGCACTAAGATATCTCAATGAGATCAAACCCCCT
A_32_P16007	0.162293	0.00989	3.06229	-2.75512	1.50119	A_32_P16007	NM_207355	CGTACAATGCCAGGAAGATGAATGTGTGTTAATGTTGCTGGAACATGGCGCTGATGGAAA
A_33_P3232493	0.151015	0.00856	3.14041	-2.61716	0.9878	A_33_P3232493	AK130794	TTATCATAGTGAACATTTTAAAATGGAGTCACCCAGGACTGGGCACGGTGACTCATGCCT
A_23_P6596	0.151015	0.00856	-3.14009	-2.61773	-0.684052	A_23_P6596	NM_005524	AGTCATCAAAGCCTATTATGGAGAAAAGACGAAGAGCAAGAATAAATGAAAGTCTGAGCC
A_23_P205489	0.151015	0.00856	-3.13999	-2.6179	-0.945163	A_23_P205489	NM_182728	TTTTTTGTAAAGTTGATGCCTTACTTTTTGGATAAATATTTTTGAAGCTGGTATTTCTAT
A_33_P3280875	0.151015	0.00857	-3.13972	-2.61838	-0.616407	A_33_P3280875	NM_006469	GGAATTGGTAAAAGATGTTTATTCTGCAGCAAAAAAGCTGAAGATGGATCGAGTAAAGCA
A_23_P25069	0.014063	7.17e-05	5.91628	1.96976	1.50167	A_23_P25069	XM_003119524	TTTACTCCAACCATGTCATCCATTGAAGAGCTTGAAAACAAGGGCCAAGTGATGAAGACT
A_33_P3379811	0.151271	0.00859	-3.13831	-2.62087	-0.994601	A_33_P3379811	NM_001101339	CTGTGTAGCATTTCCTTCTGGTTAAGAACATGCAGATAATCCAAATAAACAGATTTGACT
A_23_P167250	0.160533	0.00958	3.07959	-2.7246	1.50242	A_23_P167250	NM_021803	AAACCACCTTCCACAAATGCAGGGAGAAGACAGAAACACAGACTAACATGCCCTTCATGT
A_33_P3296587	0.091652	0.00315	3.68272	-1.65947	1.50254	A_33_P3296587	NM_000096	TCTAGCTAAAAGAGCAAGAGTACACATCAACAAAAATGGAAACAAGGCTTTGGCTGAAAA
A_33_P3879789	0.151362	0.00861	-3.13717	-2.62289	-0.870584	A_33_P3879789	BC043286	CTGTCACTAAATACCCACTCTGGTGAGCATATTCCATTTCAATAAAGATCATCGCTTCGG
A_23_P25121	0.097159	0.00348	3.62795	-1.75575	1.50409	A_23_P25121	NM_016594	TTCTCACTTGGCCTATGGAAAACGGGGATTTCCACCATCTGTCCCAGCGGATGCAGTGGT
A_23_P343837	0.151645	0.00863	3.13561	-2.62565	0.838712	A_23_P343837	NM_020367	TGGAAGCAATCTGCATTCATAACTTTGATTGGAGAATAAATGGTATACATGGTGCTGTCT
A_33_P3287428	0.098664	0.00362	3.60719	-1.7923	1.50418	A_33_P3287428	BC107850	ATTTAACGCACTGTTGTATCAGGTCCCTGTGGGAGCCACTGGTTCTTTAGCCTAATAAAG
A_23_P147245	0.152011	0.00866	3.13375	-2.62893	0.964829	A_23_P147245	NM_017784	ACTGTGCCACTCCAATATTTATCAAATCCAAATAGCATGAATGCTTCTCTGTAGTAATAC
A_33_P3642648	0.152108	0.00868	-3.13282	-2.63057	-0.63296	A_33_P3642648	NM_006635	TGCCAATTGTACTCATTCTGCAGTGCCACAGAACACTACAACTTATTCAAATGGAATCTT
A_24_P229531	0.061103	0.00138	4.14218	-0.86065	1.50974	A_24_P229531	NM_001031716	ATTCGGTTGACCAGAGGGTATGCATCCATGTGGAAAGGATGTCTGACACTTTATACTGGA
A_23_P54205	0.152108	0.00868	-3.13258	-2.63101	-0.684333	A_23_P54205	NM_017926	CTGCATACCTTTTGTGTAGAGCTTTTAATATCATTTGAGGAAGTTCCAAATTTGTAGCCA
A_33_P3342260	0.152253	0.0087	-3.13179	-2.6324	-0.428819	A_33_P3342260	NM_000162	CACCCTCTCCATGCCCAACCTAAGATTGTGTGGGTTTTTTAATTAAAAATGTTAAAAGTT
A_33_P3295098	0.152269	0.0087	-3.13141	-2.63307	-0.968877	A_33_P3295098		GTCAAATTTACTGCATTCTAAACTTACTTGGAATATTTCCTCTGTTTGTGACAACTGACC
A_24_P355649	0.095276	0.00336	3.64812	-1.72027	1.50978	A_24_P355649	NM_002017	GGGCTGTTTAAGTCACTGACTTATGAGAAAGCAAAGCACTGGTACAGTTATTTAACAGGC
A_33_P3210735	0.223129	0.0203	2.67427	-3.4343	1.51131	A_33_P3210735	NM_001005210	ACAAGCCAGGCCAGCAACCTAAATACTTGGAGAGGAACTTTTAGAAACTATAATCCTGAC
A_24_P178300	0.152276	0.00871	-3.1306	-2.6345	-0.509048	A_24_P178300	NM_001080835	AAGTCTCTTCATCTACGCCTCTTCAGCCACAGCTCTTGCCTGGTGGGCTTCTCACAGCAG
A_33_P3618429	0.022161	0.000197	5.27813	1.00607	1.51182	A_33_P3618429	AK095793	CACCATGGAAATCACTGTGATTTGTATATATGCCCTAGGAAATTTTTACTGCTGTCTAAT
A_33_P3374035	0.290503	0.0377	2.337	-4.0078	1.51206	A_33_P3374035	AK094630	TGAGACTCCACGCCCAGTCTTTTCTTTTTTCTTTTTTAGAGACAAGGTCGGTCTCTGTCG
A_33_P3276237	0.152497	0.00874	-3.12899	-2.63734	-0.836778	A_33_P3276237		GCTTGTTCTTCTGGCATTTGTTTCCTTGTAGTTTAGTGAGTTATCAGTAAAACCTATCAA
A_23_P254442	0.152497	0.00874	3.12871	-2.63783	0.902297	A_23_P254442	NR_036573	CATTCTGAAGTTCTGGAAAGAAGTACTGGATGGACTGAAGTCCAGGACAACGTTCCAAAG
A_23_P256413	0.182155	0.0124	2.93936	-2.97167	1.51292	A_23_P256413	NM_138410	ATCTAGCTTGTCAGTCCGGTCTTAGAGATACCCTCTTTCCTGAAGTGAGGCGTGCCTGTA
A_32_P208120	0.079407	0.00236	3.84057	-1.38302	1.51531	A_32_P208120	NM_153498	TCGAGGGGCGCTGATTTCATAGGATCTGGTGCTGTATATACGAATCTTGCAAAGCTCTAA
A_24_P684186	0.075317	0.0021	3.90503	-1.27068	1.51685	A_24_P684186	NM_198449	GCTTGACTAACCCCAGATTATCTTTCAAGACTTTAATCTGATCTTGTGTCTTAGAGAAGC
A_23_P154345	0.153044	0.00879	-3.12568	-2.64319	-0.433471	A_23_P154345	NM_014362	AATCTACAGCATGTGGGCCAAATCCAGCCTGCTGCCTGTTTTTATATACCCTGTAAGCTA
A_23_P71946	0.153458	0.00882	-3.12395	-2.64625	-0.777863	A_23_P71946	NM_017688	AGCTTTAGGAGGGATGGGGATCTGTTTCAGATCTAGGCATAACCTGTAAATCACAGGTGT
A_23_P500861	0.06202	0.00143	4.11942	-0.89975	1.51706	A_23_P500861	NM_182961	AACATACAATTTTTAAGAGCTTATATGGCAGCTTCCTTTTTACCTTGTTTTCCTTTGGGG
A_23_P171296	0.153544	0.00884	3.12295	-2.64802	0.724401	A_23_P171296	NM_002436	CCAAAATGACACATCTGTGCAATAGAATGATGTCTGCTCTAGGGAAACCTTCAAAAGCAA
A_23_P124252	0.31212	0.0455	2.23246	-4.18045	1.51816	A_23_P124252	NM_020397	TCCTGTTTGCCAGGCGCTTTCTATACTTAATCCCATGTCATGCGACCCTAGGACTTTTTT
A_33_P3380982	0.153544	0.00885	-3.12255	-2.64872	-0.45864	A_33_P3380982	NM_018247	CCCATGCACCATTCAGTAAACATAAAAATCACAATTCTGCTAATGTCATTTGGAACTTCA
A_23_P87879	0.033929	0.000419	4.82596	0.28478	1.51859	A_23_P87879	NM_001781	TGTGCAATATGTGATGTGGCAAATCTCTATTAGGAAATATTCTGTAATCTTCAGACCTAG
A_33_P3409477	0.198704	0.0152	2.82983	-3.16369	1.51862	A_33_P3409477	NM_032873	CATTGTAATTACAGATGCACCTTTCAGGAGCATCTCCATTAAATGGTTCATAGATGATTT
A_33_P3270451	0.101042	0.00381	3.57871	-1.84246	1.51958	A_33_P3270451	NM_030810	GGCAGAGACCTTGACTCGTTACACCGCTTTGTCCTGAGCCAAGCGAAAGACGAACTTTAG
A_23_P319874	0.154138	0.0089	-3.11924	-2.65457	-0.847201	A_23_P319874	NM_001029840	GCTACTCAAAGTCAGAACTTTTCAAAGTAATCAGTAAATTGAATCAACAGAAAAATATTC
A_23_P413641	0.021039	0.000182	5.32639	1.08121	1.52027	A_23_P413641	NM_020820	CAAAGAAAGGTATGTTGTCTAACAGGGGACCAACAGAAGGTAGTATTGACAACTGTTCCC
A_33_P3337540	0.038127	0.000523	4.69555	0.07112	1.52204	A_33_P3337540	NM_000874	CCCTGTGCCCCAGTGATTAAGTTTTATTATGTAGAAAATAAAGAGCAAACAGTACAGCTG
A_23_P40108	0.209662	0.0177	2.7498	-3.30326	1.52294	A_23_P40108	NM_001853	TCAAAAGGCCCTAGCTAATAAACCTGTAAGCCCAGCATTTGAGAGAAGGTAGGGTGTGTA
A_23_P350451	0.131688	0.00646	3.29256	-2.34805	1.52333	A_23_P350451	NM_001198	ATGACATCAGTGTGATCTCTGTAGTGGAGAAGGAAATTCTGGCCGTGGTCAGAAAAGAGA
A_33_P3310552	0.016518	0.000108	5.65578	1.5842	1.52351	A_33_P3310552	AK131316	AATTTCCAAATGTTCACTCGAGGGTAAGGATTTCTTCTAGCACACCGGTGGTGGAGGATA
A_33_P3351745	0.103694	0.00401	3.5512	-1.89096	1.52395	A_33_P3351745	NM_024070	TTACCCCATTTCAGTCATTTCCTGCTGCAACTAAGTCAGCAACACAGTTTCTCTGATGTC
A_24_P319684	0.154995	0.00898	-3.11447	-2.663	-0.922848	A_24_P319684	NM_024584	ACTGCAAGGAAGTCATAATCAGTGCCTAAATAGACAGGATGTTCCAAAGACCACACCCAG
A_33_P3397693	0.155031	0.00899	-3.11407	-2.6637	-0.453569	A_33_P3397693	NM_003659	GAAACAGTCATCATTCAACTACTGAATTTGAAAGCCTCAGCAGTTTCAATGACAAAAATC
A_23_P164674	0.155119	0.009	-3.11295	-2.66568	-0.706656	A_23_P164674	NM_013362	CATACAAATGTGAAGAGTGTGGGAAGGGCTTCAACAGTAAGTTTAATCTTGACATGCACC
A_33_P3357748	0.1347	0.00682	3.26288	-2.40056	1.52417	A_33_P3357748	NR_003367	AAATCCCTAACCTATGAGCTTTGAATAAGATGAGTACGAACTTCATCGCCCACGTGGCGT
A_32_P85539	0.155119	0.00901	-3.11258	-2.66634	-0.608732	A_32_P85539	NM_013320	TGTAACTGACTGACTGTTGTGTTTTTCAAGACTGATTTTAGGCAGTTTTATGTATCGTGT
A_24_P408603	0.28598	0.0361	2.36011	-3.96925	1.52584	A_24_P408603	NM_171998	AAGCAAGATTATCCAGTGGGTAAATGAGAGTCGACTGGATTCTGTCAGTTCAAAAAAGGA
A_33_P3312504	0.155119	0.00901	-3.11241	-2.66664	-0.654366	A_33_P3312504	NM_012455	GCCCAAGCTCAGCCTGAAGAAGTCCCACTCGAGCCCGTCCCTGCACCAGGATGAGGCTCC
A_33_P3404123	0.155243	0.00903	-3.11148	-2.66828	-0.581178	A_33_P3404123	XM_003118738	ATCTACTGCAGGAGAACCTGCTACCACCCCACGAGTGTCTACCTGCCTGGTTGCCTAAAC
A_23_P121564	0.152269	0.00871	3.13097	-2.63384	1.52593	A_23_P121564	NM_000857	AAAGTTTGGCTTTTGATGTGGATGATGTGAGCTTCATGTGTCTTAAAATCTACTACAAGC
A_23_P73589	0.021268	0.000188	5.30939	1.05478	1.52647	A_23_P73589	NM_002444	GGAATTGTGGGGCAATCTATTAATAGCTGCCTTAAAGTCAGTAACTTACCCTTAGGGAGG
A_23_P105957	0.140494	0.0074	3.21855	-2.47899	1.52812	A_23_P105957	NM_001102	TTCCTTCAAGATCCTGGCTGGGGACAAGAACTACATTACCATGGACGAGCTGCGCCGCGA
A_23_P167920	0.081604	0.00253	3.80266	-1.44925	1.52888	A_23_P167920	NM_005618	ATGGGTGAACTGAATTACGCCTAAGAAGCATGCACTGCCTGAGTGTATATTTTGGATTCT
A_32_P525524	0.155849	0.00909	3.10786	-2.67467	0.722124	A_32_P525524	NM_178495	CCCCAAGGCACATTCACAGGCAGTGGAAGAGTTCCAAAACCTTCTGACCCAGGTGAAAAC
A_23_P214969	0.155849	0.00909	-3.10766	-2.67503	-0.797684	A_23_P214969	NM_006079	CCACCCCCATATGTACAGATGATAATAGGGTGTGGAATGTCGTCAGTGGCAAACATTTCA
A_33_P3229402	0.034546	0.000435	4.80333	0.24788	1.53076	A_33_P3229402	NM_000442	TTCTGAACTCCAACAACGAGAAAATGTCAGATCCCAATATGGAAGCTAACAGTCATTACG
A_33_P3411075	0.152633	0.00876	3.1275	-2.63998	1.53132	A_33_P3411075	NM_003088	CTAAACGCCCATGATAGTAGCTTCAAACTGGAAATAGCGAAATAAAATAACTCAGTCTGC
A_23_P428260	0.155849	0.0091	3.10716	-2.6759	0.787879	A_23_P428260	NM_152999	GCATTTAAGCCATTGTAAATCTGGGTGTGTTACATGAAGTGAAAATTAATTCTTTCTGCC
A_24_P288836	0.056681	0.00119	4.22545	-0.71804	1.53282	A_24_P288836	NR_001435	GATTCTGTGCAGAGCAAGATGCTGACAGGAGCTAGGGGCTTCATGCTGGGGCTCATCATC
A_33_P3283709	0.293045	0.0388	2.31994	-4.03617	1.53289	A_33_P3283709		CACCACTCCTTTCACATACACGAAAGGCCTCACAGTGGAGAAAACCTCTATGAATGTTAG
A_23_P78053	0.156073	0.00913	3.10539	-2.67903	0.608671	A_23_P78053	NM_030802	GACTCTATTTTCTCCCAAAGACACTATTTTTGCAGCTGTTTGAAGTTTGTATATTTTCCG
A_33_P3381206	0.31608	0.047	2.21409	-4.21048	1.53311	A_33_P3381206	AM184015	CGATGAGGCTGAGTATCACTGTGGAGAGAGCCACACGATTGATGGCCAAGTCGGTTGAGC
A_33_P3382217	0.156073	0.00914	3.10504	-2.67966	0.909718	A_33_P3382217	AM177178	AGCAGTAGTTCAGACTCCACATGTTCTGTCATAGAGAAACCTCTGGATAAGTTCTTGCCT
A_33_P3388870	0.156221	0.00915	-3.10426	-2.68104	-0.669301	A_33_P3388870	NM_001487	TATCCCTCCTACCTCACCCGCAGGGGGAAGGAGGGAGGCTGACAAGCCTTGAATAAAACA
[truncated: 32,128 more rows]
